# Supplementary material for: Functional mapping of yeast genomes by saturated transposition
Source: eLife journal article supplement (doi:10.7554/elife.23570), 2017-05-08

## Figure 2 Supplement 1

$$\text{Domain likelihood score} = \frac{\text{longest interval} * \text{tn\_number}}{\text{gene length}^{1.5}}$$

Domain likelihood score = 0 IF tn\_number < 20  
OR longest interval > 90% of CDS  
OR longest interval < 10% of CDS  
OR longest interval < 300 bp

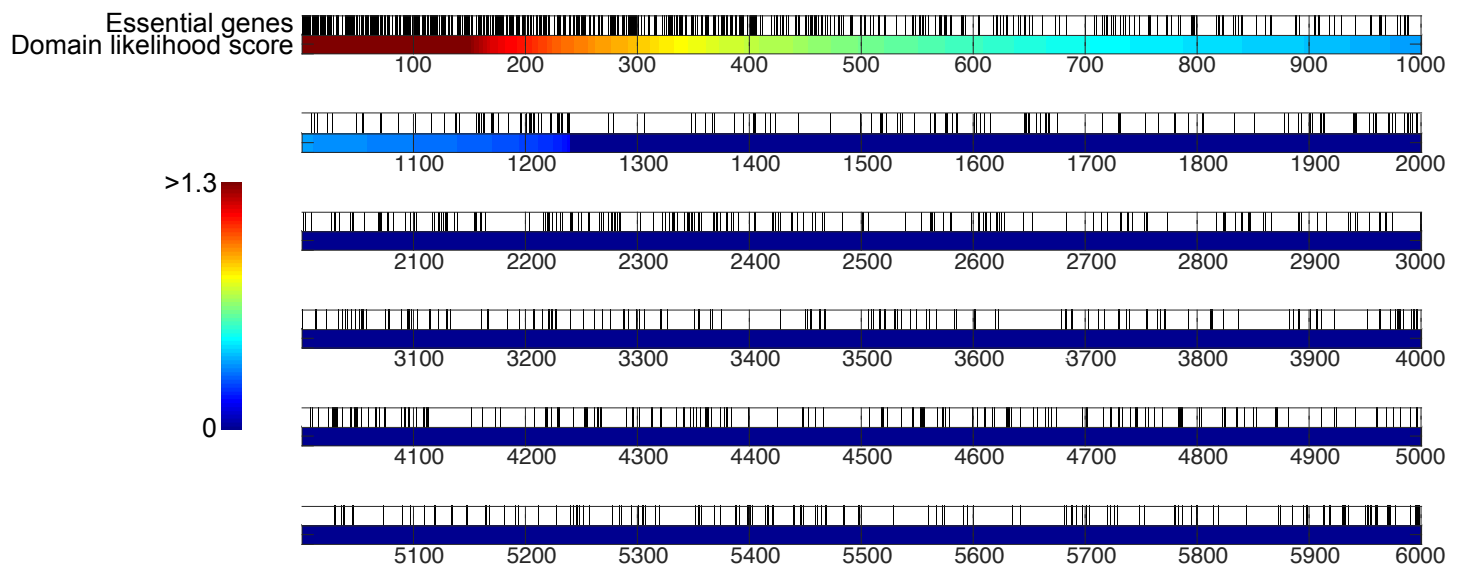

Supplement: supp [file elife_poa_e23570_Figure_2_figure_Supplement_1.pdf › elife_poa_e23570_Figure_2_figure_Supplement_1.pdf]
