# Supplementary material for: Functional mapping of yeast genomes by saturated transposition
Source: eLife journal article supplement (doi:10.7554/elife.23570), 2017-05-08
Supplement: supp [file elife_poa_e23570_Supplementary_File_2.xlsx]

## Sheet: Sheet1
Supplementary File 1: table of genes appearing as essential in our analysis (i.e., their density of transposon is below 1/400 bp), but were not previously annotated as essential. The likely explanation for the low transposon density is written in column B for each gene.
gene	explanation
ACO1
ADA2	auxotroph
ADE12	auxotroph
ADE4	auxotroph
ADE5,7	auxotroph
ADE6	auxotroph
ADE8	auxotroph
AKR1
ALG11
ARC18
ARG82	auxotroph
ARO1	auxotroph
ARO7	auxotroph
ASP3-1	repeated
ASP3-2	repeated
ASP3-3	repeated
ASP3-4	repeated
ATP1
ATP15
ATP2
ATP22
BDF1
BNI1
BRO1
BUD32
BUR2	auxotroph
CCZ1
CDC55
CHO1	auxotroph
CIC1	misannotated
CLA4
CLB2
CLC1
COS2	repeated
COS3	repeated
COS5	repeated
COS7	repeated
CTF3
CTK3
CUP1-1	repeated
CUP1-2	repeated
DBF2
DDI2	repeated
DDI3	repeated
DEF1
DOA4
EFT1	repeated
EFT2	repeated
ENA1	repeated
ENA2	repeated
ERG24	inviable in aerobic conditions
ERR1	repeated
ERR2	repeated
FDH1
FEX1	repeated
FEX2	repeated
GAL1	galactose pathway
GAL4	galactose pathway
GAL7	galactose pathway
GEX1	repeated
GLE2
GSF2	galactose pathway
GSH1	auxotroph
GUA1	auxotroph
HMLALPHA1	repeated
HMLALPHA2	repeated
HMRA2	repeated
HSP32	repeated
HXT15	repeated
HXT16	repeated
HXT6	repeated
HXT7	repeated
IFA38
ILV1
ILV2
IMA3	repeated
IMA4	repeated
IPK1
KAP104
KIC1
LEU2	deleted
MAL12	repeated
MAL32	repeated
MAP1
MATALPHA1	repeated
MATALPHA2	repeated
MDM32
MMS22
MNN9
MON2
MPH2	repeated
MPH3	repeated
MSS116
NUM1
NUP84
OCH1
PAU1	repeated
PAU14	repeated
PAU18	repeated
PAU19	repeated
PAU21	repeated
PAU22	repeated
PAU4	repeated
PAU6	repeated
PAU9	repeated
PCC1
PEP3
PEP5
PER1
PFK2
PHO11	repeated
PHO12	repeated
PMR1
PNO1
PRO1	auxotroph
PRO2	auxotroph
PRS1
RAD50
RAD9
RAI1
RIB4	auxotroph
RPA49
RPB4
RPL11A
RPL12B
RPL13B
RPL16B
RPL1A
RPL1B
RPL20B
RPL31A
RPL7A
RPN1	misannotated
RPS12
RPS19B
RPS26A
RPS9B
RRP40	misannotated
RTT103
SAC1	auxotroph
SCH9
SEC22	auxotroph
SER1	auxotroph
SER2	auxotroph
SIN4	auxotroph
SKY1
SLI15
SMC6	misannotated
SNF1	galactose pathway
SNF2	galactose pathway
SOR1	repeated
SOR2	repeated
SPC72
SRB5
SWI3	galactose pathway
TAF14	galactose pathway
TAF2	misannotated
TAR1	repeated
TEF1	repeated
TEF2	repeated
THO2
THP1
TIF3
TOF1
TOP3
TPD3
TPS2
TRK1
TUP1
VBA3	repeated
VMA1
VMA10
VMA11
VMA2
VMA22
VMA4
VMA5
VMA6
VMA8
VPH1
VPS15
VPS33
VPS36
VPS4
VPS41
VPS45
VPS52
VTH1	repeated
VTH2	repeated
XRN1
YAL037C-B	overlaps with essential gene
YAR060C	repeated
YAR066W	repeated
YAR069C	repeated
YBL111C	repeated
YBL112C	repeated
YBR121C-A	overlaps with essential gene
YCL065W	repeated
YCL068C	repeated
YCL076W	repeated
YDR381C-A
YDR545C-A	repeated
YEL020C-B	overlaps with essential gene
YEL032C-A	overlaps with essential gene
YEL075C	repeated
YEL075W-A	repeated
YEL076C	repeated
YEL076C-A	repeated
YER023C-A	overlaps with essential gene
YER189W	repeated
YER190C-A	repeated
YER190C-B	repeated
YFL066C	repeated
YFL068W	repeated
YGL123C-A	overlaps with essential gene
YGL188C-A	overlaps with essential gene	in the promoter?
YGL260W	repeated
YGR296C-A	repeated
YGR296C-B	repeated
YHL049C	repeated
YHR052W-A	repeated
YHR054C	repeated
YHR054W-A	repeated
YHR069C-A	overlaps with essential gene
YHR212C	repeated
YHR212W-A	repeated
YHR213W	repeated
YHR213W-A	repeated
YHR214C-D	repeated
YHR214W	repeated
YHR218W	repeated
YHR218W-A	repeated
YHR219C-A	repeated
YHR219W	repeated
YIL021C-A	overlaps with essential gene
YIL171W-A	repeated
YIL177C	repeated
YIL177W-A	repeated
YJL026C-A	overlaps with essential gene
YJL220W	repeated
YJL222W-A	repeated
YJL222W-B	repeated
YJL225C	repeated
YJL225W-A	repeated
YKL145W-A	overlaps with essential gene
YLL066C	repeated
YLL066W-A	repeated
YLL067C	repeated
YLL067W-A	repeated
YLR154C-G	repeated
YLR154C-H	repeated
YLR154W-A	repeated
YLR154W-B	repeated
YLR154W-E	repeated
YLR154W-F	repeated
YLR156C-A	repeated
YLR156W	repeated
YLR157C-C	repeated
YLR157W-D	repeated
YLR157W-E	repeated
YLR159C-A	repeated
YLR159W	repeated
YLR161W	repeated
YLR163W-A	overlaps with essential gene
YLR347W-A	overlaps with essential gene
YLR399W-A	overlaps with essential gene
YLR462W	repeated
YLR463C	repeated
YLR466C-A	repeated
YLR467C-A	repeated
YML133C	repeated
YML133W-A	repeated
YML133W-B	repeated
YMR013C-A	overlaps with essential gene
YMR046W-A	repeated
YMR141W-A	overlaps with essential gene
YNL033W	repeated
YNL339W-A	repeated
YNL339W-B	repeated
YOL155W-A	repeated
YOR073W-A	overlaps with essential gene
YOR335W-A	overlaps with essential gene
YOR396C-A	repeated
YPL283W-A	repeated
YPL283W-B	repeated
YPR202W	repeated
YPR203W	repeated
YPR204C-A	repeated
YPR204W	repeated
YRF1-1	repeated
YRF1-2	repeated
YRF1-3	repeated
YRF1-4	repeated
YRF1-5	repeated
YRF1-6	repeated
YRF1-7	repeated
YRF1-8	repeated
ZAP1
ZRT1

## Sheet: Sheet2
ACO1						YAR060C
ADA2						ACO1
ADE12						ADE12
ADE4						ADE4
ADE5%2C7						ADE5%2C7
ADE6						ADE6
ADE8						ALG11
AKR1						ARC18
ALG11						ARG82
ARC18						ASP3-1
ARG82						ASP3-2
ARO1						ASP3-3
ARO7						ASP3-4
ASP3-1						BRO1
ASP3-2						BUD32
ASP3-3						CDC55
ASP3-4						CLC1
ATP1						COS2
ATP15						COS3
ATP2						COS5
ATP22						CUP1-1
BDF1						CUP1-2
BNI1						DOA4
BRO1						EFT1
BUD32						EFT2
BUR2						ENA2
CCZ1						ERG24
CDC55						ERR1
CHO1						ERR2
CIC1						GAL4
CLA4						GLE2
CLB2						GUA1
CLC1						HMLALPHA1
COS2						HMLALPHA2
COS3						HMRA2
COS5						HSP32
COS7						HXT16
CTF3						HXT6
CTK3						HXT7
CUP1-1						ILV1
CUP1-2						ILV2
DBF2						IMA3
DDI2						IMA4
DDI3						KIC1
DEF1						LEU2
DOA4						MATALPHA1
EFT1						MNN9
EFT2						MON2
ENA1						OCH1
ENA2						PAU1
ERG24						PAU14
ERR1						PAU18
ERR2						PAU21
FDH1						PAU22
FEX1						PAU6
FEX2						PNO1
GAL1						PRO1
GAL4						PRO2
GAL7						RAD50
GEX1						RAI1
GLE2						RPN1
GSF2						RPS26A
GSH1						SMC6
GUA1						TAR1
HMLALPHA1						TEF2
HMLALPHA2						TOP3
HMRA2						TUP1
HSP32						VMA1
HXT15						VMA10
HXT16						VMA4
HXT6						VMA5
HXT7						VPS33
IFA38						VPS4
ILV1						VPS45
ILV2						VTH2
IMA3						YAR066W
IMA4						YAR069C
IPK1						YBL111C
KAP104						YBL112C
KIC1						YBR121C-A
LEU2						YCL065W
MAL12						YDR545C-A
MAL32						YEL020C-B
MAP1						YEL075W-A
MATALPHA1						YEL076C
MATALPHA2						YEL076C-A
MDM32						YER023C-A
MMS22						YER190C-A
MNN9						YER190C-B
MON2						YFL068W
MPH2						YGL123C-A
MPH3						YGL188C-A
MSN5						YGR296C-A
MSS116						YGR296C-B
NUM1						YHL049C
NUP84						YHR052W-A
OCH1						YHR054C
PAU1						YHR054W-A
PAU14						YHR069C-A
PAU18						YHR212C
PAU19						YHR212W-A
PAU21						YHR213W
PAU22						YHR213W-A
PAU4						YHR214C-D
PAU6						YHR214W
PAU9						YHR218W
PCC1						YHR218W-A
PEP3						YHR219C-A
PEP5						YHR219W
PER1						YIL171W-A
PFK2						YIL177C
PHO11						YIL177W-A
PHO12						YJL220W
PMR1						YJL222W-A
PNO1						YJL222W-B
PRO1						YJL225C
PRO2						YJL225W-A
PRS1						YKL145W-A
RAD50						YLL066C
RAD9						YLL067C
RAI1						YLL067W-A
RIB4						YLR154C-G
RPA49						YLR154C-H
RPB4						YLR154W-A
RPL11A						YLR154W-B
RPL12B						YLR154W-E
RPL13B						YLR154W-F
RPL16B						YLR156C-A
RPL1A						YLR156W
RPL1B						YLR157C-C
RPL20B						YLR157W-D
RPL31A						YLR157W-E
RPL7A						YLR159C-A
RPN1						YLR159W
RPS12						YLR161W
RPS19B						YLR163W-A
RPS26A						YLR347W-A
RPS9B						YLR399W-A
RRP40						YLR463C
RTT103						YLR466C-A
SAC1						YLR467C-A
SCH9						YML133C
SEC22						YML133W-A
SER1						YML133W-B
SER2						YMR013C-A
SIN4						YMR046W-A
SKY1						YNL339W-A
SLI15						YNL339W-B
SMC6						YOL155W-A
SNF1						YOR335W-A
SNF2						YOR396C-A
SOR1						YPL283W-A
SOR2						YPL283W-B
SPC72						YPR203W
SRB5						YPR204C-A
SWI3						YPR204W
TAF14						YRF1-1
TAF2						YRF1-3
TAR1						YRF1-5
TEF1						YRF1-6
TEF2						YRF1-7
THO2						YRF1-8
THP1						ZRT1
TIF3
TOF1
TOP3
TPD3
TPS2
TRK1
TUP1
VBA3
VMA1
VMA10
VMA11
VMA2
VMA22
VMA4
VMA5
VMA6
VMA8
VPH1
VPS15
VPS33
VPS36
VPS4
VPS41
VPS45
VPS52
VTH1
VTH2
XRN1
YAL037C-B
YAR060C
YAR066W
YAR069C
YBL111C
YBL112C
YBR121C-A
YCL065W
YCL068C
YCL076W
YDR381C-A
YDR545C-A
YEL020C-B
YEL032C-A
YEL075C
YEL075W-A
YEL076C
YEL076C-A
YER023C-A
YER189W
YER190C-A
YER190C-B
YFL066C
YFL068W
YGL123C-A
YGL188C-A
YGL260W
YGR296C-A
YGR296C-B
YHL049C
YHR052W-A
YHR054C
YHR054W-A
YHR069C-A
YHR212C
YHR212W-A
YHR213W
YHR213W-A
YHR214C-D
YHR214W
YHR218W
YHR218W-A
YHR219C-A
YHR219W
YIL021C-A
YIL171W-A
YIL177C
YIL177W-A
YJL026C-A
YJL220W
YJL222W-A
YJL222W-B
YJL225C
YJL225W-A
YKL145W-A
YLL066C
YLL066W-A
YLL067C
YLL067W-A
YLR154C-G
YLR154C-H
YLR154W-A
YLR154W-B
YLR154W-E
YLR154W-F
YLR156C-A
YLR156W
YLR157C-C
YLR157W-D
YLR157W-E
YLR159C-A
YLR159W
YLR161W
YLR163W-A
YLR347W-A
YLR399W-A
YLR462W
YLR463C
YLR466C-A
YLR467C-A
YML133C
YML133W-A
YML133W-B
YMR013C-A
YMR046W-A
YMR141W-A
YNL033W
YNL339W-A
YNL339W-B
YOL155W-A
YOR073W-A
YOR335W-A
YOR396C-A
YPL283W-A
YPL283W-B
YPR202W
YPR203W
YPR204C-A
YPR204W
YRF1-1
YRF1-2
YRF1-3
YRF1-4
YRF1-5
YRF1-6
YRF1-7
YRF1-8
ZAP1
ZRT1
