# Supplementary material for: Functional mapping of yeast genomes by saturated transposition
Source: eLife. 2017 May 8;6:e23570. doi: 10.7554/eLife.23570 (PMC5466422; doi:10.7554/eLife.23570)
Supplement: Supplementary file 3. — DOI: http://dx.doi.org/10.7554/eLife.23570.025 [file elife-23570-supp3.xlsx]

## Sheet: mmm1Vps13Sup vs. rest
positively selected						gene	fold_change	student_ttest
gene	fold_change	student_ttest				YAL069W	1.2463	0.10713
MDM10	4.842	0.044935				YAL068W-A	1.5664	0.29616
YLR302C	4.1346	0.05595				PAU8	0	0.015766
MET17	6.8638	0.077486				YAL067W-A	0.82696	0.57942
MDM12	4.5827	0.019889				SEO1	0.94394	0.55603
negatively selected						YAL066W	0.76431	0.51733
gene	fold_change	student_ttest				YAL065C	0.92191	0.52508
SAF1	0.33589	0.00029785				YAL064W-B	0.54589	0.26021
VAM6	0.17489	0.1198				TDA8	1.235	0.30516
MET6	0.17031	0.17247				YAL064W	1.6355	0.16174
OXA1	0.2653	0.23663				YAL063C-A	1.1782	0.72187
FAR7	0.3253	0.16245				FLO9	0.89832	0.59532
SCS3	0.42791	0.1213				GDH3	1.028	0.84367
VPS29	0.28769	0.023493				BDH2	1.0792	0.54009
PEP8	0.30301	0.25272				BDH1	0.95988	0.68921
STE24	0.26985	0.003193				YAL059C-A	0.87893	0.51059
CCE1	0.56213	0.08895				ECM1	1.0121	0.94885
MIC60	0.46289	0.1494				CNE1	1.0576	0.74669
VPS13	0.035782	0.028721				YAL056C-A	1.0604	0.7469
MMM1	0.060322	0.0064311				GPB2	1.001	0.99613
MMR1	0.38358	0.068771				PEX22	0.92731	0.78442
IRC20	0.38959	0.061702				ACS1	1.0344	0.82788
YPT7	0.10289	0.086158				FLC2	0.90373	0.51623
ERG5	0.35827	0.066831				OAF1	0.93619	0.46875
FAR11	0.398	0.075669				AIM2	1.1427	0.44937
TOM70	0.086055	0.0017386				GEM1	1.1335	0.062195
IDH1	0.36346	0.017403				YAL047W-A	0.75278	0.36076
ARE2	0.39814	0.01799				SPC72	1.1988	0.4703
MIM1	0.1014	0.073145				AIM1	0.74802	0.3254
TLG2	0.32596	0.14864				YAL045C	1.1151	0.61586
MCP1	0.057081	0.013425				YAL044W-A	1.0277	0.93465
ENV9	0.3186	0.015472				GCV3	1.0444	0.75943
						PTA1	1.5338	0.15079
						YAL042C-A	1.0383	0.82755
						ERV46	1.0245	0.84282
						CDC24	0.80759	0.52933
						CLN3	1.2445	0.29907
						CYC3	0.91963	0.85172
						CDC19	1.7608	0.28737
						YAL037C-B	1.7498	0.29551
						YAL037C-A	0.73966	0.22714
						YAL037W	0.98192	0.88017
						RBG1	1.0821	0.57541
						FUN12	1.201	0.71038
						YAL034C-B	1.171	0.41053
						MTW1	1.2004	0.10764
						FUN19	0.95655	0.58128
						POP5	1.0167	0.96918
						PRP45	0.84426	0.44051
						YAL031W-A	1.5343	0.0081679
						GIP4	1.1991	0.077179
						SNC1	0.97512	0.93696
						MYO4	1.0505	0.61688
						FRT2	1.1002	0.31974
						SAW1	1.2868	0.13229
						YAL026C-A	1.2622	0.47785
						DRS2	1.3303	0.40737
						MAK16	1.3063	0.71203
						LTE1	0.6541	0.29301
						PMT2	1.1239	0.49669
						FUN26	1.0599	0.57224
						CCR4	0.87205	0.63953
						ATS1	1.3228	0.087166
						YAL019W-A	1.0496	0.68509
						FUN30	1.1838	0.12852
						LDS1	1.3233	0.13001
						PSK1	0.94258	0.23951
						YAL016C-B	0.75819	0.37564
						YAL016C-A	0.93047	0.74798
						TPD3	2.0032	0.1115
						NTG1	1.1118	0.49331
						SYN8	1.2525	0.17378
						DEP1	1.1254	0.33159
						CYS3	2.2461	0.23209
						SWC3	1.2377	0.24855
						MDM10	4.842	0.044935
						SPO7	1.3216	0.078976
						FUN14	0.90195	0.56198
						ERP2	0.97574	0.57867
						SSA1	0.99642	0.97963
						YAL004W	1.098	0.71635
						EFB1	0	0.42127
						VPS8	0.98677	0.95956
						TFC3	1.141	0.48153
						NUP60	1.1953	0.36338
						ERP1	1.3093	0.085912
						SWD1	1.5413	0.072694
						RFA1	1.2043	0.50981
						SEN34	1.0458	0.91203
						BUD14	0.95154	0.37605
						ADE1	0	0.3153
						KIN3	1.1762	0.36739
						CDC15	2.5094	0.015813
						YAR019W-A	1.245	0.06307
						PAU7	1.1007	0.73858
						YAR023C	1.1122	0.30783
						UIP3	0.81702	0.46113
						YAR028W	1.0753	0.82108
						YAR029W	1.4751	0.40733
						YAR030C	1.205	0.38683
						PRM9	1.0229	0.92832
						MST28	1.0697	0.73097
						YAT1	1.0908	0.28519
						YAR035C-A	1.5195	0.057757
						SWH1	1.0122	0.93042
						YAR047C	1.4804	0.49227
						FLO1	0.81274	0.029861
						YAR053W	1.3086	0.43102
						YAR060C	NaN	NaN
						YAR064W	1.0344	0.87633
						YAR066W	0	0.31359
						YAR068W	1.8965	0.30087
						YAR069C	NaN	NaN
						YAR070C	0.69347	0.65365
						PHO11	0.90146	0.88483
						IMD1	0.69996	0.5046
						YAR075W	0.83339	0.63831
						YBL113C	1.5538	0.046748
						YBL113W-A	2.2883	0.39637
						YBL112C	NaN	NaN
						YBL111C	0	0.34742
						YBL109W	1.6282	0.033224
						PAU9	0	0.72097
						YBL108W	1.0601	0.84572
						YBL107W-A	0	0.44569
						MIX23	1.222	0.29538
						SRO77	1.0919	0.5971
						PKC1	2.3058	0.07717
						SEA4	0.98302	0.94529
						RTG3	1.1476	0.67877
						SFT2	0.85722	0.74228
						ECM21	1.095	0.45664
						YBL100W-C	0.76754	0.61063
						YBL100C	1.8225	0.50005
						ATP1	0.30897	0.55407
						BNA4	0.65094	0.13391
						BRN1	1.2166	0.29413
						YBL096C	0.70483	0.36049
						YBL095W	0.71557	0.15607
						YBL094C	0.71211	0.44253
						ROX3	0.95248	0.89379
						RPL32	Inf	0
						SCS22	0.66679	0.3966
						MAP2	1.057	0.83948
						MRP21	1.0757	0.89503
						AVT5	1.1395	0.37
						TEL1	0.82974	0.34632
						RPL23A	1.2499	0.098595
						YBL086C	0.90731	0.71268
						BOI1	1.0147	0.89528
						CDC27	1.0326	0.89294
						YBL083C	1.1805	0.65408
						ALG3	0.7498	0.22717
						YBL081W	0.89979	0.67886
						PET112	0.80469	0.78734
						NUP170	1.153	0.6481
						ATG8	1.8102	0.29731
						YBL077W	1.091	0.69059
						ILS1	0	0.45844
						SSA3	0.88054	0.31715
						AAR2	1.0422	0.85819
						YBL073W	0.61962	0.010361
						RPS8A	1.2977	0.56873
						YBL071C-B	0.85733	0.73406
						KTI11	0.9366	0.92792
						YBL071C	1.0063	0.98292
						YBL070C	1.4183	0.39996
						AST1	0.86399	0.60496
						YBL068W-A	0.93299	0.93993
						PRS4	1.0026	0.99174
						UBP13	0.95586	0.69699
						SEF1	0.72809	0.20696
						YBL065W	0.95799	0.91849
						PRX1	1.0144	0.96316
						KIP1	0.97759	0.84414
						YBL062W	0.58793	0.35572
						SKT5	0.9103	0.71082
						YEL1	0.96284	0.80519
						CMC2	0.63623	0.64359
						YBL059W	0.65396	0.26622
						SHP1	0.53123	0.20374
						PTH2	1.1311	0.55194
						PTC3	0.79747	0.50536
						YBL055C	0.83728	0.36729
						TOD6	0.97187	0.89932
						YBL053W	0.89324	0.73715
						SAS3	0.90114	0.37184
						PIN4	0.89914	0.78314
						SEC17	0	0.59046
						MOH1	1.4772	0.20173
						RRT1	1.2164	0.54551
						EDE1	0.99561	0.98337
						PSY4	1.1492	0.36452
						COR1	0.98655	0.97911
						YBL044W	1.1006	0.16694
						ECM13	1.2851	0.28328
						FUI1	1.1437	0.45926
						PRE7	0	0.57905
						ERD2	1.1016	0.71094
						YBL039W-B	0.64238	0.5605
						URA7	1.0324	0.63415
						YBL039C-A	2.8577	0.067596
						MRPL16	0.68204	0.53938
						APL3	1.1495	0.23115
						YBL036C	0.94912	0.73419
						POL12	1.6213	0.072789
						STU1	0.70916	0.24978
						RIB1	0.60257	0.27848
						HEK2	1.1751	0.61555
						SHE1	0.79096	0.51326
						PET9	1.0789	0.91304
						YBL029C-A	1.0635	0.81066
						YBL029W	1.2004	0.28263
						YBL028C	0.68615	0.28386
						RPL19B	1.7051	0.15128
						LSM2	1.3774	0.73425
						RRN10	1.9006	0.10396
						NCL1	0.85431	0.17785
						MCM2	1.1779	0.496
						PIM1	0.76618	0.66005
						HAP3	1.167	0.12251
						RFT1	1.4336	0.27337
						APN2	1.0049	0.95875
						POP8	0.96764	0.89445
						PEP1	0.95172	0.6678
						FUS3	0.98619	0.92969
						ACH1	0.84965	0.47391
						RRN6	0.81312	0.064528
						FMT1	1.0663	0.7678
						YBL012C	1.0425	0.85409
						SCT1	0.8874	0.36774
						YBL010C	1.0542	0.69942
						ALK2	0.9937	0.94291
						YBL008W-A	1.1126	0.61064
						HIR1	0.95283	0.61523
						SLA1	1.2521	0.50576
						LDB7	1.2832	0.31639
						YBL006W-A	1.3411	0.24587
						PDR3	0.93863	0.66076
						UTP20	0.54495	0.21475
						HTA2	1.2101	0.40429
						HTB2	1.0919	0.603
						ECM15	1.0574	0.84196
						NTH2	1.0518	0.79294
						RER2	1.4649	0.22947
						COQ1	0.85429	0.78395
						GPI18	0	0.19046
						RCR1	0.93703	0.70714
						UGA2	1.3133	0.023534
						DSF2	1.0054	0.96849
						FLR1	1.0323	0.74961
						HHF1	1.6088	0.19228
						HHT1	0.97183	0.88447
						IPP1	0.75932	0.51768
						YBR012C	0.71719	0.16617
						YBR013C	1.128	0.42178
						GRX7	0.94348	0.82286
						MNN2	0.97644	0.82222
						YBR016W	1.0076	0.96681
						KAP104	0.8235	0.50307
						GAL7	0	0.33985
						GAL10	1.247	0.50615
						GAL1	0.75561	0.60554
						FUR4	0.9225	0.7373
						POA1	1.2262	0.18438
						CHS3	0.85959	0.52132
						SCO2	1.0556	0.76673
						OLA1	0.72724	0.34039
						ETR1	0.93065	0.62256
						YBR027C	0.93086	0.7502
						YPK3	1.2682	0.1264
						CDS1	1.7612	0.26122
						RKM3	1.0737	0.72934
						RPL4A	1.2604	0.61968
						YBR032W	0.7273	0.29557
						EDS1	1.0268	0.88442
						HMT1	0.99406	0.98332
						PDX3	0.14679	0.040961
						CSG2	0.24344	0.39197
						SCO1	0.96121	0.94562
						CHS2	1.9493	0.1085
						ATP3	0.57662	0.68309
						FIG1	1.133	0.69604
						FAT1	0.82085	0.24575
						CST26	0.81687	0.15598
						QDR3	1.0238	0.8895
						TCM62	0.91614	0.51912
						GIP1	1.2777	0.064665
						ZTA1	1.3872	0.025678
						FMP23	1.023	0.83326
						RPS11B	1.2999	0.3908
						REB1	2.4816	0.05238
						REG2	1.0283	0.83898
						YBR051W	1.4817	0.096234
						RFS1	0.74935	0.29708
						YBR053C	1.0727	0.57974
						YRO2	0.99289	0.97207
						PRP6	1.402	0.15369
						YBR056W	0.86949	0.54459
						YBR056W-A	1.313	0.47113
						YBR056C-B	1.4875	0.22934
						MUM2	0.55406	0.05784
						UBP14	0.71803	0.22704
						TSC3	0.97026	0.96907
						AKL1	0.99736	0.98418
						ORC2	1.1862	0.58568
						TRM7	1.531	0.096679
						YBR062C	0.41008	0.035359
						YBR063C	0.75923	0.12133
						YBR064W	0.85171	0.5732
						ECM2	0.86675	0.10245
						NRG2	0.88678	0.7603
						TIP1	0.88382	0.73659
						BAP2	0.84379	0.80295
						TAT1	1.9059	0.12536
						ALG14	0	0.72097
						YBR071W	0.63036	0.06132
						HSP26	1.1184	0.74304
						YBR072C-A	1.2456	0.22177
						RDH54	1.0304	0.88506
						PFF1	0.93228	0.58311
						ECM8	0.78963	0.56245
						YBR076C-A	0.64647	0.13666
						SLM4	0.97292	0.91773
						ECM33	1.0031	0.98749
						RPG1	1.0578	0.86211
						SEC18	1.0695	0.93243
						SPT7	0.91666	0.81315
						UBC4	1.6692	0.10852
						TEC1	1.1708	0.41976
						MIS1	0.93415	0.49271
						RPL19A	1.1775	0.472
						AAC3	0.45783	0.13001
						YBR085C-A	1.5376	0.035096
						IST2	0.74425	0.27184
						RFC5	2.1753	0.53407
						POL30	5.783	0.039499
						YBR089W	0	0.72097
						NHP6B	1.0034	0.98598
						YBR090C	1.274	0.3568
						TIM12	NaN	NaN
						PHO3	0.67033	0.0090975
						PHO5	0.97801	0.93489
						PBY1	1.0682	0.62465
						RXT2	0.6417	0.2767
						YBR096W	0.92534	0.58954
						VPS15	1.0064	0.9787
						MMS4	0.82702	0.32035
						YBR099C	0.70478	0.35532
						FES1	1.1027	0.76516
						EXO84	1.2103	0.50966
						SIF2	1.1127	0.72164
						YBR103C-A	0.92988	0.69399
						YMC2	0.88027	0.39163
						VID24	0.97038	0.90084
						PHO88	1.2076	0.48317
						IML3	1.1703	0.72414
						AIM3	0.87197	0.32369
						CMD1	0	0.57643
						YBR109W-A	0.71016	0.543
						ALG1	0	0.36768
						YSA1	1.1156	0.71645
						SUS1	0.46005	0.39658
						CYC8	0.89572	0.74506
						YBR113W	0.69263	0.54124
						RAD16	0.76251	0.035508
						LYS2	0.42118	0.44765
						YBR116C	0.73724	0.22604
						TKL2	0.88437	0.44129
						TEF2	2.3848	0.20799
						MUD1	0.52329	0.24036
						CBP6	1.7047	0.18966
						GRS1	0	0.72097
						YBR121C-A	NaN	NaN
						MRPL36	0.5547	0.21308
						TFC1	0.21309	0.22169
						YBR124W	0.92403	0.6065
						PTC4	0.86324	0.40718
						TPS1	1.9741	0.17322
						YBR126W-A	0.85462	0.59437
						YBR126W-B	1.0645	0.81371
						VMA2	0.74696	0.40132
						ATG14	0.82179	0.61919
						OPY1	0.62353	0.19091
						SHE3	1.3247	0.38756
						CCZ1	0.54937	0.50195
						YBR131C-A	0	0.72097
						AGP2	1.1525	0.53687
						HSL7	1.2079	0.38523
						YBR134W	0.80016	0.36259
						CKS1	0.70792	0.66875
						MEC1	1.6746	0.24881
						YBR137W	0.62684	0.040094
						YBR138C	1.0178	0.92018
						YBR139W	0.57784	0.25373
						IRA1	0.91859	0.75707
						BMT2	1.3349	0.17575
						YBR141W-A	2.3375	0.020498
						MAK5	0.43198	0.38797
						SUP45	0	0.72097
						YBR144C	1.0642	0.8433
						ADH5	0.83505	0.24149
						MRPS9	1.4462	0.60934
						RTC2	0.60005	0.14984
						YSW1	1.2066	0.33965
						ARA1	0.7311	0.27306
						TBS1	1.1265	0.7058
						APD1	1.0522	0.78226
						SPP381	1.122	0.70826
						RIB7	0	0.34229
						RPB5	0	0.57737
						CNS1	2.1096	0.20375
						SLI15	0.79249	0.74041
						ICS2	1.0307	0.88181
						AMN1	0.99463	0.97886
						IFA38	0.65286	0.75445
						CDC28	0	0.44054
						CSH1	1.04	0.91429
						TOS1	0.87548	0.65429
						YSY6	0	0.13041
						EXO5	0.95691	0.94745
						ARL1	0.59313	0.40586
						UBS1	0.85222	0.73372
						TYR1	1.1373	0.84979
						POP7	0	0.72097
						PEX32	1.0055	0.98477
						SSE2	0.72403	0.17192
						NPL4	0.52383	0.02198
						SEC66	1.0277	0.95096
						SMY2	0.7601	0.36995
						UMP1	0.91976	0.92392
						YBR174C	0.93159	0.79138
						SWD3	1.8489	0.13641
						ECM31	0.92746	0.70496
						EHT1	0.80114	0.38357
						YBR178W	1.0395	0.85052
						FZO1	0.72954	0.68514
						DTR1	0.8231	0.46602
						RPS6B	1.5459	0.22491
						SMP1	1.0128	0.956
						YBR182C-A	0.76203	0.58679
						YPC1	0.85456	0.77264
						YBR184W	0.74417	0.17891
						MBA1	0.72229	0.45197
						PCH2	1.0765	0.68792
						GDT1	0.58468	0.27233
						NTC20	1.0279	0.90068
						RPS9B	1.9948	0.088289
						YBR190W	1.2563	0.54531
						RPL21A	1.2044	0.86306
						YBR191W-A	1.4002	0.8274
						RIM2	0.88685	0.90547
						MED8	0.78695	0.83322
						AIM4	0.66833	0.37917
						MSI1	0.636	0.20248
						PGI1	0	0.72097
						YBR196C-A	0.86102	0.42613
						YBR196C-B	0.66727	0.30511
						YBR197C	1.0013	0.99613
						TAF5	1.0557	0.97319
						KTR4	0.8801	0.62717
						BEM1	0.47001	0.24066
						YBR200W-A	1.4667	0.6531
						DER1	1.661	0.17595
						YBR201C-A	0.65887	0.39854
						MCM7	0.76889	0.64118
						COS111	0.47055	0.030529
						LDH1	0.96748	0.87708
						KTR3	0.95467	0.84483
						YBR206W	1.1412	0.56297
						FTH1	0.81152	0.34553
						DUR1%2C2	0.72803	0.21027
						YBR209W	0.99544	0.95035
						ERV15	0.96982	0.9289
						AME1	1.0463	0.8757
						NGR1	1.1853	0.1981
						MET8	0.85529	0.56623
						SDS24	0.95397	0.81522
						HPC2	0.74844	0.50262
						YBP1	0.76895	0.34881
						ATG12	0.7128	0.22097
						PYC2	1.1064	0.063722
						YBR219C	0.92128	0.40146
						YBR220C	0.76282	0.03949
						PDB1	0.95757	0.87332
						YBR221W-A	0.81285	0.22603
						PCS60	1.1018	0.40861
						TDP1	1.0769	0.44204
						YBR223W-A	0.74631	0.41494
						YBR224W	0.80505	0.519
						YBR225W	1.0571	0.85416
						YBR226C	0.86891	0.76447
						MCX1	0.97578	0.92237
						SLX1	0.81115	0.45041
						ROT2	0.85356	0.57954
						OM14	1.4671	0.40893
						YBR230W-A	0.53337	0.22878
						SWC5	0.85186	0.70282
						YBR232C	1.0698	0.78792
						PBP2	1.2255	0.23761
						DAD3	6.7956	0.080043
						ARC40	0	0.72097
						VHC1	0.86234	0.53229
						ABD1	0	0.23145
						PRP5	0.60462	0.72506
						YBR238C	0.71174	0.22249
						ERT1	0.73718	0.013908
						THI2	1.3464	0.24198
						YBR241C	1.0874	0.77378
						YBR242W	1.094	0.7765
						ALG7	2.0889	0.46451
						GPX2	0.81854	0.59325
						ISW1	0.94976	0.83447
						RRT2	1.0685	0.84933
						ENP1	0.96085	0.96898
						HIS7	0.87001	0.59244
						ARO4	0.57018	0.018648
						SPO23	0.73567	0.15819
						MRPS5	0.6374	0.5157
						DUT1	0	0.50447
						SRB6	0.64634	0.53711
						TRS20	0	0.44968
						MTC4	1.1234	0.67563
						YBR255C-A	1.0423	0.93317
						RIB5	1.0838	0.90332
						POP4	0	0.57614
						SHG1	0.65016	0.27856
						YBR259W	0.83044	0.018924
						RGD1	1.4942	0.013176
						TAE1	0.87598	0.49837
						MIC12	0.25699	0.024846
						SHM1	1.2347	0.070339
						YPT10	1.174	0.44054
						TSC10	1.5204	0.46972
						REI1	0.95366	0.87931
						SLM6	1.828	0.28903
						MRPL37	0.85723	0.88846
						FMP21	0.42731	0.12229
						BIT2	1.1138	0.71172
						EFM2	0.92107	0.81318
						HSM3	1.252	0.24559
						UBX7	0.83584	0.69112
						CHK1	1.497	0.12322
						RIF1	0.9804	0.91885
						PPS1	1.2392	0.19549
						YBR277C	1.4794	0.098195
						DPB3	1.1115	0.76608
						PAF1	0.6963	0.15186
						SAF1	0.33589	0.00029785
						DUG2	1.2491	0.19657
						MRPL27	0.56105	0.55966
						SSH1	0.93956	0.68218
						YBR284W	1.0263	0.79921
						YBR285W	0.56156	0.55723
						APE3	0.64837	0.10459
						YBR287W	0.92494	0.65804
						APM3	0.99902	0.99734
						SNF5	0.91351	0.70207
						BSD2	0.95538	0.8682
						CTP1	1.1679	0.11684
						YBR292C	1.0631	0.83738
						VBA2	0.86056	0.52003
						SUL1	0.91293	0.47148
						PCA1	1.3737	0.073289
						PHO89	0.91318	0.67037
						YBR296C-A	1.4542	0.34515
						MAL33	1.0416	0.82767
						MAL31	1.105	0.80267
						YBR298C-A	0.97202	0.93419
						MAL32	0.80228	0.57515
						YBR300C	1.3516	0.48574
						PAU24	0.54715	0.39686
						COS2	1.8025	0.69563
						YCL076W	1.5478	0.51454
						GEX1	1.0245	0.95884
						VBA3	0.53396	0.61781
						YCL068C	2.4451	0.18394
						HMLALPHA2	NaN	NaN
						HMLALPHA1	NaN	NaN
						YCL065W	0	0.72097
						CHA1	1.8247	0.16167
						VAC17	1.0252	0.89986
						MRC1	1.2098	0.49336
						KRR1	0.30957	0.30973
						FYV5	0.93727	0.83904
						ADF1	0.99992	0.99991
						MIC10	0.78688	0.71118
						PRD1	1.3949	0.13112
						PEX34	0.60642	0.31098
						KAR4	0.78201	0.30595
						SPB1	0.94188	0.91428
						PBN1	1.1236	0.60564
						LRE1	1.0408	0.83427
						APA1	0.60609	0.056831
						YCL049C	0.97068	0.87049
						YCL048W-A	0.73914	0.49281
						SPS22	0.93582	0.81206
						POF1	1.2309	0.16511
						EMC1	0.91188	0.75081
						YCL046W	1.5882	0.19114
						MGR1	0.56608	0.083699
						PDI1	0.35873	0.48533
						YCL041C	1.1959	0.41267
						YCL042W	1.0981	0.70018
						GLK1	0.91729	0.42095
						GID7	0.86019	0.44261
						ATG22	1.0248	0.85593
						SRO9	0.85915	0.32443
						GFD2	1.1999	0.2648
						GRX1	1.6805	0.030132
						LSB5	0.97448	0.88899
						MXR2	1.0197	0.94839
						STE50	1.0659	0.64211
						RRP7	2.2586	0.14413
						HIS4	1.0147	0.92315
						BIK1	1.2112	0.30105
						RNQ1	1.0603	0.63741
						FUS1	1.1072	0.33092
						HBN1	1.0621	0.78139
						FRM2	1.0381	0.74013
						AGP1	0.87105	0.18909
						YCL023C	0.97706	0.89857
						KCC4	1.0831	0.42338
						YCL022C	1.1753	0.22976
						YCL021W-A	0.93425	0.53601
						LEU2	NaN	NaN
						NFS1	0.5267	0.63083
						DCC1	1.1674	0.44303
						BUD3	1.0994	0.35317
						YCL012C	1.2647	0.22735
						GBP2	1.2065	0.13532
						SGF29	0.95324	0.88027
						ILV6	1.112	0.4425
						STP22	1.0659	0.78773
						YCL007C	1.1688	0.40612
						VMA9	1.6836	0.31569
						LDB16	0.89134	0.68307
						PGS1	0.63996	0.56146
						YCL002C	1.2236	0.25703
						RER1	1.2455	0.63163
						YCL001W-A	1.3779	0.50394
						YCL001W-B	0.94155	0.7702
						YCR001W	1.0492	0.78839
						CDC10	0.70374	0.61028
						MRPL32	0.96382	0.91439
						YCP4	1.1286	0.6006
						CIT2	1.1432	0.3429
						YCR006C	1.1575	0.57975
						YCR007C	1.1519	0.54169
						SAT4	0.80654	0.2358
						RVS161	0.59118	0.37811
						ADY2	0.99503	0.98019
						ADP1	0.93231	0.39644
						PGK1	2.0678	0.25782
						YCR013C	1.1229	0.70492
						POL4	1.132	0.16554
						YCR015C	0.91917	0.66784
						YCR016W	1.2282	0.2459
						CWH43	1.0782	0.60635
						SRD1	1.5076	0.090067
						YCR018C-A	1.059	0.8108
						MAK32	0.82621	0.16604
						PET18	0.84482	0.48427
						MAK31	1.1136	0.813
						HTL1	1.6425	0.45249
						HSP30	0.95749	0.69301
						YCR022C	0.79977	0.065956
						YCR023C	0.95201	0.60334
						SLM5	0.79169	0.73588
						YCR024C-B	0.78341	0.42929
						PMP1	0.70623	0.25339
						YCR025C	1.0058	0.97131
						NPP1	0.83936	0.16489
						RHB1	1.0187	0.96181
						FEN2	1.8345	0.041986
						RIM1	0.76662	0.79836
						SYP1	0.85534	0.49058
						RPS14A	1.208	0.60254
						BPH1	0.80198	0.20788
						SNT1	0.82624	0.54012
						ELO2	0.95103	0.91746
						RRP43	0	0.44618
						RBK1	1.0027	0.96967
						PHO87	1.0067	0.97014
						BUD5	1.216	0.63521
						YCR038W-A	0.92752	0.84797
						MATALPHA2	0.91183	0.93384
						MATALPHA1	NaN	NaN
						YCR041W	0.38581	0.31713
						TAF2	0.53092	0.26199
						YCR043C	1.0417	0.8903
						PER1	0	0.23264
						RRT12	1.0686	0.55504
						YCR045W-A	1.4523	0.10086
						IMG1	1.0429	0.93326
						BUD23	0.97279	0.93981
						YCR047W-A	1.281	0.84233
						YCR049C	1.2909	0.069541
						ARE1	1.1537	0.28727
						YCR050C	1.6486	0.014844
						YCR051W	1.3235	0.224
						RSC6	1.1687	0.71332
						THR4	0.97232	0.93414
						CTR86	0.9586	0.92149
						PWP2	1.1573	0.71206
						YIH1	1.0294	0.88643
						TAH1	0.64776	0.4805
						YCR061W	0.85406	0.249
						YCR064C	0.93505	0.73881
						BUD31	1.0718	0.86767
						HCM1	1.2538	0.027038
						RAD18	1.3655	0.41292
						SED4	0.84832	0.2558
						ATG15	0.77992	0.13624
						CPR4	1.1683	0.45468
						IMG2	0.72223	0.73241
						RSA4	NaN	NaN
						SSK22	0.9534	0.74738
						SOL2	0.83834	0.33708
						ERS1	1.1423	0.50563
						YCR075W-A	0.67977	0.5386
						FUB1	1.0653	0.84525
						PAT1	0.661	0.37849
						PTC6	0.83194	0.40885
						SRB8	1.5617	0.56769
						YCR081C-A	0.31407	0.55562
						AHC2	1.4175	0.34003
						TRX3	0.80878	0.45095
						TUP1	0.3074	0.23625
						YCR085W	1.2919	0.37466
						CSM1	1.0124	0.97499
						YCR087W	0.99231	0.97517
						YCR087C-A	0.88188	0.67321
						ABP1	0.84519	0.16807
						FIG2	0.91485	0.6332
						YCR090C	1.0617	0.84643
						KIN82	0.80013	0.2538
						MSH3	1.1771	0.4622
						CDC39	0.60243	0.32328
						CDC50	0.74911	0.73643
						OCA4	0.62338	0.32608
						YCR095W-A	0.58172	0.61388
						HMRA2	NaN	NaN
						HMRA1	0.063201	0.20275
						YCR097W-A	1.1751	0.77722
						GIT1	0.73039	0.26695
						YCR099C	0.25396	0.15199
						YCR100C	0.91644	0.79713
						YCR101C	0.98529	0.97012
						YCR102C	0.91005	0.77788
						YCR102W-A	1.9149	0.3786
						PAU3	0.93725	0.81806
						ADH7	1.4796	0.059491
						RDS1	1.0515	0.85044
						AAD3	1.7284	0.048818
						YCR108C	1.2294	0.45388
						COS7	0.58714	0.47433
						YDL247W-A	0	0.72097
						MPH2	0.76675	0.83911
						SOR2	2.0281	0.40516
						HXT15	1.6478	0.35862
						THI13	0.70672	0.4768
						AAD4	1.005	0.98077
						YDL242W	1.2015	0.4918
						YDL241W	1.4232	0.39559
						YDL240C-A	1.0362	0.80935
						LRG1	0.99104	0.94367
						ADY3	1.1045	0.37096
						GUD1	0.7797	0.3625
						AIM6	1.0831	0.74247
						PHO13	1.2563	0.52651
						YPD1	0.43118	0.20132
						GYP7	0.93737	0.65888
						MFG1	1.4095	0.077958
						OST4	Inf	0
						BRE4	1.035	0.72663
						PTP1	1.069	0.82044
						SSB1	1.3047	0.23162
						YDL228C	0.83263	0.56732
						HO	1.3209	0.13655
						GCS1	0.92143	0.79024
						SHS1	1.3131	0.36784
						WHI4	1.323	0.44024
						HBT1	0.95719	0.72166
						FMP45	0.80405	0.65638
						YDL221W	0.98807	0.95365
						CDC13	1.0396	0.85422
						DTD1	1.832	0.29343
						YDL218W	0.91013	0.67689
						TIM22	0.60584	0.64913
						RRI1	0.93104	0.77295
						GDH2	0.84197	0.15383
						PRR2	0.77259	0.17133
						NOP6	0.9489	0.91544
						SHR3	3.0917	0.0070842
						YDL211C	0.92994	0.77865
						UGA4	1.1054	0.54619
						CWC2	0	0.35666
						NHP2	0.89357	0.70387
						GLE1	0.99007	0.9761
						YDL206W	1.0136	0.96753
						HEM3	1.4173	0.80172
						RTN2	0.93291	0.73285
						ACK1	0.8779	0.47843
						MRPL11	0.73355	0.67718
						TRM8	1.2604	0.097087
						MGT1	1.0161	0.96173
						YDL199C	1.3126	0.11735
						GGC1	1.044	0.94753
						ASF2	1.2262	0.35394
						YDL196W	0.96627	0.63142
						SEC31	2.4149	0.21879
						SNF3	0.78416	0.22383
						NUS1	1.4328	0.58211
						ARF1	1.506	0.20743
						RPL35A	0	0.42452
						UFD2	0.99223	0.98012
						RBS1	1.1558	0.61759
						PPH22	0.79634	0.46444
						YDL187C	0.99996	0.99991
						YDL186W	0.48721	0.094307
						YDL185C-A	0.37973	0.27627
						VMA1	1.3964	0.46197
						RPL41A	Inf	0
						YDL183C	0.88409	0.32254
						LYS20	0.79458	0.41059
						INH1	1.01	0.9735
						YDL180W	1.0094	0.9682
						PCL9	1.6204	0.09161
						DLD2	0.9157	0.66417
						YDL177C	1.4772	0.15367
						YDL176W	1.0479	0.6822
						AIR2	0.93695	0.67635
						DLD1	1.0595	0.67097
						PAR32	0.67504	0.22596
						YDL172C	0.52459	0.047238
						GLT1	0.99099	0.95488
						UGA3	0.99182	0.896
						UGX2	0.67162	0.16071
						SFA1	0.93918	0.85967
						NRP1	1.2811	0.35119
						FAP7	0	0.19443
						CDC36	0	0.063375
						CDC9	0.65594	0.39999
						YDL163W	0.71888	0.49603
						YDL162C	0.87415	0.15555
						ENT1	1.2487	0.22751
						MHF2	1.7359	0.15275
						DHH1	0.43956	0.2055
						YDL159W-A	1.2723	0.15228
						STE7	1.0003	0.99799
						YDL159C-B	0.64378	0.55179
						YDL158C	2.0907	0.089535
						YDL157C	1.0662	0.89064
						CMR1	1.1694	0.40216
						CLB3	0.77323	0.26899
						MSH5	0.84913	0.35624
						SAS10	1.5701	0.44932
						YDL152W	1.4235	0.10814
						BUD30	0.58693	0.61684
						RPC53	0.48642	0.54165
						ATG9	1.0393	0.90696
						NOP14	1.1187	0.5709
						RPN5	1.5625	0.54036
						LDB17	1.6707	0.028844
						COP1	1.8961	0.19171
						YDL144C	0.96514	0.88572
						CCT4	0	0.45244
						CRD1	0.86465	0.62002
						BPL1	0	0.14358
						RPO21	0.51542	0.18425
						SCM3	0.82814	0.84861
						RGT2	0.91921	0.68495
						ARF2	0.70826	0.057914
						RPL35B	1.0974	0.83628
						RDI1	0.91901	0.793
						PPH21	0.71548	0.020696
						RPL41B	2.488	0.26733
						SRF1	1.209	0.38026
						CDC53	1.3588	0.54753
						LYS21	0.63526	0.011125
						STF1	0.89626	0.75663
						RPP1B	1.1009	0.72981
						YDL129W	0.98482	0.94192
						VCX1	1.265	0.37852
						PCL2	0.74822	0.29187
						CDC48	0.60895	0.53625
						HNT1	1.1962	0.25676
						YDL124W	1.2869	0.070984
						SNA4	1.232	0.43265
						UBP1	0.683	0.2693
						YDL121C	0.75423	0.48034
						YFH1	0	0.43966
						YDL119C	1.0659	0.80025
						YDL118W	0.661	0.45453
						CYK3	0.79863	0.24333
						NUP84	0.73365	0.69923
						IWR1	0.64015	0.2152
						YDL114W-A	0	0.72097
						YDL114W	0.80956	0.34351
						ATG20	1.0481	0.83536
						TRM3	0.98643	0.84551
						RRP42	1.1854	0.69409
						TMA17	1.3711	0.28499
						YDL109C	1.1048	0.58089
						KIN28	1.5015	0.057467
						MSS2	0.64886	0.45514
						PHO2	0.9932	0.98782
						NSE4	0	0.29328
						QRI7	0.85793	0.49874
						QRI1	1.3193	0.5568
						POL3	1.2508	0.5626
						DUN1	1.3811	0.19821
						GET3	0.75602	0.46081
						BUG1	1.0595	0.79116
						SNU23	1.235	0.49232
						RPN6	0.71515	0.77693
						OPI6	1.0721	0.80106
						PMT1	0.93795	0.78474
						YDL094C	1.1207	0.57119
						PMT5	0.98825	0.80805
						SRP14	0.61314	0.26938
						UBX3	1.3256	0.10337
						RAM1	1.6657	0.26341
						NUR1	0.89592	0.4013
						ASM4	1.2744	0.17733
						LUC7	0.59101	0.21971
						YDL086W	1.2011	0.26289
						YDL086C-A	1.3739	0.12347
						YDL085C-A	0.69459	0.39862
						NDE2	1.4793	0.017244
						SUB2	1.0204	0.9765
						RPS16B	1.3081	0.34657
						RPL13A	1.2851	0.28578
						RPP1A	0.80127	0.7016
						THI3	0.68107	0.075692
						MRK1	1.1352	0.31345
						MDH3	0.91437	0.77522
						VAM6	0.17489	0.1198
						RXT3	1.1135	0.70257
						RPL31A	1.696	0.56389
						BRE1	0.33991	0.14176
						YDL073W	0.55088	0.095528
						YET3	0.53907	0.14244
						YDL071C	1.1317	0.63718
						BDF2	0.95554	0.84957
						CBS1	0.80827	0.7153
						YDL068W	0.90137	0.89269
						COX9	0	0.33169
						IDP1	1.0438	0.7829
						PEX19	1.0111	0.96727
						UBC9	0	0.57643
						SYO1	1.3009	0.34611
						YDL062W	1.4375	0.060584
						RPS29B	1.0754	0.91075
						TSR1	0.88833	0.91362
						RAD59	0.85859	0.58983
						USO1	0.89874	0.55141
						YDL057W	1.1707	0.48932
						MBP1	0.73404	0.15144
						PSA1	2.8543	0.15916
						MCH1	1.0509	0.59768
						PBP4	1.1952	0.54094
						SLC1	0.90564	0.6538
						LHP1	1.0469	0.83561
						YDL050C	1.0233	0.9542
						KNH1	0.8879	0.49175
						STP4	1.2256	0.047659
						SIT4	0.54858	0.24526
						NPC2	0.95677	0.836
						MRP10	0.43224	0.071261
						FAD1	1.7561	0.2742
						MTF2	1.2384	0.62907
						PRP11	1.43	0.33302
						SIR2	1.1471	0.1245
						YDL041W	1.0915	0.48971
						NAT1	0.9481	0.71688
						PRM7	0.95936	0.85329
						BSC1	0.74974	0.22444
						PUS9	0.80691	0.1657
						GPR1	0.78687	0.35146
						YDL034W	0.4928	0.23918
						SLM3	1.2889	0.10328
						YDL032W	0.8855	0.64159
						DBP10	1.1288	0.75098
						PRP9	0.89337	0.81009
						ARP2	1.7118	0.30324
						MPS1	0.8425	0.76029
						YDL027C	0.99489	0.98104
						YDL026W	1.0032	0.99532
						RTK1	0.90306	0.6545
						YDL025W-A	0.53938	0.62716
						DIA3	1.1694	0.24294
						YDL022C-A	0.89691	0.45251
						YDL023C	0.74838	0.19323
						GPD1	0.87921	0.18976
						GPM2	1.4666	0.012148
						RPN4	1.1986	0.29913
						OSH2	0.86276	0.18556
						ERP3	0.92384	0.71558
						CDC7	1.0799	0.8088
						YDL016C	1.3143	0.12284
						TSC13	6.7956	0.080043
						NOP1	6.7956	0.080043
						SLX5	0.79667	0.63558
						YDL012C	1.0004	0.99802
						YDL011C	1.2192	0.27319
						GRX6	1.0837	0.59439
						YDL009C	1.1711	0.5811
						APC11	1.0985	0.57461
						YDL007C-A	1.2141	0.26169
						RPT2	3.2669	0.061104
						PTC1	0.12742	0.23394
						MED2	1.0005	0.99834
						ATP16	1.2467	0.77799
						MCD1	1.2141	0.061855
						NHP10	1.0109	0.96721
						RMD1	1.0799	0.7145
						NTH1	1.0606	0.68109
						YRB1	0.85452	0.71292
						RCR2	1.1226	0.57691
						YDR003W-A	1.3776	0.22819
						RAD57	1.1635	0.2675
						MAF1	0.65573	0.35752
						SOK1	0.95134	0.82695
						TRP1	1.1497	0.53858
						YDR008C	1.258	0.40276
						GAL3	1.067	0.67679
						YDR010C	1.0397	0.8584
						SNQ2	0.97571	0.82226
						RPL4B	1.1967	0.26873
						PSF1	1.9451	0.41529
						RAD61	1.0189	0.89429
						HED1	0.65144	0.23654
						YDR015C	0.3329	0.16143
						DAD1	1.2471	0.75126
						KCS1	1.1449	0.11869
						YDR018C	1.012	0.89831
						GCV1	1.0334	0.508
						DAS2	0.85562	0.40433
						FAL1	0	0.20278
						ATG31	0.95557	0.84434
						SES1	0.83054	0.68087
						FYV1	1.2873	0.1583
						RPS11A	1.3918	0.48611
						NSI1	0.6523	0.024255
						VPS54	0.2083	0.15299
						REG1	0.91769	0.48348
						YDR029W	0.94064	0.88945
						RAD28	1.1931	0.35692
						MIX14	1.4858	0.34769
						PST2	1.0759	0.66383
						MRH1	0.62618	0.04206
						LYS14	0.75611	0.38704
						YDR034C-A	1.3784	0.50364
						YDR034W-B	1.0772	0.86662
						ARO3	1.0332	0.7399
						EHD3	1.0587	0.64493
						KRS1	1.018	0.97663
						ENA5	1.0416	0.87634
						ENA2	0	0.57934
						ENA1	1.0033	0.98904
						RSM10	1.3587	0.43787
						YDR042C	0.9941	0.98965
						NRG1	0.75134	0.20708
						HEM13	0	0.72097
						RPC11	1.5923	0.73878
						BAP3	1.1464	0.48674
						HEM12	0.68576	0.70993
						YDR048C	0.87214	0.31025
						VMS1	0.34133	0.42458
						TPI1	1.3702	0.69807
						DET1	1.3433	0.2743
						DBF4	0	0.295
						YDR053W	NaN	NaN
						CDC34	2.9612	0.00162
						PST1	1.1948	0.40284
						YDR056C	1.1684	0.34086
						YOS9	1.0514	0.82264
						TGL2	0.96926	0.87015
						UBC5	0.67203	0.32048
						MAK21	0.81709	0.50656
						YDR061W	0.98143	0.927
						LCB2	0.92294	0.96175
						AIM7	0.81027	0.13051
						RPS13	4.1476	0.1224
						RRG1	1.0406	0.95019
						RTR2	0.81809	0.38648
						OCA6	1.0662	0.84871
						DOS2	1.1279	0.65566
						DOA4	0.79789	0.735
						FMP16	1.1444	0.70403
						PAA1	1.8279	0.11993
						IPT1	1.0876	0.48139
						SNF11	1.1376	0.20077
						TPS2	0.86617	0.67684
						PPH3	1.3271	0.056039
						RAD55	1.3148	0.023243
						SED1	0.78623	0.51431
						SHU2	0.65245	0.18794
						PET100	1.0249	0.95016
						TFB5	0	0.33896
						VPS41	0.31454	0.38168
						PDC2	0.81732	0.87424
						STN1	1.2195	0.78077
						RRP8	0.94585	0.79475
						TVP23	1.0304	0.93528
						AFR1	0.94493	0.84424
						SSS1	2.4316	0.28431
						RRP1	0	0.35833
						SLU7	1.0206	0.89251
						YDR089W	0.97978	0.91663
						YDR090C	1.6416	0.03889
						RLI1	NaN	NaN
						UBC13	1.2563	0.61624
						DNF2	1.1212	0.25653
						YDR094W	0.92126	0.61818
						YDR095C	0.70328	0.30297
						GIS1	0.62965	0.23096
						MSH6	0.97337	0.73767
						GRX3	1.5222	0.199
						BMH2	1.2746	0.01935
						TVP15	0.68423	0.10159
						ARX1	0.88069	0.61462
						YDR102C	1.1876	0.27356
						STE5	0.89658	0.46521
						SPO71	0.93939	0.79395
						TMS1	0.93728	0.791
						ARP10	0.91084	0.67158
						TMN2	1.0936	0.6454
						TRS85	0.4572	0.10366
						YDR109C	0.72198	0.29821
						FOB1	1.1676	0.45785
						ALT2	1.0585	0.78742
						IRC2	0.54313	0.14309
						PDS1	0.72477	0.26975
						YDR114C	0.67056	0.22085
						YDR115W	0.55155	0.57483
						MRPL1	1.125	0.66875
						TMA64	0.77076	0.45405
						APC4	1.0136	0.95895
						YDR118W-A	0.852	0.64377
						VBA4	0.85956	0.11263
						COX26	0.96046	0.95248
						TRM1	0.81794	0.59082
						DPB4	0.91753	0.78541
						KIN1	1.0806	0.66122
						INO2	0.39711	0.71121
						YDR124W	0.92964	0.73353
						ECM18	1.2689	0.26816
						SWF1	0.92875	0.87368
						ARO1	1.1999	0.69761
						MTC5	0.8993	0.43704
						SAC6	1.9689	0.18108
						FIN1	0.90906	0.76588
						YDR131C	0.85549	0.41003
						YDR132C	1.2707	0.25898
						YDR133C	4.2456	0.019915
						YCF1	1.2696	0.23256
						VPS61	0.87023	0.57236
						RGP1	0.39421	0.40243
						HPR1	0.69138	0.48428
						RUB1	1.2665	0.62415
						MTQ2	0.59226	0.52577
						DOP1	1.4815	0.43699
						PEX7	1.0026	0.9935
						SAN1	0.99322	0.98676
						MKC7	0.9756	0.91267
						TAF12	0.62402	0.39665
						SWI5	1.0653	0.78326
						EKI1	0.97406	0.86833
						KGD2	0.70887	0.25053
						YDR149C	1.1562	0.74247
						NUM1	1.1545	0.46214
						CTH1	1.3534	0.35983
						GIR2	0.46924	0.067272
						ENT5	1.2922	0.31975
						YDR154C	1.2858	0.61115
						CPR1	0.54379	0.45045
						RPA14	1.1373	0.33543
						YDR157W	0.88382	0.59202
						HOM2	1.1016	0.77942
						SAC3	0.56453	0.060721
						SSY1	0	0.45647
						YDR161W	1.264	0.58188
						NBP2	0.34659	0.16837
						CWC15	1.0763	0.81842
						SEC1	0	0.3431
						TRM82	1.1965	0.28246
						SEC5	0.83969	0.052603
						TAF10	1.5854	0.26148
						CDC37	0.8177	0.78568
						STB3	0.98795	0.96349
						YDR169C-A	1.5383	0.24415
						SEC7	0.74861	0.63101
						HSP42	1.2841	0.32468
						SUP35	2.2167	0.27363
						ARG82	0	0.28303
						HMO1	1.0574	0.86717
						RSM24	0.53416	0.51079
						NGG1	0.9111	0.84891
						UBC1	0	0.33689
						SDH4	0.70669	0.53435
						CSN9	0.90896	0.81522
						YDR179W-A	0.77018	0.66223
						SCC2	1.6405	0.63025
						SAS4	1.2183	0.2082
						CDC1	2.2132	0.35563
						YDR182W-A	1.0638	0.83003
						PLP1	0.62493	0.14578
						YDR183C-A	1.1596	0.7828
						ATC1	0.97159	0.89335
						UPS3	0.5451	0.019267
						YDR186C	0.87168	0.78436
						YDR187C	1.389	0.24061
						CCT6	1.2161	0.71338
						SLY1	0	0.19767
						RVB1	Inf	0
						HST4	0.79205	0.43569
						NUP42	0.92873	0.63552
						YDR193W	0.90979	0.71302
						MSS116	0.51472	0.31691
						YDR194W-A	0.56681	0.5752
						REF2	0.71655	0.38962
						CAB5	0.7083	0.76358
						CBS2	0.5356	0.44735
						RKM2	0.87015	0.68707
						YDR199W	0.54428	0.22625
						VPS64	0.72988	0.35129
						SPC19	1.6057	0.41552
						RAV2	1.2308	0.56879
						YDR203W	0.48494	0.15153
						COQ4	0.6425	0.33686
						MSC2	1.1592	0.38591
						EBS1	0.85024	0.45529
						UME6	1.2592	0.40183
						MSS4	0.56579	0.18347
						YDR209C	0.92286	0.90069
						YDR210W	0.70452	0.76969
						GCD6	1.485	0.53599
						TCP1	0	0.57614
						UPC2	0.66514	0.12474
						AHA1	0.89878	0.79259
						YDR215C	1.1102	0.50357
						ADR1	1.138	0.58956
						RAD9	0.79761	0.62491
						SPR28	1.0494	0.87276
						MFB1	0.81625	0.69164
						YDR220C	1.3414	0.37483
						GTB1	1.0324	0.89932
						YDR222W	1.4989	0.21834
						CRF1	1.1627	0.414
						HTB1	1.2673	0.66673
						HTA1	0.95212	0.92427
						ADK1	0.92858	0.95763
						SIR4	0.81772	0.60722
						PCF11	1.1382	0.85853
						IVY1	0.85202	0.65438
						YDR230W	0.80633	0.24311
						COX20	0.5602	0.12632
						HEM1	1.0948	0.92361
						RTN1	1.3559	0.57264
						LYS4	0.22051	0.43723
						PRP42	2.3212	0.11928
						FMN1	0.73756	0.83683
						MRPL7	0.35731	0.40019
						SEC26	0.96355	0.98152
						YDR239C	0.89297	0.69001
						SNU56	0.76122	0.73719
						BUD26	0.99129	0.98309
						AMD2	1.002	0.99184
						PRP28	0	0.52199
						PEX5	0.90602	0.71974
						MNN10	1.6274	0.33957
						TRS23	0.93986	0.9281
						YDR246W-A	0.77867	0.25058
						VHS1	0.90572	0.78345
						YDR248C	0.59956	0.34708
						YDR249C	0.94569	0.82063
						YDR250C	1.7189	0.026281
						PAM1	1.2911	0.17212
						BTT1	0.20382	0.029674
						MET32	1.4936	0.30198
						CHL4	1.5907	0.13627
						RMD5	0.77412	0.5672
						CTA1	1.1011	0.68661
						RKM4	1.9795	0.048692
						HSP78	1.0374	0.92544
						YAP6	0.88455	0.69944
						SWM1	1.0126	0.92993
						EXG2	1.015	0.91871
						YDR262W	1.1956	0.66387
						DIN7	1.0417	0.83299
						AKR1	0.34911	0.34205
						PEX10	0.98945	0.97982
						HEL2	0.54823	0.050531
						CIA1	0	0.28611
						MSW1	0.6163	0.56159
						YDR269C	1.9649	0.20594
						CCC2	0.93264	0.81161
						YDR271C	1.107	0.68617
						GLO2	1.4651	0.2712
						DON1	0.98605	0.96509
						YDR274C	0.91487	0.56855
						BSC2	0.63326	0.25112
						PMP3	0.65768	0.6508
						MTH1	1.0775	0.76379
						YDR278C	0.95983	0.91882
						RNH202	1.2051	0.3084
						RRP45	0.70144	0.74253
						PHM6	1.0846	0.81756
						YDR282C	0.99916	0.9984
						GCN2	0.8202	0.38906
						DPP1	0.82986	0.39199
						ZIP1	0.66788	0.20799
						YDR286C	1.0404	0.92633
						INM2	0.52326	0.32964
						NSE3	1.2931	0.79338
						RTT103	0.76686	0.67676
						YDR290W	0.94238	0.90988
						HRQ1	1.0042	0.9877
						SRP101	1.2188	0.92208
						SSD1	0.84313	0.34787
						DPL1	1.0485	0.95496
						HDA2	1.0048	0.98845
						MHR1	0.79726	0.63846
						SUR2	0.23162	0.20697
						ATP5	0.36061	0.31823
						BFR2	1.3503	0.78336
						PRO1	0.82717	0.66675
						CFT1	2.853	0.27447
						GPI11	1.5113	0.64996
						RSC3	2.1043	0.25525
						CPR5	0.9538	0.91733
						HNT2	1.1581	0.68203
						YDR306C	0.80168	0.35027
						PMT7	0.84518	0.32471
						SRB7	1.4371	0.78188
						GIC2	0.75079	0.014779
						SUM1	1.0804	0.48455
						TFB1	0.77579	0.60546
						SSF2	0.93394	0.82232
						PIB1	0.75795	0.025515
						RAD34	0.97019	0.88209
						IPK1	1.0839	0.87778
						OMS1	0.76019	0.45471
						HIM1	0.89369	0.68991
						MCM21	1.2857	0.52032
						YFT2	1.4514	0.38922
						SWA2	1.2075	0.69868
						DAD4	0	0.72097
						YDR320W-B	1.4117	0.14425
						ASP1	1.0853	0.80578
						MRPL35	0.50623	0.41603
						TIM11	1.152	0.88791
						PEP7	0.89646	0.76616
						UTP4	1.5699	0.47193
						YCG1	0	0.10619
						YSP2	0.85899	0.48241
						YDR327W	2.012	0.16262
						SKP1	3.4433	0.070275
						PEX3	0.78083	0.54021
						UBX5	0.9681	0.84846
						GPI8	0	0.089283
						IRC3	0.74238	0.66623
						RQC1	0.771	0.18486
						SWR1	0.98044	0.97348
						MSN5	0.96715	0.85735
						YDR336W	0.63444	0.28515
						MRPS28	0.92402	0.92791
						YDR338C	0.77946	0.093518
						FCF1	1.2697	0.78957
						YDR340W	0.83261	0.55873
						YDR341C	0	0.4572
						HXT7	1.0715	0.93091
						HXT6	0.96665	0.95787
						YDR344C	1.0564	0.5994
						HXT3	1.088	0.78529
						SVF1	0.81075	0.33719
						MRP1	0.90828	0.91157
						PAL1	1.028	0.92417
						YPS7	0.88193	0.58395
						ATP22	1.1387	0.78619
						SBE2	0.79041	0.56736
						YPQ2	0.98571	0.94612
						TRR1	1.5179	0.53357
						TRP4	1.6056	0.23478
						YDR354C-A	6.564	0.021522
						YDR355C	NaN	NaN
						SPC110	0.63388	0.56839
						CNL1	0.97056	0.89419
						GGA1	0.67978	0.48522
						EAF1	0.55589	0.11391
						OPI7	1.3536	0.57036
						BCP1	3.0499	0.29852
						TFC6	1.2581	0.68071
						ESC2	1.2442	0.57284
						SEM1	2.2402	0.13484
						CDC40	1.3019	0.7614
						ESF1	2.0452	0.2601
						YDR366C	1.1279	0.45509
						KEI1	1.1351	0.87213
						YPR1	0.9202	0.7429
						XRS2	1.1292	0.54934
						DXO1	1.0186	0.91789
						CTS2	0.79563	0.46633
						YDR371C-A	0	0.48775
						VPS74	1.7409	0.45066
						FRQ1	0	0.44618
						PHO92	0.99484	0.98108
						WIP1	0	0.61823
						BCS1	1.0907	0.86633
						ARH1	1.5176	0.34438
						ATP17	0.73408	0.58113
						LSM6	0.59172	0.79547
						RGA2	0.70669	0.086813
						SDH6	0.62382	0.21742
						ARO10	0.79953	0.45101
						YRA1	1.125	0.88986
						YDR381C-A	1.3345	0.76304
						RPP2B	0.65683	0.53798
						NKP1	0.84058	0.41065
						ATO3	1.3698	0.12699
						EFT2	0.66414	0.72611
						MUS81	0.76049	0.29069
						YDR387C	0.88195	0.57694
						RVS167	0.47236	0.078467
						SAC7	0.98037	0.93949
						UBA2	0.87597	0.81411
						YDR391C	1.1014	0.72874
						SPT3	0.64095	0.23002
						SHE9	0.89036	0.45308
						RPT3	2.2803	0.50959
						SXM1	0.90162	0.74031
						YDR396W	0.74994	0.60421
						NCB2	0.87462	0.79677
						UTP5	0.73954	0.57479
						HPT1	0.96994	0.95388
						URH1	0.92602	0.80143
						YDR401W	1.0234	0.90576
						DIT2	1.1757	0.38944
						DIT1	0.7708	0.097686
						RPB7	0	0.72097
						MRP20	0.67141	0.49594
						PDR15	1.062	0.6967
						YDR406W-A	1.0392	0.91243
						TRS120	1.2645	0.63634
						ADE8	2.388	0.30841
						SIZ1	0.9081	0.65458
						STE14	1.1176	0.73669
						DFM1	0.96137	0.88668
						RRP17	2.1677	0.2007
						YDR413C	1.7138	0.51202
						ERD1	1.0905	0.62576
						YDR415C	1.2728	0.38886
						SYF1	0.92431	0.81944
						YDR417C	1.5066	0.6163
						RPL12B	2.5752	0.27853
						RAD30	1.3023	0.36597
						HKR1	1.0651	0.42605
						ARO80	0.85483	0.57723
						SIP1	1.1575	0.5598
						CAD1	1.2643	0.26868
						DYN2	1.1876	0.53443
						SNX41	1.0912	0.59643
						YDR426C	1.0963	0.79095
						RPN9	0	0.275
						BNA7	0.84238	0.66185
						TIF35	0	0.29358
						CYM1	0.91629	0.53331
						YDR431W	1.0606	0.69397
						NPL3	1.2192	0.84468
						YDR433W	1.3394	0.75735
						GPI17	0.82763	0.75429
						PPM1	0.65163	0.23926
						PPZ2	0.50426	0.052568
						GPI19	1.3772	0.37196
						THI74	0.93046	0.76195
						LRS4	0.57545	0.48407
						DOT1	0.93028	0.86243
						APT2	0.94674	0.69477
						YDR442W	1.3418	0.561
						SSN2	1.124	0.87439
						YDR444W	0.94864	0.82293
						YDR445C	0.85625	0.3519
						ECM11	1.4095	0.26484
						RPS17B	0.66441	0.31709
						ADA2	1.1291	0.81728
						UTP6	2.5506	0.24707
						RPS18A	1.6762	0.063601
						YHP1	0.82514	0.28642
						PPN1	0.87775	0.60619
						TSA2	0.81727	0.20402
						GUK1	0	0.44926
						YDR455C	1.2157	0.436
						NHX1	0.89696	0.76501
						TOM1	0.89843	0.7879
						HEH2	1.0932	0.70849
						PFA5	1.6129	0.013427
						TFB3	0.46194	0.38541
						MFA1	0.39075	0.37065
						YDR461C-A	0.9533	0.93624
						MRPL28	1.0194	0.97678
						STP1	1.8998	0.050287
						SPP41	1.6135	0.18774
						YDR464C-A	1.7436	0.26433
						RMT2	0.88893	0.61332
						PKH3	1.0193	0.91073
						YDR467C	0.93581	0.84623
						TLG1	0.42912	0.31583
						SDC1	0.62619	0.38631
						UGO1	0.21434	0.35324
						RPL27B	0.98353	0.96602
						TRS31	0.33457	0.26826
						PRP3	1.9093	0.042764
						JIP4	1.0398	0.85213
						YDR476C	1.0213	0.92464
						SNF1	1.9089	0.2044
						SNM1	0	0.44054
						PEX29	0.6812	0.29336
						DIG2	0.77453	0.32713
						PHO8	0.80018	0.52422
						CWC21	1.1355	0.30171
						KRE2	1.0429	0.90635
						VPS52	0.62614	0.49516
						VPS72	1.0151	0.9473
						VPS60	1.1478	0.62727
						RIB3	NaN	NaN
						PAC11	0.9024	0.62833
						SLD5	0	0.57643
						PKH1	0.71745	0.13133
						YDR491C	1.1065	0.25148
						IZH1	1.0865	0.69306
						MZM1	1.2013	0.72329
						RSM28	0.9342	0.9013
						VPS3	0.60068	0.35733
						PUF6	0.77895	0.076706
						ITR1	0.71165	0.31881
						SEC20	0.61286	0.063309
						LCD1	2.7268	0.0071542
						RPL37B	1.3444	0.51518
						PLM2	0.9958	0.99014
						SAM2	0.90676	0.72258
						LPP1	1.3491	0.21199
						SPG3	0.97585	0.96595
						PSP1	1.0984	0.67341
						GMC1	0.79794	0.37416
						GIN4	1.1069	0.55058
						GNP1	0.87398	0.57253
						YDR509W	0.70613	0.40005
						SMT3	8.4455	0.037367
						YDR510C-A	0.35065	0.37472
						SDH7	1.0427	0.88585
						EMI1	1.1914	0.14502
						GRX2	0.70426	0.30228
						YDR514C	0.91051	0.59654
						SLF1	1.6949	0.27956
						EMI2	1.0832	0.78954
						GRH1	0.77478	0.19091
						EUG1	0.51494	0.052763
						FPR2	1.3159	0.58519
						URC2	1.1292	0.42875
						YDR521W	0.60839	0.31675
						SPS2	0.7796	0.45813
						SPS1	1.2019	0.40524
						AGE1	1.3876	0.10649
						YDR524W-C	0.42506	0.24048
						YDR524C-B	0.6501	0.73244
						YDR524C-A	1.0094	0.96985
						API2	1.1294	0.47691
						SNA2	0.91779	0.74491
						YDR526C	0	0.44558
						RBA50	2.1544	0.056024
						HLR1	0.97468	0.81973
						QCR7	1.0374	0.9125
						APA2	1.0115	0.95534
						CAB1	3.3166	0.066263
						KRE28	1.1878	0.75414
						HSP31	1.0492	0.85113
						FIT1	0.71195	0.17803
						YDR535C	1.1694	0.49076
						STL1	0.81965	0.12151
						YDR537C	0.55293	0.33235
						PAD1	0.50144	0.18452
						FDC1	1.5079	0.23945
						IRC4	1.1714	0.65212
						YDR541C	0.80194	0.34317
						PAU10	2.6492	0.42638
						YDR543C	0.60056	0.35629
						YDR544C	1.3309	0.65081
						YRF1-1	NaN	NaN
						YDR545C-A	NaN	NaN
						YEL077C	0.96563	0.92588
						YEL077W-A	0.96749	0.96877
						YEL076C-A	NaN	NaN
						YEL076C	NaN	NaN
						YEL075W-A	0	0.44968
						YEL075C	0	0.44968
						YEL074W	1.0712	0.54902
						YEL073C	0.83789	0.60835
						RMD6	0.72944	0.21268
						DLD3	0.95027	0.80451
						DSF1	1.2375	0.27353
						HXT13	0.84488	0.51403
						YEL068C	1.1461	0.6495
						YEL067C	0.96543	0.79112
						HPA3	0.92764	0.82657
						SIT1	1.3232	0.10443
						AVT2	1.1343	0.50909
						CAN1	1.3987	0.18114
						NPR2	0.60176	0.32
						CIN8	1.1491	0.57518
						PRB1	0.7492	0.26384
						SOM1	0.99497	0.98753
						HHY1	0.96909	0.85527
						PCM1	1.0517	0.94787
						YEL057C	0.84799	0.40256
						HAT2	0.92555	0.64938
						POL5	0.70798	0.71144
						RPL12A	0.66936	0.41143
						YEL053W-A	0.66858	0.42771
						MAK10	0.94376	0.69713
						AFG1	1.1239	0.68978
						VMA8	0.86729	0.91076
						YEL050W-A	1.1899	0.73845
						RML2	0.59774	0.50119
						PAU2	1.2421	0.36095
						TCA17	2.1038	0.076789
						FRD1	1.039	0.82516
						GLY1	0.93398	0.95038
						YEL045C	0.88558	0.58632
						IES6	1.6651	0.30632
						YEL043W	0.90517	0.24625
						GDA1	0.98321	0.93753
						YEF1	0.81591	0.41018
						UTR2	1.0572	0.67249
						CYC7	0.95121	0.88759
						UTR4	0.7484	0.029315
						RAD23	0.99166	0.97521
						ANP1	1.1958	0.39987
						UTR5	1.117	0.27986
						YEL034C-A	0.70675	0.33602
						HYP2	1.0628	0.88807
						MTC7	1.2671	0.12
						MCM3	0	0.12891
						YEL032C-A	0	0.57934
						SPF1	1.157	0.72302
						YEL030C-A	1.6549	0.11315
						ECM10	0.9929	0.96183
						BUD16	0.65883	0.071553
						YEL028W	1.4939	0.12105
						VMA3	2.4408	0.28799
						SNU13	3.0455	0.16272
						YEL025C	0.93187	0.537
						RIP1	0.75688	0.6831
						YEL023C	1.0757	0.46553
						GEA2	1.0231	0.82393
						URA3	1.0474	0.83866
						YEL020C-B	NaN	NaN
						TIM9	0.77961	0.63781
						YEL020C	0.89684	0.21741
						MMS21	0.89357	0.69057
						YEL018C-A	0.71341	0.36066
						EAF5	0.76075	0.57807
						PMP2	0.54565	0.16139
						GTT3	1.0278	0.90547
						NPP2	1.035	0.77619
						EDC3	0.89404	0.45967
						YEL014C	1.1229	0.10056
						VAC8	1.0199	0.85838
						UBC8	1.2662	0.0062473
						GLC3	1.0896	0.44123
						YEL010W	1.1452	0.5189
						YEL009C-A	1.0667	0.70641
						GCN4	1.1683	0.36879
						YEL008W	1.0184	0.93572
						YEL008C-A	0.96078	0.90226
						MIT1	0.91984	0.69213
						YEA6	1.0855	0.61526
						VAB2	0.9827	0.91236
						YEA4	0.971	0.73783
						GIM4	1.036	0.7699
						WBP1	1.3804	0.11017
						IRC22	0.97942	0.8677
						MNN1	1.0649	0.58944
						NOP16	0.71984	0.47349
						PMI40	0.35462	0.21708
						FMP52	1.1417	0.29895
						YND1	1.3178	0.03272
						NUG1	1.1922	0.40368
						YER006C-A	1.1337	0.42156
						PAC2	1.3227	0.13053
						TMA20	1.0614	0.75205
						SEC3	0.9394	0.56552
						NTF2	Inf	0
						YER010C	1.0042	0.98051
						TIR1	0.95521	0.78479
						PRE1	1.4076	0.16302
						PRP22	1.1732	0.30037
						HEM14	0.20823	0.33569
						BUD25	1.0395	0.74169
						FAA2	0.97204	0.61669
						BIM1	1.0057	0.95701
						AFG3	0.77969	0.69516
						SPC25	0.97268	0.92457
						ISC1	1.298	0.23535
						SBH2	0.78943	0.54773
						GPA2	1.0056	0.95536
						RPN3	0.75727	0.47367
						SRB4	0.30342	0.15642
						PRO3	1.6146	0.35056
						YER023C-A	NaN	NaN
						YAT2	0.98078	0.83543
						GCD11	1.7845	0.26679
						CHO1	0.76819	0.77932
						GAL83	0.6056	0.0076722
						MIG3	1.0541	0.65396
						SMB1	0.90379	0.50866
						CHZ1	1.4204	0.45373
						YPT31	0.93886	0.71937
						FIR1	1.03	0.79105
						ZRG8	1.179	0.12785
						YER034W	0.9353	0.65323
						EDC2	1.0072	0.96564
						ARB1	1.5171	0.5254
						PHM8	0.84937	0.25095
						KRE29	1.1454	0.83632
						YER038W-A	1.667	0.13013
						HVG1	1.4105	0.077586
						YER039C-A	1.3995	0.17137
						GLN3	1.1301	0.34816
						YEN1	1.1035	0.32619
						MXR1	0.78106	0.476
						SAH1	1.5923	0.73878
						ERG28	2.6493	0.051068
						MEI4	0.95062	0.80849
						ACA1	1.0817	0.60762
						SPO73	0.73143	0.30878
						YER046W-A	0.69023	0.35349
						SAP1	0.9783	0.92068
						CAJ1	1.2549	0.035039
						ISD11	0.23847	0.24538
						TPA1	1.5554	0.075966
						RSM18	0.68488	0.76655
						JHD1	1.0648	0.7012
						HOM3	0.98516	0.95306
						PIC2	1.3844	0.1001
						YER053C-A	0.39513	0.60818
						GIP2	1.0441	0.74591
						HIS1	0.89087	0.55955
						FCY2	0.86535	0.44961
						RPL34A	0.96947	0.93961
						HMF1	1.1315	0.42566
						PET117	0.6572	0.41818
						PCL6	1.0264	0.92679
						FCY21	0.80317	0.14187
						FCY22	1.0615	0.73524
						CEM1	0.94578	0.63551
						GPP2	1.0071	0.92215
						THO1	0.77009	0.30667
						VHR2	1.0913	0.71244
						ICL1	1.1264	0.34757
						RRT13	0.60017	0.4305
						YER066C-A	0.83885	0.73777
						RGI1	1.3544	0.30959
						YER067C-A	1.1879	0.59097
						MOT2	1.3914	0.15857
						YER068C-A	0.71438	0.14707
						ARG5%2C6	0.45914	0.26241
						RNR1	1.3565	0.38332
						TDA2	0.76067	0.62559
						VTC1	1.0321	0.9198
						ALD5	1.3653	0.061823
						RPS24A	1.1335	0.89587
						YOS1	0	0.72097
						PTP3	0.96185	0.83945
						YER076C	1.0131	0.92385
						YER076W-A	0.95136	0.88917
						YER077C	1.1014	0.72094
						ICP55	0.96569	0.74703
						YER078W-A	1.2751	0.24799
						YER079W	1.1248	0.67987
						YER079C-A	0.93212	0.80795
						AIM9	0.80492	0.39846
						SER3	1.1275	0.37711
						UTP7	1.4587	0.47495
						GET2	0.73032	0.60313
						YER084W	0.78313	0.24071
						YER084W-A	0.2423	0.045425
						YER085C	0.2423	0.045425
						ILV1	2.3971	0.067446
						AIM10	0.67601	0.68265
						YER087C-A	0.63301	0.55715
						SBH1	0.79945	0.53654
						DOT6	0.85879	0.40518
						YER088C-A	1.003	0.97541
						YER088W-B	0.94235	0.66423
						PTC2	0.90051	0.46184
						TRP2	1.0228	0.90291
						YER090C-A	0.49987	0.43778
						MET6	0.17031	0.17247
						YER091C-A	0.79509	0.096878
						IES5	0.99153	0.97247
						TSC11	1.2588	0.267
						AIM11	0.95324	0.84781
						PUP3	0	0.72097
						RAD51	1.2174	0.60431
						SHC1	1.1643	0.51103
						YER097W	0.97812	0.8806
						UBP9	0.9214	0.67506
						PRS2	0.95527	0.83256
						UBC6	0.8694	0.6282
						AST2	0.70543	0.19983
						RPS8B	1.041	0.88804
						SSA4	1.1	0.72021
						RTT105	0.72902	0.64306
						NUP157	0.79865	0.32587
						MAM1	1.0553	0.56137
						GLE2	1.7043	0.60429
						YER107W-A	1.0454	0.94069
						FLO8	0.93666	0.80758
						KAP123	0.72819	0.34155
						SWI4	1.168	0.50429
						LSM4	4.5612	0.011603
						TMN3	0.8252	0.309
						BOI2	0.82555	0.43837
						SPR6	0.87669	0.72938
						SLX8	0.89795	0.23903
						RPL23B	0.2905	0.43844
						SHO1	0.9959	0.98958
						AVT6	1.0661	0.7947
						YER119C-A	0.82261	0.508
						SCS2	0.47761	0.13243
						YER121W	1.1244	0.64114
						GLO3	1.0984	0.60936
						YCK3	0.62337	0.26787
						DSE1	1.095	0.52264
						RSP5	1.7028	0.72499
						NSA2	2.1051	0.41698
						LCP5	0.73676	0.75291
						VFA1	1.0495	0.90375
						SAK1	1.1134	0.50855
						COM2	0.86022	0.19112
						RPS26B	1.5756	0.08557
						PMD1	1.0207	0.8637
						GLC7	0	0.20066
						YER133W-A	2.3263	0.031369
						YER134C	1.4947	0.07981
						YER135C	0.86593	0.75091
						GDI1	0	0.35605
						YER137C	0.9874	0.96279
						YER137W-A	1.0417	0.91051
						YER138W-A	1.8541	0.44675
						RTR1	0.80312	0.5449
						EMP65	0.7517	0.31868
						COX15	0.74345	0.60212
						MAG1	1.2182	0.55905
						DDI1	0.89349	0.5132
						UBP5	0.85485	0.13601
						FTR1	1.2946	0.54126
						YER145C-A	0.83305	0.53106
						LSM5	1.0651	0.87477
						SCC4	0.98759	0.97099
						YER147C-A	1.0896	0.90513
						SPT15	1.4552	0.6345
						YER148W-A	0.59023	0.41329
						PEA2	0.6011	0.17445
						SPI1	1.0944	0.82477
						UBP3	1.1347	0.73917
						YER152C	1.246	0.30222
						YER152W-A	1.3732	0.36504
						PET122	1.0022	0.99477
						OXA1	0.2653	0.23663
						BEM2	0.96549	0.93648
						YER156C	1.19	0.5701
						COG3	0.59804	0.31175
						YER158C	0.9208	0.43365
						YER158W-A	0.84865	0.64248
						BUR6	0.63753	0.50906
						SPT2	0.71139	0.23725
						RAD4	1.1041	0.76025
						GCG1	1.2828	0.35388
						CHD1	0.60529	0.1053
						PAB1	2.0177	0.32188
						YER165C-A	0.85116	0.78828
						DNF1	0.98818	0.94837
						BCK2	0.6561	0.30987
						CCA1	2.676	0.085002
						RPH1	0.96883	0.91947
						ADK2	1.0284	0.92292
						RAD3	0.55575	0.37287
						BRR2	1.2144	0.63525
						YER172C-A	0.7985	0.80708
						RAD24	1.2327	0.54246
						GRX4	0.85483	0.44783
						TMT1	1.0066	0.97456
						YER175W-A	0.76932	0.66278
						ECM32	1.0356	0.75083
						BMH1	1.0346	0.9282
						PDA1	0.56199	0.24187
						DMC1	0.87979	0.67729
						ISC10	0.888	0.66674
						SLO1	0.85597	0.78151
						YER181C	0.39015	0.33915
						FMP10	0.8995	0.74974
						FAU1	1.2616	0.3262
						TOG1	1.0233	0.7275
						PUG1	1.166	0.55975
						YER186C	1.0758	0.69277
						YER187W	0.63457	0.098844
						YER188W	1.1532	0.5139
						YER188C-A	0.67733	0.29013
						YER189W	0	0.48906
						YRF1-2	0.89558	0.63818
						YER190C-A	NaN	NaN
						YER190C-B	NaN	NaN
						YFL068W	NaN	NaN
						YFL067W	2.2328	0.27401
						YFL066C	0	0.28756
						YFL065C	0	0.61903
						YFL064C	2.0258	0.22387
						YFL063W	0.78589	0.32072
						COS4	0.45269	0.13615
						DDI2	0.53716	0.53691
						SNO3	0.52733	0.28833
						SNZ3	2.2148	0.011369
						THI5	0.53445	0.38011
						AAD16	1.1478	0.31457
						AAD6	1.2012	0.37449
						AGP3	1.1548	0.18353
						YFL054C	1.1399	0.28643
						DAK2	1.0027	0.98884
						YFL052W	0.7557	0.21959
						YFL051C	0.91196	0.73118
						ALR2	1.1383	0.45122
						SWP82	1.2341	0.3188
						EMP47	1.2699	0.29656
						RGD2	0.93401	0.70995
						FMP32	0.65715	0.23453
						SEC53	0	0.59599
						OTU1	0.99768	0.9912
						YFL042C	1.0717	0.48745
						YFL041W-A	0.48117	0.19276
						FET5	0.99218	0.95965
						YFL040W	0.82843	0.18108
						ACT1	4.7738	0.2131
						YPT1	0	0.43966
						TUB2	1.3422	0.70489
						RPO41	0.69096	0.6313
						MOB2	0.83451	0.54264
						RPL22B	1.5082	0.01473
						YFL034W	0.87385	0.29728
						RIM15	1.0172	0.95909
						YFL032W	1.3316	0.13637
						HAC1	1.2209	0.22149
						YFL031C-A	1.8484	0.31805
						AGX1	1.0063	0.96378
						CAK1	0	0.61823
						CAF16	0.59005	0.070141
						GYP8	1.0175	0.87705
						STE2	0.96923	0.52142
						BST1	1.0138	0.86594
						EPL1	1.0879	0.74077
						BUD27	0.90118	0.46239
						FRS2	1.4855	0.76454
						YFL021C-A	1.0453	0.67575
						GAT1	1.0471	0.72248
						PAU5	0.90417	0.82803
						YFL019C	1.4181	0.52761
						LPD1	0.83233	0.18515
						SMX2	1.2121	0.82483
						GNA1	1.0253	0.96428
						MDJ1	1.1969	0.58669
						YFL015W-A	0.82364	0.54015
						YFL015C	0.99077	0.96223
						HSP12	1.0401	0.89099
						YFL013W-A	0.87004	0.47836
						IES1	0.85273	0.30803
						YFL012W-A	1.0325	0.89976
						YFL012W	1.1558	0.09417
						HXT10	1.0319	0.85095
						AUA1	1.2026	0.18658
						WWM1	1.1757	0.25053
						CDC4	0.6977	0.31134
						SMC1	0	0.30152
						BLM10	0.9566	0.73978
						SEC4	0	0.57914
						VTC2	0.97163	0.85243
						MSH4	1.0002	0.99889
						SPB4	1.498	0.09632
						DEG1	1.0695	0.56814
						LOC1	1.565	0.16908
						NIC96	1.137	0.17097
						YPI1	0.79531	0.68811
						RPN11	1.5496	0.14708
						SAD1	0.83731	0.64102
						YFR006W	0.96834	0.84837
						YFH7	1.1319	0.56102
						FAR7	0.3253	0.16245
[truncated: 4,576 more rows]

## Sheet: Vps13SUP vs. rest
positively selected						gene	fold_change	student_ttest
gene	fold_change	student_ttest				YAL069W	1.1004	0.4426
MDM10	9.054	0.00025207				YAL068W-A	1.393	0.37063
SRB8	3.1691	0.0095646				PAU8	0.58616	0.32231
MDM34	2.806	0.0013055				YAL067W-A	0.88898	0.64556
YLR302C	6.8995	0.00023647				SEO1	1.0749	0.30537
MET17	Inf	1.0609e-06				YAL066W	1.2607	0.39807
SSN8	2.5605	0.023721				YAL065C	0.98615	0.88755
MDM12	6.1394	0.0013147				YAL064W-B	1.0821	0.8222
negatively selected						TDA8	1.0643	0.72683
gene	fold_change	student_ttest				YAL064W	1.195	0.60079
CSG2	0.1484	0.10543				YAL063C-A	0.67242	0.31579
HMRA1	0.049812	0.014606				FLO9	0.90532	0.51451
MET6	0.11971	0.0019826				GDH3	1.0336	0.76042
OXA1	0.18848	0.013941				BDH2	0.89772	0.26456
PEP8	0.2658	0.040504				BDH1	1.0498	0.52406
VPS1	0.25558	0.10841				YAL059C-A	1.0643	0.6679
YPT7	0.20507	0.0071719				ECM1	1.0449	0.75952
						CNE1	1.0573	0.67961
						YAL056C-A	1.0099	0.94539
						GPB2	1.2844	0.048028
						PEX22	1.1086	0.60866
						ACS1	0.97179	0.81547
						FLC2	1.043	0.72
						OAF1	0.94432	0.40701
						AIM2	0.96563	0.81374
						GEM1	1.1025	0.069582
						YAL047W-A	0.84572	0.46481
						SPC72	1.0276	0.89775
						AIM1	0.89269	0.60482
						YAL045C	1.0933	0.60281
						YAL044W-A	0.98472	0.95302
						GCV3	0.96191	0.72957
						PTA1	1.5425	0.057985
						YAL042C-A	0.9373	0.63405
						ERV46	1.0354	0.7119
						CDC24	0.82561	0.44665
						CLN3	0.97082	0.87477
						CYC3	0.50103	0.027158
						CDC19	1.0361	0.94647
						YAL037C-B	1.0289	0.95702
						YAL037C-A	0.93801	0.73522
						YAL037W	0.91807	0.34455
						RBG1	0.97447	0.82131
						FUN12	1.1971	0.64577
						YAL034C-B	1.1025	0.53262
						MTW1	1.0382	0.72357
						FUN19	1.0076	0.90343
						POP5	0.81662	0.55391
						PRP45	0.83527	0.26274
						YAL031W-A	1.2358	0.24429
						GIP4	1.1782	0.031952
						SNC1	0.9466	0.82409
						MYO4	0.98742	0.87233
						FRT2	0.96368	0.64741
						SAW1	1.0741	0.64654
						YAL026C-A	1.0735	0.79892
						DRS2	1.0451	0.8844
						MAK16	1.4454	0.51446
						LTE1	0.56458	0.023743
						PMT2	0.90293	0.47045
						FUN26	0.92467	0.32744
						CCR4	0.96831	0.88336
						ATS1	1.0242	0.88296
						YAL019W-A	0.99219	0.93431
						FUN30	1.0366	0.72423
						LDS1	1.0836	0.64413
						PSK1	0.9543	0.22195
						YAL016C-B	0.63564	0.019169
						YAL016C-A	0.89661	0.52213
						TPD3	1.9064	0.084906
						NTG1	1.036	0.77909
						SYN8	1.2981	0.017574
						DEP1	1.108	0.28027
						CYS3	1.9568	0.27981
						SWC3	1.3472	0.0065575
						MDM10	9.054	0.00025207
						SPO7	1.0569	0.72403
						FUN14	0.90912	0.47838
						ERP2	0.95696	0.16066
						SSA1	0.86529	0.14905
						YAL004W	1.0207	0.92105
						EFB1	0	0.18636
						VPS8	1.0214	0.91617
						TFC3	1.291	0.028109
						NUP60	1.2193	0.17942
						ERP1	1.1609	0.29537
						SWD1	1.2859	0.27154
						RFA1	1.1405	0.56468
						SEN34	0.8767	0.68594
						BUD14	0.9802	0.65146
						ADE1	0.32748	0.35932
						KIN3	0.97536	0.87219
						CDC15	1.6907	0.24351
						YAR019W-A	1.0593	0.61719
						PAU7	1.1001	0.67159
						YAR023C	1.0636	0.46868
						UIP3	1.0087	0.96616
						YAR028W	0.87377	0.60317
						YAR029W	1.1081	0.80768
						YAR030C	1.3154	0.061479
						PRM9	0.78187	0.1938
						MST28	0.85896	0.32133
						YAT1	1.0192	0.78122
						YAR035C-A	1.1634	0.50169
						SWH1	1.0596	0.57945
						YAR047C	0.99361	0.99019
						FLO1	0.96255	0.6611
						YAR053W	1.2626	0.39844
						YAR060C	NaN	NaN
						YAR064W	0.95105	0.7698
						YAR066W	0.76673	0.79134
						YAR068W	1.0344	0.95698
						YAR069C	NaN	NaN
						YAR070C	0.85367	0.78406
						PHO11	0.65155	0.45572
						IMD1	0.65343	0.27037
						YAR075W	1.0337	0.90649
						YBL113C	1.3435	0.15519
						YBL113W-A	0.95345	0.96361
						YBL112C	NaN	NaN
						YBL111C	0.65103	0.6987
						YBL109W	1.5898	0.0062127
						PAU9	0	0.57613
						YBL108W	0.85644	0.51942
						YBL107W-A	2.5826	0.35009
						MIX23	0.95676	0.79507
						SRO77	1.1018	0.44912
						PKC1	2.4341	0.017817
						SEA4	1.2057	0.28139
						RTG3	1.1682	0.54879
						SFT2	0.88573	0.73064
						ECM21	1.0756	0.44763
						YBL100W-C	1.3866	0.32213
						YBL100C	0.75937	0.76454
						ATP1	0.12874	0.21836
						BNA4	0.84863	0.44553
						BRN1	1.2908	0.044759
						YBL096C	0.76927	0.34229
						YBL095W	0.88658	0.50558
						YBL094C	0.85336	0.61998
						ROX3	1.0048	0.98622
						RPL32	Inf	0.11739
						SCS22	1.0805	0.81241
						MAP2	1.107	0.62749
						MRP21	0.52728	0.16889
						AVT5	0.98683	0.9147
						TEL1	0.85583	0.28858
						RPL23A	1.147	0.24584
						YBL086C	0.79255	0.23095
						BOI1	1.1189	0.13247
						CDC27	0.94915	0.78173
						YBL083C	0.95392	0.87921
						ALG3	0.75228	0.082883
						YBL081W	0.86843	0.46328
						PET112	0.33529	0.10259
						NUP170	1.4402	0.071155
						ATG8	1.6244	0.32972
						YBL077W	1.1037	0.56032
						ILS1	0	0.22778
						SSA3	0.99768	0.98134
						AAR2	1.3394	0.031335
						YBL073W	0.78824	0.12837
						RPS8A	0.9792	0.95777
						YBL071C-B	0.94969	0.87845
						KTI11	0.64799	0.46173
						YBL071C	1.0425	0.85298
						YBL070C	1.3195	0.42187
						AST1	0.85981	0.47614
						YBL068W-A	0.6766	0.60309
						PRS4	1.0232	0.90567
						UBP13	0.97604	0.78573
						SEF1	0.89908	0.57658
						YBL065W	0.99841	0.99602
						PRX1	0.71156	0.14279
						KIP1	1.0767	0.37756
						YBL062W	0.64965	0.28104
						SKT5	0.93303	0.71922
						YEL1	1.0609	0.60567
						CMC2	0.33069	0.15588
						YBL059W	0.80545	0.43217
						SHP1	0.78924	0.49098
						PTH2	1.1505	0.37821
						PTC3	0.8135	0.41068
						YBL055C	0.93559	0.65768
						TOD6	1.1946	0.25255
						YBL053W	0.99184	0.97409
						SAS3	0.92124	0.35249
						PIN4	0.9962	0.98951
						SEC17	0	0.39301
						MOH1	1.1609	0.59775
						RRT1	1.3189	0.2526
						EDE1	1.1212	0.45882
						PSY4	1.041	0.75482
						COR1	0.47866	0.066879
						YBL044W	1.1074	0.032836
						ECM13	1.261	0.20905
						FUI1	1.1858	0.20525
						PRE7	3.0761	0.41456
						ERD2	1.0247	0.9075
						YBL039W-B	0.55343	0.28637
						URA7	1.0607	0.22295
						YBL039C-A	3.0339	0.025395
						MRPL16	0.44902	0.070413
						APL3	1.0609	0.5509
						YBL036C	1.0409	0.72959
						POL12	1.5532	0.043213
						STU1	0.86426	0.51001
						RIB1	1.092	0.77931
						HEK2	1.0426	0.87471
						SHE1	0.84986	0.54008
						PET9	0.44954	0.19648
						YBL029C-A	0.95111	0.80743
						YBL029W	1.0599	0.69123
						YBL028C	0.80509	0.39575
						RPL19B	1.4344	0.28708
						LSM2	0.5739	0.54714
						RRN10	2.0525	0.011097
						NCL1	1.0362	0.70212
						MCM2	0.87717	0.5202
						PIM1	0.36333	0.015578
						HAP3	1.098	0.27346
						RFT1	1.1726	0.58759
						APN2	1.0964	0.15735
						POP8	0.87963	0.50103
						PEP1	1.0576	0.5126
						FUS3	0.88711	0.30948
						ACH1	0.82958	0.26169
						RRN6	0.85557	0.05947
						FMT1	0.83017	0.27086
						YBL012C	0.91097	0.60262
						SCT1	0.86896	0.13621
						YBL010C	1.0621	0.56795
						ALK2	1.037	0.58507
						YBL008W-A	0.92892	0.66826
						HIR1	0.99686	0.96627
						SLA1	1.0667	0.82115
						LDB7	1.0295	0.89513
						YBL006W-A	1.0781	0.74211
						PDR3	1.0349	0.75334
						UTP20	0.62389	0.15496
						HTA2	1.1681	0.39648
						HTB2	1.0907	0.50874
						ECM15	0.86642	0.52178
						NTH2	1.0095	0.95037
						RER2	1.2396	0.44612
						COQ1	0.40043	0.028783
						GPI18	0.16138	0.090001
						RCR1	0.86773	0.2651
						UGA2	1.1069	0.41845
						DSF2	0.99782	0.98349
						FLR1	0.93807	0.40373
						HHF1	0.84456	0.65212
						HHT1	0.99951	0.99743
						IPP1	0.76029	0.37929
						YBR012C	0.82799	0.29321
						YBR013C	1.0091	0.94254
						GRX7	0.93847	0.75004
						MNN2	0.97871	0.79243
						YBR016W	0.97535	0.86024
						KAP104	0.99549	0.98322
						GAL7	0	0.10606
						GAL10	1.2267	0.43977
						GAL1	1.1096	0.78197
						FUR4	1.0594	0.74688
						POA1	1.1336	0.33591
						CHS3	0.91146	0.6025
						SCO2	1.0804	0.58097
						OLA1	0.87201	0.57715
						ETR1	0.87726	0.2159
						YBR027C	1.0314	0.85515
						YPK3	1.1217	0.41052
						CDS1	1.6893	0.21736
						RKM3	0.89195	0.48599
						RPL4A	0.79403	0.5751
						YBR032W	0.75306	0.19152
						EDS1	1.0271	0.84976
						HMT1	0.76354	0.20958
						PDX3	0.71416	0.48378
						CSG2	0.1484	0.10543
						SCO1	0.46437	0.099019
						CHS2	1.1586	0.74161
						ATP3	0.24026	0.2227
						FIG1	1.1015	0.70307
						FAT1	0.79882	0.047603
						CST26	0.88406	0.26159
						QDR3	1.0911	0.49014
						TCM62	1.0782	0.44914
						GIP1	1.166	0.19463
						ZTA1	1.1785	0.26802
						FMP23	1.0022	0.97925
						RPS11B	1.2522	0.36229
						REB1	2.6209	0.0095685
						REG2	0.97366	0.80477
						YBR051W	0.99458	0.98218
						RFS1	0.9871	0.94965
						YBR053C	0.97584	0.81152
						YRO2	1.2074	0.16814
						PRP6	1.2756	0.2303
						YBR056W	0.93058	0.68032
						YBR056W-A	1.0728	0.82915
						YBR056C-B	1.244	0.45944
						MUM2	0.63103	0.022046
						UBP14	0.89783	0.6004
						TSC3	0.62516	0.46878
						AKL1	1.0167	0.87166
						ORC2	0.94017	0.8158
						TRM7	1.0726	0.78871
						YBR062C	0.87703	0.66524
						YBR063C	0.73364	0.00077052
						YBR064W	0.92086	0.70017
						ECM2	0.94466	0.43337
						NRG2	0.83648	0.55135
						TIP1	0.91848	0.75926
						BAP2	0.72117	0.53394
						TAT1	1.5424	0.27554
						ALG14	0	0.57613
						YBR071W	0.89954	0.58793
						HSP26	1.0008	0.9977
						YBR072C-A	1.1884	0.23712
						RDH54	1.1895	0.23077
						PFF1	1.0235	0.81158
						ECM8	0.85242	0.59641
						YBR076C-A	1.006	0.97814
						SLM4	0.93528	0.74507
						ECM33	0.98759	0.93469
						RPG1	0.97653	0.92648
						SEC18	0.78705	0.71633
						SPT7	0.88882	0.67582
						UBC4	1.6392	0.051665
						TEC1	1.1829	0.26185
						MIS1	0.94559	0.45967
						RPL19A	1.2447	0.19073
						AAC3	0.81778	0.56467
						YBR085C-A	1.387	0.073493
						IST2	0.73533	0.097489
						RFC5	6.803	0.030364
						POL30	2.4096	0.43443
						YBR089W	0	0.57613
						NHP6B	0.90006	0.48015
						YBR090C	0.99953	0.99839
						TIM12	NaN	NaN
						PHO3	0.77978	0.042375
						PHO5	1.2991	0.13844
						PBY1	1.1272	0.21883
						RXT2	1.1864	0.5283
						YBR096W	1.0179	0.87131
						VPS15	1.0263	0.88813
						MMS4	0.80079	0.092741
						YBR099C	0.65343	0.10124
						FES1	0.74949	0.27486
						EXO84	1.0627	0.80128
						SIF2	1.2672	0.27525
						YBR103C-A	0.91641	0.53388
						YMC2	1.0006	0.99601
						VID24	0.95071	0.78623
						PHO88	1.0749	0.74714
						IML3	0.98239	0.96156
						AIM3	0.95097	0.6412
						CMD1	2.671	0.47995
						YBR109W-A	1.0976	0.80847
						ALG1	0.38299	0.46189
						YSA1	0.88384	0.6179
						SUS1	0.86914	0.80631
						CYC8	1.1573	0.54472
						YBR113W	1.0435	0.9178
						RAD16	0.90635	0.37661
						LYS2	0.31691	0.15423
						YBR116C	0.85656	0.41191
						TKL2	0.98933	0.93023
						TEF2	0.99365	0.99346
						MUD1	0.97497	0.94475
						CBP6	1.2412	0.58026
						GRS1	Inf	0.11739
						YBR121C-A	NaN	NaN
						MRPL36	0.75766	0.40025
						TFC1	0.80757	0.73677
						YBR124W	0.83382	0.080253
						PTC4	0.986	0.91725
						TPS1	1.5155	0.38351
						YBR126W-A	1.1587	0.47655
						YBR126W-B	1.3751	0.049553
						VMA2	1.0933	0.71627
						ATG14	0.97957	0.94328
						OPY1	0.92689	0.77171
						SHE3	1.1476	0.62035
						CCZ1	0.46632	0.23218
						YBR131C-A	0	0.57613
						AGP2	1.1773	0.35475
						HSL7	1.3833	0.012056
						YBR134W	0.8721	0.45484
						CKS1	1.266	0.65383
						MEC1	1.7297	0.12277
						YBR137W	0.94826	0.77532
						YBR138C	1.1063	0.43619
						YBR139W	0.57982	0.089224
						IRA1	1.1068	0.61213
						BMT2	1.3178	0.094154
						YBR141W-A	1.8661	0.10424
						MAK5	0.35998	0.12403
						SUP45	0	0.57613
						YBR144C	1.0847	0.73903
						ADH5	0.96648	0.77768
						MRPS9	0.60259	0.47469
						RTC2	0.86842	0.58588
						YSW1	1.3055	0.042223
						ARA1	0.78981	0.25552
						TBS1	1.2665	0.30755
						APD1	1.1933	0.16274
						SPP381	1.1822	0.4762
						RIB7	1.0673	0.94732
						RPB5	0	0.37558
						CNS1	0.87899	0.84376
						SLI15	0.69963	0.50307
						ICS2	1.0828	0.60693
						AMN1	1.0457	0.77313
						IFA38	0.92323	0.9312
						CDC28	1.3715	0.78058
						CSH1	1.0788	0.78671
						TOS1	0.95952	0.85321
						YSY6	0.38142	0.22864
						EXO5	0.4397	0.14149
						ARL1	0.60488	0.25264
						UBS1	1.2107	0.55816
						TYR1	1.0645	0.90858
						POP7	0	0.57613
						PEX32	1.2093	0.35247
						SSE2	0.92364	0.66153
						NPL4	0.76674	0.22974
						SEC66	0.82667	0.59375
						SMY2	1.0617	0.78602
						UMP1	0.66607	0.56819
						YBR174C	0.99124	0.9655
						SWD3	2.0753	0.010593
						ECM31	0.96222	0.79985
						EHT1	1.1674	0.37961
						YBR178W	1.1593	0.31977
						FZO1	0.30398	0.050821
						DTR1	1.0531	0.7915
						RPS6B	1.6935	0.039966
						SMP1	1.0828	0.64763
						YBR182C-A	1.3026	0.41847
						YPC1	0.96769	0.935
						YBR184W	1.0151	0.92888
						MBA1	0.68386	0.21957
						PCH2	1.1047	0.47742
						GDT1	1.1334	0.69693
						NTC20	1.0899	0.60572
						RPS9B	1.1885	0.69604
						YBR190W	0.91867	0.79596
						RPL21A	1.1406	0.87955
						YBR191W-A	0.58341	0.72398
						RIM2	0.36952	0.27403
						MED8	1.1693	0.84171
						AIM4	1.1724	0.60215
						MSI1	1.0986	0.7045
						PGI1	0	0.57613
						YBR196C-A	1.0766	0.5941
						YBR196C-B	0.70667	0.21266
						YBR197C	1.0931	0.6623
						TAF5	0.97428	0.98378
						KTR4	1.0278	0.8885
						BEM1	0.77977	0.55718
						YBR200W-A	0.84974	0.83652
						DER1	1.0237	0.9509
						YBR201C-A	1.0753	0.82899
						MCM7	0.61076	0.2402
						COS111	0.8941	0.67193
						LDH1	1.1168	0.4779
						KTR3	0.98233	0.92179
						YBR206W	1.1204	0.52847
						FTH1	1.0665	0.69373
						DUR1%2C2	1.0732	0.70448
						YBR209W	1.0354	0.52763
						ERV15	1.4194	0.10052
						AME1	0.76803	0.23959
						NGR1	1.1188	0.30582
						MET8	0.97698	0.90917
						SDS24	1.0131	0.93229
						HPC2	0.75559	0.37463
						YBP1	0.91884	0.68595
						ATG12	0.71424	0.07323
						PYC2	1.03	0.56274
						YBR219C	0.92858	0.31301
						YBR220C	0.81734	0.035214
						PDB1	1.1473	0.4844
						YBR221W-A	0.86112	0.24225
						PCS60	0.94348	0.54829
						TDP1	1.1048	0.15124
						YBR223W-A	0.85877	0.5634
						YBR224W	0.7956	0.356
						YBR225W	1.2734	0.25465
						YBR226C	0.97855	0.95041
						MCX1	1.2089	0.27624
						SLX1	0.84645	0.41789
						ROT2	0.91719	0.68742
						OM14	1.0057	0.98937
						YBR230W-A	0.60875	0.15923
						SWC5	1.3647	0.25195
						YBR232C	0.90001	0.60113
						PBP2	1.0571	0.7142
						DAD3	2.8315	0.45191
						ARC40	0	0.57613
						VHC1	0.88892	0.50902
						ABD1	0.789	0.78245
						PRP5	2.418	0.24186
						YBR238C	0.70243	0.0581
						ERT1	0.89976	0.35105
						THI2	1.4032	0.067161
						YBR241C	1.2484	0.29143
						YBR242W	1.0879	0.73433
						ALG7	0.87038	0.89573
						GPX2	1.024	0.93091
						ISW1	1.2505	0.16838
						RRT2	0.73937	0.27853
						ENP1	1.5281	0.55067
						HIS7	0.85927	0.43616
						ARO4	0.86687	0.47432
						SPO23	1.055	0.74574
						MRPS5	0.37227	0.042637
						DUT1	0	0.28249
						SRB6	1.122	0.8044
						TRS20	1.0213	0.98631
						MTC4	1.049	0.83092
						YBR255C-A	0.8988	0.78768
						RIB5	1.005	0.9924
						POP4	2.4751	0.51848
						SHG1	1.0003	0.99908
						YBR259W	0.91872	0.23452
						RGD1	1.3532	0.042411
						TAE1	0.82465	0.16723
						MIC12	0.86244	0.6966
						SHM1	1.1259	0.25889
						YPT10	1.2863	0.076531
						TSC10	1.1764	0.75197
						REI1	0.90411	0.67604
						SLM6	1.0794	0.8925
						MRPL37	0.54748	0.5087
						FMP21	0.71113	0.35264
						BIT2	1.1183	0.62378
						EFM2	1.0363	0.89109
						HSM3	1.2375	0.15581
						UBX7	1.1991	0.56141
						CHK1	1.2002	0.46118
						RIF1	0.85707	0.28916
						PPS1	1.2241	0.11187
						YBR277C	1.227	0.35825
						DPB3	0.80742	0.46464
						PAF1	1.0003	0.99879
						SAF1	0.63415	0.081663
						DUG2	1.2284	0.12305
						MRPL27	0.47712	0.30396
						SSH1	1.0944	0.41261
						YBR284W	1.0082	0.91915
						YBR285W	1.331	0.62629
						APE3	0.81384	0.30556
						YBR287W	1.1567	0.22636
						APM3	1.1705	0.46101
						SNF5	0.90542	0.58022
						BSD2	1.0298	0.88812
						CTP1	1.0754	0.40656
						YBR292C	0.94722	0.82029
						VBA2	0.8335	0.28878
						SUL1	0.95922	0.66936
						PCA1	1.3101	0.058836
						PHO89	0.98457	0.92354
						YBR296C-A	1.1717	0.65254
						MAL33	1.0144	0.92269
						MAL31	1.3687	0.26757
						YBR298C-A	0.70786	0.18322
						MAL32	0.78181	0.39754
						YBR300C	1.2379	0.55227
						PAU24	0.74539	0.54282
						COS2	1.9088	0.61065
						YCL076W	1.2014	0.75683
						GEX1	0.6629	0.27658
						VBA3	0.45214	0.38922
						YCL068C	1.0188	0.9806
						HMLALPHA2	NaN	NaN
						HMLALPHA1	NaN	NaN
						YCL065W	0	0.57613
						CHA1	1.2601	0.58773
						VAC17	1.0449	0.77362
						MRC1	1.1469	0.54281
						KRR1	0.54035	0.371
						FYV5	0.93829	0.79436
						ADF1	0.91398	0.87494
						MIC10	0.47398	0.1311
						PRD1	1.3877	0.048841
						PEX34	0.56901	0.089656
						KAR4	0.84562	0.34704
						SPB1	0.99132	0.98354
						PBN1	1.0492	0.79238
						LRE1	1.2564	0.054206
						APA1	0.77897	0.21031
						YCL049C	0.83439	0.16941
						YCL048W-A	0.96002	0.89747
						SPS22	0.7668	0.19623
						POF1	1.1381	0.30958
						EMC1	0.73375	0.13855
						YCL046W	1.0754	0.83387
						MGR1	0.72649	0.17723
						PDI1	0.14947	0.10972
						YCL041C	1.0226	0.90453
						YCL042W	1.005	0.9799
						GLK1	0.88745	0.11069
						GID7	0.76156	0.027666
						ATG22	0.92103	0.42851
						SRO9	0.88264	0.27704
						GFD2	1.0686	0.6373
						GRX1	1.3026	0.29331
						LSB5	1.0525	0.71438
						MXR2	1.0762	0.75038
						STE50	1.1107	0.30194
						RRP7	1.7876	0.28008
						HIS4	1.0149	0.89961
						BIK1	1.0373	0.82037
						RNQ1	1.0975	0.31287
						FUS1	1.0534	0.5445
						HBN1	1.0401	0.81766
						FRM2	1.0802	0.35623
						AGP1	0.91604	0.28122
						YCL023C	0.90163	0.45581
						KCC4	1.0763	0.3404
						YCL022C	1.1239	0.28591
						YCL021W-A	0.90895	0.23401
						LEU2	NaN	NaN
						NFS1	1.0327	0.96882
						DCC1	1.121	0.48111
						BUD3	1.1231	0.11283
						YCL012C	1.1239	0.48807
						GBP2	1.0173	0.88322
						SGF29	0.80635	0.37725
						ILV6	0.99324	0.95302
						STP22	0.99101	0.96186
						YCL007C	1.0341	0.83218
						VMA9	1.2234	0.67648
						LDB16	0.9469	0.79793
						PGS1	0.40701	0.11374
						YCL002C	0.9668	0.83252
						RER1	0.91907	0.83059
						YCL001W-A	1.0742	0.86438
						YCL001W-B	1.0731	0.64472
						YCR001W	0.97784	0.87478
						CDC10	0.72278	0.5183
						MRPL32	0.66186	0.099027
						YCP4	1.0846	0.65997
						CIT2	1.2033	0.052106
						YCR006C	1.1309	0.55731
						YCR007C	1.0349	0.85744
						SAT4	0.91023	0.50084
						RVS161	0.59635	0.21253
						ADY2	0.94573	0.7203
						ADP1	0.92554	0.20051
						PGK1	1.8428	0.28807
						YCR013C	1.0484	0.84772
						POL4	1.0586	0.45951
						YCR015C	0.81975	0.15538
						YCR016W	1.0027	0.9863
						CWH43	0.9328	0.55354
						SRD1	1.1085	0.67299
						YCR018C-A	1.0936	0.627
						MAK32	0.90939	0.37993
						PET18	0.85948	0.39912
						MAK31	0.70388	0.35553
						HTL1	0.96038	0.94896
						HSP30	1.0448	0.5954
						YCR022C	0.83777	0.042384
						YCR023C	1.0355	0.62631
						SLM5	0.39669	0.085913
						YCR024C-B	0.77497	0.25488
						PMP1	0.7645	0.21977
						YCR025C	0.99423	0.96297
						NPP1	0.8884	0.21869
						RHB1	1.006	0.98415
						FEN2	1.255	0.48745
						RIM1	0.31942	0.21041
						SYP1	1.1021	0.5527
						RPS14A	1.0142	0.96296
						BPH1	0.75624	0.0055781
						SNT1	1.1591	0.4972
						ELO2	1.1036	0.78405
						RRP43	0.96406	0.97636
						RBK1	1.0225	0.68676
						PHO87	0.88652	0.37891
						BUD5	1.176	0.62401
						YCR038W-A	1.0208	0.94429
						MATALPHA2	0.82113	0.82056
						MATALPHA1	NaN	NaN
						YCR041W	0.49775	0.25283
						TAF2	0.5635	0.12932
						YCR043C	1.2256	0.33831
						PER1	0.15022	0.11815
						RRT12	0.93901	0.48275
						YCR045W-A	1.0294	0.89961
						IMG1	0.59111	0.1997
						BUD23	0.72141	0.24506
						YCR047W-A	0.53374	0.60448
						YCR049C	1.1363	0.32931
						ARE1	1.0662	0.57009
						YCR050C	1.2689	0.29568
						YCR051W	1.1143	0.59843
						RSC6	0.99735	0.99394
						THR4	0.76898	0.31579
						CTR86	1.2791	0.41269
						PWP2	1.1804	0.59225
						YIH1	0.9279	0.63921
						TAH1	0.66861	0.35977
						YCR061W	0.91879	0.42381
						YCR064C	0.96841	0.83484
						BUD31	1.458	0.17693
						HCM1	1.1182	0.26611
						RAD18	1.377	0.28844
						SED4	0.89895	0.33412
						ATG15	0.86637	0.26362
						CPR4	1.1595	0.36325
						IMG2	0.38774	0.22238
						RSA4	NaN	NaN
						SSK22	1.0916	0.41413
						SOL2	0.92739	0.59177
						ERS1	0.93928	0.70802
						YCR075W-A	0.47999	0.10319
						FUB1	0.94751	0.83565
						PAT1	0.61865	0.14164
						PTC6	0.75473	0.057699
						SRB8	3.1691	0.0095646
						YCR081C-A	2.797	0.2032
						AHC2	1.535	0.11514
						TRX3	1.0089	0.96619
						TUP1	0.53598	0.29518
						YCR085W	0.95963	0.87275
						CSM1	0.69462	0.23668
						YCR087W	1.0878	0.65117
						YCR087C-A	1.052	0.81765
						ABP1	1.0381	0.69974
						FIG2	0.8714	0.31974
						YCR090C	0.903	0.68141
						KIN82	0.99337	0.96469
						MSH3	1.0109	0.95377
						CDC39	0.77856	0.48627
						CDC50	0.5328	0.34755
						OCA4	1.1563	0.64747
						YCR095W-A	0.97965	0.97643
						HMRA2	NaN	NaN
						HMRA1	0.049812	0.014606
						YCR097W-A	0.76952	0.59367
						GIT1	0.82693	0.36254
						YCR099C	0.43117	0.12708
						YCR100C	0.90077	0.68703
						YCR101C	0.6974	0.24138
						YCR102C	1.13	0.61297
						YCR102W-A	1.5514	0.5114
						PAU3	1.091	0.67525
						ADH7	1.412	0.038553
						RDS1	1.0652	0.75977
						AAD3	1.2253	0.49356
						YCR108C	1.2607	0.27438
						COS7	1.4175	0.42943
						YDL247W-A	0	0.57613
						MPH2	0.88702	0.89922
						SOR2	3.5077	0.033706
						HXT15	1.3461	0.53945
						THI13	0.83388	0.60558
						AAD4	1.085	0.59945
						YDL242W	1.0351	0.87808
						YDL241W	0.82263	0.61683
						YDL240C-A	1.0741	0.52217
						LRG1	0.9541	0.632
						ADY3	1.0279	0.76554
						GUD1	0.78719	0.22552
						AIM6	1.0358	0.85526
						PHO13	1.5498	0.066824
						YPD1	0.5647	0.18188
						GYP7	1.1353	0.20481
						MFG1	1.2671	0.17012
						OST4	Inf	0.11739
						BRE4	0.9517	0.51837
						PTP1	1.0591	0.803
						SSB1	1.0393	0.84886
						YDL228C	0.81626	0.39321
						HO	1.2106	0.23257
						GCS1	1.1111	0.63894
						SHS1	1.0797	0.77137
						WHI4	1.3961	0.22933
						HBT1	1.0477	0.61316
						FMP45	0.80516	0.55325
						YDL221W	1.0529	0.74193
						CDC13	1.0749	0.65586
						DTD1	1.9514	0.15131
						YDL218W	1.0785	0.6495
						TIM22	0.5189	0.42162
						RRI1	0.908	0.60978
						GDH2	0.98851	0.90633
						PRR2	0.88894	0.4194
						NOP6	1.6231	0.10559
						SHR3	1.7095	0.34638
						YDL211C	0.98295	0.93026
						UGA4	1.1566	0.23403
						CWC2	0.34059	0.41175
						NHP2	0.80223	0.3186
						GLE1	1.2167	0.41016
						YDL206W	1.3855	0.12801
						HEM3	1.3948	0.76997
						RTN2	1.0178	0.90865
						ACK1	1.1244	0.3685
						MRPL11	0.36692	0.081159
						TRM8	1.2056	0.09768
						MGT1	1.1424	0.59284
						YDL199C	1.1371	0.41756
						GGC1	0.54177	0.27423
						ASF2	1.1054	0.58784
						YDL196W	1.0268	0.62715
						SEC31	1.7547	0.42434
						SNF3	0.93501	0.6633
						NUS1	0.95794	0.94183
						ARF1	1.0758	0.81383
						RPL35A	0.19135	0.34616
						UFD2	1.0839	0.73295
						RBS1	0.96332	0.87695
						PPH22	0.86102	0.51733
						YDL187C	1.2322	0.4437
						YDL186W	0.93434	0.82136
						YDL185C-A	0.91362	0.8637
						VMA1	1.729	0.082094
						RPL41A	Inf	0.11739
						YDL183C	1.0186	0.84877
						LYS20	0.99031	0.96252
						INH1	1.0113	0.96132
						YDL180W	1.0869	0.63925
						PCL9	1.3746	0.22874
						DLD2	0.84805	0.26969
						YDL177C	1.5818	0.011694
						YDL176W	1.0273	0.76485
						AIR2	1.1211	0.29733
						DLD1	1.1657	0.089763
						PAR32	0.76257	0.24561
						YDL172C	0.70911	0.14534
						GLT1	1.0469	0.70557
						UGA3	1.028	0.56
						UGX2	0.90444	0.6383
						SFA1	1.3428	0.20587
						NRP1	1.0805	0.73659
						FAP7	0.69173	0.65419
						CDC36	0.53049	0.32679
						CDC9	0.67828	0.27481
						YDL163W	0.75393	0.42249
						YDL162C	0.99824	0.98196
						ENT1	1.313	0.027471
						MHF2	1.1151	0.7811
						DHH1	0.91135	0.82255
						YDL159W-A	1.1504	0.3383
						STE7	1.1422	0.1196
						YDL159C-B	0.90743	0.84836
						YDL158C	1.4768	0.38289
						YDL157C	0.98566	0.96893
						CMR1	1.278	0.046717
						CLB3	1.108	0.54257
						MSH5	0.99341	0.96122
						SAS10	1.8476	0.17632
						YDL152W	1.3397	0.10768
						BUD30	1.9612	0.23766
						RPC53	1.929	0.27519
						ATG9	0.87051	0.59857
						NOP14	1.0437	0.78959
						RPN5	1.0557	0.93497
						LDB17	1.3011	0.28622
						COP1	1.3173	0.56661
						YDL144C	0.76642	0.13555
						CCT4	0	0.22092
						CRD1	0.79409	0.28681
						BPL1	0.18761	0.069646
						RPO21	0.79147	0.49597
						SCM3	0.73542	0.68682
						RGT2	1.1799	0.24165
						ARF2	0.87565	0.36889
						RPL35B	0.89095	0.75378
						RDI1	0.8286	0.44308
						PPH21	0.93808	0.62311
						RPL41B	1.0367	0.96841
						SRF1	1.321	0.057639
						CDC53	1.7419	0.12054
						LYS21	0.78605	0.10361
						STF1	1.3142	0.23998
						RPP1B	1.3646	0.085428
						YDL129W	1.2264	0.13943
						VCX1	1.4106	0.058995
						PCL2	0.94475	0.78232
						CDC48	0.84775	0.76271
						HNT1	1.1312	0.34176
						YDL124W	1.0607	0.66731
						SNA4	0.85773	0.50769
						UBP1	0.97645	0.92408
						YDL121C	0.7012	0.21676
						YFH1	1.4296	0.75022
						YDL119C	1.0541	0.78954
						YDL118W	1.2752	0.49132
						CYK3	0.90173	0.48347
						NUP84	0.97409	0.9628
						IWR1	0.84633	0.52361
						YDL114W-A	0	0.57613
						YDL114W	1.0816	0.63107
						ATG20	0.94209	0.73993
						TRM3	0.98433	0.77031
						RRP42	0.77688	0.49551
						TMA17	1.5508	0.023028
						YDL109C	1.209	0.13038
						KIN28	1.2391	0.30311
						MSS2	0.39186	0.0099673
						PHO2	0.85519	0.65843
						NSE4	0.38114	0.39148
						QRI7	0.84529	0.31512
						QRI1	1.6006	0.16578
						POL3	1.4908	0.14328
						DUN1	1.3981	0.076496
						GET3	0.82824	0.49832
						BUG1	1.241	0.14443
						SNU23	0.98484	0.95388
						RPN6	0.29798	0.24646
						OPI6	0.93908	0.77719
						PMT1	0.91005	0.59897
						YDL094C	1.1858	0.2512
						PMT5	1.0156	0.67659
						SRP14	1.0478	0.87786
						UBX3	1.3076	0.038705
						RAM1	1.1351	0.7719
						NUR1	0.95033	0.6142
						ASM4	0.97615	0.88576
						LUC7	0.81758	0.50753
						YDL086W	0.95698	0.76246
						YDL086C-A	1.0685	0.7387
						YDL085C-A	0.66281	0.17663
						NDE2	1.2047	0.28823
						SUB2	1.6628	0.2638
						RPS16B	1.075	0.7725
						RPL13A	1.2347	0.26602
						RPP1A	0.70841	0.42959
						THI3	0.81515	0.218
						MRK1	0.92637	0.47278
						MDH3	0.87087	0.56305
						VAM6	0.21102	0.0053369
						RXT3	1.315	0.1593
						RPL31A	0.70667	0.70936
						BRE1	0.6955	0.42323
						YDL073W	0.69043	0.13954
						YET3	0.53064	0.010732
						YDL071C	1.1362	0.53299
						BDF2	1.1909	0.29356
						CBS1	0.46369	0.076375
						YDL068W	0.37557	0.13649
						COX9	0	0.098927
						IDP1	1.1026	0.39849
						PEX19	1.1632	0.43912
						UBC9	2.671	0.47995
						SYO1	0.92014	0.7413
						YDL062W	1.2227	0.27394
						RPS29B	0.79191	0.66462
						TSR1	0.79682	0.78941
						RAD59	0.87777	0.53946
						USO1	1.0943	0.48915
						YDL057W	1.3146	0.07523
						MBP1	0.95532	0.78524
						PSA1	1.464	0.64415
						MCH1	0.93254	0.33706
						PBP4	1.1301	0.60424
						SLC1	0.85199	0.32963
						LHP1	0.96468	0.83752
						YDL050C	0.93913	0.84309
						KNH1	0.93765	0.6254
						STP4	1.1358	0.16633
						SIT4	0.60025	0.14376
						NPC2	0.84237	0.28089
						MRP10	0.64175	0.15809
						FAD1	1.033	0.9495
						MTF2	0.62567	0.22538
						PRP11	1.0952	0.78519
						SIR2	1.1579	0.012662
						YDL041W	1.1319	0.17734
						NAT1	0.97287	0.80739
						PRM7	0.837	0.28909
						BSC1	0.7754	0.13029
						PUS9	0.86881	0.23119
						GPR1	0.71929	0.053095
						YDL034W	0.53185	0.11078
						SLM3	1.0649	0.67205
						YDL032W	0.92056	0.67548
						DBP10	1.055	0.8614
						PRP9	0.91559	0.80422
						ARP2	1.7809	0.17016
						MPS1	0.89235	0.78624
						YDL027C	1.0137	0.93457
						YDL026W	0.91754	0.84351
						RTK1	0.88712	0.48617
						YDL025W-A	0.22474	0.16549
						DIA3	1.0181	0.8785
						YDL022C-A	0.97271	0.80417
						YDL023C	0.77026	0.093896
						GPD1	0.87765	0.053407
						GPM2	1.1898	0.30005
						RPN4	0.96363	0.80946
						OSH2	0.83871	0.0085771
						ERP3	0.98541	0.92915
						CDC7	1.233	0.36759
						YDL016C	1.2694	0.089261
						TSC13	2.8315	0.45191
						NOP1	2.8315	0.45191
						SLX5	0.60197	0.14672
						YDL012C	1.0877	0.4626
						YDL011C	1.3109	0.01909
						GRX6	1.1216	0.3087
						YDL009C	1.1584	0.51536
						APC11	0.97041	0.8264
						YDL007C-A	0.99107	0.95352
						RPT2	1.3612	0.69798
						PTC1	0.37312	0.24003
						MED2	1.0957	0.62243
						ATP16	0.51948	0.37655
						MCD1	1.0563	0.58609
						NHP10	0.96178	0.85043
						RMD1	0.97657	0.8885
						NTH1	0.97592	0.8315
						YRB1	0.61455	0.11703
						RCR2	1.1128	0.51094
						YDR003W-A	1.3024	0.22643
						RAD57	1.1002	0.39543
						MAF1	0.60994	0.11707
						SOK1	0.94012	0.72453
						TRP1	1.1655	0.38165
						YDR008C	1.2505	0.30052
						GAL3	1.0433	0.72941
						YDR010C	0.95684	0.79843
						SNQ2	0.91999	0.30312
						RPL4B	1.0083	0.95377
						PSF1	1.357	0.69074
						RAD61	1.0183	0.86788
						HED1	0.65949	0.090069
						YDR015C	0.42217	0.069589
						DAD1	0.71431	0.5899
						KCS1	1.0284	0.72386
						YDR018C	0.96556	0.62675
						GCV1	0.98185	0.64337
						DAS2	1.0268	0.85161
						FAL1	0.7634	0.74183
						ATG31	0.81329	0.227
						SES1	0.82951	0.58088
						FYV1	1.2056	0.20987
						RPS11A	1.0191	0.96433
						NSI1	0.84744	0.29793
						VPS54	0.41897	0.14908
						REG1	0.97204	0.76467
						YDR029W	0.88964	0.73125
						RAD28	1.3128	0.025492
						MIX14	1.3912	0.34769
						PST2	1.115	0.39157
						MRH1	0.74911	0.091524
						LYS14	0.92884	0.75682
						YDR034C-A	1.0892	0.83798
						YDR034W-B	0.87225	0.70488
						ARO3	1.1233	0.067208
						EHD3	1.1471	0.099909
						KRS1	1.6573	0.20195
						ENA5	1.2986	0.13122
						ENA2	0	0.37818
						ENA1	1.1401	0.44792
						RSM10	0.86189	0.68028
						YDR042C	0.66921	0.26767
						NRG1	0.8345	0.28375
						HEM13	Inf	0.11739
						RPC11	3.4015	0.22688
						BAP3	1.2305	0.13778
						HEM12	1.4781	0.53365
						YDR048C	0.93823	0.54173
						VMS1	0.28049	0.16993
						TPI1	0.57093	0.4775
						DET1	1.5631	0.0032405
						DBF4	0.83945	0.85407
						YDR053W	NaN	NaN
						CDC34	2.5379	0.016269
						PST1	1.0732	0.6918
						YDR056C	1.1597	0.24187
						YOS9	0.89282	0.5222
						TGL2	0.93514	0.64819
						UBC5	0.79641	0.42953
						MAK21	1.0983	0.66691
						YDR061W	1.1429	0.36134
						LCB2	0.38456	0.54481
						AIM7	0.91322	0.41356
						RPS13	1.7282	0.62137
						RRG1	0.50362	0.20727
						RTR2	0.90985	0.58912
						OCA6	1.5196	0.03201
						DOS2	1.1567	0.48491
						DOA4	0.70502	0.49015
						FMP16	1.0725	0.80643
						PAA1	1.5167	0.24859
						IPT1	1.142	0.11019
						SNF11	1.1772	0.0076408
						TPS2	0.77406	0.31913
						PPH3	1.021	0.89148
						RAD55	1.0687	0.60845
						SED1	1.0185	0.94527
						SHU2	0.95944	0.86193
						PET100	0.66322	0.18248
						TFB5	0.34912	0.40304
						VPS41	0.17187	0.064512
						PDC2	0.95824	0.96333
						STN1	0.61896	0.4587
						RRP8	0.92508	0.63456
						TVP23	1.0612	0.83487
						AFR1	1.2644	0.22448
						SSS1	2.9405	0.12102
						RRP1	1.6789	0.57451
						SLU7	0.93623	0.57579
						YDR089W	0.98753	0.93356
						YDR090C	1.3989	0.14334
						RLI1	NaN	NaN
						UBC13	1.6157	0.12541
						DNF2	1.1297	0.097261
						YDR094W	1.0473	0.70775
						YDR095C	0.92243	0.74667
						GIS1	1.1435	0.60893
						MSH6	0.98159	0.76492
						GRX3	1.5274	0.098228
						BMH2	1.1455	0.18135
						TVP15	0.92183	0.65408
						ARX1	0.88382	0.516
						YDR102C	1.0327	0.81369
						STE5	0.98667	0.90703
						SPO71	1.1954	0.278
						TMS1	1.0623	0.7402
						ARP10	1.1611	0.33032
						TMN2	1.0486	0.7593
						TRS85	0.63075	0.15301
						YDR109C	0.85864	0.50948
						FOB1	0.99131	0.96051
						ALT2	0.96289	0.822
						IRC2	0.67261	0.16768
						PDS1	0.6797	0.042515
						YDR114C	1.0016	0.9947
						YDR115W	0.22981	0.086718
						MRPL1	1.2466	0.27342
						TMA64	0.89259	0.65786
						APC4	1.0629	0.76186
						YDR118W-A	0.95549	0.86015
						VBA4	0.95412	0.55367
						COX26	0.98545	0.97746
						TRM1	1.023	0.93336
						DPB4	1.1052	0.66507
						KIN1	1.2261	0.079299
						INO2	0.32914	0.5424
						YDR124W	1.1235	0.44929
						ECM18	1.0308	0.87455
						SWF1	0.99982	0.9996
						ARO1	0.8826	0.75461
						MTC5	1.0564	0.59224
						SAC6	0.95241	0.92919
						FIN1	0.77283	0.28254
						YDR131C	0.98897	0.93878
						YDR132C	1.1867	0.33017
						YDR133C	1.769	0.50475
						YCF1	1.2414	0.16958
						VPS61	1.2004	0.273
						RGP1	1.0245	0.96951
						HPR1	1.312	0.4188
						RUB1	1.3583	0.41213
						MTQ2	0.93921	0.90882
						DOP1	0.61729	0.32938
						PEX7	1.3567	0.14189
						SAN1	1.4485	0.16377
						MKC7	0.91378	0.60405
						TAF12	0.53603	0.10288
						SWI5	1.0534	0.77258
						EKI1	1.1322	0.26276
						KGD2	0.92032	0.7089
						YDR149C	0.98492	0.96666
						NUM1	0.95022	0.75697
						CTH1	1.6373	0.015381
						GIR2	0.96548	0.90418
						ENT5	1.3654	0.096701
						YDR154C	1.3464	0.44294
						CPR1	1.4915	0.38475
						RPA14	1.1498	0.16119
						YDR157W	1.152	0.38107
						HOM2	0.69182	0.18045
						SAC3	0.86404	0.53051
						SSY1	0	0.22553
						YDR161W	1.0117	0.97449
						NBP2	0.81372	0.65779
						CWC15	0.99682	0.99005
						SEC1	0.68591	0.72874
						TRM82	1.1985	0.15297
						SEC5	0.93884	0.41816
						TAF10	0.85428	0.70103
						CDC37	0.72489	0.57017
						STB3	1.2134	0.29609
						YDR169C-A	1.0374	0.91769
						SEC7	1.3089	0.494
						HSP42	0.92679	0.73973
						SUP35	1.583	0.51354
						ARG82	0.25815	0.26054
						HMO1	1.079	0.7688
						RSM24	0.25318	0.056696
						NGG1	0.77481	0.50105
						UBC1	1.0262	0.97902
						SDH4	1.263	0.52088
						CSN9	1.1527	0.62886
						YDR179W-A	1.4987	0.27367
						SCC2	0.68353	0.71399
						SAS4	1.2822	0.012103
						CDC1	0.92215	0.93016
						YDR182W-A	0.8798	0.58009
						PLP1	0.61489	0.013061
						YDR183C-A	1.3109	0.50621
						ATC1	1.1228	0.45851
						UPS3	0.74208	0.13972
						YDR186C	1.1537	0.68925
						YDR187C	1.0426	0.87229
						CCT6	1.1541	0.73874
						SLY1	1.1323	0.86795
						RVB1	Inf	0.11739
						HST4	1.0376	0.8657
						NUP42	1.0225	0.85117
						YDR193W	0.97052	0.878
						MSS116	0.34236	0.0068673
						YDR194W-A	0.48246	0.32385
						REF2	0.7996	0.42693
						CAB5	0.80702	0.79469
						CBS2	0.22317	0.0062944
						RKM2	0.7159	0.18526
						YDR199W	0.64204	0.19645
						VPS64	0.81298	0.4017
						SPC19	1.6367	0.29876
						RAV2	1.4287	0.17198
						YDR203W	0.7817	0.47527
						COQ4	0.51462	0.021316
						MSC2	1.2887	0.011983
						EBS1	1.0317	0.84779
						UME6	1.1164	0.63474
						MSS4	0.57355	0.043226
						YDR209C	1.2721	0.5967
						YDR210W	1.8598	0.37976
						GCD6	1.4797	0.45285
						TCP1	2.4751	0.51848
						UPC2	1.0152	0.94008
						AHA1	1.2609	0.40612
						YDR215C	1.1062	0.40561
						ADR1	1.3014	0.10651
						RAD9	0.85164	0.6393
						SPR28	1.0548	0.81965
						MFB1	0.51965	0.077576
						YDR220C	1.2198	0.47335
						GTB1	1.2687	0.1605
						YDR222W	1.756	0.0035343
						CRF1	1.3073	0.01575
						HTB1	1.2138	0.66353
						HTA1	1.5089	0.21975
						ADK1	0.67309	0.73012
						SIR4	1.2528	0.39091
						PCF11	0.74318	0.63437
						IVY1	1.2578	0.33972
						YDR230W	0.87693	0.34693
						COX20	0.5363	0.0022214
						HEM1	2.4166	0.13166
						RTN1	1.7561	0.13971
						LYS4	0.17791	0.19267
						PRP42	2.7388	0.011383
						FMN1	1.0758	0.94245
						MRPL7	0.14888	0.038576
						SEC26	4.1172	0.12749
						YDR239C	1.2297	0.28073
						SNU56	1.8421	0.19542
						BUD26	1.4128	0.2063
						AMD2	0.97015	0.84322
						PRP28	0	0.30419
						PEX5	1.0613	0.77019
						MNN10	1.1055	0.83439
						TRS23	1.3029	0.58643
						YDR246W-A	1.0855	0.60923
						VHS1	0.74089	0.26859
						YDR248C	0.87657	0.72586
						YDR249C	1.289	0.1003
						YDR250C	1.6152	0.017449
						PAM1	1.0613	0.7293
						BTT1	0.76323	0.52362
						MET32	1.2584	0.50117
						CHL4	1.8119	0.00027645
						RMD5	0.85178	0.62599
						CTA1	1.1867	0.3338
						RKM4	1.6161	0.1578
						HSP78	0.97912	0.94563
						YAP6	1.1756	0.46861
						SWM1	0.96847	0.77254
						EXG2	0.87563	0.21668
						YDR262W	0.92419	0.82063
						DIN7	1.0038	0.98039
						AKR1	0.53084	0.35573
						PEX10	1.0839	0.79939
						HEL2	0.74714	0.20194
						CIA1	0	0.062725
						MSW1	0.38637	0.12661
						YDR269C	2.1497	0.069239
						CCC2	1.1281	0.57055
						YDR271C	1.1176	0.56981
						GLO2	1.263	0.44086
						DON1	0.89917	0.67177
						YDR274C	1.0741	0.53379
						BSC2	0.9879	0.9655
						PMP3	0.568	0.41155
						MTH1	1.1689	0.3987
						YDR278C	1.1948	0.53962
						RNH202	1.2169	0.15594
						RRP45	0.29227	0.18764
						PHM6	1.2904	0.31362
						YDR282C	1.231	0.48997
						GCN2	0.89496	0.52167
						DPP1	1.0752	0.65046
						ZIP1	0.8732	0.56659
						YDR286C	0.95761	0.89855
						INM2	1.0744	0.86467
						NSE3	1.2442	0.78374
						RTT103	1.3137	0.5147
						YDR290W	1.0211	0.95789
						HRQ1	1.1814	0.39085
						SRP101	0.50785	0.7317
						SSD1	1.1226	0.37327
						DPL1	1.4568	0.53182
						HDA2	1.0723	0.78091
						MHR1	0.70439	0.3288
						SUR2	0.28443	0.061605
						ATP5	0.15025	0.003948
						BFR2	0.56261	0.59038
						PRO1	0.73444	0.34904
						CFT1	2.1565	0.41607
						GPI11	3.0924	0.053134
						RSC3	0.8768	0.85439
						CPR5	1.4183	0.24694
						HNT2	1.4932	0.087203
						YDR306C	1.1062	0.55387
						PMT7	1.058	0.6606
						SRB7	0.59881	0.69254
						GIC2	0.84503	0.085811
						SUM1	1.03	0.74117
						TFB1	1.1479	0.68465
						SSF2	1.1932	0.40997
						PIB1	0.85772	0.13553
						RAD34	0.94535	0.72093
						IPK1	1.0052	0.99013
						OMS1	0.90619	0.71442
						HIM1	0.97578	0.90812
						MCM21	1.437	0.21132
						YFT2	1.7406	0.066513
						SWA2	0.99505	0.99027
						DAD4	0	0.57613
						YDR320W-B	1.3405	0.12913
						ASP1	1.0066	0.98017
						MRPL35	0.29333	0.033423
						TIM11	0.65658	0.63757
						PEP7	1.0079	0.97718
						UTP4	1.1558	0.79767
						YCG1	0.31068	0.13136
						YSP2	1.032	0.84559
						YDR327W	1.1998	0.7269
						SKP1	1.4347	0.67139
						PEX3	1.0529	0.85831
						UBX5	0.9949	0.96867
						GPI8	0.36124	0.16094
						IRC3	0.42434	0.10158
						RQC1	0.86051	0.31245
						SWR1	1.8701	0.070091
						MSN5	1.0337	0.81445
						YDR336W	1.2154	0.4836
						MRPS28	0.56165	0.43048
						YDR338C	0.91182	0.44406
						FCF1	2.3077	0.16206
						YDR340W	1.1141	0.62867
						YDR341C	0	0.22637
						HXT7	0.99156	0.98934
						HXT6	0.40277	0.087094
						YDR344C	1.0005	0.99552
						HXT3	1.4168	0.076811
						SVF1	0.87617	0.42044
						MRP1	0.4214	0.25068
						PAL1	1.223	0.33173
						YPS7	0.79023	0.14824
						ATP22	0.84434	0.67308
						SBE2	1.3353	0.27266
						YPQ2	0.92907	0.65576
						TRR1	1.5219	0.44411
						TRP4	1.1169	0.77217
						YDR354C-A	2.735	0.37414
						YDR355C	NaN	NaN
						SPC110	1.3234	0.57268
						CNL1	1.0982	0.5726
						GGA1	0.82153	0.61827
						EAF1	0.83115	0.49279
						OPI7	1.3167	0.52546
						BCP1	1.2708	0.84076
						TFC6	1.7477	0.14403
						ESC2	1.0875	0.79521
						SEM1	0.9334	0.91209
						CDC40	0.7478	0.7121
						ESF1	1.7585	0.32692
						YDR366C	0.98542	0.91318
						KEI1	1.062	0.92399
						YPR1	1.011	0.95433
						XRS2	1.1327	0.42902
						DXO1	1.0368	0.79354
						CTS2	0.95778	0.85268
						YDR371C-A	0.64499	0.76662
						VPS74	1.3817	0.62324
						FRQ1	0.96406	0.97636
						PHO92	0.90855	0.57076
						WIP1	6.1521	0.21828
						BCS1	0.53485	0.14519
						ARH1	1.1739	0.68699
						ATP17	0.52128	0.10646
						LSM6	0.24655	0.44574
						RGA2	0.96912	0.84695
						SDH6	0.87305	0.62252
						ARO10	1.13	0.55938
						YRA1	0.46877	0.33823
						YDR381C-A	1.8142	0.40504
						RPP2B	0.93018	0.87771
						NKP1	0.93223	0.66135
						ATO3	1.2668	0.17521
						EFT2	0.27672	0.20533
						MUS81	0.99922	0.99678
						YDR387C	1.1594	0.34516
						RVS167	0.69091	0.21217
						SAC7	0.85176	0.4248
						UBA2	1.0433	0.91832
						YDR391C	1.0815	0.72109
						SPT3	0.71779	0.2048
						SHE9	0.8795	0.25945
						RPT3	7.7818	0.019955
						SXM1	0.6968	0.10314
						YDR396W	0.53343	0.11915
						NCB2	0.63035	0.24878
						UTP5	1.0795	0.83762
						HPT1	1.6987	0.094858
						URH1	0.99626	0.98709
						YDR401W	1.2066	0.15366
						DIT2	1.2366	0.1155
						DIT1	0.81797	0.077574
						RPB7	0	0.57613
						MRP20	0.46758	0.060761
						PDR15	1.0585	0.63639
						YDR406W-A	1.1748	0.53548
						TRS120	1.2104	0.63445
						ADE8	2.8597	0.14414
						SIZ1	1.091	0.57992
						STE14	1.3994	0.13075
						DFM1	1.2983	0.1448
						RRP17	1.8108	0.29049
						YDR413C	1.7836	0.39514
						ERD1	0.96213	0.78926
						YDR415C	1.3759	0.11499
						SYF1	1.3082	0.24096
						YDR417C	1.5074	0.54123
						RPL12B	1.898	0.45189
						RAD30	1.2811	0.28627
						HKR1	1.0497	0.43547
						ARO80	0.93079	0.73457
						SIP1	1.2877	0.15519
						CAD1	1.0499	0.79585
						DYN2	1.2076	0.37952
						SNX41	0.92084	0.53639
						YDR426C	0.80912	0.45469
						RPN9	0.16846	0.17224
						BNA7	0.88513	0.67785
						TIF35	0.36389	0.37439
						CYM1	1.0501	0.64209
						YDR431W	1.0225	0.85114
						NPL3	1.1578	0.85752
						YDR433W	1.2995	0.73359
						GPI17	1.2489	0.59127
						PPM1	0.79248	0.3761
						PPZ2	0.88916	0.65526
						GPI19	0.91656	0.79143
						THI74	1.0099	0.95644
						LRS4	0.49048	0.20568
						DOT1	1.2984	0.36111
						APT2	0.85759	0.11186
						YDR442W	1.9709	0.028115
						SSN2	2.3402	0.046469
						YDR444W	1.0971	0.5929
						YDR445C	0.84336	0.153
						ECM11	1.1624	0.58327
						RPS17B	0.78573	0.41127
						ADA2	0.73669	0.49301
						UTP6	4.5613	0.0047381
						RPS18A	1.497	0.10428
						YHP1	0.89618	0.42418
						PPN1	1.1703	0.37088
						TSA2	0.89344	0.35647
						GUK1	0	0.21731
						YDR455C	1.2341	0.27672
						NHX1	0.91997	0.76246
						TOM1	1.3493	0.25205
						HEH2	1.2423	0.19647
						PFA5	1.359	0.12141
						TFB3	0.38676	0.11824
						MFA1	0.94798	0.93025
						YDR461C-A	1.3275	0.50001
						MRPL28	0.79137	0.66328
						STP1	1.5364	0.18367
						SPP41	1.202	0.59448
						YDR464C-A	2.2277	0.014129
						RMT2	0.76276	0.091727
						PKH3	1.1273	0.33041
						YDR467C	1.0889	0.73637
						TLG1	0.56162	0.29397
						SDC1	0.78544	0.52534
						UGO1	0.2618	0.18368
						RPL27B	1.1165	0.70505
						TRS31	0.59148	0.38045
						PRP3	1.5458	0.16913
						JIP4	1.0338	0.83832
						YDR476C	1.0579	0.742
						SNF1	2.5515	0.001467
						SNM1	1.3715	0.78058
						PEX29	0.9203	0.75393
						DIG2	0.82264	0.3083
						PHO8	1.0697	0.78866
						CWC21	1.0247	0.81579
						KRE2	0.91323	0.74991
						VPS52	0.43967	0.091965
						VPS72	1.2733	0.09676
						VPS60	1.2939	0.20602
						RIB3	NaN	NaN
						PAC11	0.7701	0.067677
						SLD5	2.671	0.47995
						PKH1	1.0283	0.86906
						YDR491C	1.0301	0.69258
						IZH1	1.1738	0.29884
						MZM1	1.693	0.12879
						RSM28	1.0602	0.88658
						VPS3	0.91427	0.81338
						PUF6	0.95861	0.72029
						ITR1	1.201	0.42496
						SEC20	0.92892	0.7212
						LCD1	2.3834	0.022944
						RPL37B	1.3056	0.46952
						PLM2	1.1493	0.58008
						SAM2	0.95615	0.83024
						LPP1	1.4397	0.024759
						SPG3	1.0045	0.99184
						PSP1	1.3116	0.053873
						GMC1	1.0924	0.63014
						GIN4	1.1279	0.35318
						GNP1	1.0403	0.82348
						YDR509W	1.0181	0.95115
						SMT3	3.5189	0.36051
						YDR510C-A	1.3157	0.65354
						SDH7	1.1377	0.55519
						EMI1	1.181	0.063294
						GRX2	0.70442	0.13981
						YDR514C	1.1177	0.37764
						SLF1	1.2807	0.58418
						EMI2	0.9457	0.81747
						GRH1	1.0236	0.8766
						EUG1	0.76017	0.27843
						FPR2	0.97183	0.94806
						URC2	0.98442	0.90305
						YDR521W	0.97145	0.93235
						SPS2	1.1551	0.53557
						SPS1	1.264	0.14766
						AGE1	1.0233	0.90892
						YDR524W-C	1.0586	0.89701
						YDR524C-B	0.40862	0.37631
						YDR524C-A	1.0555	0.77581
						API2	1.0777	0.5873
						SNA2	0.7226	0.073423
						YDR526C	0	0.21316
						RBA50	1.5301	0.31677
						HLR1	0.95572	0.59905
						QCR7	0.78709	0.36568
						APA2	1.028	0.86086
						CAB1	2.6185	0.15994
						KRE28	0.85814	0.74369
						HSP31	1.0527	0.79674
						FIT1	0.94415	0.76477
						YDR535C	1.3163	0.071529
						STL1	0.91869	0.41181
						YDR537C	0.91894	0.83603
						PAD1	0.84413	0.63171
						FDC1	1.2003	0.56604
						IRC4	1.5162	0.064066
						YDR541C	0.97525	0.88662
						PAU10	1.1038	0.94027
						YDR543C	0.61346	0.20307
						YDR544C	0.9567	0.93609
						YRF1-1	NaN	NaN
						YDR545C-A	NaN	NaN
						YEL077C	1.0578	0.84301
						YEL077W-A	1.2946	0.67102
						YEL076C-A	NaN	NaN
						YEL076C	NaN	NaN
						YEL075W-A	1.0213	0.98631
						YEL075C	1.0213	0.98631
						YEL074W	0.99119	0.92425
						YEL073C	1.1515	0.56117
						RMD6	1.0608	0.75241
						DLD3	1.1785	0.24502
						DSF1	1.2676	0.09724
						HXT13	0.97403	0.89195
						YEL068C	0.78197	0.31958
						YEL067C	0.92715	0.45168
						HPA3	1.1001	0.70501
						SIT1	1.1873	0.26123
						AVT2	1.0784	0.62358
						CAN1	1.2909	0.22698
						NPR2	0.66725	0.25585
						CIN8	0.97785	0.9135
						PRB1	0.95147	0.79813
						SOM1	0.75421	0.25536
						HHY1	1.0447	0.73644
						PCM1	0.96987	0.96014
						YEL057C	0.90446	0.50038
						HAT2	1.1287	0.31137
						POL5	0.39451	0.21579
						RPL12A	0.63565	0.18858
						YEL053W-A	0.64635	0.22576
						MAK10	0.98057	0.86346
						AFG1	0.95714	0.85526
						VMA8	3.2855	0.083309
						YEL050W-A	1.4333	0.34822
						RML2	0.31721	0.034155
						PAU2	1.2597	0.20384
						TCA17	1.9735	0.064051
						FRD1	1.1286	0.3382
						GLY1	1.3966	0.66443
						YEL045C	0.96181	0.81805
						IES6	1.2203	0.66738
						YEL043W	1.0286	0.67836
						GDA1	0.99146	0.95895
						YEF1	1.0468	0.80191
						UTR2	0.93551	0.52202
						CYC7	0.90442	0.71339
						UTR4	0.95823	0.71863
						RAD23	0.81762	0.32972
						ANP1	1.1063	0.56433
						UTR5	1.051	0.56046
						YEL034C-A	0.76517	0.30356
						HYP2	0.68982	0.29174
						MTC7	1.0622	0.67195
						MCM3	0.30545	0.15034
						YEL032C-A	0	0.37818
						SPF1	0.79291	0.5043
						YEL030C-A	1.621	0.057031
						ECM10	0.92795	0.51236
						BUD16	0.90003	0.56656
						YEL028W	1.425	0.093201
						VMA3	1.7775	0.48034
						SNU13	1.269	0.79725
						YEL025C	1.0565	0.51834
						RIP1	0.36043	0.046247
						YEL023C	1.0806	0.30819
						GEA2	1.0321	0.69015
						URA3	1.0139	0.93832
						YEL020C-B	NaN	NaN
						TIM9	0.90496	0.79588
						YEL020C	0.9045	0.11705
						MMS21	1.0243	0.90932
						YEL018C-A	0.89428	0.67811
						EAF5	0.71435	0.35264
						PMP2	0.80545	0.47831
						GTT3	0.89322	0.5337
						NPP2	1.0929	0.31561
						EDC3	0.83995	0.093861
						YEL014C	1.0634	0.31726
						VAC8	0.93539	0.42876
						UBC8	1.1303	0.18436
						GLC3	1.0412	0.65454
						YEL010W	1.0734	0.67814
						YEL009C-A	1.0663	0.63039
						GCN4	1.0597	0.68901
						YEL008W	0.99607	0.98217
						YEL008C-A	0.88462	0.62728
						MIT1	0.89282	0.47734
						YEA6	1.0678	0.60914
						VAB2	0.97251	0.82002
						YEA4	1.015	0.82515
						GIM4	0.98787	0.89819
						WBP1	1.0095	0.96239
						IRC22	0.98984	0.9155
						MNN1	1.0127	0.89264
						NOP16	0.83163	0.57923
						PMI40	0.63342	0.37788
						FMP52	1.0886	0.41441
						YND1	1.1439	0.29118
						NUG1	1.1022	0.57511
						YER006C-A	1.0715	0.58679
						PAC2	1.1198	0.50645
						TMA20	1.1873	0.19421
						SEC3	0.93891	0.44415
						NTF2	Inf	0.11739
						YER010C	1.0258	0.84739
						TIR1	0.89034	0.35528
						PRE1	0.93913	0.79353
						PRP22	1.0572	0.67151
						HEM14	0.22452	0.13804
						BUD25	0.9916	0.92766
						FAA2	0.96041	0.33911
						BIM1	0.94481	0.48153
						AFG3	0.35435	0.023762
						SPC25	1.0307	0.89203
						ISC1	1.1632	0.42245
						SBH2	1.0418	0.88483
						GPA2	0.90195	0.13984
						RPN3	0.66468	0.13492
						SRB4	0.33531	0.024413
						PRO3	0.94269	0.90564
						YER023C-A	NaN	NaN
						YAT2	1.0155	0.8298
						GCD11	1.4236	0.45935
						CHO1	1.1334	0.84666
						GAL83	0.79651	0.16118
						MIG3	1.0207	0.82578
						SMB1	1.1073	0.35092
						CHZ1	1.1598	0.71583
						YPT31	0.98748	0.92522
						FIR1	0.99445	0.94948
						ZRG8	1.1255	0.18529
						YER034W	0.99212	0.94467
						EDC2	1.0243	0.85134
						ARB1	0.88127	0.83752
						PHM8	0.93906	0.57168
						KRE29	0.65261	0.45752
						YER038W-A	1.17	0.64152
						HVG1	1.1045	0.60774
						YER039C-A	1.2761	0.24464
						GLN3	1.1772	0.070311
						YEN1	0.97288	0.74606
						MXR1	0.82298	0.44598
						SAH1	3.4015	0.22688
						ERG28	2.9154	0.0056521
						MEI4	0.86168	0.34249
						ACA1	1.1154	0.34203
						SPO73	0.78628	0.28095
						YER046W-A	0.8321	0.52498
						SAP1	1.1368	0.42044
						CAJ1	1.0877	0.43554
						ISD11	0.40182	0.1981
						TPA1	1.3127	0.24357
						RSM18	0.3812	0.36309
						JHD1	1.1008	0.438
						HOM3	0.95424	0.81219
						PIC2	1.4407	0.0025441
						YER053C-A	0.51135	0.56888
						GIP2	0.96156	0.7098
						HIS1	0.97205	0.85071
						FCY2	1.1326	0.35648
						RPL34A	1.1548	0.6321
						HMF1	1.058	0.65734
						PET117	0.56754	0.11519
						PCL6	1.0199	0.92918
						FCY21	0.99026	0.93506
						FCY22	1.0603	0.66998
						CEM1	1.0454	0.61482
						GPP2	0.98828	0.83329
						THO1	0.93377	0.72159
						VHR2	0.77911	0.1717
						ICL1	1.0418	0.69856
						RRT13	0.51358	0.14108
						YER066C-A	0.80766	0.59012
						RGI1	1.241	0.38798
						YER067C-A	1.1217	0.65716
						MOT2	1.4752	0.011485
						YER068C-A	0.74845	0.070912
						ARG5%2C6	0.47763	0.10316
						RNR1	0.9877	0.96868
						TDA2	0.99471	0.9894
						VTC1	0.91091	0.70826
						ALD5	1.2577	0.11204
						RPS24A	0.84	0.8285
						YOS1	0	0.57613
						PTP3	1.0629	0.6713
						YER076C	0.92816	0.47843
						YER076W-A	0.96379	0.8931
						YER077C	0.7798	0.24647
						ICP55	1.0129	0.87714
						YER078W-A	1.0967	0.61733
						YER079W	1.0505	0.82984
						YER079C-A	1.0932	0.67565
						AIM9	1.0303	0.87515
						SER3	1.199	0.042206
						UTP7	1.8367	0.10605
						GET2	0.63821	0.31464
						YER084W	0.79644	0.12342
						YER084W-A	0.7999	0.5942
						YER085C	0.7999	0.5942
						ILV1	1.739	0.26689
						AIM10	0.30291	0.12963
						YER087C-A	0.37749	0.090692
						SBH1	0.98199	0.94539
						DOT6	1.0454	0.74638
						YER088C-A	0.96539	0.64193
						YER088W-B	0.97136	0.78205
						PTC2	0.98481	0.88903
						TRP2	0.95873	0.77128
						YER090C-A	0.66999	0.50154
						MET6	0.11971	0.0019826
						YER091C-A	0.81066	0.022318
						IES5	0.80178	0.23257
						TSC11	1.1502	0.42297
						AIM11	1.1306	0.49752
						PUP3	Inf	0.11739
						RAD51	1.2026	0.54109
						SHC1	1.1992	0.30263
						YER097W	0.95453	0.6815
						UBP9	0.84838	0.25083
						PRS2	1.1767	0.27774
						UBC6	1.2537	0.23628
						AST2	1.0168	0.93434
						RPS8B	0.88269	0.58286
						SSA4	1.1182	0.5885
						RTT105	0.80527	0.66207
						NUP157	0.88787	0.49016
						MAM1	1.0212	0.77644
						GLE2	1.7705	0.50496
						YER107W-A	0.67754	0.43364
						FLO8	1.2099	0.30334
						KAP123	1.1892	0.44373
						SWI4	1.0506	0.79758
						LSM4	1.9005	0.45631
						TMN3	1.0911	0.53015
						BOI2	0.98971	0.95548
						SPR6	0.78485	0.39936
						SLX8	0.92574	0.26971
						RPL23B	0.50224	0.46377
						SHO1	1.2463	0.31745
						AVT6	0.96742	0.86638
						YER119C-A	0.68849	0.059099
						SCS2	0.47502	0.0081749
						YER121W	1.1523	0.46472
						GLO3	1.065	0.66587
						YCK3	0.93583	0.8257
						DSE1	1.1926	0.057965
						RSP5	0.70948	0.82247
						NSA2	0.87712	0.89266
						LCP5	1.4327	0.56209
						VFA1	1.0475	0.88157
						SAK1	1.163	0.20466
						COM2	0.8644	0.070948
						RPS26B	1.1965	0.49568
						PMD1	1.0202	0.82955
						GLC7	0	0.014834
						YER133W-A	1.5846	0.29548
						YER134C	1.4921	0.016918
						YER135C	0.81369	0.54949
						GDI1	0.45741	0.52211
						YER137C	1.1704	0.42158
						YER137W-A	0.74151	0.30043
						YER138W-A	1.9837	0.30985
						RTR1	0.97325	0.9188
						EMP65	0.94684	0.79757
						COX15	0.42498	0.028952
						MAG1	0.91121	0.74864
						DDI1	0.96415	0.78157
						UBP5	0.92122	0.32755
						FTR1	1.0402	0.91341
						YER145C-A	0.77518	0.22911
						LSM5	0.88097	0.69527
						SCC4	1.1026	0.70424
						YER147C-A	1.3772	0.5458
						SPT15	1.4421	0.57096
						YER148W-A	1.2006	0.65373
						PEA2	1.1046	0.70083
						SPI1	1.6575	0.032165
						UBP3	0.72684	0.31107
						YER152C	1.1313	0.49236
						YER152W-A	1.1804	0.58201
						PET122	0.66475	0.098469
						OXA1	0.18848	0.013941
						BEM2	1.5384	0.1137
						YER156C	1.0108	0.96645
						COG3	0.88896	0.73835
						YER158C	0.99071	0.90947
						YER158W-A	0.7562	0.28555
						BUR6	0.54882	0.22128
						SPT2	0.65625	0.017642
						RAD4	0.8972	0.68288
						GCG1	1.4942	0.014252
						CHD1	0.94073	0.7925
						PAB1	1.9245	0.28874
						YER165C-A	1.007	0.98737
						DNF1	0.98989	0.94291
						BCK2	0.66198	0.15243
						CCA1	1.655	0.42155
						RPH1	0.95181	0.83828
						ADK2	0.97684	0.91795
						RAD3	0.98375	0.96977
						BRR2	0.79771	0.52313
						YER172C-A	1.8513	0.26725
						RAD24	1.3256	0.27703
						GRX4	0.93712	0.67898
						TMT1	1.0179	0.91163
						YER175W-A	1.3194	0.48231
						ECM32	1.0637	0.45797
						BMH1	0.88071	0.6735
						PDA1	1.1527	0.65706
						DMC1	0.90483	0.6672
						ISC10	0.94264	0.77705
						SLO1	1.6507	0.13325
						YER181C	0.70993	0.57173
						FMP10	0.90162	0.68155
						FAU1	1.3303	0.095495
						TOG1	0.99377	0.90433
						PUG1	1.021	0.92422
						YER186C	1.216	0.11794
						YER187W	0.96292	0.85753
						YER188W	1.2147	0.22941
						YER188C-A	0.89674	0.68347
						YER189W	0.93121	0.95828
						YRF1-2	0.93308	0.69713
						YER190C-A	NaN	NaN
						YER190C-B	NaN	NaN
						YFL068W	NaN	NaN
						YFL067W	1.5967	0.50998
						YFL066C	0.23067	0.23952
						YFL065C	0	0.43172
						YFL064C	3.0139	0.00023301
						YFL063W	0.9616	0.83057
						COS4	0.90783	0.78457
						DDI2	1.465	0.50776
						SNO3	1.2863	0.48966
						SNZ3	1.7165	0.11882
						THI5	0.50331	0.16114
						AAD16	1.0763	0.51668
						AAD6	1.2158	0.21476
						AGP3	1.0969	0.303
						YFL054C	1.1917	0.028941
						DAK2	0.99157	0.95416
						YFL052W	1.0877	0.61679
						YFL051C	1.0172	0.93243
						ALR2	1.0993	0.49097
						SWP82	1.0128	0.94513
						EMP47	1.3062	0.11683
						RGD2	1.0101	0.94249
						FMP32	0.66318	0.086063
						SEC53	0	0.40044
						OTU1	0.93244	0.66904
						YFL042C	1.0353	0.66372
						YFL041W-A	0.47892	0.035557
						FET5	1.1379	0.2315
						YFL040W	0.95855	0.70636
						ACT1	1.9891	0.63808
						YPT1	1.4296	0.75022
						TUB2	1.3029	0.67557
						RPO41	0.34518	0.070247
						MOB2	1.0029	0.98943
						RPL22B	1.3429	0.064863
						YFL034W	0.89939	0.27523
						RIM15	1.1796	0.49931
						YFL032W	1.1572	0.39878
						HAC1	1.0011	0.99396
						YFL031C-A	1.279	0.67387
						AGX1	0.92859	0.48714
						CAK1	6.1521	0.21828
						CAF16	0.81597	0.35769
						GYP8	1.0186	0.83229
						STE2	0.98888	0.76914
						BST1	0.94915	0.39714
						EPL1	0.94127	0.76901
						BUD27	0.93054	0.50459
						FRS2	1.4804	0.7184
						YFL021C-A	0.97859	0.79711
						GAT1	0.92255	0.42467
						PAU5	0.75826	0.43964
						YFL019C	0.97364	0.95718
						LPD1	0.90076	0.32985
						SMX2	0.50504	0.40709
						GNA1	1.6742	0.14589
						MDJ1	0.77621	0.36742
						YFL015W-A	1.0301	0.89826
						YFL015C	0.95805	0.77788
						HSP12	0.77721	0.25842
						YFL013W-A	1.0981	0.511
						IES1	1.0316	0.79498
						YFL012W-A	1.0574	0.77576
						YFL012W	1.0853	0.27771
						HXT10	0.94834	0.68625
						AUA1	1.199	0.081624
						WWM1	1.0836	0.50015
						CDC4	1.0596	0.81825
						SMC1	0.36049	0.37855
						BLM10	0.87336	0.15211
						SEC4	0	0.37792
						VTC2	0.98009	0.86603
						MSH4	0.97868	0.83072
						SPB4	1.3113	0.21527
						DEG1	1.102	0.2645
						LOC1	1.1492	0.65747
						NIC96	1.023	0.78522
						YPI1	0.63399	0.28967
						RPN11	1.081	0.79435
						SAD1	1.0398	0.88819
						YFR006W	0.92778	0.56057
						YFH7	1.0216	0.90281
						FAR7	0.65367	0.38361
[truncated: 4,576 more rows]

## Sheet: Yen1on vs. rest
positively selected						gene	fold_change	student_ttest
gene	fold_change	student_ttest				YAL069W	0.9363	0.70235
PTC1	2.7226	0.069179				YAL068W-A	1.4814	0.3772
MRPS28	3.045	0.0097753				PAU8	0.87988	0.84968
RSM18	3.4019	0.050971				YAL067W-A	1.3015	0.3518
DNA2	2.3917	0.023666				SEO1	1.0365	0.7086
MRPS16	2.218	0.037971				YAL066W	0.60393	0.24042
negatively selected						YAL065C	0.79959	0.046017
gene	fold_change	student_ttest				YAL064W-B	1.2447	0.60368
ERG4	0.45861	0.30381				TDA8	1.0648	0.78386
						YAL064W	0.6266	0.37319
						YAL063C-A	1.1515	0.76169
						FLO9	0.77948	0.20858
						GDH3	0.82917	0.17205
						BDH2	1.0752	0.56141
						BDH1	1.0268	0.79256
						YAL059C-A	1.1366	0.47225
						ECM1	1.3733	0.0079596
						CNE1	0.87123	0.44619
						YAL056C-A	0.76945	0.15432
						GPB2	0.94994	0.80997
						PEX22	0.7373	0.28054
						ACS1	0.88658	0.45091
						FLC2	0.86095	0.33167
						OAF1	0.87445	0.10922
						AIM2	0.8503	0.4047
						GEM1	1.0245	0.77086
						YAL047W-A	1.0801	0.78642
						SPC72	1.3987	0.11922
						AIM1	1.3328	0.21833
						YAL045C	1.0507	0.82553
						YAL044W-A	0.88952	0.73695
						GCV3	0.97877	0.88292
						PTA1	0.52806	0.14047
						YAL042C-A	0.80857	0.22368
						ERV46	0.88683	0.32553
						CDC24	1.7178	0.00096314
						CLN3	1.0727	0.76444
						CYC3	1.2167	0.62503
						CDC19	0.42931	0.3413
						YAL037C-B	0.9196	0.90576
						YAL037C-A	1.4423	0.028431
						YAL037W	0.95123	0.68039
						RBG1	0.87261	0.35633
						FUN12	0.68111	0.519
						YAL034C-B	0.73352	0.13893
						MTW1	0.93155	0.61398
						FUN19	1.0036	0.96438
						POP5	0.88018	0.77601
						PRP45	0.96123	0.85481
						YAL031W-A	1.0397	0.88086
						GIP4	0.87931	0.3148
						SNC1	0.77904	0.45627
						MYO4	0.91932	0.40345
						FRT2	1.026	0.80397
						SAW1	1.1642	0.42101
						YAL026C-A	1.5032	0.15215
						DRS2	1.2939	0.46227
						MAK16	0	0.089879
						LTE1	0.83783	0.64785
						PMT2	0.93736	0.72925
						FUN26	1.0305	0.77593
						CCR4	1.0748	0.79196
						ATS1	1.1628	0.43453
						YAL019W-A	1.0326	0.7908
						FUN30	1.0216	0.87147
						LDS1	1.139	0.54688
						PSK1	1.0869	0.047487
						YAL016C-B	1.2749	0.34678
						YAL016C-A	1.0052	0.98109
						TPD3	0.74536	0.67239
						NTG1	0.88068	0.44727
						SYN8	0.86538	0.47587
						DEP1	0.98526	0.91192
						CYS3	2.1582	0.2665
						SWC3	0.92363	0.71657
						MDM10	0.10389	0.48836
						SPO7	1.1968	0.32707
						FUN14	1.1062	0.54084
						ERP2	1.0575	0.15305
						SSA1	1.1399	0.29935
						YAL004W	1.1761	0.51128
						EFB1	1.2201	0.88702
						VPS8	1.0356	0.89223
						TFC3	0.98548	0.94255
						NUP60	1.1125	0.60735
						ERP1	1.0546	0.78745
						SWD1	0.93286	0.83766
						RFA1	1.5277	0.053445
						SEN34	0.61963	0.30008
						BUD14	1.0646	0.22864
						ADE1	0.79489	0.86318
						KIN3	1.2539	0.17479
						CDC15	0.84411	0.81615
						YAR019W-A	1.0879	0.56214
						PAU7	0.95143	0.87005
						YAR023C	0.96111	0.73134
						UIP3	1.2759	0.28174
						YAR028W	0.75537	0.42648
						YAR029W	1.1292	0.81956
						YAR030C	1.1276	0.59545
						PRM9	1.1409	0.57913
						MST28	1.0394	0.84595
						YAT1	1.0627	0.47383
						YAR035C-A	1.3029	0.31862
						SWH1	0.9326	0.6195
						YAR047C	1.1443	0.83292
						FLO1	0.99273	0.94851
						YAR053W	1.2785	0.47837
						YAR060C	NaN	NaN
						YAR064W	0.99963	0.99866
						YAR066W	1.8644	0.52019
						YAR068W	1.6147	0.47554
						YAR069C	NaN	NaN
						YAR070C	0.83345	0.81276
						PHO11	1.0903	0.89727
						IMD1	1.2547	0.60442
						YAR075W	1.6468	0.048775
						YBL113C	0.73377	0.36017
						YBL113W-A	0	0.36004
						YBL112C	NaN	NaN
						YBL111C	0	0.34742
						YBL109W	0.86213	0.67751
						PAU9	0	0.72097
						YBL108W	1.2494	0.41571
						YBL107W-A	0	0.44569
						MIX23	0.94296	0.79154
						SRO77	0.72218	0.038416
						PKC1	0.34564	0.29654
						SEA4	0.82392	0.45255
						RTG3	0.71383	0.37675
						SFT2	1.6321	0.14493
						ECM21	0.85391	0.211
						YBL100W-C	0.87637	0.79201
						YBL100C	0.95359	0.9667
						ATP1	2.102	0.4575
						BNA4	0.86258	0.60692
						BRN1	0.84961	0.45624
						YBL096C	0.90836	0.7917
						YBL095W	1.0114	0.96096
						YBL094C	1.0578	0.88706
						ROX3	0.7102	0.3791
						RPL32	0	0.72097
						SCS22	0.94329	0.894
						MAP2	0.76707	0.36783
						MRP21	0.75567	0.65221
						AVT5	0.89715	0.50203
						TEL1	0.96967	0.87543
						RPL23A	1.0773	0.64692
						YBL086C	0.87302	0.60966
						BOI1	0.96449	0.74737
						CDC27	0.72672	0.19733
						YBL083C	0.76362	0.52887
						ALG3	0.86579	0.54845
						YBL081W	1.223	0.36133
						PET112	1.7226	0.35886
						NUP170	0.93808	0.85046
						ATG8	1.953	0.21799
						YBL077W	0.73153	0.17544
						ILS1	0	0.45844
						SSA3	1.0102	0.93668
						AAR2	0.87464	0.58076
						YBL073W	1.0879	0.68605
						RPS8A	0.51112	0.27085
						YBL071C-B	0.96042	0.92646
						KTI11	1.6393	0.38822
						YBL071C	0.97262	0.92525
						YBL070C	0.794	0.66004
						AST1	1.2442	0.36416
						YBL068W-A	2.7828	0.05542
						PRS4	1.1735	0.48892
						UBP13	1.0808	0.47502
						SEF1	0.93651	0.79248
						YBL065W	0.50306	0.14717
						PRX1	1.2472	0.42624
						KIP1	0.85824	0.16018
						YBL062W	1.8574	0.066745
						SKT5	1.3378	0.14305
						YEL1	1.0951	0.52799
						CMC2	1.8204	0.35938
						YBL059W	1.695	0.015892
						SHP1	1.0518	0.9051
						PTH2	0.76391	0.23114
						PTC3	0.61685	0.16004
						YBL055C	1.2823	0.1068
						TOD6	0.78819	0.29965
						YBL053W	1.0226	0.94477
						SAS3	0.86851	0.2142
						PIN4	0.50817	0.10252
						SEC17	3.7283	0.34972
						MOH1	0.82405	0.63255
						RRT1	1.4393	0.20261
						EDE1	0.94258	0.7824
						PSY4	0.93309	0.68591
						COR1	1.1774	0.73511
						YBL044W	1.0572	0.46272
						ECM13	0.76647	0.35146
						FUI1	0.98777	0.9502
						PRE7	0	0.57905
						ERD2	1.4233	0.086765
						YBL039W-B	0.77086	0.71759
						URA7	0.9943	0.93374
						YBL039C-A	0.36247	0.44939
						MRPL16	1.4733	0.40594
						APL3	1.0347	0.79323
						YBL036C	0.95277	0.75296
						POL12	0.73829	0.4568
						STU1	0.97664	0.93408
						RIB1	1.1527	0.71656
						HEK2	0.84411	0.63985
						SHE1	0.96545	0.91801
						PET9	2.2094	0.094114
						YBL029C-A	1.1957	0.45619
						YBL029W	0.98034	0.91866
						YBL028C	0.99613	0.99055
						RPL19B	1.5247	0.29912
						LSM2	0	0.23527
						RRN10	0.87632	0.82317
						NCL1	0.99078	0.93957
						MCM2	1.2206	0.39474
						PIM1	1.5484	0.3357
						HAP3	1.0074	0.95066
						RFT1	0.55836	0.19451
						APN2	1.0598	0.52487
						POP8	1.2047	0.3991
						PEP1	0.99508	0.96571
						FUS3	1.0375	0.81167
						ACH1	1.0492	0.82452
						RRN6	1.0821	0.50318
						FMT1	1.0088	0.96872
						YBL012C	1.0722	0.75472
						SCT1	1.0486	0.71469
						YBL010C	1.0946	0.49584
						ALK2	0.95601	0.60984
						YBL008W-A	1.1754	0.42196
						HIR1	1.0981	0.28201
						SLA1	1.3269	0.38489
						LDB7	1.1246	0.66664
						YBL006W-A	1.2334	0.43899
						PDR3	1.1491	0.27419
						UTP20	1.6977	0.080585
						HTA2	1.0601	0.81397
						HTB2	0.92501	0.66529
						ECM15	1.0275	0.92364
						NTH2	1.0092	0.96281
						RER2	0.74123	0.4816
						COQ1	1.2485	0.65615
						GPI18	1.3506	0.73108
						RCR1	1.1217	0.47021
						UGA2	1.0109	0.94932
						DSF2	0.92166	0.55232
						FLR1	0.97284	0.787
						HHF1	1.1938	0.6863
						HHT1	0.92539	0.69631
						IPP1	1.4142	0.29188
						YBR012C	1.1766	0.45157
						YBR013C	0.99921	0.99609
						GRX7	0.8539	0.55098
						MNN2	1.1836	0.031769
						YBR016W	1.1497	0.40332
						KAP104	0.5422	0.020701
						GAL7	1.4476	0.74194
						GAL10	0.83011	0.63149
						GAL1	0.65745	0.4554
						FUR4	1.2171	0.34694
						POA1	1.1085	0.54846
						CHS3	1.4115	0.03112
						SCO2	1.0002	0.9991
						OLA1	0.76531	0.42132
						ETR1	1.2438	0.043902
						YBR027C	1.106	0.63168
						YPK3	1.1735	0.35403
						CDS1	1.3001	0.65681
						RKM3	1.0464	0.82746
						RPL4A	2.0587	0.017309
						YBR032W	1.4157	0.12146
						EDS1	0.8762	0.4811
						HMT1	0.94767	0.85258
						PDX3	0.95289	0.93588
						CSG2	1.173	0.86987
						SCO1	1.5153	0.38131
						CHS2	1.3039	0.62119
						ATP3	1.0991	0.93007
						FIG1	1.0463	0.89128
						FAT1	0.88566	0.48356
						CST26	1.0433	0.77002
						QDR3	0.98168	0.91424
						TCM62	0.98748	0.92581
						GIP1	1.0636	0.71326
						ZTA1	1.0842	0.69168
						FMP23	0.81615	0.025944
						RPS11B	0.70251	0.35022
						REB1	0.47814	0.44757
						REG2	0.91448	0.52442
						YBR051W	1.1042	0.74205
						RFS1	1.1463	0.58178
						YBR053C	1.0133	0.92013
						YRO2	0.74399	0.14212
						PRP6	1.2551	0.38841
						YBR056W	0.99172	0.97047
						YBR056W-A	0.64859	0.3657
						YBR056C-B	0.62582	0.3076
						MUM2	1.3764	0.1968
						UBP14	0.8897	0.66725
						TSC3	1.3561	0.6564
						AKL1	1.0427	0.74894
						ORC2	0.9252	0.82269
						TRM7	0.90086	0.76898
						YBR062C	0.98658	0.97209
						YBR063C	1.0945	0.60519
						YBR064W	0.7397	0.29405
						ECM2	0.87881	0.15037
						NRG2	1.3597	0.34305
						TIP1	1.0684	0.84781
						BAP2	1.14	0.83048
						TAT1	1.6224	0.30785
						ALG14	0	0.72097
						YBR071W	0.95783	0.8653
						HSP26	0.76218	0.47874
						YBR072C-A	1.1591	0.44568
						RDH54	0.64023	0.015186
						PFF1	0.82611	0.10566
						ECM8	1.0618	0.87227
						YBR076C-A	1.1869	0.50794
						SLM4	1.138	0.60191
						ECM33	0.82986	0.35144
						RPG1	1.0041	0.99013
						SEC18	0.27958	0.29302
						SPT7	0.86792	0.70463
						UBC4	1.3185	0.47278
						TEC1	1.1911	0.36363
						MIS1	0.92087	0.40295
						RPL19A	0.86461	0.57034
						AAC3	1.1131	0.79911
						YBR085C-A	0.68836	0.2367
						IST2	1.0883	0.7339
						RFC5	0	0.46752
						POL30	0	0.48507
						YBR089W	0	0.72097
						NHP6B	1.2845	0.10355
						YBR090C	1.1141	0.70602
						TIM12	NaN	NaN
						PHO3	1.0109	0.95327
						PHO5	0.79092	0.40728
						PBY1	0.90174	0.46292
						RXT2	0.69838	0.37408
						YBR096W	1.1199	0.38731
						VPS15	1.0495	0.83712
						MMS4	1.2553	0.14221
						YBR099C	1.3676	0.28777
						FES1	1.4813	0.13631
						EXO84	0.84547	0.61343
						SIF2	0.84606	0.61051
						YBR103C-A	0.93962	0.7357
						YMC2	0.78951	0.087067
						VID24	0.765	0.27767
						PHO88	1.0417	0.88842
						IML3	1.427	0.37548
						AIM3	0.9053	0.47895
						CMD1	0	0.57643
						YBR109W-A	1.127	0.80513
						ALG1	4.0425	0.059391
						YSA1	1.358	0.24478
						SUS1	2.4917	0.029062
						CYC8	1.0377	0.90866
						YBR113W	0.75432	0.6312
						RAD16	1.1305	0.36029
						LYS2	0.58979	0.60626
						YBR116C	1.191	0.43073
						TKL2	0.93661	0.6824
						TEF2	0.54812	0.62475
						MUD1	0.75143	0.5767
						CBP6	0.75393	0.62972
						GRS1	0	0.72097
						YBR121C-A	NaN	NaN
						MRPL36	0.90256	0.81147
						TFC1	1.6139	0.45976
						YBR124W	1.0795	0.59779
						PTC4	0.99937	0.99713
						TPS1	1.6783	0.34985
						YBR126W-A	0.66368	0.16659
						YBR126W-B	0.81615	0.47531
						VMA2	0.83516	0.5981
						ATG14	1.0085	0.98176
						OPY1	0.62977	0.20048
						SHE3	0.74572	0.46785
						CCZ1	0.74984	0.72245
						YBR131C-A	0	0.72097
						AGP2	0.95794	0.86367
						HSL7	0.89435	0.6546
						YBR134W	1.0594	0.80279
						CKS1	1.8221	0.27516
						MEC1	0.44334	0.25836
						YBR137W	0.88919	0.63272
						YBR138C	0.81212	0.23928
						YBR139W	0.76712	0.56144
						IRA1	0.82915	0.50237
						BMT2	1.1138	0.66424
						YBR141W-A	1.0466	0.94192
						MAK5	2.5287	0.034462
						SUP45	Inf	0
						YBR144C	0.72216	0.34608
						ADH5	1.0673	0.66492
						MRPS9	1.8512	0.3378
						RTC2	0.94817	0.87386
						YSW1	0.86224	0.51491
						ARA1	1.0384	0.88837
						TBS1	0.58	0.12704
						APD1	1.0896	0.63415
						SPP381	1.0405	0.90072
						RIB7	0	0.34229
						RPB5	5.2453	0.16949
						CNS1	0.77843	0.78001
						SLI15	0.68905	0.61121
						ICS2	0.67929	0.044072
						AMN1	0.75069	0.15519
						IFA38	1.2576	0.83197
						CDC28	3.3432	0.22345
						CSH1	1.3181	0.39089
						TOS1	0.57884	0.059508
						YSY6	3.0124	0.017372
						EXO5	1.9889	0.13836
						ARL1	0.7107	0.56933
						UBS1	1.6886	0.10695
						TYR1	0.45401	0.38628
						POP7	Inf	0
						PEX32	1.3043	0.27972
						SSE2	1.0413	0.85957
						NPL4	0.99127	0.97602
						SEC66	0.9932	0.9879
						SMY2	0.78596	0.43009
						UMP1	1.4589	0.60725
						YBR174C	0.80784	0.43571
						SWD3	1.1348	0.81688
						ECM31	0.9476	0.78589
						EHT1	0.90746	0.69948
						YBR178W	0.93539	0.75346
						FZO1	1.7894	0.28013
						DTR1	1.1409	0.58394
						RPS6B	0.82271	0.68474
						SMP1	1.104	0.65397
						YBR182C-A	1.4906	0.29001
						YPC1	1.1866	0.72307
						YBR184W	0.94762	0.80796
						MBA1	0.94063	0.87989
						PCH2	0.95013	0.79072
						GDT1	0.87597	0.76778
						NTC20	0.81198	0.36356
						RPS9B	0.74269	0.65028
						YBR190W	1.2904	0.49272
						RPL21A	0.31048	0.49616
						YBR191W-A	6.0282	0.034522
						RIM2	2.0014	0.34205
						MED8	0.68431	0.75062
						AIM4	0.80263	0.61821
						MSI1	0.9202	0.80561
						PGI1	Inf	0
						YBR196C-A	1.0554	0.76484
						YBR196C-B	0.82983	0.62431
						YBR197C	0.76424	0.34424
						TAF5	0	0.46527
						KTR4	0.76394	0.3096
						BEM1	1.2008	0.70881
						YBR200W-A	1.8049	0.44912
						DER1	1.4205	0.40276
						YBR201C-A	0.79103	0.6212
						MCM7	0.5472	0.32524
						COS111	0.96958	0.92756
						LDH1	0.79094	0.27701
						KTR3	1.2774	0.21416
						YBR206W	1.2405	0.31306
						FTH1	0.8894	0.59665
						DUR1%2C2	0.81373	0.42
						YBR209W	0.88819	0.063464
						ERV15	1.0039	0.99091
						AME1	0.90528	0.74258
						NGR1	0.81176	0.16119
						MET8	0.69794	0.18584
						SDS24	1.0377	0.85002
						HPC2	0.59167	0.24158
						YBP1	0.76313	0.33505
						ATG12	0.98186	0.94537
						PYC2	0.91036	0.12912
						YBR219C	1.068	0.48308
						YBR220C	0.98774	0.934
						PDB1	1.1196	0.65742
						YBR221W-A	1.0163	0.92474
						PCS60	1.0785	0.52885
						TDP1	1.048	0.63729
						YBR223W-A	0.87266	0.69619
						YBR224W	0.6628	0.22822
						YBR225W	1.0215	0.94471
						YBR226C	0.58871	0.30102
						MCX1	1.1522	0.54229
						SLX1	0.99874	0.9962
						ROT2	1.288	0.28335
						OM14	1.2593	0.64593
						YBR230W-A	0.78217	0.61194
						SWC5	0.91945	0.83817
						YBR232C	1.0813	0.75429
						PBP2	1.0858	0.668
						DAD3	5.2975	0.16524
						ARC40	0	0.72097
						VHC1	0.64761	0.047899
						ABD1	2.8635	0.10951
						PRP5	0.52761	0.6697
						YBR238C	1.2433	0.35643
						ERT1	1.0626	0.67581
						THI2	0.76643	0.40913
						YBR241C	0.55498	0.057118
						YBR242W	0.83235	0.59485
						ALG7	0.77205	0.85884
						GPX2	1.0236	0.94706
						ISW1	0.93526	0.78696
						RRT2	1.1066	0.76816
						ENP1	1.9339	0.3972
						HIS7	0.6852	0.14063
						ARO4	1.0066	0.97945
						SPO23	0.82238	0.38027
						MRPS5	1.3758	0.5456
						DUT1	0	0.50447
						SRB6	0.88699	0.85191
						TRS20	2.4859	0.42545
						MTC4	1.389	0.16171
						YBR255C-A	0.79971	0.6781
						RIB5	1.3181	0.65201
						POP4	6.0602	0.11401
						SHG1	0.56685	0.15553
						YBR259W	1.0818	0.3879
						RGD1	0.8566	0.55429
						TAE1	1.2178	0.23262
						MIC12	0.73243	0.55292
						SHM1	0.94891	0.72813
						YPT10	0.66691	0.066761
						TSC10	0.81043	0.7766
						REI1	1.255	0.4059
						SLM6	0.95616	0.95264
						MRPL37	2.2866	0.26314
						FMP21	0.65065	0.4048
						BIT2	1.0269	0.93009
						EFM2	0.97296	0.93612
						HSM3	0.77448	0.26927
						UBX7	0.72614	0.49307
						CHK1	0.67219	0.28405
						RIF1	1.0423	0.82706
						PPS1	1.0027	0.98911
						YBR277C	0.549	0.066934
						DPB3	1.2078	0.57972
						PAF1	1.0839	0.73589
						SAF1	1.1533	0.66999
						DUG2	1.0766	0.70804
						MRPL27	1.757	0.38395
						SSH1	1.0896	0.54787
						YBR284W	0.902	0.3093
						YBR285W	0.23559	0.25708
						APE3	0.8014	0.41943
						YBR287W	0.80217	0.19881
						APM3	1.1693	0.56618
						SNF5	1.0881	0.70407
						BSD2	1.0362	0.89425
						CTP1	0.9517	0.68059
						YBR292C	1.1635	0.59504
						VBA2	1.0673	0.76716
						SUL1	1.0314	0.80315
						PCA1	0.83045	0.44406
						PHO89	0.79215	0.27277
						YBR296C-A	1.114	0.81264
						MAL33	0.69429	0.035019
						MAL31	0.56329	0.22441
						YBR298C-A	1.0062	0.98559
						MAL32	0.44761	0.04604
						YBR300C	0.72809	0.55894
						PAU24	1.0387	0.94835
						COS2	0	0.52008
						YCL076W	1.3265	0.69336
						GEX1	0.88679	0.80689
						VBA3	1.0119	0.9907
						YCL068C	1.2326	0.81999
						HMLALPHA2	NaN	NaN
						HMLALPHA1	NaN	NaN
						YCL065W	0	0.72097
						CHA1	1.3647	0.54605
						VAC17	0.66828	0.024537
						MRC1	0.82762	0.55493
						KRR1	0.56913	0.55762
						FYV5	1.1348	0.6688
						ADF1	1.4	0.59571
						MIC10	0.90938	0.87786
						PRD1	0.88372	0.66943
						PEX34	0.83035	0.68708
						KAR4	1.1203	0.60617
						SPB1	0.5923	0.40927
						PBN1	0.97079	0.90216
						LRE1	0.82477	0.32981
						APA1	1.0976	0.71413
						YCL049C	1.0744	0.68101
						YCL048W-A	0.4699	0.10335
						SPS22	0.859	0.59266
						POF1	1.221	0.18789
						EMC1	1.0085	0.97616
						YCL046W	1.5308	0.24316
						MGR1	1.2193	0.48566
						PDI1	0.66386	0.73242
						YCL041C	1.0067	0.97776
						YCL042W	1.307	0.20529
						GLK1	0.96893	0.77116
						GID7	0.93621	0.73575
						ATG22	1.1469	0.25778
						SRO9	1.152	0.30558
						GFD2	1.2478	0.15179
						GRX1	0.94737	0.88391
						LSB5	0.96864	0.86363
						MXR2	1.3354	0.25932
						STE50	1.0445	0.75461
						RRP7	0.30446	0.31946
						HIS4	1.0098	0.94876
						BIK1	1.0314	0.88166
						RNQ1	0.79257	0.037513
						FUS1	0.90845	0.39894
						HBN1	1.1509	0.49591
						FRM2	0.98035	0.86377
						AGP1	1.0793	0.46209
						YCL023C	1.1246	0.48662
						KCC4	0.92946	0.49135
						YCL022C	1.1203	0.42672
						YCL021W-A	1.158	0.10458
						LEU2	NaN	NaN
						NFS1	0.4603	0.5782
						DCC1	1.0078	0.97178
						BUD3	0.98294	0.87705
						YCL012C	1.1488	0.51441
						GBP2	0.8705	0.36156
						SGF29	0.92063	0.79679
						ILV6	1.1208	0.40558
						STP22	1.1154	0.6366
						YCL007C	1.2874	0.12978
						VMA9	2.1363	0.079758
						LDB16	1.1318	0.63115
						PGS1	2.0404	0.12225
						YCL002C	1.1006	0.62421
						RER1	1.4472	0.38153
						YCL001W-A	1.4754	0.39984
						YCL001W-B	0.9476	0.79379
						YCR001W	1.0896	0.62394
						CDC10	1.2015	0.7491
						MRPL32	1.5213	0.097202
						YCP4	1.3096	0.18264
						CIT2	0.8458	0.27942
						YCR006C	1.05	0.86038
						YCR007C	1.1671	0.50086
						SAT4	0.9811	0.91668
						RVS161	1.8696	0.075676
						ADY2	1.1749	0.37317
						ADP1	1.0641	0.43342
						PGK1	0	0.13395
						YCR013C	0.44881	0.010005
						POL4	1.0944	0.34528
						YCR015C	1.0097	0.95993
						YCR016W	0.83777	0.39947
						CWH43	1.2069	0.13731
						SRD1	0.93093	0.82969
						YCR018C-A	1.3801	0.085733
						MAK32	0.9076	0.50107
						PET18	0.92634	0.74811
						MAK31	1.42	0.38317
						HTL1	2.0322	0.22833
						HSP30	0.88821	0.266
						YCR022C	1.0953	0.46974
						YCR023C	1.0752	0.41357
						SLM5	1.7151	0.28019
						YCR024C-B	0.75801	0.37079
						PMP1	1.543	0.023504
						YCR025C	0.92603	0.63784
						NPP1	1.0034	0.97942
						RHB1	1.5332	0.15569
						FEN2	0.74354	0.54963
						RIM1	2.109	0.28218
						SYP1	1.0233	0.91597
						RPS14A	0.93721	0.87199
						BPH1	1.1655	0.33456
						SNT1	0.71793	0.29296
						ELO2	2.0178	0.0094797
						RRP43	0	0.44618
						RBK1	1.0468	0.50862
						PHO87	0.84206	0.3446
						BUD5	1.0147	0.9739
						YCR038W-A	0.51331	0.11989
						MATALPHA2	3.2227	0.058843
						MATALPHA1	NaN	NaN
						YCR041W	0.71656	0.67486
						TAF2	1.725	0.11928
						YCR043C	0.90138	0.73769
						PER1	2.4064	0.23056
						RRT12	1.1192	0.28807
						YCR045W-A	1.1457	0.6285
						IMG1	1.3781	0.46869
						BUD23	1.0722	0.84322
						YCR047W-A	0.69312	0.813
						YCR049C	0.79693	0.21379
						ARE1	0.83781	0.23296
						YCR050C	0.83637	0.60331
						YCR051W	0.69887	0.21434
						RSC6	0.84443	0.72277
						THR4	1.3592	0.27886
						CTR86	0.43481	0.090442
						PWP2	1.1481	0.72819
						YIH1	0.74372	0.14651
						TAH1	1.7863	0.14185
						YCR061W	0.90209	0.46173
						YCR064C	0.71998	0.084336
						BUD31	1.0256	0.95235
						HCM1	0.87142	0.33128
						RAD18	0.7944	0.62593
						SED4	0.99315	0.96265
						ATG15	0.93145	0.68426
						CPR4	0.91555	0.70398
						IMG2	1.1652	0.84939
						RSA4	NaN	NaN
						SSK22	0.89053	0.43211
						SOL2	0.72827	0.061152
						ERS1	1.0977	0.64988
						YCR075W-A	1.8906	0.10223
						FUB1	0.62233	0.18682
						PAT1	1.5025	0.22963
						PTC6	1.1379	0.52281
						SRB8	0.42792	0.48998
						YCR081C-A	0.42313	0.62826
						AHC2	0.67583	0.41678
						TRX3	1.2326	0.38292
						TUP1	0.56499	0.497
						YCR085W	1.0358	0.9138
						CSM1	0.98393	0.9674
						YCR087W	1.0618	0.80362
						YCR087C-A	1.2264	0.4301
						ABP1	1.0078	0.95128
						FIG2	0.96098	0.8297
						YCR090C	0.91842	0.7936
						KIN82	1.0036	0.98532
						MSH3	0.78237	0.32803
						CDC39	0.87722	0.78045
						CDC50	0.65188	0.63344
						OCA4	0.92008	0.84969
						YCR095W-A	0.24362	0.31629
						HMRA2	NaN	NaN
						HMRA1	1.3535	0.71466
						YCR097W-A	1.6619	0.28892
						GIT1	0.87879	0.64417
						YCR099C	2.0104	0.12365
						YCR100C	0.79493	0.5123
						YCR101C	0.61816	0.27287
						YCR102C	1.0109	0.9733
						YCR102W-A	0.45998	0.53305
						PAU3	1.0869	0.75455
						ADH7	0.93731	0.82493
						RDS1	0.75793	0.33098
						AAD3	0.82991	0.66719
						YCR108C	0.54603	0.054305
						COS7	1.1208	0.85042
						YDL247W-A	0	0.72097
						MPH2	1.0594	0.96057
						SOR2	1.7225	0.55052
						HXT15	0.16761	0.10946
						THI13	1.1385	0.7576
						AAD4	0.61206	0.0022284
						YDL242W	1.3241	0.25574
						YDL241W	0.76322	0.61105
						YDL240C-A	1.0472	0.75278
						LRG1	1.0516	0.68395
						ADY3	0.86718	0.22194
						GUD1	0.75076	0.29369
						AIM6	1.0947	0.70805
						PHO13	0.89135	0.78126
						YPD1	0.80574	0.70364
						GYP7	1.0082	0.95478
						MFG1	1.124	0.63317
						OST4	0	0.72097
						BRE4	0.99058	0.92493
						PTP1	0.63255	0.15107
						SSB1	1.1942	0.46049
						YDL228C	1.311	0.30084
						HO	0.93849	0.78841
						GCS1	0.47573	0.0075686
						SHS1	0.93676	0.85425
						WHI4	0.71398	0.45708
						HBT1	0.97186	0.81596
						FMP45	1.5822	0.19949
						YDL221W	0.85589	0.46079
						CDC13	0.74973	0.18377
						DTD1	0.75072	0.72933
						YDL218W	1.2948	0.15207
						TIM22	1.1595	0.86646
						RRI1	0.76942	0.29652
						GDH2	0.93014	0.57013
						PRR2	0.96727	0.86245
						NOP6	0.82257	0.70523
						SHR3	1.2012	0.81739
						YDL211C	0.63653	0.072379
						UGA4	0.90542	0.57865
						CWC2	3.4238	0.12323
						NHP2	1.4142	0.12058
						GLE1	0.69802	0.31512
						YDL206W	0.73681	0.39316
						HEM3	6.149	0.007927
						RTN2	0.76098	0.1702
						ACK1	1.0047	0.97919
						MRPL11	1.0913	0.89315
						TRM8	1.0331	0.85058
						MGT1	0.43914	0.014452
						YDL199C	1.0895	0.68211
						GGC1	1.0671	0.92034
						ASF2	0.63039	0.057222
						YDL196W	0.92014	0.22047
						SEC31	0	0.22363
						SNF3	0.95873	0.83391
						NUS1	1.2307	0.76578
						ARF1	0.67577	0.38512
						RPL35A	0.46421	0.69907
						UFD2	0.63578	0.17343
						RBS1	0.99795	0.99471
						PPH22	0.74797	0.35329
						YDL187C	0.7683	0.51778
						YDL186W	1.0983	0.79989
						YDL185C-A	0.70469	0.6399
						VMA1	1.2002	0.70897
						RPL41A	0	0.72097
						YDL183C	0.96087	0.75303
						LYS20	0.69084	0.18222
						INH1	1.1732	0.56632
						YDL180W	0.98109	0.93609
						PCL9	0.74488	0.48881
						DLD2	1.0645	0.7463
						YDL177C	0.63671	0.23653
						YDL176W	1.0092	0.93763
						AIR2	0.93487	0.66604
						DLD1	0.87448	0.33761
						PAR32	1.2481	0.41476
						YDL172C	1.2946	0.34639
						GLT1	1.0406	0.79941
						UGA3	0.94683	0.37209
						UGX2	1.2972	0.2638
						SFA1	0.55993	0.12555
						NRP1	0.84596	0.59887
						FAP7	1.6815	0.51883
						CDC36	1.2887	0.7105
						CDC9	1.2641	0.56191
						YDL163W	1.3977	0.37314
						YDL162C	1.0325	0.74607
						ENT1	0.78642	0.27499
						MHF2	1.2273	0.66879
						DHH1	1.1489	0.78029
						YDL159W-A	0.88645	0.56529
						STE7	0.89951	0.41225
						YDL159C-B	0.56136	0.4529
						YDL158C	0.36293	0.24367
						YDL157C	0.92215	0.86877
						CMR1	0.74987	0.15957
						CLB3	0.87815	0.57785
						MSH5	1.1599	0.34887
						SAS10	1.3451	0.64359
						YDL152W	0.7904	0.43321
						BUD30	0.51235	0.54776
						RPC53	0.91581	0.92673
						ATG9	1.2081	0.5376
						NOP14	0.71692	0.10586
						RPN5	0.60218	0.62243
						LDB17	0.98103	0.95753
						COP1	0.51824	0.42176
						YDL144C	1.0394	0.87218
						CCT4	2.553	0.41012
						CRD1	0.71257	0.25409
						BPL1	0.98497	0.98657
						RPO21	1.5905	0.16033
						SCM3	0.71955	0.75074
						RGT2	0.95459	0.82163
						ARF2	1.1037	0.59202
						RPL35B	0.5353	0.25077
						RDI1	1.4856	0.092167
						PPH21	1.0408	0.80854
						RPL41B	2.095	0.4058
						SRF1	0.99938	0.99793
						CDC53	0.53252	0.3654
						LYS21	1.0667	0.74954
						STF1	1.1921	0.57768
						RPP1B	1.0374	0.8978
						YDL129W	1.1195	0.56669
						VCX1	0.66066	0.1972
						PCL2	0.99829	0.9948
						CDC48	1.5318	0.45616
						HNT1	0.74212	0.081795
						YDL124W	0.92562	0.67517
						SNA4	0.94514	0.85159
						UBP1	0.79737	0.5057
						YDL121C	0.65627	0.30155
						YFH1	0	0.43966
						YDL119C	1.1533	0.55456
						YDL118W	0.73794	0.57277
						CYK3	0.81758	0.29921
						NUP84	0.50024	0.44152
						IWR1	1.1266	0.70654
						YDL114W-A	0	0.72097
						YDL114W	0.77938	0.26093
						ATG20	0.71176	0.14312
						TRM3	0.88291	0.030593
						RRP42	1.023	0.9606
						TMA17	0.69436	0.33805
						YDL109C	0.90259	0.59804
						KIN28	1.288	0.32678
						MSS2	1.6473	0.2054
						PHO2	0.72869	0.51708
						NSE4	4.0141	0.018153
						QRI7	1.4377	0.0089118
						QRI1	0.71213	0.56372
						POL3	1.078	0.856
						DUN1	0.73246	0.34143
						GET3	0.65781	0.27722
						BUG1	0.83619	0.43817
						SNU23	1.3927	0.23782
						RPN6	0.62274	0.70255
						OPI6	1.0175	0.95093
						PMT1	1.0031	0.98929
						YDL094C	0.61259	0.0052629
						PMT5	0.97831	0.65075
						SRP14	1.1746	0.664
						UBX3	0.89294	0.6163
						RAM1	1.8928	0.12212
						NUR1	1.1847	0.11681
						ASM4	0.88085	0.56774
						LUC7	0.99715	0.99408
						YDL086W	0.90124	0.58597
						YDL086C-A	0.95321	0.85688
						YDL085C-A	1.4858	0.20838
						NDE2	0.98431	0.94988
						SUB2	0.88332	0.86312
						RPS16B	0.77307	0.46298
						RPL13A	0.94671	0.84385
						RPP1A	1.1092	0.84124
						THI3	1.1659	0.45157
						MRK1	1.0575	0.67915
						MDH3	1.3688	0.21094
						VAM6	1.0591	0.93168
						RXT3	1.0091	0.97543
						RPL31A	2.8796	0.13495
						BRE1	1.1915	0.73634
						YDL073W	0.80885	0.54792
						YET3	0.93782	0.86788
						YDL071C	1.2605	0.3414
						BDF2	1.2881	0.20069
						CBS1	0.92366	0.88716
						YDL068W	1.2549	0.73884
						COX9	1.0002	0.99989
						IDP1	0.83882	0.26523
						PEX19	0.75227	0.31259
						UBC9	0	0.57643
						SYO1	1.2709	0.39874
						YDL062W	0.94861	0.84409
						RPS29B	0.92996	0.91532
						TSR1	0.77096	0.82055
						RAD59	0.94472	0.83738
						USO1	0.83208	0.29948
						YDL057W	0.88965	0.64662
						MBP1	0.83753	0.42351
						PSA1	0	0.28355
						MCH1	0.92159	0.39653
						PBP4	1.3612	0.2432
						SLC1	1.2241	0.28344
						LHP1	0.83993	0.45287
						YDL050C	1.1194	0.77081
						KNH1	0.73379	0.045315
						STP4	0.90662	0.47136
						SIT4	0.89208	0.80569
						NPC2	0.78461	0.25781
						MRP10	1.2992	0.46718
						FAD1	0.42835	0.32436
						MTF2	1.553	0.25534
						PRP11	0.55713	0.24853
						SIR2	0.92635	0.47146
						YDL041W	0.98147	0.88984
						NAT1	0.8432	0.23261
						PRM7	1.2724	0.19453
						BSC1	1.107	0.6451
						PUS9	1.072	0.65019
						GPR1	1.3721	0.098986
						YDL034W	0.54855	0.30786
						SLM3	1.1611	0.40424
						YDL032W	1.1502	0.55368
						DBP10	0.83627	0.67261
						PRP9	1.2992	0.51574
						ARP2	1.4626	0.50374
						MPS1	0.81495	0.71836
						YDL027C	1.0401	0.85255
						YDL026W	1.9477	0.074578
						RTK1	0.93821	0.77804
						YDL025W-A	0.47127	0.57135
						DIA3	1.0604	0.69238
						YDL022C-A	0.88546	0.39935
						YDL023C	0.91948	0.70894
						GPD1	0.90694	0.33464
						GPM2	0.8319	0.4553
						RPN4	0.92313	0.69119
						OSH2	1.0799	0.48511
						ERP3	1.185	0.37661
						CDC7	0.59181	0.13566
						YDL016C	0.89499	0.6256
						TSC13	5.2975	0.16524
						NOP1	5.2975	0.16524
						SLX5	1.7688	0.063857
						YDL012C	1.1185	0.43695
						YDL011C	1.0515	0.80459
						GRX6	1.2372	0.090592
						YDL009C	1.3792	0.2016
						APC11	1.213	0.19943
						YDL007C-A	1.0914	0.64543
						RPT2	1.8272	0.48917
						PTC1	2.7226	0.069179
						MED2	1.1193	0.63121
						ATP16	2.515	0.086648
						MCD1	1.1249	0.33336
						NHP10	1.0108	0.96743
						RMD1	0.88991	0.60154
						NTH1	1.0118	0.93619
						YRB1	1.032	0.93755
						RCR2	1.0747	0.73502
						YDR003W-A	1.1205	0.71056
						RAD57	1.0245	0.87374
						MAF1	0.59258	0.26089
						SOK1	0.97604	0.91476
						TRP1	1.1323	0.58764
						YDR008C	1.1697	0.58593
						GAL3	0.93837	0.69667
						YDR010C	0.9641	0.87053
						SNQ2	0.96046	0.71275
						RPL4B	0.87473	0.4782
						PSF1	2.8788	0.10925
						RAD61	1.0964	0.49115
						HED1	1.391	0.23129
						YDR015C	1.3679	0.5422
						DAD1	2.0346	0.19166
						KCS1	1.0747	0.46263
						YDR018C	1.1107	0.20364
						GCV1	1.0239	0.63921
						DAS2	1.0136	0.94117
						FAL1	1.8563	0.42987
						ATG31	1.1749	0.4396
						SES1	0.72161	0.48462
						FYV1	1.0925	0.6719
						RPS11A	0.78039	0.67572
						NSI1	1.1495	0.47308
						VPS54	2.0192	0.15475
						REG1	0.99669	0.97839
						YDR029W	1.2371	0.58872
						RAD28	0.93785	0.76814
						MIX14	0.7937	0.67248
						PST2	0.9622	0.82734
						MRH1	1.036	0.8815
						LYS14	0.81352	0.51964
						YDR034C-A	0.98796	0.98252
						YDR034W-B	1.7767	0.067364
						ARO3	0.97855	0.82951
						EHD3	0.93663	0.61206
						KRS1	0.88128	0.84314
						ENA5	1.023	0.93116
						ENA2	7.4567	0.058625
						ENA1	1.1652	0.48324
						RSM10	1.0168	0.97063
						YDR042C	1.723	0.095004
						NRG1	0.75901	0.22484
						HEM13	0	0.72097
						RPC11	0	0.46583
						BAP3	0.82578	0.37856
						HEM12	0.59748	0.62735
						YDR048C	1.0866	0.51915
						VMS1	0.63019	0.67599
						TPI1	1.1783	0.84884
						DET1	0.84194	0.60762
						DBF4	2.0418	0.42741
						YDR053W	NaN	NaN
						CDC34	0.57554	0.54707
						PST1	1.3136	0.15525
						YDR056C	0.73684	0.075123
						YOS9	0.94252	0.79881
						TGL2	0.7946	0.22556
						UBC5	0.65059	0.28416
						MAK21	1.2372	0.41117
						YDR061W	1.0547	0.78858
						LCB2	0	0.45918
						AIM7	1.0594	0.6835
						RPS13	0	0.45091
						RRG1	1.7005	0.29481
						RTR2	1.2246	0.305
						OCA6	0.80598	0.55492
						DOS2	0.92092	0.77797
						DOA4	0.69368	0.59908
						FMP16	1.6156	0.074955
						PAA1	0.73516	0.60615
						IPT1	0.85371	0.19516
						SNF11	0.89571	0.3335
						TPS2	1.0028	0.99317
						PPH3	1.0582	0.76945
						RAD55	1.037	0.83029
						SED1	1.212	0.54413
						SHU2	1.1212	0.69371
						PET100	0.78683	0.57329
						TFB5	0.84749	0.90322
						VPS41	0.79719	0.81718
						PDC2	0.7103	0.79829
						STN1	1.3079	0.69859
						RRP8	1.2537	0.20443
						TVP23	0.62335	0.25167
						AFR1	0.93278	0.80995
						SSS1	2.0497	0.4237
						RRP1	1.5272	0.71041
						SLU7	1.1467	0.31986
						YDR089W	0.71075	0.061663
						YDR090C	0.96939	0.93086
						RLI1	NaN	NaN
						UBC13	0.71894	0.55046
						DNF2	0.90553	0.3746
						YDR094W	0.93531	0.68415
						YDR095C	1.1761	0.58391
						GIS1	1.1113	0.75495
						MSH6	1.0286	0.72053
						GRX3	1.0006	0.99877
						BMH2	0.90367	0.5005
						TVP15	1.2704	0.22607
						ARX1	1.2482	0.29825
						YDR102C	0.93012	0.68945
						STE5	0.88095	0.3945
						SPO71	0.74406	0.21971
						TMS1	0.94711	0.8236
						ARP10	0.7515	0.18839
						TMN2	0.89238	0.58411
						TRS85	0.91226	0.83057
						YDR109C	0.9345	0.82237
						FOB1	0.61877	0.019792
						ALT2	0.91562	0.68972
						IRC2	1.0983	0.79513
						PDS1	1.0975	0.72722
						YDR114C	0.80535	0.50291
						YDR115W	1.7219	0.43625
						MRPL1	0.68326	0.21326
						TMA64	0.98253	0.95722
						APC4	1.0571	0.82998
						YDR118W-A	1.0897	0.78818
						VBA4	0.97789	0.82959
						COX26	0.47319	0.37239
						TRM1	1.0593	0.86761
						DPB4	0.7069	0.29057
						KIN1	1.0048	0.97925
						INO2	0.34792	0.68611
						YDR124W	0.86382	0.49772
						ECM18	0.94722	0.83119
						SWF1	1.2643	0.56729
						ARO1	0.69544	0.51827
						MTC5	0.98211	0.89494
						SAC6	0.90359	0.889
						FIN1	0.87074	0.66875
						YDR131C	0.85874	0.42169
						YDR132C	0.56258	0.0079419
						YDR133C	0.83337	0.89134
						YCF1	0.76728	0.27418
						VPS61	0.78603	0.32922
						RGP1	1.9465	0.28042
						HPR1	1.2714	0.57505
						RUB1	1.8006	0.12479
						MTQ2	1.1314	0.85313
						DOP1	1.2713	0.65957
						PEX7	0.93514	0.83727
						SAN1	0.67909	0.39209
						MKC7	1.0252	0.91032
						TAF12	1.4449	0.36997
						SWI5	0.8113	0.39242
						EKI1	0.75757	0.05195
						KGD2	0.67013	0.17915
						YDR149C	0.53249	0.24958
						NUM1	0.87533	0.5406
						CTH1	1.0208	0.95707
						GIR2	1.0101	0.97847
						ENT5	1.1734	0.56265
						YDR154C	0.37235	0.16195
						CPR1	0.47508	0.37448
						RPA14	0.91574	0.55444
						YDR157W	1.037	0.86923
						HOM2	0.85326	0.67325
						SAC3	0.74492	0.35063
						SSY1	4.3586	0.10654
						YDR161W	1.607	0.19239
						NBP2	0.82239	0.75192
						CWC15	0.79032	0.50163
						SEC1	0	0.3431
						TRM82	0.93012	0.70732
						SEC5	0.98416	0.87722
						TAF10	1.3578	0.49817
						CDC37	1.6122	0.39669
						STB3	1.1093	0.68057
						YDR169C-A	1.3187	0.49884
						SEC7	0.95343	0.93204
						HSP42	0.75988	0.37434
						SUP35	0.81121	0.84753
						ARG82	0	0.28303
						HMO1	1.0275	0.93594
						RSM24	1.4619	0.5704
						NGG1	1.2229	0.64441
						UBC1	0	0.33689
						SDH4	0.73053	0.57085
						CSN9	0.78855	0.57516
						YDR179W-A	1.1703	0.76112
						SCC2	2.384	0.32343
						SAS4	0.82099	0.28619
						CDC1	1.8731	0.49726
						YDR182W-A	1.1017	0.7327
						PLP1	1.2903	0.33682
						YDR183C-A	2.1696	0.021239
						ATC1	1.1425	0.50114
						UPS3	1.2427	0.3703
						YDR186C	0.69421	0.49387
						YDR187C	0.64916	0.23934
						CCT6	0.48227	0.30268
						SLY1	1.121	0.90437
						RVB1	0	0.72097
						HST4	0.74025	0.31606
						NUP42	0.84918	0.28617
						YDR193W	1.3411	0.14538
						MSS116	1.4564	0.41972
						YDR194W-A	1.079	0.92578
						REF2	0.81728	0.59415
						CAB5	0.29335	0.42326
						CBS2	1.3903	0.57787
						RKM2	1.0514	0.87749
						YDR199W	1.0329	0.9402
						VPS64	0.96309	0.90654
						SPC19	1.3746	0.61153
						RAV2	1.0613	0.87899
						YDR203W	0.91283	0.83813
						COQ4	1.1439	0.73089
						MSC2	0.95784	0.82016
						EBS1	0.79238	0.28065
						UME6	0.88325	0.69931
						MSS4	1.0769	0.84234
						YDR209C	0.8004	0.74107
						YDR210W	0.6136	0.69685
						GCD6	0	0.061223
						TCP1	6.0602	0.11401
						UPC2	0.76121	0.31459
						AHA1	0.91469	0.82521
						YDR215C	0.90237	0.5434
						ADR1	0.70822	0.19007
						RAD9	0.60857	0.30974
						SPR28	0.76828	0.41768
						MFB1	0.84425	0.73842
						YDR220C	1.2172	0.57572
						GTB1	0.95831	0.86931
						YDR222W	0.66482	0.37047
						CRF1	0.73194	0.11505
						HTB1	1.092	0.88044
						HTA1	0.59841	0.381
						ADK1	1.8602	0.5657
						SIR4	1.1874	0.61648
						PCF11	1.6063	0.44966
						IVY1	0.99025	0.97719
						YDR230W	1.0767	0.67706
						COX20	1.0654	0.85195
						HEM1	0.4386	0.52212
						RTN1	1.2843	0.65111
						LYS4	0.40067	0.56751
						PRP42	0.84263	0.84257
						FMN1	0	0.35687
						MRPL7	2.5439	0.093084
						SEC26	0	0.44625
						YDR239C	0.75463	0.32981
						SNU56	0.54191	0.49755
						BUD26	0.93496	0.87306
						AMD2	0.82288	0.33114
						PRP28	1.5034	0.80041
						PEX5	0.66695	0.14192
						MNN10	1.7525	0.24913
						TRS23	2.2084	0.067974
						YDR246W-A	0.98228	0.93378
						VHS1	1.1609	0.64858
						YDR248C	0.74378	0.568
						YDR249C	0.95562	0.85335
						YDR250C	0.96095	0.91698
						PAM1	0.79704	0.33083
						BTT1	0.5719	0.3641
						MET32	0.79748	0.65615
						CHL4	0.67974	0.39653
						RMD5	0.82653	0.66527
						CTA1	0.81861	0.43993
						RKM4	0.73789	0.60422
						HSP78	0.4717	0.09603
						YAP6	0.64183	0.17351
						SWM1	1.2626	0.019924
						EXG2	1.1719	0.21254
						YDR262W	0.549	0.24005
						DIN7	0.75639	0.15246
						AKR1	0.8288	0.82458
						PEX10	0.57529	0.24362
						HEL2	1.1652	0.58591
						CIA1	2.0971	0.3966
						MSW1	2.1129	0.1268
						YDR269C	0.90199	0.89179
						CCC2	1.1033	0.72013
						YDR271C	1.0982	0.7108
						GLO2	0.64797	0.35926
						DON1	1.1537	0.63356
						YDR274C	0.84849	0.28384
						BSC2	0.62857	0.24372
						PMP3	2.6364	0.040667
						MTH1	0.67271	0.12998
						YDR278C	0.98077	0.96123
						RNH202	0.65522	0.023029
						RRP45	0.61096	0.66289
						PHM6	1.1616	0.6603
						YDR282C	1.1221	0.77201
						GCN2	0.78605	0.29352
						DPP1	0.87595	0.54342
						ZIP1	1.2893	0.33242
						YDR286C	0.50961	0.18159
						INM2	0.67539	0.52918
						NSE3	0	0.24383
						RTT103	1.2008	0.73662
						YDR290W	1.5353	0.30493
						HRQ1	0.7607	0.33449
						SRP101	1.0511	0.98134
						SSD1	0.98827	0.94777
						DPL1	1.8745	0.33752
						HDA2	1.3119	0.34224
						MHR1	1.3747	0.41189
						SUR2	1.3215	0.67735
						ATP5	1.5021	0.51972
						BFR2	2.8809	0.17978
						PRO1	1.6331	0.10942
						CFT1	0	0.39637
						GPI11	1.2961	0.78826
						RSC3	0.49645	0.53805
						CPR5	1.3319	0.46673
						HNT2	0.66662	0.33323
						YDR306C	0.8972	0.64521
						PMT7	0.92233	0.63919
						SRB7	0	0.41752
						GIC2	0.99976	0.99867
						SUM1	0.8876	0.29976
						TFB1	1.2157	0.64162
						SSF2	0.52789	0.031159
						PIB1	1.0784	0.58575
						RAD34	0.63413	0.0060477
						IPK1	0.93721	0.90654
						OMS1	0.9989	0.99744
						HIM1	1.3281	0.21131
						MCM21	0.69547	0.45209
						YFT2	0.77701	0.6498
						SWA2	0.89792	0.84328
						DAD4	0	0.72097
						YDR320W-B	0.69722	0.25543
						ASP1	0.47785	0.042205
						MRPL35	2.1196	0.099955
						TIM11	0.29858	0.44605
						PEP7	1.3655	0.29931
						UTP4	0.74054	0.71887
						YCG1	1.7249	0.41128
						YSP2	0.91792	0.6907
						YDR327W	1.0407	0.95412
						SKP1	0.52518	0.66497
						PEX3	0.67906	0.34933
						UBX5	1.1732	0.28396
						GPI8	1.4191	0.6162
						IRC3	1.3673	0.57065
						RQC1	0.83434	0.36611
						SWR1	0.73316	0.63404
						MSN5	0.96787	0.86049
						YDR336W	1.108	0.78109
						MRPS28	3.045	0.0097753
						YDR338C	0.91463	0.57694
						FCF1	0	0.18987
						YDR340W	0.86124	0.63145
						YDR341C	0	0.4572
						HXT7	0	0.098915
						HXT6	0.83768	0.7926
						YDR344C	0.87202	0.18496
						HXT3	0.94069	0.85166
						SVF1	1.0352	0.86942
						MRP1	1.5602	0.52646
						PAL1	0.69136	0.23499
						YPS7	1.066	0.76826
						ATP22	0.85861	0.77337
						SBE2	0.86194	0.71222
						YPQ2	1.1764	0.39852
						TRR1	0.49632	0.48087
						TRP4	1.088	0.86364
						YDR354C-A	0	0.49646
						YDR355C	NaN	NaN
						SPC110	1.2179	0.75807
						CNL1	0.75493	0.21446
						GGA1	0.59233	0.35862
						EAF1	1.0566	0.86972
						OPI7	1.1644	0.78946
						BCP1	0	0.4573
						TFC6	1.6789	0.27996
						ESC2	0.86792	0.75066
						SEM1	0.52181	0.50797
						CDC40	1.5939	0.56033
						ESF1	0	0.1267
						YDR366C	1.2085	0.20212
						KEI1	1.8339	0.34215
						YPR1	0.87433	0.59968
						XRS2	1.0687	0.75167
						DXO1	1.0106	0.95305
						CTS2	0.74031	0.34077
						YDR371C-A	0	0.48775
						VPS74	1.286	0.76323
						FRQ1	0	0.44618
						PHO92	0.93276	0.75382
						WIP1	0	0.61823
						BCS1	1.4643	0.39507
						ARH1	1.8704	0.093173
						ATP17	0.63898	0.44005
						LSM6	7.4772	0.0015233
						RGA2	0.82284	0.36207
						SDH6	0.85502	0.66928
						ARO10	0.63594	0.12259
						YRA1	0.97199	0.97474
						YDR381C-A	2.8403	0.1189
						RPP2B	2.123	0.047396
						NKP1	1.275	0.15081
						ATO3	0.73704	0.26153
						EFT2	1.6921	0.52529
						MUS81	1.0339	0.89223
						YDR387C	0.76552	0.23091
						RVS167	0.82454	0.63311
						SAC7	0.92192	0.75962
						UBA2	0.35755	0.13979
						YDR391C	0.6028	0.091548
						SPT3	1.0516	0.88052
						SHE9	1.026	0.86528
						RPT3	1.9276	0.62146
						SXM1	0.83472	0.56932
						YDR396W	0.65259	0.45798
						NCB2	0.48569	0.22701
						UTP5	0.76462	0.61468
						HPT1	0.84048	0.75318
						URH1	1.3845	0.17764
						YDR401W	0.76831	0.18007
						DIT2	0.74848	0.1625
						DIT1	1.0306	0.8539
						RPB7	Inf	0
						MRP20	0.86063	0.78345
						PDR15	0.776	0.090339
						YDR406W-A	1.2621	0.46254
						TRS120	1.7976	0.14035
						ADE8	0	0.30451
						SIZ1	0.71995	0.11298
						STE14	0.71152	0.36288
						DFM1	0.77439	0.37198
						RRP17	1.1108	0.89834
						YDR413C	1.035	0.97254
						ERD1	1.0277	0.88163
						YDR415C	0.5999	0.13094
						SYF1	1.0529	0.87571
						YDR417C	1.2922	0.76812
						RPL12B	2.1649	0.41278
						RAD30	0.5789	0.13106
						HKR1	0.94795	0.52297
						ARO80	0.91949	0.76226
						SIP1	0.99944	0.99833
						CAD1	1.0383	0.87703
						DYN2	0.76792	0.40655
						SNX41	1.27	0.075529
						YDR426C	1.3337	0.35287
						RPN9	1.4192	0.72704
						BNA7	0.85108	0.68021
						TIF35	3.7563	0.035522
						CYM1	0.91219	0.51224
						YDR431W	1.0614	0.69007
						NPL3	2.5498	0.20245
						YDR433W	1.9124	0.42746
						GPI17	1.1474	0.79852
						PPM1	1.1924	0.57048
						PPZ2	0.80452	0.53947
						GPI19	1.4284	0.30744
						THI74	0.95068	0.8308
						LRS4	1.3197	0.64103
						DOT1	0.73704	0.49073
						APT2	0.95668	0.75066
						YDR442W	0.94877	0.92798
						SSN2	0.71667	0.69961
						YDR444W	0.84996	0.49752
						YDR445C	1.0342	0.83678
						ECM11	1.0439	0.90646
						RPS17B	0.98355	0.96467
						ADA2	0.79142	0.69358
						UTP6	0.57743	0.70078
						RPS18A	0.70512	0.4229
						YHP1	0.86169	0.41352
						PPN1	0.96407	0.88266
						TSA2	1.204	0.17444
						GUK1	0	0.44926
						YDR455C	0.6974	0.21597
						NHX1	0.92811	0.83596
						TOM1	0.95563	0.90751
						HEH2	1.2655	0.27015
						PFA5	0.85483	0.62638
						TFB3	0.86683	0.84593
						MFA1	0.34239	0.32593
						YDR461C-A	0.59911	0.45564
						MRPL28	1.7359	0.28639
						STP1	0.89462	0.82914
						SPP41	0.83394	0.71567
						YDR464C-A	1.0514	0.93691
						RMT2	1.3816	0.051786
						PKH3	0.8824	0.47339
						YDR467C	1.2305	0.49379
						TLG1	1.2886	0.66901
						SDC1	1.5814	0.22007
						UGO1	3.4554	0.014314
						RPL27B	0.59656	0.23234
						TRS31	1.8244	0.26661
						PRP3	0.71567	0.5376
						JIP4	0.9251	0.71965
						YDR476C	1.1474	0.51022
						SNF1	0.92194	0.9091
						SNM1	3.3432	0.22345
						PEX29	0.67611	0.28426
						DIG2	0.88851	0.64748
						PHO8	0.75589	0.4279
						CWC21	0.9197	0.54358
						KRE2	0.82346	0.61221
						VPS52	0.96908	0.9583
						VPS72	0.83121	0.43284
						VPS60	0.83	0.55638
						RIB3	NaN	NaN
						PAC11	1.0914	0.65966
						SLD5	0	0.57643
						PKH1	0.79771	0.31828
						YDR491C	0.92723	0.43922
						IZH1	0.93936	0.7784
						MZM1	1.3539	0.53631
						RSM28	1.0291	0.95694
						VPS3	0.85703	0.7609
						PUF6	0.9806	0.89814
						ITR1	1.0349	0.91307
						SEC20	0.90387	0.71024
						LCD1	0.80454	0.78234
						RPL37B	1.1567	0.76553
						PLM2	0.64672	0.23744
						SAM2	0.55741	0.021335
						LPP1	0.89388	0.70802
						SPG3	0.48023	0.29333
						PSP1	0.94946	0.82627
						GMC1	0.91659	0.72821
						GIN4	0.68402	0.012077
						GNP1	1.2525	0.25885
						YDR509W	0.97231	0.94152
						SMT3	0	0.58385
						YDR510C-A	1.9339	0.29927
						SDH7	1.0962	0.74672
						EMI1	0.91521	0.54095
						GRX2	0.96962	0.92338
						YDR514C	0.75567	0.090086
						SLF1	1.3128	0.6265
						EMI2	0.65336	0.19694
						GRH1	0.93346	0.72904
						EUG1	0.68147	0.27627
						FPR2	0.17839	0.0398
						URC2	0.9366	0.69743
						YDR521W	0.72932	0.51002
						SPS2	0.5952	0.12274
						SPS1	0.73079	0.21388
						AGE1	1.0756	0.77381
						YDR524W-C	1.2748	0.64186
						YDR524C-B	0.89235	0.91964
						YDR524C-A	1.0201	0.93576
						API2	0.94041	0.74208
						SNA2	1.042	0.871
						YDR526C	0	0.44558
						RBA50	0.7922	0.73114
						HLR1	1.0022	0.98433
						QCR7	0.61496	0.1856
						APA2	0.76606	0.19646
						CAB1	0	0.27025
						KRE28	1.1783	0.76607
						HSP31	0.70491	0.19614
						FIT1	1.0285	0.90807
						YDR535C	0.95102	0.84104
						STL1	0.91031	0.49261
						YDR537C	1.546	0.30046
						PAD1	1.5405	0.22129
						FDC1	0.65568	0.38442
						IRC4	0.63825	0.27842
						YDR541C	0.65644	0.05145
						PAU10	0	0.49068
						YDR543C	1.6358	0.18239
						YDR544C	0.75831	0.72105
						YRF1-1	NaN	NaN
						YDR545C-A	NaN	NaN
						YEL077C	0.88252	0.74626
						YEL077W-A	0.25565	0.28807
						YEL076C-A	NaN	NaN
						YEL076C	NaN	NaN
						YEL075W-A	2.4859	0.42545
						YEL075C	2.4859	0.42545
						YEL074W	1.1876	0.070742
						YEL073C	0.49163	0.036957
						RMD6	0.84189	0.49959
						DLD3	0.86975	0.50273
						DSF1	0.9782	0.92219
						HXT13	0.73386	0.2291
						YEL068C	1.2557	0.42208
						YEL067C	1.0328	0.80374
						HPA3	0.99196	0.98082
						SIT1	0.71405	0.12155
						AVT2	1.0642	0.75431
						CAN1	0.77775	0.44554
						NPR2	1.3872	0.39429
						CIN8	1.2492	0.33976
						PRB1	0.94943	0.83771
						SOM1	0.86175	0.65796
						HHY1	0.90759	0.57633
						PCM1	1.4768	0.56235
						YEL057C	1.2259	0.21805
						HAT2	0.97551	0.88316
						POL5	2.3282	0.12775
						RPL12A	1.564	0.1918
						YEL053W-A	1.2908	0.52981
						MAK10	1.2448	0.048911
						AFG1	0.82047	0.54084
						VMA8	0.75301	0.83171
						YEL050W-A	1.6842	0.22544
						RML2	1.584	0.38794
						PAU2	1.1873	0.48463
						TCA17	0.60564	0.50004
						FRD1	1.0159	0.92801
						GLY1	0.46103	0.57923
						YEL045C	1.0306	0.88833
						IES6	0.75587	0.68481
						YEL043W	0.93046	0.41407
						GDA1	1.0352	0.87035
						YEF1	0.7325	0.20242
						UTR2	1.071	0.59839
						CYC7	1.0481	0.8908
						UTR4	1.0911	0.54756
						RAD23	0.79812	0.42244
						ANP1	1.2738	0.22498
						UTR5	1.01	0.92965
						YEL034C-A	0.8986	0.75735
						HYP2	0.66407	0.40804
						MTC7	0.87289	0.47964
						MCM3	2.954	0.022123
						YEL032C-A	7.4567	0.058625
						SPF1	1.1905	0.66752
						YEL030C-A	0.81273	0.65253
						ECM10	1.1643	0.24434
						BUD16	0.96311	0.87501
						YEL028W	0.96602	0.9196
						VMA3	0	0.30105
						SNU13	1.0475	0.97012
						YEL025C	1.0828	0.45864
						RIP1	1.4142	0.52052
						YEL023C	0.89628	0.28941
						GEA2	0.89179	0.25624
						URA3	0.95586	0.84774
						YEL020C-B	NaN	NaN
						TIM9	0.67802	0.47821
						YEL020C	0.99947	0.99539
						MMS21	1.1653	0.54736
						YEL018C-A	0.95352	0.89119
						EAF5	0.89592	0.81508
						PMP2	1.4199	0.27263
						GTT3	1.2019	0.3803
						NPP2	1.1118	0.34754
						EDC3	0.96752	0.82735
						YEL014C	0.94603	0.51168
						VAC8	1.1248	0.23328
						UBC8	0.99559	0.97383
						GLC3	1.0908	0.43476
						YEL010W	1.0595	0.79285
						YEL009C-A	1.0147	0.93384
						GCN4	1.1925	0.29843
						YEL008W	0.77417	0.2726
						YEL008C-A	0.74942	0.40044
						MIT1	1.0232	0.91064
						YEA6	1.1708	0.29928
						VAB2	0.99481	0.97374
						YEA4	0.90818	0.25376
						GIM4	1.1173	0.32184
						WBP1	0.87306	0.61229
						IRC22	1.1411	0.22745
						MNN1	1.0668	0.57871
						NOP16	1.2888	0.49693
						PMI40	1.9613	0.12565
						FMP52	1.0092	0.94817
						YND1	0.94562	0.75923
						NUG1	0.91396	0.70604
						YER006C-A	0.90883	0.57855
						PAC2	1.1091	0.63713
						TMA20	1.2588	0.14983
						SEC3	1.0963	0.35852
						NTF2	0	0.72097
						YER010C	1.0509	0.76775
						TIR1	1.0174	0.91652
						PRE1	0.97521	0.93533
						PRP22	1.0645	0.70977
						HEM14	1.914	0.38801
						BUD25	1.054	0.65096
						FAA2	1.0206	0.71603
						BIM1	0.94083	0.56529
						AFG3	1.1324	0.82387
						SPC25	0.8428	0.57221
						ISC1	1.138	0.59729
						SBH2	0.98615	0.96995
						GPA2	1.0285	0.77391
						RPN3	1.6145	0.059707
						SRB4	0.76691	0.6892
						PRO3	0.39935	0.26854
						YER023C-A	NaN	NaN
						YAT2	0.96892	0.7354
						GCD11	0.43409	0.34096
						CHO1	0	0.1231
						GAL83	1.2723	0.19447
						MIG3	1.0227	0.85146
						SMB1	0.99512	0.97423
						CHZ1	1.7103	0.19593
						YPT31	0.89195	0.5158
						FIR1	1.0549	0.62627
						ZRG8	0.94198	0.6485
						YER034W	0.86032	0.30417
						EDC2	0.90301	0.54752
						ARB1	1.4081	0.61404
						PHM8	1.1015	0.4751
						KRE29	1.1867	0.79169
						YER038W-A	1.4255	0.35538
						HVG1	1.212	0.40924
						YER039C-A	0.66812	0.21543
						GLN3	0.85239	0.25782
						YEN1	1.0909	0.394
						MXR1	0.84234	0.61603
						SAH1	0	0.46583
						ERG28	0.72778	0.73244
						MEI4	1.17	0.40179
						ACA1	0.71111	0.0076298
						SPO73	0.91176	0.7571
						YER046W-A	0.85911	0.69213
						SAP1	0.9138	0.68722
						CAJ1	1.0113	0.93858
						ISD11	0.93643	0.93541
						TPA1	0.67682	0.2929
						RSM18	3.4019	0.050971
						JHD1	0.77818	0.12294
						HOM3	0.69971	0.16903
						PIC2	0.86453	0.58292
						YER053C-A	0	0.35021
						GIP2	0.85786	0.25123
						HIS1	1.0771	0.69112
						FCY2	1.0019	0.99204
						RPL34A	0.92826	0.85767
						HMF1	0.77671	0.11704
						PET117	0.97236	0.95207
						PCL6	1.1191	0.68031
						FCY21	0.84492	0.27411
						FCY22	0.98361	0.92776
						CEM1	0.89847	0.3549
						GPP2	1.1014	0.11422
						THO1	1.141	0.56778
						VHR2	1.1175	0.6347
						ICL1	0.82227	0.1396
						RRT13	0.66932	0.5237
						YER066C-A	1.8767	0.057936
						RGI1	0.53097	0.097964
						YER067C-A	0.73729	0.4129
						MOT2	1.0914	0.75678
						YER068C-A	1.0613	0.79069
						ARG5%2C6	0.595	0.42684
						RNR1	0.66509	0.36444
						TDA2	1.2626	0.61803
						VTC1	0.76736	0.43351
						ALD5	0.78369	0.28701
						RPS24A	0.61908	0.68487
						YOS1	0	0.72097
						PTP3	1.0684	0.71903
						YER076C	1.0121	0.93003
						YER076W-A	1.5826	0.068903
						YER077C	1.2028	0.47145
						ICP55	1.0291	0.78666
						YER078W-A	1.3576	0.11506
						YER079W	0.78856	0.45352
						YER079C-A	1.3591	0.18407
						AIM9	1.178	0.46976
						SER3	0.86268	0.31757
						UTP7	1.0879	0.88848
						GET2	0.63576	0.47018
						YER084W	1.3027	0.10447
						YER084W-A	1.3937	0.4623
						YER085C	1.3937	0.4623
						ILV1	0.86516	0.85601
						AIM10	1.7615	0.39397
						YER087C-A	2.0298	0.13149
						SBH1	1.5721	0.063376
						DOT6	0.83064	0.30693
						YER088C-A	1.0905	0.33847
						YER088W-B	1.0929	0.48626
						PTC2	0.95842	0.76616
						TRP2	0.8183	0.28667
						YER090C-A	0.94284	0.93598
						MET6	0.88028	0.87299
						YER091C-A	1.0572	0.6977
						IES5	0.78687	0.34739
						TSC11	1.0022	0.99277
						AIM11	0.82627	0.45463
						PUP3	0	0.72097
						RAD51	0.51355	0.15885
						SHC1	0.96493	0.88784
						YER097W	1.0313	0.83066
						UBP9	1.0495	0.79656
						PRS2	0.86921	0.52297
						UBC6	1.1482	0.59642
						AST2	1.0091	0.97227
						RPS8B	0.77373	0.40213
						SSA4	1.0667	0.81117
						RTT105	0.84139	0.79129
						NUP157	0.88958	0.60895
						MAM1	1.0724	0.44195
						GLE2	0	0.32634
						YER107W-A	0.42056	0.26429
						FLO8	1.0625	0.81338
						KAP123	0.94278	0.85329
						SWI4	0.93063	0.77993
						LSM4	1.4134	0.75917
						TMN3	1.0069	0.97054
						BOI2	0.92978	0.7652
						SPR6	0.5132	0.097394
						SLX8	1.1356	0.10752
						RPL23B	2.3965	0.2322
						SHO1	0.63801	0.18019
						AVT6	0.68722	0.14679
						YER119C-A	0.95145	0.862
						SCS2	1.2604	0.54533
						YER121W	0.97145	0.91393
						GLO3	1.1315	0.49174
						YCK3	1.5733	0.1154
						DSE1	0.86915	0.35086
						RSP5	0	0.51338
						NSA2	1.7853	0.55498
						LCP5	1.1508	0.86561
						VFA1	1.3237	0.43128
						SAK1	1.0062	0.97127
						COM2	1.1006	0.38812
						RPS26B	0.66788	0.30739
						PMD1	0.89515	0.35414
						GLC7	0.87787	0.90066
						YER133W-A	1.1809	0.78733
						YER134C	0.98379	0.95821
						YER135C	1.7191	0.075177
						GDI1	0	0.35605
						YER137C	0.97969	0.93998
						YER137W-A	1.1707	0.64775
						YER138W-A	2.7291	0.12881
						RTR1	1.4402	0.1816
						EMP65	1.0088	0.97415
						COX15	1.6179	0.2374
						MAG1	0.78654	0.54261
						DDI1	1.0016	0.99265
						UBP5	1.0456	0.68313
						FTR1	0.99	0.98309
						YER145C-A	1.1908	0.49456
						LSM5	1.2946	0.47791
						SCC4	1.2701	0.43107
						YER147C-A	0.43671	0.39022
						SPT15	0	0.15242
						YER148W-A	0.76411	0.65479
						PEA2	0.95371	0.8922
						SPI1	0.7466	0.52374
						UBP3	0.87325	0.74518
						YER152C	0.72982	0.21008
						YER152W-A	0.51214	0.15253
						PET122	1.182	0.59049
						OXA1	1.1335	0.86089
						BEM2	1.1568	0.72272
						YER156C	0.51242	0.055737
						COG3	0.56956	0.27188
						YER158C	0.90071	0.31437
						YER158W-A	1.6806	0.012073
						BUR6	2.0473	0.067014
						SPT2	1.3817	0.13849
						RAD4	1.1436	0.67398
						GCG1	0.66647	0.21549
						CHD1	0.80465	0.48703
						PAB1	0.23073	0.33679
						YER165C-A	0.34817	0.15951
						DNF1	0.78964	0.19356
						BCK2	1.3196	0.39905
						CCA1	0.59903	0.63921
						RPH1	0.86957	0.66464
						ADK2	0.83674	0.56014
						RAD3	0.66516	0.51753
						BRR2	1.369	0.41267
						YER172C-A	0.32812	0.36128
						RAD24	0.6354	0.27691
						GRX4	0.86368	0.47836
						TMT1	1.3409	0.058236
						YER175W-A	1.2049	0.71674
						ECM32	0.85898	0.15174
						BMH1	1.8616	0.0014207
						PDA1	0.93664	0.88174
						DMC1	0.85087	0.60216
						ISC10	1.0962	0.7204
						SLO1	0.95887	0.93805
						YER181C	0.93454	0.92834
						FMP10	0.86163	0.65708
						FAU1	0.68348	0.17667
						TOG1	0.95921	0.53225
						PUG1	0.82577	0.51865
						YER186C	0.74029	0.10509
						YER187W	1.0884	0.7451
						YER188W	0.86179	0.54038
						YER188C-A	0.59023	0.15302
						YER189W	0	0.48906
						YRF1-2	0.94583	0.81035
						YER190C-A	NaN	NaN
						YER190C-B	NaN	NaN
						YFL068W	NaN	NaN
						YFL067W	2.5631	0.16599
						YFL066C	2.0641	0.41139
						YFL065C	0	0.61903
						YFL064C	0.48149	0.46969
						YFL063W	1.0024	0.99175
						COS4	0.94662	0.90454
						DDI2	1.6692	0.44134
						SNO3	0.99838	0.99745
						SNZ3	0.66063	0.51482
						THI5	0.67482	0.5577
						AAD16	0.74884	0.029095
						AAD6	0.91683	0.71242
						AGP3	0.97678	0.85228
						YFL054C	0.87338	0.32024
						DAK2	0.76341	0.14902
						YFL052W	0.92136	0.72044
						YFL051C	0.95792	0.87107
						ALR2	0.71146	0.046715
						SWP82	1.1643	0.49233
						EMP47	1.0498	0.85134
						RGD2	0.8099	0.24356
						FMP32	0.95216	0.88296
						SEC53	0	0.59599
						OTU1	1.0826	0.6952
						YFL042C	0.92685	0.46849
						YFL041W-A	1.4687	0.32611
						FET5	0.81599	0.17811
						YFL040W	0.80309	0.10869
						ACT1	0	0.57967
						YPT1	0	0.43966
						TUB2	0.52673	0.55105
						RPO41	1.2095	0.76449
						MOB2	0.85238	0.58972
						RPL22B	0.91149	0.72963
						YFL034W	1.1261	0.31706
						RIM15	0.94322	0.86408
						YFL032W	1.0444	0.85369
						HAC1	1.0818	0.66737
						YFL031C-A	0.32902	0.3286
						AGX1	0.91101	0.50673
						CAK1	0	0.61823
						CAF16	0.93154	0.80816
						GYP8	1.1106	0.30889
						STE2	1.0666	0.1308
						BST1	1.0437	0.58986
						EPL1	1.3659	0.138
						BUD27	1.0511	0.71618
						FRS2	0	0.42772
						YFL021C-A	0.9572	0.68904
						GAT1	1.1448	0.25029
						PAU5	0.50114	0.18823
						YFL019C	1.5239	0.42945
						LPD1	1.053	0.71001
						SMX2	1.0455	0.96137
						GNA1	0.88748	0.8385
						MDJ1	1.3583	0.31428
						YFL015W-A	1.1051	0.7296
						YFL015C	1.0204	0.917
						HSP12	1.278	0.33416
						YFL013W-A	1.0712	0.71142
						IES1	1.0593	0.70423
						YFL012W-A	1.11	0.6707
						YFL012W	1.1124	0.26171
						HXT10	0.86091	0.3813
						AUA1	1.0374	0.81969
						WWM1	0.93786	0.6933
						CDC4	1.3525	0.27833
						SMC1	0	0.30152
						BLM10	1.2093	0.066993
						SEC4	0	0.57914
						VTC2	0.96947	0.84124
						MSH4	1.0494	0.70359
						SPB4	1.0235	0.94245
						DEG1	0.96136	0.75032
						LOC1	1.5829	0.15391
						NIC96	1.0959	0.36151
						YPI1	0.95878	0.93763
						RPN11	1.328	0.40832
						SAD1	1.4499	0.20134
						YFR006W	1.0412	0.80506
						YFH7	0.87391	0.5643
						FAR7	1.3588	0.558
[truncated: 4,576 more rows]

## Sheet: vps13SUP only vs VPS13
positively selected						gene	fold_change	student_ttest
gene	fold_change	student_ttest				YAL069W	0.96235	0.80164
MDM10	7.788	0.0011667				YAL068W-A	1.1741	0.77134
SRB8	3.9965	0.0024787				PAU8	1.1723	0.61194
YCR081C-A	5.067	0.00040044				YAL067W-A	0.95693	0.90192
SNU56	2.7064	0.02404				SEO1	1.1779	0.029274
SWR1	2.5127	0.0034896				YAL066W	1.6715	0.063421
SSN2	3.1531	0.0057254				YAL065C	1.0437	0.75155
TOM1	1.696	0.074164				YAL064W-B	1.5668	0.17257
BEM2	1.9573	0.019454				TDA8	0.91175	0.71567
MDM34	2.7734	0.012114				YAL064W	0.80715	0.66552
YLR302C	6.1296	0.0019065				YAL063C-A	0.30344	0.096298
MET17	Inf	0				FLO9	0.92374	0.71861
PGM2	8.172	0.0031993				GDH3	1.0335	0.83719
RPD3	2.5039	0.033319				BDH2	0.7595	0.010098
UBP10	1.7367	0.12461				BDH1	1.1205	0.25782
SSN8	2.979	0.035389				YAL059C-A	1.2177	0.26695
POP2	2.135	0.0065937				ECM1	1.0665	0.75915
RTC1	1.5544	0.11092				CNE1	1.0484	0.81257
MDM12	4.7965	0.0018712				YAL056C-A	0.96553	0.87089
CAF20	2.8936	0.0059532				GPB2	1.4866	0.00011126
CUP9	2.0932	0.0037417				PEX22	1.2512	0.40438
ERI1	4.4858	0.0066253				ACS1	0.92254	0.66036
SSN3	1.8797	0.012377				FLC2	1.1583	0.32009
VPS69	2.437	2.282e-05				OAF1	0.95886	0.66923
SRP54	2.348	0.00016159				AIM2	0.82242	0.35396
YPR147C	1.9603	0.012858				GEM1	1.0602	0.3455
negatively selected						YAL047W-A	0.94549	0.85248
gene	fold_change	student_ttest				SPC72	0.88034	0.68763
CYC3	0.20438	0.00013694				AIM1	1.0332	0.9056
PET112	0	0.072581				YAL045C	1.0603	0.81754
COR1	0.11611	0.0061796				YAL044W-A	0.95029	0.89688
MRPL16	0.29602	0.10073				GCV3	0.89732	0.51527
PIM1	0.078187	0.0024292				PTA1	1.4389	0.23488
COQ1	0.077856	0.0031205				YAL042C-A	0.86045	0.46063
CSG2	0.090269	0.22225				ERV46	1.0395	0.78024
SCO1	0.11009	0.031358				CDC24	0.86217	0.67762
EXO5	0.070692	0.067495				CLN3	0.7492	0.26149
FZO1	0	0.035832				CYC3	0.20438	0.00013694
PGS1	0.25366	0.16328				CDC19	0.46754	0.42812
MRPL32	0.44849	0.03781				YAL037C-B	0.46433	0.42695
SLM5	0.11807	0.066881				YAL037C-A	1.1214	0.59454
IMG1	0.26675	0.082373				YAL037W	0.87472	0.31804
HMRA1	0.046467	0.066155				RBG1	0.88718	0.47059
MSS2	0.21929	0.011257				FUN12	1.1609	0.79844
MTF2	0.18179	0.014266				YAL034C-B	1.0285	0.9017
ATP16	0	0.17269				MTW1	0.89674	0.36746
RRG1	0.1194	0.094781				FUN19	1.0506	0.56366
CBS2	0	0.0054482				POP5	0.67212	0.46697
IRC3	0.2047	0.10764				PRP45	0.84772	0.46969
BCS1	0.13603	0.024576				YAL031W-A	0.95001	0.73813
RML2	0.12395	0.048276				GIP4	1.1312	0.17916
SPF1	0.52117	0.2601				SNC1	0.92953	0.84297
RIP1	0.080026	0.030733				MYO4	0.93566	0.55946
AFG3	0.052172	0.0060848				FRT2	0.85396	0.10117
AIM10	0.038169	0.14048				SAW1	0.88588	0.53454
MET6	0.094812	0.014096				YAL026C-A	0.90485	0.81394
COX15	0.20501	0.022146				DRS2	0.80341	0.63937
PET122	0.42358	0.020064				MAK16	1.4799	0.63282
OXA1	0.14927	0.056123				LTE1	0.52667	0.073564
RPO41	0.10274	0.073992				PMT2	0.73212	0.098872
MDJ1	0.46268	0.074917				FUN26	0.82107	0.045521
MRF1	0.045177	0.083159				CCR4	1.0564	0.8566
COQ8	0.070662	0.0048371				ATS1	0.7751	0.1391
MNP1	0	0.064271				YAL019W-A	0.94446	0.68367
MRH4	0.13493	0.089724				FUN30	0.90758	0.41985
COX18	0.035666	0.0039433				LDS1	0.87203	0.53255
PCP1	0.25968	0.13304				PSK1	0.97064	0.56021
CCM1	0.19356	0.10163				YAL016C-B	0.56771	0.04286
COQ6	0.24057	0.057908				YAL016C-A	0.88118	0.61732
CBP2	0.17185	0.008822				TPD3	1.6069	0.34984
MRP4	0.15754	0.040043				NTG1	0.96647	0.85318
DIA4	0.021819	0.10297				SYN8	1.2844	0.084893
ARG4	0.15107	0.10662				DEP1	1.0764	0.58373
SRB2	0.10848	0.13878				CYS3	1.4857	0.68083
MSR1	0.027642	0.051962				SWC3	1.3786	0.026979
MSH1	0.18064	0.16403				MDM10	7.788	0.0011667
PTH1	0.25005	0.0019791				SPO7	0.82964	0.28029
COA1	0.12669	0.0015786				FUN14	0.92723	0.69589
MRS1	0.067044	0.00035741				ERP2	0.94683	0.22878
LYS1	0.15303	0.2639				SSA1	0.77202	0.065181
CBP1	0	0.013916				YAL004W	0.95214	0.87503
INO1	0.1477	0.24299				EFB1	0	0.3547
MEF2	0.11994	0.062014				VPS8	1.0482	0.87297
MRPL8	0.0449	0.032165				TFC3	1.3705	0.041245
PEP8	0.26567	0.13387				NUP60	1.2028	0.37908
PET130	0.21037	0.17047				ERP1	1.0103	0.95288
YJL022W	0.056131	0.079118				SWD1	1.0244	0.93285
COX16	0.13636	0.043268				RFA1	1.0639	0.85515
ADO1	0.339	0.25623				SEN34	0.75104	0.57608
RSM7	0.13778	0.12281				BUD14	1.0076	0.89897
MGM101	0.091035	0.080538				ADE1	0.65496	0.73277
MST1	0.08032	0.096352				KIN3	0.81145	0.33241
RSM22	0.25126	0.0095088				CDC15	0.90972	0.85649
OCT1	0.12683	0.14946				YAR019W-A	0.89524	0.36232
ATP7	0.22959	0.084875				PAU7	1.0841	0.80889
MRP17	0.21196	0.06273				YAR023C	1.0127	0.91508
VPS1	0.14535	0.19629				UIP3	1.1763	0.52392
MRPL13	0.1656	0.013226				YAR028W	0.72209	0.42325
DYN1	0.46913	0.06665				YAR029W	0.79213	0.73187
PET309	0.028286	0.038946				YAR030C	1.3546	0.1351
MEF1	0	0.10255				PRM9	0.60776	0.075766
GEP5	0.38103	0.21049				MST28	0.70147	0.10438
SLS1	0	0.010237				YAT1	0.95573	0.61993
MDM30	0.31376	0.033104				YAR035C-A	0.84621	0.52485
NAM2	0.05536	0.048673				SWH1	1.0917	0.5624
SST2	0.30532	0.01218				YAR047C	0.60439	0.58013
COQ5	0.045023	0.064005				FLO1	1.099	0.12983
YML6	0.27924	0.019688				YAR053W	1.1778	0.68783
YPT7	0.31892	0.053213				YAR060C	NaN	NaN
MAC1	0.18273	0.22363				YAR064W	0.88719	0.64466
IMP2	0.24333	0.015549				YAR066W	1.5335	0.64414
SOV1	0.092459	0.028517				YAR068W	0.37102	0.43375
YTA12	0.16661	0.066959				YAR069C	NaN	NaN
PET111	0.0993	0.020833				YAR070C	1.0124	0.98725
AEP2	0.14715	0.044279				PHO11	0.47979	0.44662
DSS1	0.037547	0.051851				IMD1	0.64796	0.43842
HER2	0	0.024719				YAR075W	1.2055	0.61461
MSK1	0.067354	0.067964				YBL113C	1.1057	0.6792
PET8	0.076641	0.021736				YBL113W-A	0	0.45636
COQ2	0.18177	0.0183				YBL112C	NaN	NaN
PET494	0.31753	0.027349				YBL111C	1.3021	0.80395
COQ3	0.05562	0.0054559				YBL109W	1.4336	0.04212
HMI1	0.060182	0.014442				PAU9	0	0.704
ARG1	0.15946	0.27965				YBL108W	0.7049	0.35107
MSE1	0.027027	0.081019				YBL107W-A	5.1652	0.015376
CAT5	0.064506	0.032505				MIX23	0.74371	0.18806
GEP3	0.05903	0.012412				SRO77	1.0946	0.62983
MIP1	0.31542	0.061873				PKC1	2.1287	0.11244
MRS2	0.047241	0.010306				SEA4	1.368	0.16271
MRPL40	0.19185	0.13295				RTG3	1.1584	0.70041
COX10	0.063574	0.00059065				SFT2	0.92495	0.87789
COX11	0.29579	0.051575				ECM21	1.0475	0.73829
MSD1	0.091113	0.17238				YBL100W-C	1.8916	0.056482
MSY1	0	0.14538				YBL100C	0	0.34989
MFM1	0.053286	0.0022608				ATP1	0	0.32917
ISM1	0.056488	0.060114				BNA4	1.0418	0.85986
SUV3	0.10677	0.013754				BRN1	1.3035	0.13
MRPS16	0.14207	0.086175				YBL096C	0.85119	0.66196
AEP3	0.089299	0.004802				YBL095W	1.0515	0.80318
MSF1	0	0.087307				YBL094C	0.99518	0.99075
						ROX3	1.0493	0.90453
						RPL32	NaN	NaN
						SCS22	1.4448	0.30371
						MAP2	1.1334	0.68189
						MRP21	0.1341	0.046603
						AVT5	0.86066	0.37758
						TEL1	0.89626	0.58527
						RPL23A	1.0364	0.80692
						YBL086C	0.72012	0.26394
						BOI1	1.1909	0.073823
						CDC27	0.88542	0.67017
						YBL083C	0.77215	0.59729
						ALG3	0.78201	0.25954
						YBL081W	0.85832	0.59041
						PET112	0	0.072581
						NUP170	1.6101	0.070809
						ATG8	1.337	0.70116
						YBL077W	1.0986	0.70635
						ILS1	0	0.401
						SSA3	1.1001	0.4272
						AAR2	1.5423	0.00072314
						YBL073W	0.9609	0.72956
						RPS8A	0.72107	0.61292
						YBL071C-B	1.0368	0.93913
						KTI11	0.44587	0.42707
						YBL071C	1.0674	0.8426
						YBL070C	1.1785	0.75031
						AST1	0.8738	0.66031
						YBL068W-A	0.49824	0.5835
						PRS4	1.0375	0.89703
						UBP13	0.99674	0.97981
						SEF1	1.0625	0.7835
						YBL065W	1.0335	0.94362
						PRX1	0.49425	0.044745
						KIP1	1.1511	0.20745
						YBL062W	0.73712	0.56452
						SKT5	0.96159	0.8883
						YEL1	1.137	0.41523
						CMC2	0.11861	0.19277
						YBL059W	0.96116	0.90663
						SHP1	1.0434	0.91123
						PTH2	1.1429	0.56453
						PTC3	0.84952	0.64549
						YBL055C	1.0298	0.88102
						TOD6	1.3591	0.11631
						YBL053W	1.0787	0.82988
						SAS3	0.949	0.66821
						PIN4	1.0811	0.8481
						SEC17	0	0.55799
						MOH1	0.87537	0.74338
						RRT1	1.3505	0.3858
						EDE1	1.2117	0.37001
						PSY4	0.94366	0.75098
						COR1	0.11611	0.0061796
						YBL044W	1.0965	0.14332
						ECM13	1.1951	0.49497
						FUI1	1.1913	0.36352
						PRE7	6.1521	0.10326
						ERD2	0.95585	0.88655
						YBL039W-B	0.51627	0.42661
						URA7	1.076	0.2928
						YBL039C-A	2.497	0.15262
						MRPL16	0.29602	0.10073
						APL3	0.97678	0.85985
						YBL036C	1.1145	0.4968
						POL12	1.3818	0.23018
						STU1	1.0173	0.9489
						RIB1	1.5283	0.15821
						HEK2	0.92482	0.84664
						SHE1	0.91938	0.81905
						PET9	0	0.07308
						YBL029C-A	0.863	0.63858
						YBL029W	0.93288	0.73325
						YBL028C	0.93182	0.82637
						RPL19B	1.1275	0.80283
						LSM2	0	0.30868
						RRN10	1.9147	0.072512
						NCL1	1.1908	0.021623
						MCM2	0.64594	0.13374
						PIM1	0.078187	0.0024292
						HAP3	1.0243	0.82321
						RFT1	0.92871	0.86498
						APN2	1.1609	0.078973
						POP8	0.82056	0.4941
						PEP1	1.1411	0.23386
						FUS3	0.81794	0.25165
						ACH1	0.83315	0.44518
						RRN6	0.91019	0.3032
						FMT1	0.65526	0.080796
						YBL012C	0.81212	0.44475
						SCT1	0.86979	0.29483
						YBL010C	1.0596	0.7095
						ALK2	1.0689	0.48454
						YBL008W-A	0.78509	0.34259
						HIR1	1.0353	0.73922
						SLA1	0.90177	0.81327
						LDB7	0.81538	0.52284
						YBL006W-A	0.84895	0.61428
						PDR3	1.1134	0.46697
						UTP20	0.72757	0.44112
						HTA2	1.105	0.708
						HTB2	1.0758	0.70511
						ECM15	0.72404	0.35118
						NTH2	0.97209	0.90104
						RER2	1.0116	0.97748
						COQ1	0.077856	0.0031205
						GPI18	0.32277	0.30173
						RCR1	0.82566	0.31215
						UGA2	0.91838	0.4642
						DSF2	0.99167	0.95737
						FLR1	0.86677	0.18237
						HHF1	0.27475	0.014457
						HHT1	1.0234	0.91639
						IPP1	0.78808	0.59102
						YBR012C	0.94533	0.79231
						YBR013C	0.90753	0.58687
						GRX7	0.9425	0.84034
						MNN2	0.98364	0.89112
						YBR016W	0.95129	0.81391
						KAP104	1.1473	0.62018
						GAL7	0	0.24979
						GAL10	1.1709	0.68624
						GAL1	1.4117	0.45387
						FUR4	1.1702	0.51766
						POA1	1.034	0.84854
						CHS3	0.96793	0.89547
						SCO2	1.0894	0.67704
						OLA1	1.015	0.9619
						ETR1	0.84753	0.28876
						YBR027C	1.1142	0.64614
						YPK3	0.97951	0.90723
						CDS1	1.4773	0.53056
						RKM3	0.75416	0.2466
						RPL4A	0.44434	0.26019
						YBR032W	0.80274	0.45086
						EDS1	1.0235	0.91192
						HMT1	0.59939	0.12119
						PDX3	1.2748	0.46819
						CSG2	0.090269	0.22225
						SCO1	0.11009	0.031358
						CHS2	0.52283	0.3471
						ATP3	0	0.26754
						FIG1	1.059	0.88004
						FAT1	0.80365	0.15649
						CST26	0.95709	0.74208
						QDR3	1.1354	0.4844
						TCM62	1.2085	0.096522
						GIP1	1.0449	0.75194
						ZTA1	0.97544	0.86808
						FMP23	0.98413	0.89854
						RPS11B	1.1681	0.66703
						REB1	2.2453	0.068904
						REG2	0.93085	0.65658
						YBR051W	0.60498	0.060608
						RFS1	1.1999	0.43703
						YBR053C	0.89737	0.46389
						YRO2	1.362	0.067683
						PRP6	1.1209	0.67751
						YBR056W	0.99272	0.97601
						YBR056W-A	0.86269	0.77046
						YBR056C-B	1.0003	0.99943
						MUM2	0.73269	0.13869
						UBP14	1.0693	0.78024
						TSC3	0.38027	0.40995
						AKL1	1.031	0.83989
						ORC2	0.7446	0.47325
						TRM7	0.69261	0.259
						YBR062C	1.322	0.15927
						YBR063C	0.74084	0.0082947
						YBR064W	0.99124	0.97644
						ECM2	1.0197	0.80629
						NRG2	0.8137	0.64504
						TIP1	0.95916	0.91682
						BAP2	0.64804	0.59413
						TAT1	1.1358	0.82253
						ALG14	0	0.704
						YBR071W	1.1527	0.39841
						HSP26	0.90152	0.8073
						YBR072C-A	1.1086	0.60887
						RDH54	1.2976	0.18374
						PFF1	1.0993	0.46671
						ECM8	0.92507	0.85258
						YBR076C-A	1.33	0.12837
						SLM4	0.91193	0.76485
						ECM33	0.97609	0.91513
						RPG1	0.91096	0.81192
						SEC18	0.57958	0.62464
						SPT7	0.87941	0.75879
						UBC4	1.4766	0.24
						TEC1	1.1632	0.48297
						MIS1	0.96282	0.72522
						RPL19A	1.2608	0.33197
						AAC3	1.1651	0.65169
						YBR085C-A	1.1882	0.39569
						IST2	0.7566	0.2687
						RFC5	8.6553	0.035347
						POL30	0	0.55515
						YBR089W	0	0.704
						NHP6B	0.82585	0.39526
						YBR090C	0.77318	0.45118
						TIM12	NaN	NaN
						PHO3	0.90037	0.24833
						PHO5	1.5333	0.034902
						PBY1	1.158	0.29187
						RXT2	1.6605	0.016351
						YBR096W	1.0957	0.53568
						VPS15	1.0396	0.88642
						MMS4	0.80187	0.23154
						YBR099C	0.64391	0.23185
						FES1	0.49	0.082786
						EXO84	0.92939	0.84117
						SIF2	1.3557	0.31779
						YBR103C-A	0.91597	0.67033
						YMC2	1.1054	0.48646
						VID24	0.94064	0.82537
						PHO88	0.95196	0.88342
						IML3	0.82805	0.7457
						AIM3	1.0262	0.85316
						CMD1	5.342	0.15098
						YBR109W-A	1.4337	0.43021
						ALG1	0.76599	0.84116
						YSA1	0.70665	0.36761
						SUS1	1.2584	0.72204
						CYC8	1.3645	0.31322
						YBR113W	1.3535	0.54473
						RAD16	1.0445	0.65462
						LYS2	0.26429	0.28364
						YBR116C	0.97851	0.92513
						TKL2	1.0822	0.62095
						TEF2	0	0.2558
						MUD1	1.3924	0.36602
						CBP6	0.82695	0.74866
						GRS1	Inf	0
						YBR121C-A	NaN	NaN
						MRPL36	0.96395	0.92323
						TFC1	1.3883	0.58386
						YBR124W	0.77782	0.095726
						PTC4	1.0951	0.60074
						TPS1	1.0428	0.95424
						YBR126W-A	1.4051	0.15866
						YBR126W-B	1.5823	0.014136
						VMA2	1.391	0.22118
						ATG14	1.1208	0.7692
						OPY1	1.2086	0.48724
						SHE3	0.97589	0.95335
						CCZ1	0.43501	0.38089
						YBR131C-A	0	0.704
						AGP2	1.1696	0.54173
						HSL7	1.4651	0.024064
						YBR134W	0.95063	0.83565
						CKS1	1.7371	0.37045
						MEC1	1.6136	0.34142
						YBR137W	1.2442	0.077153
						YBR138C	1.1666	0.40215
						YBR139W	0.61854	0.25969
						IRA1	1.2558	0.38947
						BMT2	1.2459	0.32352
						YBR141W-A	1.284	0.5651
						MAK5	0.33581	0.26028
						SUP45	0	0.704
						YBR144C	1.0894	0.81211
						ADH5	1.0859	0.56234
						MRPS9	0	0.16582
						RTC2	1.1244	0.66339
						YSW1	1.3367	0.10803
						ARA1	0.86497	0.59257
						TBS1	1.3422	0.36911
						APD1	1.2845	0.14583
						SPP381	1.2043	0.58674
						RIB7	2.1347	0.381
						RPB5	0	0.54291
						CNS1	0	0.12386
						SLI15	0.65265	0.59869
						ICS2	1.115	0.62781
						AMN1	1.083	0.72261
						IFA38	1.1746	0.89335
						CDC28	2.7431	0.3139
						CSH1	1.1003	0.81605
						TOS1	1.038	0.90466
						YSY6	0.76284	0.70853
						EXO5	0.070692	0.067495
						ARL1	0.65111	0.4778
						UBS1	1.4984	0.31924
						TYR1	0.99301	0.99328
						POP7	0	0.704
						PEX32	1.3539	0.27094
						SSE2	1.11	0.59788
						NPL4	1.0089	0.95967
						SEC66	0.68039	0.49956
						SMY2	1.3225	0.254
						UMP1	0.49049	0.55361
						YBR174C	1.044	0.88226
						SWD3	1.9951	0.063725
						ECM31	0.99739	0.99045
						EHT1	1.4708	0.0084125
						YBR178W	1.2379	0.30464
						FZO1	0	0.035832
						DTR1	1.2489	0.34699
						RPS6B	1.6688	0.14305
						SMP1	1.1308	0.62416
						YBR182C-A	1.7481	0.10996
						YPC1	1.0707	0.90315
						YBR184W	1.2545	0.15581
						MBA1	0.68353	0.39168
						PCH2	1.1127	0.60239
						GDT1	1.6216	0.094339
						NTC20	1.1298	0.61338
						RPS9B	0.53632	0.34612
						YBR190W	0.65356	0.41929
						RPL21A	1.064	0.96278
						YBR191W-A	0	0.55836
						RIM2	0	0.22348
						MED8	1.4876	0.69384
						AIM4	1.6087	0.11502
						MSI1	1.5074	0.040409
						PGI1	0	0.704
						YBR196C-A	1.2555	0.14258
						YBR196C-B	0.77148	0.48384
						YBR197C	1.1585	0.61324
						TAF5	0.90885	0.96122
						KTR4	1.1531	0.58562
						BEM1	1.083	0.86435
						YBR200W-A	0.38346	0.54985
						DER1	0.51941	0.25908
						YBR201C-A	1.4431	0.32141
						MCM7	0.51481	0.31342
						COS111	1.2946	0.12253
						LDH1	1.2292	0.32692
						KTR3	1.0086	0.9741
						YBR206W	1.0837	0.76253
						FTH1	1.2831	0.15503
						DUR1%2C2	1.3731	0.046544
						YBR209W	1.0647	0.42568
						ERV15	1.748	0.011339
						AME1	0.56557	0.096023
						NGR1	1.0437	0.77209
						MET8	1.0864	0.76318
						SDS24	1.0624	0.78302
						HPC2	0.78905	0.59553
						YBP1	1.0609	0.82241
						ATG12	0.74587	0.23801
						PYC2	0.96088	0.44826
						YBR219C	0.94442	0.57994
						YBR220C	0.88631	0.21162
						PDB1	1.2906	0.33145
						YBR221W-A	0.92019	0.61454
						PCS60	0.81853	0.098708
						TDP1	1.1125	0.28142
						YBR223W-A	0.97441	0.94048
						YBR224W	0.81144	0.55631
						YBR225W	1.4164	0.22538
						YBR226C	1.077	0.87883
						MCX1	1.3803	0.14771
						SLX1	0.89583	0.70031
						ROT2	0.98321	0.95497
						OM14	0.6338	0.52073
						YBR230W-A	0.70992	0.43851
						SWC5	1.7685	0.045934
						YBR232C	0.771	0.39887
						PBP2	0.90761	0.63838
						DAD3	0	0.704
						ARC40	0	0.704
						VHC1	0.92612	0.7611
						ABD1	1.578	0.54102
						PRP5	3.9356	0.046641
						YBR238C	0.72566	0.19619
						ERT1	1.0555	0.5069
						THI2	1.3757	0.21077
						YBR241C	1.3466	0.31071
						YBR242W	1.0691	0.8563
						ALG7	0	0.45149
						GPX2	1.2018	0.60411
						ISW1	1.4759	0.031297
						RRT2	0.49939	0.11898
						ENP1	1.9442	0.46322
						HIS7	0.86771	0.61568
						ARO4	1.1494	0.2983
						SPO23	1.3334	0.022933
						MRPS5	0.19289	0.059969
						DUT1	0	0.45702
						SRB6	1.5395	0.42108
						TRS20	2.0426	0.53495
						MTC4	0.97853	0.94875
						YBR255C-A	0.79152	0.70614
						RIB5	0.93755	0.93642
						POP4	4.9503	0.1821
						SHG1	1.3162	0.35857
						YBR259W	1.0062	0.91811
						RGD1	1.1698	0.25419
						TAE1	0.8022	0.27877
						MIC12	1.4487	0.064315
						SHM1	1.0142	0.90824
						YPT10	1.3333	0.14545
						TSC10	0.86627	0.86445
						REI1	0.87451	0.71135
						SLM6	0.48712	0.49105
						MRPL37	0.33302	0.50701
						FMP21	0.9953	0.9899
						BIT2	1.1036	0.77018
						EFM2	1.1313	0.73459
						HSM3	1.1845	0.41715
						UBX7	1.4937	0.29463
						CHK1	0.92267	0.80799
						RIF1	0.77114	0.23414
						PPS1	1.1732	0.3546
						YBR277C	0.97952	0.94249
						DPB3	0.58098	0.24799
						PAF1	1.2726	0.17121
						SAF1	0.936	0.45444
						DUG2	1.172	0.3815
						MRPL27	0.44508	0.45278
						SSH1	1.2154	0.15462
						YBR284W	0.99144	0.94224
						YBR285W	2.0062	0.26372
						APE3	0.98133	0.93029
						YBR287W	1.3365	0.020724
						APM3	1.2931	0.38083
						SNF5	0.9109	0.72297
						BSD2	1.0898	0.77265
						CTP1	0.98565	0.89292
						YBR292C	0.85672	0.67283
						VBA2	0.83072	0.45623
						SUL1	1.0048	0.97176
						PCA1	1.2005	0.293
						PHO89	1.0486	0.83489
						YBR296C-A	0.91077	0.86295
						MAL33	0.98904	0.95996
						MAL31	1.5341	0.26599
						YBR298C-A	0.52126	0.11268
						MAL32	0.78949	0.57507
						YBR300C	1.1013	0.85941
						PAU24	0.94835	0.92957
						COS2	1.7807	0.7659
						YCL076W	0.88468	0.90061
						GEX1	0.40323	0.16396
						VBA3	0.42178	0.53395
						YCL068C	0	0.24341
						HMLALPHA2	NaN	NaN
						HMLALPHA1	NaN	NaN
						YCL065W	0	0.704
						CHA1	0.76647	0.68498
						VAC17	1.0552	0.81132
						MRC1	1.0698	0.83985
						KRR1	0.78237	0.75769
						FYV5	0.9475	0.88077
						ADF1	0.8526	0.85544
						MIC10	0.25835	0.13206
						PRD1	1.3088	0.21619
						PEX34	0.5746	0.22952
						KAR4	0.91969	0.72177
						SPB1	1.0352	0.95491
						PBN1	0.97873	0.93716
						LRE1	1.4023	0.015056
						APA1	0.95627	0.81852
						YCL049C	0.74014	0.12085
						YCL048W-A	1.1611	0.70964
						SPS22	0.65205	0.17456
						POF1	1.0376	0.82669
						EMC1	0.61424	0.12745
						YCL046W	0.65415	0.41227
						MGR1	0.89665	0.66062
						PDI1	0	0.18786
						YCL041C	0.87425	0.62134
						YCL042W	0.92542	0.79366
						GLK1	0.87649	0.21852
						GID7	0.7052	0.048201
						ATG22	0.84392	0.26395
						SRO9	0.91788	0.58438
						GFD2	0.94778	0.78271
						GRX1	0.94121	0.82768
						LSB5	1.1122	0.59165
						MXR2	1.1133	0.74886
						STE50	1.1319	0.39877
						RRP7	1.23	0.79978
						HIS4	1.013	0.94107
						BIK1	0.88629	0.59233
						RNQ1	1.1145	0.41666
						FUS1	0.9997	0.99798
						HBN1	1.0154	0.95206
						FRM2	1.1043	0.41235
						AGP1	0.96597	0.73602
						YCL023C	0.85054	0.43823
						KCC4	1.0589	0.60558
						YCL022C	1.0606	0.69504
						YCL021W-A	0.89933	0.36333
						LEU2	NaN	NaN
						NFS1	1.4952	0.67822
						DCC1	1.0624	0.79824
						BUD3	1.124	0.25664
						YCL012C	0.98597	0.95168
						GBP2	0.85686	0.25077
						SGF29	0.70615	0.35653
						ILV6	0.89409	0.49151
						STP22	0.92881	0.79573
						YCL007C	0.91577	0.70061
						VMA9	0.81508	0.79553
						LDB16	1.0021	0.99436
						PGS1	0.25366	0.16328
						YCL002C	0.75912	0.17735
						RER1	0.66263	0.52628
						YCL001W-A	0.81336	0.75944
						YCL001W-B	1.1768	0.43248
						YCR001W	0.92036	0.69732
						CDC10	0.76893	0.71217
						MRPL32	0.44849	0.03781
						YCP4	1.0341	0.9027
						CIT2	1.2214	0.13026
						YCR006C	1.0874	0.78729
						YCR007C	0.93112	0.80254
						SAT4	1.0123	0.94365
						RVS161	0.63726	0.4288
						ADY2	0.91116	0.69119
						ADP1	0.92969	0.39518
						PGK1	1.4595	0.66819
						YCR013C	0.97799	0.95233
						POL4	0.98751	0.89839
						YCR015C	0.75749	0.18182
						YCR016W	0.8151	0.33024
						CWH43	0.8198	0.23174
						SRD1	0.76778	0.38241
						YCR018C-A	1.1089	0.70169
						MAK32	0.99347	0.95966
						PET18	0.88968	0.64531
						MAK31	0.40469	0.1711
						HTL1	0.43339	0.49684
						HSP30	1.114	0.32909
						YCR022C	0.89039	0.23092
						YCR023C	1.1027	0.2968
						SLM5	0.11807	0.066881
						YCR024C-B	0.79349	0.46479
						PMP1	0.84144	0.54256
						YCR025C	0.98516	0.93576
						NPP1	0.94512	0.63674
						RHB1	0.99429	0.98981
						FEN2	0.7515	0.4677
						RIM1	0	0.19766
						SYP1	1.3053	0.15497
						RPS14A	0.85057	0.73221
						BPH1	0.74462	0.028528
						SNT1	1.4325	0.14308
						ELO2	1.2211	0.69061
						RRP43	1.9281	0.57318
						RBK1	1.0361	0.65991
						PHO87	0.79989	0.27545
						BUD5	1.113	0.82925
						YCR038W-A	1.0989	0.82165
						MATALPHA2	0.76599	0.84116
						MATALPHA1	NaN	NaN
						YCR041W	0.63328	0.5478
						TAF2	0.62891	0.34695
						YCR043C	1.3489	0.30525
						PER1	0.30044	0.34217
						RRT12	0.83823	0.14074
						YCR045W-A	0.68323	0.15816
						IMG1	0.26675	0.082373
						BUD23	0.54396	0.17573
						YCR047W-A	0	0.43889
						YCR049C	0.98494	0.92102
						ARE1	0.98215	0.90843
						YCR050C	0.91301	0.67721
						YCR051W	0.92232	0.77839
						RSC6	0.85439	0.77412
						THR4	0.62621	0.2565
						CTR86	1.5169	0.28446
						PWP2	1.1705	0.73067
						YIH1	0.85181	0.50647
						TAH1	0.71972	0.59038
						YCR061W	0.98557	0.91461
						YCR064C	1.0015	0.99448
						BUD31	1.7162	0.13021
						HCM1	0.98558	0.88367
						RAD18	1.3165	0.53136
						SED4	0.95582	0.75333
						ATG15	0.95825	0.77749
						CPR4	1.1262	0.61559
						IMG2	0.15498	0.24306
						RSA4	NaN	NaN
						SSK22	1.1984	0.19052
						SOL2	1.0144	0.9375
						ERS1	0.77847	0.30021
						YCR075W-A	0.35346	0.1552
						FUB1	0.85536	0.69597
						PAT1	0.61835	0.29906
						PTC6	0.7168	0.11943
						SRB8	3.9965	0.0024787
						YCR081C-A	5.067	0.00040044
						AHC2	1.5278	0.26848
						TRX3	1.1841	0.51408
						TUP1	0.77604	0.70502
						YCR085W	0.69338	0.34039
						CSM1	0.46682	0.13157
						YCR087W	1.1572	0.58069
						YCR087C-A	1.1937	0.54526
						ABP1	1.2025	0.014779
						FIG2	0.85071	0.42871
						YCR090C	0.7827	0.52513
						KIN82	1.1647	0.36369
						MSH3	0.87019	0.61466
						CDC39	0.95882	0.92451
						CDC50	0.39234	0.40339
						OCA4	1.6244	0.10612
						YCR095W-A	1.3442	0.72638
						HMRA2	NaN	NaN
						HMRA1	0.046467	0.066155
						YCR097W-A	0.46809	0.38395
						GIT1	0.93178	0.78995
						YCR099C	0.62428	0.43179
						YCR100C	0.90033	0.78402
						YCR101C	0.4928	0.15883
						YCR102C	1.3038	0.40447
						YCR102W-A	1.1424	0.90301
						PAU3	1.2117	0.49851
						ADH7	1.2764	0.21777
						RDS1	1.0672	0.8314
						AAD3	0.78428	0.49525
						YCR108C	1.2423	0.47894
						COS7	2.1367	0.061958
						YDL247W-A	0	0.704
						MPH2	1.0065	0.99609
						SOR2	3.9801	0.069603
						HXT15	1.0348	0.96426
						THI13	0.96515	0.93926
						AAD4	1.1413	0.55167
						YDL242W	0.89053	0.73163
						YDL241W	0.37123	0.13734
						YDL240C-A	1.0955	0.57542
						LRG1	0.9289	0.61455
						ADY3	0.95883	0.74467
						GUD1	0.81829	0.46299
						AIM6	0.9903	0.97316
						PHO13	1.6972	0.098654
						YPD1	0.71845	0.51388
						GYP7	1.2881	0.012393
						MFG1	1.101	0.6519
						OST4	NaN	NaN
						BRE4	0.88779	0.27581
						PTP1	1.0418	0.90498
						SSB1	0.81434	0.46074
						YDL228C	0.82428	0.57463
						HO	1.0821	0.70788
						GCS1	1.2607	0.44024
						SHS1	0.87399	0.7338
						WHI4	1.3844	0.41534
						HBT1	1.1191	0.36638
						FMP45	0.82917	0.72274
						YDL221W	1.1011	0.6688
						CDC13	1.094	0.7053
						DTD1	1.8204	0.37189
						YDL218W	1.2143	0.37189
						TIM22	0.48405	0.55618
						RRI1	0.9004	0.70794
						GDH2	1.1184	0.26407
						PRR2	1.0047	0.97825
						NOP6	2.1201	0.011938
						SHR3	0.55614	0.37817
						YDL211C	1.0311	0.91336
						UGA4	1.1754	0.3574
						CWC2	0.68117	0.77564
						NHP2	0.74835	0.38481
						GLE1	1.3805	0.31244
						YDL206W	1.6479	0.050123
						HEM3	1.3011	0.87991
						RTN2	1.0889	0.69262
						ACK1	1.3235	0.032584
						MRPL11	0.10921	0.076586
						TRM8	1.1247	0.40512
						MGT1	1.2297	0.55689
						YDL199C	0.96844	0.87343
						GGC1	0.18189	0.15668
						ASF2	0.9873	0.96199
						YDL196W	1.0752	0.31754
						SEC31	1.0673	0.95625
						SNF3	1.0759	0.6859
						NUS1	0.5827	0.60673
						ARF1	0.71675	0.46389
						RPL35A	0.3827	0.6136
						UFD2	1.1506	0.67745
						RBS1	0.80788	0.56509
						PPH22	0.9344	0.83021
						YDL187C	1.3982	0.36309
						YDL186W	1.3528	0.21712
						YDL185C-A	1.4209	0.50755
						VMA1	1.8611	0.14782
						RPL41A	NaN	NaN
						YDL183C	1.1335	0.26326
						LYS20	1.1643	0.55252
						INH1	1.0108	0.97503
						YDL180W	1.1408	0.60604
						PCL9	1.1015	0.7799
						DLD2	0.80948	0.34172
						YDL177C	1.5508	0.065247
						YDL176W	1.0056	0.96636
						AIR2	1.264	0.065371
						DLD1	1.2311	0.089959
						PAR32	0.86525	0.62128
						YDL172C	0.90219	0.64492
						GLT1	1.0883	0.62831
						UGA3	1.0551	0.42626
						UGX2	1.1234	0.60858
						SFA1	1.6454	0.063606
						NRP1	0.90113	0.759
						FAP7	1.3835	0.64964
						CDC36	1.061	0.9052
						CDC9	0.73013	0.51892
						YDL163W	0.81156	0.66973
						YDL162C	1.1068	0.19447
						ENT1	1.3124	0.10369
						MHF2	0.60781	0.4024
						DHH1	1.357	0.45018
						YDL159W-A	1.0235	0.90426
						STE7	1.2436	0.036202
						YDL159C-B	1.1545	0.82252
						YDL158C	0.89829	0.86845
						YDL157C	0.91947	0.88221
						CMR1	1.3236	0.098539
						CLB3	1.3922	0.017569
						MSH5	1.1206	0.49492
						SAS10	1.8918	0.32079
						YDL152W	1.2068	0.42361
						BUD30	3.1274	0.016359
						RPC53	3.1936	0.013711
						ATG9	0.74573	0.47562
						NOP14	0.97363	0.91065
						RPN5	0.64218	0.70988
						LDB17	0.94636	0.8385
						COP1	0.80127	0.77286
						YDL144C	0.62759	0.079756
						CCT4	0	0.39359
						CRD1	0.75836	0.39087
						BPL1	0.37522	0.27618
						RPO21	1.0622	0.87097
						SCM3	0.68603	0.7462
						RGT2	1.382	0.034888
						ARF2	1.0385	0.78893
						RPL35B	0.7333	0.59771
						RDI1	0.77295	0.48899
						PPH21	1.1436	0.10347
						RPL41B	0	0.37806
						SRF1	1.3603	0.12925
						CDC53	1.9172	0.17978
						LYS21	0.94289	0.59985
						STF1	1.637	0.055242
						RPP1B	1.5309	0.067881
						YDL129W	1.402	0.0372
						VCX1	1.4593	0.1328
						PCL2	1.1256	0.62744
						CDC48	1.0786	0.91303
						HNT1	1.0553	0.76566
						YDL124W	0.86381	0.32416
						SNA4	0.57145	0.087176
						UBP1	1.2423	0.42897
						YDL121C	0.68746	0.36951
						YFH1	2.8593	0.28462
						YDL119C	1.036	0.90428
						YDL118W	1.8011	0.089219
						CYK3	1.0043	0.98151
						NUP84	1.1912	0.81267
						IWR1	1.0474	0.87751
						YDL114W-A	0	0.704
						YDL114W	1.3116	0.10853
						ATG20	0.86047	0.58169
						TRM3	0.98474	0.84753
						RRP42	0.47256	0.23427
						TMA17	1.5946	0.073577
						YDL109C	1.2644	0.18141
						KIN28	0.98133	0.93935
						MSS2	0.21929	0.011257
						PHO2	0.75735	0.61457
						NSE4	0.76228	0.80885
						QRI7	0.8536	0.5103
						QRI1	1.7229	0.24706
						POL3	1.6048	0.20931
						DUN1	1.3374	0.26023
						GET3	0.91159	0.80684
						BUG1	1.3591	0.12038
						SNU23	0.77998	0.53997
						RPN6	0	0.25242
						OPI6	0.83549	0.59789
						PMT1	0.89809	0.68627
						YDL094C	1.2114	0.36846
						PMT5	1.0369	0.49294
						SRP14	1.4377	0.23016
						UBX3	1.2372	0.19428
						RAM1	0.69047	0.60164
						NUR1	1.0041	0.97601
						ASM4	0.73429	0.12066
						LUC7	1.0402	0.90957
						YDL086W	0.76079	0.12995
						YDL086C-A	0.80723	0.3891
						YDL085C-A	0.66932	0.35148
						NDE2	0.94395	0.72961
						SUB2	2.1156	0.17956
						RPS16B	0.87012	0.70786
						RPL13A	1.1518	0.59988
						RPP1A	0.66083	0.5313
						THI3	0.95441	0.78851
						MRK1	0.76245	0.013473
						MDH3	0.85019	0.64901
						VAM6	0.26848	0.038895
						RXT3	1.4356	0.17287
						RPL31A	0	0.34747
						BRE1	1.0483	0.91632
						YDL073W	0.84429	0.53382
						YET3	0.56159	0.063178
						YDL071C	1.1185	0.71102
						BDF2	1.3677	0.13224
						CBS1	0.22368	0.060484
						YDL068W	0	0.078626
						COX9	0	0.23905
						IDP1	1.1375	0.43991
						PEX19	1.2699	0.37739
						UBC9	5.342	0.15098
						SYO1	0.62149	0.1932
						YDL062W	1.0063	0.97697
						RPS29B	0.58315	0.55136
						TSR1	0.74331	0.8197
						RAD59	0.90985	0.75582
						USO1	1.252	0.14355
						YDL057W	1.3836	0.12544
						MBP1	1.1573	0.39463
						PSA1	0.37234	0.59705
						MCH1	0.84184	0.060503
						PBP4	1.0542	0.8809
						SLC1	0.82478	0.42956
						LHP1	0.8999	0.69091
						YDL050C	0.87606	0.78491
						KNH1	0.98902	0.9519
						STP4	1.0382	0.71297
						SIT4	0.68107	0.39107
						NPC2	0.76538	0.2655
						MRP10	0.86125	0.6302
						FAD1	0.46616	0.40756
						MTF2	0.18179	0.014266
						PRP11	0.80647	0.67578
						SIR2	1.1417	0.076086
						YDL041W	1.1458	0.29997
						NAT1	0.99797	0.99005
						PRM7	0.75397	0.26659
						BSC1	0.82315	0.37662
						PUS9	0.93892	0.6631
						GPR1	0.69209	0.12946
						YDL034W	0.60347	0.32028
						SLM3	0.86896	0.42342
						YDL032W	0.96133	0.88893
						DBP10	0.98411	0.97256
						PRP9	0.94587	0.91425
						ARP2	1.6613	0.40299
						MPS1	0.94932	0.93088
						YDL027C	1.0279	0.91019
						YDL026W	0.85593	0.81562
						RTK1	0.88804	0.63739
						YDL025W-A	0	0.2138
						DIA3	0.88859	0.44329
						YDL022C-A	1.0422	0.78265
						YDL023C	0.8152	0.3101
						GPD1	0.89193	0.19909
						GPM2	0.9301	0.62369
						RPN4	0.7738	0.20391
						OSH2	0.83796	0.045226
						ERP3	1.0407	0.86494
						CDC7	1.3273	0.38609
						YDL016C	1.1841	0.35299
						TSC13	0	0.704
						NOP1	0	0.704
						SLX5	0.47675	0.18299
						YDL012C	1.15	0.3854
						YDL011C	1.3345	0.064724
						GRX6	1.1351	0.43745
						YDL009C	1.1218	0.73076
						APC11	0.8667	0.4753
						YDL007C-A	0.80707	0.29113
						RPT2	0	0.24594
						PTC1	0.62674	0.6018
						MED2	1.1635	0.56609
						ATP16	0	0.17269
						MCD1	0.91556	0.40356
						NHP10	0.92525	0.80291
						RMD1	0.8926	0.65564
						NTH1	0.90762	0.56648
						YRB1	0.45255	0.11301
						RCR2	1.0867	0.72813
						YDR003W-A	1.1849	0.58058
						RAD57	1.031	0.84477
						MAF1	0.60709	0.26286
						SOK1	0.93863	0.80693
						TRP1	1.1523	0.57905
						YDR008C	1.2008	0.55878
						GAL3	1.0167	0.92748
						YDR010C	0.89259	0.66375
						SNQ2	0.88325	0.29952
						RPL4B	0.84991	0.39564
						PSF1	0.82543	0.88849
						RAD61	1.0152	0.92569
						HED1	0.7001	0.27197
						YDR015C	0.53711	0.26392
						DAD1	0.32235	0.36274
						KCS1	0.92602	0.39611
						YDR018C	0.93082	0.50084
						GCV1	0.94051	0.24292
						DAS2	1.1732	0.34905
						FAL1	1.5268	0.54599
						ATG31	0.71622	0.19729
						SES1	0.84934	0.73957
						FYV1	1.102	0.62553
						RPS11A	0.71289	0.62569
						NSI1	1.0384	0.77022
						VPS54	0.64207	0.48721
						REG1	1.0229	0.86176
						YDR029W	0.8605	0.76916
						RAD28	1.3608	0.062383
						MIX14	1.2377	0.6824
						PST2	1.1306	0.50639
						MRH1	0.88414	0.45968
						LYS14	1.0902	0.77351
						YDR034C-A	0.83733	0.79088
						YDR034W-B	0.71791	0.56523
						ARO3	1.1821	0.043941
						EHD3	1.2001	0.11225
						KRS1	2.1085	0.11612
						ENA5	1.4735	0.078096
						ENA2	0	0.54518
						ENA1	1.2373	0.37435
						RSM10	0.48232	0.22073
						YDR042C	0.43751	0.17775
						NRG1	0.92682	0.71795
						HEM13	Inf	0
						RPC11	4.3276	0.24587
						BAP3	1.2642	0.23547
						HEM12	2.1401	0.28001
						YDR048C	1.0038	0.97805
						VMS1	0.26166	0.32402
						TPI1	0	0.22016
						DET1	1.6398	0.011405
						DBF4	1.6789	0.54385
						YDR053W	NaN	NaN
						CDC34	1.7463	0.0089235
						PST1	0.9596	0.87414
						YDR056C	1.1263	0.5086
						YOS9	0.77387	0.33953
						TGL2	0.91479	0.68488
						UBC5	0.92876	0.84032
						MAK21	1.334	0.26296
						YDR061W	1.2616	0.23423
						LCB2	0	0.50154
						AIM7	1.0143	0.91052
						RPS13	0	0.54688
						RRG1	0.1194	0.094781
						RTR2	1.0014	0.9951
						OCA6	1.8262	0.0012262
						DOS2	1.1562	0.63491
						DOA4	0.65768	0.58613
						FMP16	1.0005	0.99909
						PAA1	1.1575	0.77209
						IPT1	1.1662	0.19038
						SNF11	1.1822	0.038592
						TPS2	0.72208	0.40144
						PPH3	0.76654	0.050153
						RAD55	0.85444	0.14155
						SED1	1.2217	0.55072
						SHU2	1.2403	0.37436
						PET100	0.40342	0.073169
						TFB5	0.69824	0.77952
						VPS41	0.077562	0.14345
						PDC2	1.0873	0.94815
						STN1	0.18422	0.25082
						RRP8	0.91735	0.72238
						TVP23	1.0784	0.85675
						AFR1	1.5043	0.072764
						SSS1	2.7431	0.3139
						RRP1	3.3578	0.082851
						SLU7	0.87336	0.44115
						YDR089W	0.99595	0.9854
						YDR090C	1.1226	0.66156
						RLI1	NaN	NaN
						UBC13	1.8063	0.15967
						DNF2	1.1164	0.27725
						YDR094W	1.1503	0.38754
						YDR095C	1.1267	0.68718
						GIS1	1.595	0.021198
						MSH6	0.99123	0.9228
						GRX3	1.4248	0.31728
						BMH2	1.0136	0.88908
						TVP15	1.1431	0.4435
						ARX1	0.90143	0.70586
						YDR102C	0.89804	0.56384
						STE5	1.0668	0.67174
						SPO71	1.3904	0.096261
						TMS1	1.162	0.54985
						ARP10	1.3571	0.085936
						TMN2	1.0031	0.98936
						TRS85	0.81816	0.55983
						YDR109C	0.99581	0.98842
						FOB1	0.84516	0.51458
						ALT2	0.88722	0.63745
						IRC2	0.81852	0.54507
						PDS1	0.67402	0.13306
						YDR114C	1.2992	0.2758
						YDR115W	0	0.11571
						MRPL1	1.31	0.34427
						TMA64	1.0128	0.97013
						APC4	1.0959	0.75456
						YDR118W-A	1.0517	0.88768
						VBA4	1.0426	0.62552
						COX26	1.009	0.99057
						TRM1	1.2007	0.60475
						DPB4	1.254	0.46467
						KIN1	1.3149	0.078482
						INO2	0.30704	0.66873
						YDR124W	1.2748	0.21486
						ECM18	0.82891	0.48377
						SWF1	1.0614	0.90574
						ARO1	0.63772	0.49629
						MTC5	1.1857	0.14887
						SAC6	0.19884	0.15919
						FIN1	0.68442	0.30365
						YDR131C	1.1072	0.57893
						YDR132C	1.0847	0.74274
						YDR133C	0	0.25898
						YCF1	1.176	0.45784
						VPS61	1.4633	0.019959
						RGP1	1.6145	0.46899
						HPR1	1.8363	0.060522
						RUB1	1.3716	0.56066
						MTQ2	1.2605	0.72711
						DOP1	0	0.0076073
						PEX7	1.609	0.055159
						SAN1	1.7753	0.068307
						MKC7	0.87266	0.6032
						TAF12	0.50003	0.21502
						SWI5	1.0353	0.89699
						EKI1	1.2497	0.11301
						KGD2	1.1178	0.66472
						YDR149C	0.84375	0.76598
						NUM1	0.78696	0.31036
						CTH1	1.7516	0.036353
						GIR2	1.4282	0.071145
						ENT5	1.3608	0.24048
						YDR154C	1.3351	0.61131
						CPR1	2.3196	0.029823
						RPA14	1.1364	0.36309
						YDR157W	1.3662	0.086284
						HOM2	0.39344	0.02571
						SAC3	1.1495	0.48827
						SSY1	0	0.39858
						YDR161W	0.80123	0.70108
						NBP2	1.2655	0.59621
						CWC15	0.92988	0.85172
						SEC1	1.3718	0.75967
						TRM82	1.1672	0.38313
						SEC5	1.0333	0.66029
						TAF10	0.30642	0.087574
						CDC37	0.67622	0.6504
						STB3	1.3768	0.18565
						YDR169C-A	0.63102	0.40092
						SEC7	1.7728	0.19489
						HSP42	0.6454	0.17214
						SUP35	0.96288	0.97504
						ARG82	0.51631	0.59242
						HMO1	1.0855	0.82969
						RSM24	0.056212	0.085816
						NGG1	0.68616	0.5236
						UBC1	2.0525	0.40797
						SDH4	1.733	0.15803
						CSN9	1.3442	0.44664
						YDR179W-A	2.0876	0.045927
						SCC2	0	0.40301
						SAS4	1.2877	0.055361
						CDC1	0	0.37803
						YDR182W-A	0.74158	0.40474
						PLP1	0.64212	0.073109
						YDR183C-A	1.3874	0.57373
						ATC1	1.2358	0.3163
						UPS3	0.94413	0.72446
						YDR186C	1.3805	0.48982
						YDR187C	0.75334	0.44699
						CCT6	1.0766	0.91004
						SLY1	2.2645	0.13408
						RVB1	NaN	NaN
						HST4	1.2501	0.39327
						NUP42	1.1006	0.55165
						YDR193W	1.0271	0.92294
						MSS116	0.23557	0.019139
						YDR194W-A	0.45006	0.47132
						REF2	0.89516	0.76746
						CAB5	0.91569	0.93844
						CBS2	0	0.0054482
						RKM2	0.61716	0.21463
						YDR199W	0.76144	0.52081
						VPS64	0.90735	0.76521
						SPC19	1.5268	0.54599
						RAV2	1.5199	0.25079
						YDR203W	1.0726	0.84478
						COQ4	0.44606	0.056356
						MSC2	1.3505	0.023792
						EBS1	1.1866	0.3934
						UME6	0.97815	0.94878
						MSS4	0.61739	0.17074
						YDR209C	1.5384	0.46939
						YDR210W	2.8033	0.17136
						GCD6	1.3804	0.68104
						TCP1	4.9503	0.1821
						UPC2	1.3288	0.081826
						AHA1	1.5419	0.2074
						YDR215C	1.0863	0.63962
						ADR1	1.3907	0.1413
						RAD9	0.91673	0.8568
						SPR28	1.0513	0.88535
						MFB1	0.3161	0.068009
						YDR220C	1.0802	0.8511
						GTB1	1.4308	0.10125
						YDR222W	1.8106	0.018018
						CRF1	1.3786	0.028249
						HTB1	1.1323	0.8541
						HTA1	1.9197	0.096651
						ADK1	0.49565	0.71868
						SIR4	1.6053	0.10019
						PCF11	0.45206	0.48213
						IVY1	1.5812	0.085311
						YDR230W	0.95375	0.79078
						COX20	0.55404	0.01898
						HEM1	3.3159	0.064998
						RTN1	1.9431	0.19932
						LYS4	0.16596	0.35579
						PRP42	2.5549	0.070994
						FMN1	1.3687	0.81109
						MRPL7	0	0.081549
						SEC26	6.4032	0.037563
						YDR239C	1.493	0.059538
						SNU56	2.7064	0.02404
						BUD26	1.7161	0.10561
						AMD2	0.94711	0.81274
						PRP28	0	0.47796
						PEX5	1.1881	0.52967
						MNN10	0.67247	0.62303
						TRS23	1.5757	0.47625
						YDR246W-A	1.3472	0.032254
						VHS1	0.63166	0.27696
						YDR248C	1.1396	0.76807
						YDR249C	1.5462	0.0012287
						YDR250C	1.3976	0.11144
						PAM1	0.86139	0.50664
						BTT1	1.312	0.31829
						MET32	1.0186	0.97138
						CHL4	1.8167	0.0034098
						RMD5	0.9375	0.887
						CTA1	1.23	0.41518
						RKM4	1.1901	0.68237
						HSP78	0.93251	0.88147
						YAP6	1.4066	0.21289
						SWM1	0.93529	0.68657
						EXG2	0.77445	0.091996
						YDR262W	0.71049	0.54115
						DIN7	0.97089	0.89702
						AKR1	0.72839	0.70076
						PEX10	1.1531	0.75346
						HEL2	0.95057	0.81402
						CIA1	0	0.1785
						MSW1	0.23502	0.18358
						YDR269C	2.0054	0.23575
						CCC2	1.28	0.38263
						YDR271C	1.1083	0.72161
						GLO2	1.0491	0.91453
						DON1	0.83879	0.64578
						YDR274C	1.2025	0.19013
						BSC2	1.3098	0.35913
						PMP3	0.52986	0.54165
						MTH1	1.2207	0.45195
						YDR278C	1.3705	0.41878
						RNH202	1.1904	0.37093
						RRP45	0	0.19335
						PHM6	1.4203	0.31486
						YDR282C	1.3968	0.41387
						GCN2	0.97336	0.90729
						DPP1	1.2816	0.15987
						ZIP1	1.0706	0.80021
						YDR286C	0.89331	0.82796
						INM2	1.5754	0.28561
						NSE3	1.1606	0.9026
						RTT103	1.7631	0.24134
						YDR290W	1.0863	0.88394
						HRQ1	1.3072	0.31158
						SRP101	0	0.63465
						SSD1	1.3526	0.0013995
						DPL1	1.7365	0.491
						HDA2	1.1198	0.75523
						MHR1	0.65709	0.43791
						SUR2	0.36187	0.21393
						ATP5	0	0.010021
						BFR2	0	0.38463
						PRO1	0.68512	0.44772
						CFT1	1.3118	0.87053
						GPI11	3.9344	0.045839
						RSC3	0	0.19335
						CPR5	1.7618	0.11836
						HNT2	1.6942	0.083284
						YDR306C	1.3624	0.065778
						PMT7	1.2374	0.11386
						SRB7	0	0.49159
						GIC2	0.94603	0.49443
						SUM1	0.98266	0.89224
						TFB1	1.4604	0.35487
						SSF2	1.3915	0.2271
						PIB1	0.96226	0.67876
						RAD34	0.93158	0.76234
						IPK1	0.93768	0.91977
						OMS1	1.0463	0.89746
						HIM1	1.0504	0.86889
						MCM21	1.4846	0.33737
						YFT2	1.8292	0.14481
						SWA2	0.81898	0.75817
						DAD4	0	0.704
						YDR320W-B	1.218	0.44509
						ASP1	0.93903	0.8764
						MRPL35	0.15199	0.066281
						TIM11	0.2963	0.50568
						PEP7	1.1038	0.79656
						UTP4	0.7953	0.80974
						YCG1	0.62135	0.49547
						YSP2	1.1793	0.41582
						YDR327W	0.54145	0.49106
						SKP1	0	0.31603
						PEX3	1.2875	0.47991
						UBX5	1.0187	0.92239
						GPI8	0.72248	0.60487
						IRC3	0.2047	0.10764
						RQC1	0.95571	0.80303
						SWR1	2.5127	0.0034896
						MSN5	1.0863	0.68102
						YDR336W	1.7201	0.0075996
						MRPS28	0.30614	0.39091
						YDR338C	1.0391	0.76121
						FCF1	2.9361	0.14222
						YDR340W	1.3474	0.26698
						YDR341C	0	0.39949
						HXT7	0.92498	0.93601
						HXT6	0	0.020414
						YDR344C	0.95284	0.69215
						HXT3	1.6311	0.044654
						SVF1	0.94855	0.80862
						MRP1	0.074612	0.19439
						PAL1	1.3567	0.27966
						YPS7	0.73717	0.20745
						ATP22	0.62176	0.47377
						SBE2	1.7778	0.018623
						YPQ2	0.89044	0.64047
						TRR1	1.4197	0.67078
						TRP4	0.7067	0.55908
						YDR354C-A	0	0.54495
						YDR355C	NaN	NaN
						SPC110	1.9161	0.22346
						CNL1	1.1944	0.43878
						GGA1	0.96702	0.94842
						EAF1	1.0974	0.72997
						OPI7	1.2283	0.75263
						BCP1	0	0.56435
						TFC6	2.0228	0.16093
						ESC2	0.94259	0.90547
						SEM1	0	0.079264
						CDC40	0.33746	0.4979
						ESF1	1.3519	0.73575
						YDR366C	0.8678	0.46102
						KEI1	0.99066	0.99224
						YPR1	1.0883	0.75224
						XRS2	1.1147	0.63773
						DXO1	1.0469	0.82138
						CTS2	1.1059	0.73734
						YDR371C-A	1.29	0.8634
						VPS74	1.0175	0.98729
						FRQ1	1.9281	0.57318
						PHO92	0.84754	0.51861
						WIP1	12.3043	0.0099187
						BCS1	0.13603	0.024576
						ARH1	0.86441	0.81589
						ATP17	0.38386	0.14434
						LSM6	0	0.49071
						RGA2	1.2072	0.17099
						SDH6	1.1108	0.73316
						ARO10	1.4064	0.13392
						YRA1	0	0.19242
						YDR381C-A	2.0585	0.46041
						RPP2B	1.1834	0.77502
						NKP1	1.0209	0.92235
						ATO3	1.1333	0.58489
						EFT2	0	0.2237
						MUS81	1.2112	0.37826
						YDR387C	1.3809	0.057234
						RVS167	0.91606	0.76648
						SAC7	0.76204	0.37751
						UBA2	1.1838	0.76624
						YDR391C	1.0521	0.87671
						SPT3	0.81444	0.53456
						SHE9	0.88562	0.45571
						RPT3	9.9006	0.022088
						SXM1	0.55834	0.086707
						YDR396W	0.39281	0.15499
						NCB2	0.46418	0.24568
						UTP5	1.3734	0.4873
						HPT1	2.2287	0.011884
						URH1	1.0576	0.86504
						YDR401W	1.3331	0.092059
						DIT2	1.2488	0.24308
						DIT1	0.8805	0.33876
						RPB7	0	0.704
						MRP20	0.33785	0.097382
						PDR15	1.0467	0.79719
						YDR406W-A	1.2646	0.52293
						TRS120	1.1291	0.84157
						ADE8	2.6677	0.347
						SIZ1	1.2379	0.28815
						STE14	1.5742	0.12256
						DFM1	1.5476	0.028535
						RRP17	1.3335	0.73909
						YDR413C	1.6639	0.61809
						ERD1	0.85931	0.47757
						YDR415C	1.3952	0.2424
						SYF1	1.5997	0.076904
						YDR417C	1.4061	0.73761
						RPL12B	1.1545	0.9232
						RAD30	1.2136	0.56489
						HKR1	1.0292	0.74715
						ARO80	1.0059	0.98399
						SIP1	1.3503	0.22916
						CAD1	0.86409	0.57907
						DYN2	1.19	0.57903
						SNX41	0.78885	0.21019
						YDR426C	0.59583	0.25282
						RPN9	0.33692	0.42847
						BNA7	0.93677	0.87574
						TIF35	0.72778	0.78034
						CYM1	1.1596	0.26061
						YDR431W	0.98673	0.93947
						NPL3	1.08	0.95087
						YDR433W	1.2123	0.86993
						GPI17	1.589	0.36615
						PPM1	0.93986	0.84648
						PPZ2	1.2528	0.26257
						GPI19	0.55753	0.2608
						THI74	1.0773	0.76954
						LRS4	0.45755	0.34939
						DOT1	1.5771	0.20096
						APT2	0.8	0.11223
						YDR442W	2.3076	0.027235
						SSN2	3.1531	0.0057254
						YDR444W	1.2121	0.4136
						YDR445C	0.85164	0.33668
						ECM11	0.93143	0.85977
						RPS17B	0.91631	0.81509
						ADA2	0.44812	0.30642
						UTP6	4.91	0.02003
						RPS18A	1.2485	0.47106
						YHP1	0.97118	0.86967
						PPN1	1.4039	0.085788
						TSA2	0.97326	0.85844
						GUK1	0	0.38966
						YDR455C	1.2099	0.49537
						NHX1	0.95039	0.89879
						TOM1	1.696	0.074164
						HEH2	1.331	0.22004
						PFA5	1.0828	0.67546
						TFB3	0.36079	0.25046
						MFA1	1.4743	0.5461
						YDR461C-A	1.6055	0.38655
						MRPL28	0.62676	0.59557
						STP1	1.1314	0.75965
						SPP41	0.83488	0.72402
						YDR464C-A	2.3264	0.050935
						RMT2	0.68349	0.11071
						PKH3	1.2011	0.28522
						YDR467C	1.2094	0.58558
						TLG1	0.71453	0.62162
						SDC1	0.94991	0.9153
						UGO1	0.33308	0.39378
						RPL27B	1.2143	0.63558
						TRS31	0.8564	0.81881
						PRP3	1.1383	0.73721
						JIP4	1.0238	0.92272
						YDR476C	1.0807	0.75626
						SNF1	2.6645	0.0088316
						SNM1	2.7431	0.3139
						PEX29	1.1431	0.66539
						DIG2	0.88552	0.63586
						PHO8	1.2993	0.39422
						CWC21	0.92764	0.59878
						KRE2	0.81563	0.64395
						VPS52	0.32377	0.15289
						VPS72	1.4546	0.029285
						VPS60	1.3694	0.27219
						RIB3	NaN	NaN
						PAC11	0.68515	0.071105
						SLD5	5.342	0.15098
						PKH1	1.303	0.050005
						YDR491C	0.96092	0.68792
						IZH1	1.2211	0.36484
						MZM1	1.9871	0.12474
						RSM28	1.1611	0.7956
						VPS3	1.2071	0.66953
						PUF6	1.1224	0.27712
						ITR1	1.6172	0.0041275
						SEC20	1.2223	0.227
						LCD1	1.7149	0.11063
						RPL37B	1.2179	0.7207
						PLM2	1.2597	0.51018
						SAM2	1.0048	0.98718
						LPP1	1.433	0.099707
						SPG3	1.0285	0.96514
						PSP1	1.4436	0.041912
						GMC1	1.3415	0.13101
						GIN4	1.1257	0.52986
						GNP1	1.1804	0.47049
						YDR509W	1.2953	0.44687
						SMT3	0	0.704
						YDR510C-A	2.21	0.14862
						SDH7	1.1984	0.56377
						EMI1	1.1424	0.25535
						GRX2	0.73562	0.34215
						YDR514C	1.2821	0.086026
						SLF1	0.89593	0.87807
						EMI2	0.83751	0.634
						GRH1	1.2413	0.13184
						EUG1	1.005	0.9829
						FPR2	0.69474	0.61631
						URC2	0.86506	0.42502
						YDR521W	1.3037	0.48078
						SPS2	1.4697	0.12131
						SPS1	1.2716	0.29514
						AGE1	0.72309	0.16288
						YDR524W-C	1.6464	0.21196
						YDR524C-B	0.24856	0.44281
						YDR524C-A	1.087	0.76283
						API2	1.0218	0.91468
						SNA2	0.59011	0.049933
						YDR526C	0	0.3851
						RBA50	0.93075	0.9007
						HLR1	0.9456	0.66161
						QCR7	0.60509	0.23114
						APA2	1.0381	0.87211
						CAB1	1.5928	0.64628
						KRE28	0.60638	0.52665
						HSP31	1.0477	0.87454
						FIT1	1.1576	0.47245
						YDR535C	1.3876	0.11833
						STL1	1.0156	0.89385
						YDR537C	1.2609	0.61239
						PAD1	1.1724	0.66384
						FDC1	0.91431	0.84937
						IRC4	1.7204	0.060057
						YDR541C	1.131	0.56506
						PAU10	0	0.59421
						YDR543C	0.66035	0.42726
						YDR544C	0.65829	0.65786
						YRF1-1	NaN	NaN
						YDR545C-A	NaN	NaN
						YEL077C	1.1292	0.76396
						YEL077W-A	1.5353	0.59881
						YEL076C-A	NaN	NaN
						YEL076C	NaN	NaN
						YEL075W-A	2.0426	0.53495
						YEL075C	2.0426	0.53495
						YEL074W	0.92463	0.55863
						YEL073C	1.408	0.23991
						RMD6	1.3496	0.07404
						DLD3	1.3511	0.07476
						DSF1	1.2469	0.26714
						HXT13	1.0904	0.73612
						YEL068C	0.51123	0.069716
						YEL067C	0.90428	0.50083
						HPA3	1.2361	0.53695
						SIT1	1.0422	0.831
						AVT2	1.0189	0.93394
						CAN1	1.1485	0.63436
						NPR2	0.7571	0.55076
						CIN8	0.83769	0.56949
						PRB1	1.1367	0.56944
						SOM1	0.58266	0.16591
						HHY1	1.1037	0.59216
						PCM1	0.90474	0.91498
						YEL057C	0.96577	0.86344
						HAT2	1.2874	0.064373
						POL5	0.17803	0.24441
						RPL12A	0.6419	0.36465
						YEL053W-A	0.6618	0.4177
						MAK10	1.015	0.9274
						AFG1	0.82349	0.59935
						VMA8	5.1097	0.0029626
						YEL050W-A	1.5648	0.40305
						RML2	0.12395	0.048276
						PAU2	1.2298	0.42535
						TCA17	1.6243	0.30992
						FRD1	1.1861	0.34073
						GLY1	1.7434	0.57859
						YEL045C	1.0331	0.88944
						IES6	0.82419	0.79613
						YEL043W	1.1321	0.061908
						GDA1	0.99975	0.99917
						YEF1	1.2444	0.30653
						UTR2	0.84171	0.24544
						CYC7	0.87712	0.74948
						UTR4	1.1494	0.071765
						RAD23	0.69413	0.25102
						ANP1	1.014	0.95675
						UTR5	0.9873	0.91299
						YEL034C-A	0.84218	0.61975
						HYP2	0.4196	0.14734
						MTC7	0.88227	0.46866
						MCM3	0.61089	0.51847
						YEL032C-A	0	0.54518
						SPF1	0.52117	0.2601
						YEL030C-A	1.4602	0.25595
						ECM10	0.88246	0.46422
						BUD16	1.1272	0.47399
						YEL028W	1.2851	0.36662
						VMA3	1.0812	0.95628
						SNU13	0	0.40302
						YEL025C	1.1569	0.15767
						RIP1	0.080026	0.030733
						YEL023C	1.0725	0.52346
						GEA2	1.0351	0.7681
						URA3	0.98338	0.95016
						YEL020C-B	NaN	NaN
						TIM9	1.0268	0.95989
						YEL020C	0.92358	0.35069
						MMS21	1.135	0.66
						YEL018C-A	1.0672	0.84633
						EAF5	0.70531	0.51023
						PMP2	1.0598	0.85882
						GTT3	0.79394	0.40385
						NPP2	1.1286	0.3399
						EDC3	0.81364	0.17032
						YEL014C	1.0032	0.96504
						VAC8	0.87257	0.26558
						UBC8	0.99539	0.9481
						GLC3	0.99386	0.96205
						YEL010W	1.0013	0.99595
						YEL009C-A	1.0559	0.78238
						GCN4	0.95916	0.84101
						YEL008W	0.97758	0.93133
						YEL008C-A	0.8349	0.63766
						MIT1	0.88364	0.59935
						YEA6	1.0424	0.82613
						VAB2	0.96762	0.85638
						YEA4	1.0508	0.6034
						GIM4	0.94865	0.70956
						WBP1	0.70618	0.12567
						IRC22	1.0002	0.99877
						MNN1	0.96642	0.80299
						NOP16	0.94948	0.90692
						PMI40	0.91712	0.87865
						FMP52	1.0299	0.83978
						YND1	0.97548	0.85048
						NUG1	1.0102	0.96792
						YER006C-A	1.0078	0.96623
						PAC2	0.93187	0.74718
						TMA20	1.2661	0.19766
						SEC3	0.94677	0.64646
						NTF2	NaN	NaN
						YER010C	1.0405	0.83791
						TIR1	0.84944	0.3848
						PRE1	0.57126	0.047349
						PRP22	0.95084	0.78299
						HEM14	0.26627	0.31735
						BUD25	0.95203	0.72099
						FAA2	0.95593	0.46588
						BIM1	0.90059	0.3791
						AFG3	0.052172	0.0060848
						SPC25	1.0764	0.81917
						ISC1	1.0234	0.93026
						SBH2	1.26	0.5147
						GPA2	0.8273	0.04064
						RPN3	0.62004	0.23687
						SRB4	0.39767	0.11658
						PRO3	0.42541	0.34778
						YER023C-A	NaN	NaN
						YAT2	1.0432	0.68207
						GCD11	1.0483	0.9495
						CHO1	1.4419	0.65886
						GAL83	0.98857	0.91742
						MIG3	0.98922	0.93718
						SMB1	1.2702	0.035054
						CHZ1	0.91856	0.89469
						YPT31	1.0312	0.87256
						FIR1	0.96489	0.78413
						ZRG8	1.0601	0.60885
						YER034W	1.0423	0.79612
						EDC2	1.0355	0.85346
						ARB1	0.39769	0.44532
						PHM8	1.0252	0.8575
						KRE29	0.2945	0.28191
						YER038W-A	0.74403	0.53657
						HVG1	0.83682	0.43305
						YER039C-A	1.1238	0.68445
						GLN3	1.1888	0.16935
						YEN1	0.86675	0.17859
						MXR1	0.88047	0.71961
						SAH1	4.3276	0.24587
						ERG28	2.5133	0.043281
						MEI4	0.80381	0.35532
						ACA1	1.1263	0.47579
						SPO73	0.85839	0.60529
						YER046W-A	0.97665	0.94885
						SAP1	1.254	0.29213
						CAJ1	0.93428	0.52333
						ISD11	0.58179	0.50636
						TPA1	1.0556	0.85407
						RSM18	0.17202	0.40533
						JHD1	1.1163	0.54244
						HOM3	0.93414	0.81729
						PIC2	1.4039	0.022634
						YER053C-A	0.65057	0.77986
						GIP2	0.89699	0.48422
						HIS1	1.0464	0.82662
						FCY2	1.3494	0.018597
						RPL34A	1.2928	0.53483
						HMF1	0.98693	0.9429
						PET117	0.52943	0.22827
						PCL6	1.0113	0.97269
						FCY21	1.1564	0.21274
						FCY22	1.0502	0.80943
						CEM1	1.1254	0.30851
						GPP2	0.97388	0.75011
						THO1	1.0864	0.72443
						VHR2	0.54895	0.0095377
						ICL1	0.96391	0.8043
						RRT13	0.47909	0.2695
						YER066C-A	0.80389	0.70919
						RGI1	1.1041	0.78559
						YER067C-A	1.0464	0.9071
						MOT2	1.4537	0.06327
						YER068C-A	0.80566	0.27763
						ARG5%2C6	0.53194	0.28748
						RNR1	0.68914	0.44806
						TDA2	1.203	0.72138
						VTC1	0.82055	0.6066
						ALD5	1.1222	0.50077
						RPS24A	0.61856	0.72532
						YOS1	0	0.704
						PTP3	1.1412	0.50919
						YER076C	0.86584	0.35562
						YER076W-A	0.97948	0.95895
						YER077C	0.54226	0.048207
						ICP55	1.0518	0.66826
						YER078W-A	0.93256	0.7871
						YER079W	0.98	0.95348
						YER079C-A	1.2201	0.49185
						AIM9	1.2255	0.36671
						SER3	1.2276	0.096266
						UTP7	1.9771	0.18585
						GET2	0.59535	0.44033
						YER084W	0.83171	0.34865
						YER084W-A	1.3436	0.31109
						YER085C	1.3436	0.31109
						ILV1	1.0578	0.93697
						AIM10	0.038169	0.14048
						YER087C-A	0.20576	0.12806
						SBH1	1.1452	0.69434
						DOT6	1.2029	0.25088
						YER088C-A	0.93811	0.57037
						YER088W-B	1.0003	0.99831
						PTC2	1.0601	0.68961
						TRP2	0.91001	0.6656
						YER090C-A	0.85242	0.83206
						MET6	0.094812	0.014096
						YER091C-A	0.84656	0.12828
						IES5	0.66705	0.14872
						TSC11	1.0345	0.89073
						AIM11	1.2657	0.32961
						PUP3	Inf	0
						RAD51	1.1561	0.74668
						SHC1	1.196	0.48305
						YER097W	0.94062	0.71689
						UBP9	0.80527	0.31003
						PRS2	1.3435	0.11145
						UBC6	1.5573	0.018254
						AST2	1.2937	0.19026
						RPS8B	0.7651	0.44589
						SSA4	1.1152	0.71999
						RTT105	0.89436	0.87098
						NUP157	0.97978	0.92749
						MAM1	0.98903	0.91841
						GLE2	1.6516	0.69913
						YER107W-A	0.41213	0.31753
						FLO8	1.418	0.12265
						KAP123	1.5798	0.014178
						SWI4	0.94405	0.8407
						LSM4	0	0.23054
						TMN3	1.3138	0.031478
						BOI2	1.1353	0.58902
						SPR6	0.73215	0.47433
						SLX8	0.95957	0.65396
						RPL23B	0.72718	0.77745
						SHO1	1.426	0.22021
						AVT6	0.88851	0.69265
						YER119C-A	0.6081	0.090837
						SCS2	0.51133	0.05251
						YER121W	1.1517	0.61883
						GLO3	1.0267	0.90297
						YCK3	1.2249	0.54133
						DSE1	1.2454	0.084659
						RSP5	0	0.59062
						NSA2	0	0.40276
						LCP5	2.0051	0.33565
						VFA1	1.0388	0.93459
						SAK1	1.1793	0.33357
						COM2	0.88507	0.24919
						RPS26B	0.85534	0.64302
						PMD1	1.0167	0.90374
						GLC7	0	0.06751
						YER133W-A	0.88672	0.83007
						YER134C	1.3919	0.10727
						YER135C	0.79154	0.64935
						GDI1	0.91483	0.94194
						YER137C	1.3035	0.31724
						YER137W-A	0.52397	0.16559
						YER138W-A	1.8505	0.53987
						RTR1	1.1265	0.73284
						EMP65	1.1262	0.64275
						COX15	0.20501	0.022146
						MAG1	0.671	0.38258
						DDI1	1.0303	0.86869
						UBP5	0.98914	0.91211
						FTR1	0.82385	0.73586
						YER145C-A	0.75178	0.35872
						LSM5	0.74256	0.56032
						SCC4	1.1869	0.63817
						YER147C-A	1.5627	0.53987
						SPT15	1.3452	0.7621
						YER148W-A	1.7383	0.17913
						PEA2	1.5528	0.018997
						SPI1	2.0323	0.0023763
						UBP3	0.42726	0.099917
						YER152C	1.0137	0.95777
						YER152W-A	0.98997	0.98226
						PET122	0.42358	0.020064
						OXA1	0.14927	0.056123
						BEM2	1.9573	0.019454
						YER156C	0.85956	0.70002
						COG3	1.1636	0.70908
						YER158C	1.0525	0.6373
						YER158W-A	0.70542	0.37591
						BUR6	0.51196	0.35951
						SPT2	0.64339	0.068746
						RAD4	0.73844	0.46586
						GCG1	1.5814	0.034461
						CHD1	1.2509	0.27814
						PAB1	1.6222	0.60703
						YER165C-A	1.1426	0.82544
						DNF1	0.99278	0.97248
						BCK2	0.7006	0.36285
						CCA1	0.74683	0.77811
						RPH1	0.94385	0.87242
						ADK2	0.93622	0.84772
						RAD3	1.3768	0.50396
						BRR2	0.48523	0.2231
						YER172C-A	2.6805	0.092836
						RAD24	1.3471	0.42419
						GRX4	1.017	0.93648
						TMT1	1.025	0.91671
						YER175W-A	1.7707	0.20362
						ECM32	1.0782	0.53493
						BMH1	0.767	0.57341
						PDA1	1.6798	0.047783
						DMC1	0.93885	0.85041
						ISC10	0.99763	0.9936
						SLO1	2.265	0.0059754
						YER181C	1.0279	0.96819
						FMP10	0.91629	0.81265
						FAU1	1.3296	0.23452
						TOG1	0.96943	0.68357
						PUG1	0.89617	0.73981
						YER186C	1.302	0.12104
						YER187W	1.2634	0.19257
						YER188W	1.2317	0.36935
						YER188C-A	1.1044	0.75361
						YER189W	1.8624	0.63542
						YRF1-2	0.97441	0.91865
						YER190C-A	NaN	NaN
						YER190C-B	NaN	NaN
						YFL068W	NaN	NaN
						YFL067W	0.97122	0.98094
						YFL066C	0.46133	0.54926
						YFL065C	0	0.59062
						YFL064C	3.2443	0.00097607
						YFL063W	1.1214	0.60477
						COS4	1.3375	0.3624
						DDI2	2.2784	0.14932
						SNO3	1.9609	0.0099037
						SNZ3	1.1593	0.6754
						THI5	0.51534	0.33465
						AAD16	1.004	0.97993
						AAD6	1.192	0.43528
						AGP3	1.0328	0.78655
						YFL054C	1.2046	0.090081
						DAK2	0.98328	0.93865
						YFL052W	1.3728	0.017891
						YFL051C	1.1063	0.71817
						ALR2	1.0506	0.80496
						SWP82	0.82713	0.46896
						EMP47	1.2826	0.2972
						RGD2	1.0746	0.71278
						FMP32	0.70187	0.2632
						SEC53	0	0.56435
						OTU1	0.88612	0.6244
						YFL042C	0.99914	0.99403
						YFL041W-A	0.51553	0.14213
						FET5	1.2434	0.12057
						YFL040W	1.0779	0.55393
						ACT1	0	0.704
						YPT1	2.8593	0.28462
						TUB2	1.2154	0.83939
						RPO41	0.10274	0.073992
						MOB2	1.1504	0.62542
						RPL22B	1.142	0.38342
						YFL034W	0.93447	0.60574
						RIM15	1.2925	0.45099
						YFL032W	0.98597	0.95026
						HAC1	0.81831	0.2879
						YFL031C-A	0.77801	0.80195
						AGX1	0.87228	0.38939
						CAK1	12.3043	0.0099187
						CAF16	1.0381	0.86005
						GYP8	1.0169	0.89697
						STE2	1.0073	0.89162
						BST1	0.90118	0.2381
						EPL1	0.8262	0.54418
						BUD27	0.96513	0.81424
						FRS2	1.381	0.84616
						YFL021C-A	0.92499	0.52508
						GAT1	0.828	0.1865
						PAU5	0.66311	0.46267
						YFL019C	0.61918	0.57589
						LPD1	0.97294	0.83594
						SMX2	0	0.22567
						GNA1	2.1301	0.066728
						MDJ1	0.46268	0.074917
						YFL015W-A	1.208	0.52258
						YFL015C	0.93592	0.77077
						HSP12	0.58604	0.11824
						YFL013W-A	1.2849	0.11634
						IES1	1.1843	0.20092
						YFL012W-A	1.0702	0.8139
						YFL012W	1.0124	0.89172
						HXT10	0.88466	0.53362
						AUA1	1.1628	0.28172
						WWM1	0.99289	0.9652
						CDC4	1.3776	0.22419
						SMC1	0.72097	0.77871
						BLM10	0.81898	0.14874
						SEC4	0	0.54495
						VTC2	0.99015	0.95498
						MSH4	0.9633	0.8035
						SPB4	1.0997	0.73645
						DEG1	1.1142	0.38985
						LOC1	0.78847	0.59805
						NIC96	0.92349	0.43368
						YPI1	0.53439	0.35538
						RPN11	0.69195	0.37453
						SAD1	1.2126	0.5966
						YFR006W	0.9029	0.59547
						YFH7	0.92535	0.76603
						FAR7	0.98297	0.97259
[truncated: 4,576 more rows]
[truncated: 2 more columns]

## Sheet: Psd2delDpl1del vs. rest
positively selected						gene	fold_change	student_ttest
gene	fold_change	student_ttest				YAL069W	1.0467	0.78342
ECM8	1.8728	0.00076296				YAL068W-A	1.1028	0.84881
CDC10	2.4749	0.0024205				PAU8	1.2972	0.65544
SLG1	2.2602	0.013361				YAL067W-A	1.4833	0.11217
negatively selected						SEO1	0.98939	0.91345
gene	fold_change	student_ttest				YAL066W	1.1581	0.6858
VPS8	0.54383	0.009482				YAL065C	0.97761	0.85946
SLA1	0.47703	0.074632				YAL064W-B	0.43937	0.13787
STP22	0.5666	0.0068707				TDA8	0.66489	0.07746
SWF1	0.2416	0.0086777				YAL064W	0.57624	0.30131
DPL1	0.04599	0.14687				YAL063C-A	0.93074	0.88672
SWA2	0.20411	0.029388				FLO9	1.0935	0.63598
SPF1	0.40675	0.080978				GDH3	0.99216	0.95585
RIM15	0.44958	0.018472				BDH2	0.9617	0.76682
UBP6	0.21772	0.17591				BDH1	1.074	0.45841
MMS2	0.31468	0.052884				YAL059C-A	1.0388	0.84008
ERG4	0.29592	0.14722				ECM1	0.9102	0.62391
PSD2	0.010194	0.00058121				CNE1	0.83843	0.32682
PFK1	0.21927	0.029217				YAL056C-A	0.84061	0.36029
GPP1	0	0.0038977				GPB2	0.91196	0.66847
VPS1	0.1415	0.22405				PEX22	0.86303	0.59875
SIR1	0.46582	0.0070205				ACS1	1.2101	0.14805
VPS13	0.49116	0.38007				FLC2	1.1225	0.4174
PSD1	0	0.04948				OAF1	1.1014	0.23854
IRA2	0.35595	0.007913				AIM2	1.1314	0.48728
TLG2	0.38111	0.19868				GEM1	1.0002	0.99846
SNF8	0.30959	0.13336				YAL047W-A	0.73742	0.32733
						SPC72	1.1066	0.70084
						AIM1	1.3295	0.22358
						YAL045C	1.2088	0.35289
						YAL044W-A	1.0717	0.83239
						GCV3	0.80591	0.11546
						PTA1	0.92251	0.83871
						YAL042C-A	1.0514	0.77016
						ERV46	1.0363	0.76863
						CDC24	1.0224	0.94458
						CLN3	0.84135	0.48979
						CYC3	1.1801	0.6843
						CDC19	0.84742	0.81972
						YAL037C-B	0.39371	0.30645
						YAL037C-A	1.0066	0.97817
						YAL037W	1.1803	0.088578
						RBG1	0.85725	0.29367
						FUN12	0.40328	0.1739
						YAL034C-B	1.171	0.41051
						MTW1	0.9957	0.97532
						FUN19	1.0082	0.91927
						POP5	0.99512	0.99095
						PRP45	1.0405	0.85019
						YAL031W-A	0.76484	0.33108
						GIP4	1.0612	0.63413
						SNC1	1.5481	0.049097
						MYO4	1.0888	0.36618
						FRT2	1.079	0.44139
						SAW1	1.1149	0.57802
						YAL026C-A	0.83722	0.6451
						DRS2	0.72516	0.45558
						MAK16	1.8335	0.32697
						LTE1	1.1907	0.6085
						PMT2	0.8791	0.49204
						FUN26	1.1381	0.15877
						CCR4	0.84294	0.56111
						ATS1	1.0297	0.88824
						YAL019W-A	1.1143	0.33446
						FUN30	1.0929	0.4795
						LDS1	0.97556	0.91535
						PSK1	1.014	0.79117
						YAL016C-B	1.1633	0.58249
						YAL016C-A	1.0615	0.78072
						TPD3	0.68447	0.59485
						NTG1	0.89843	0.52265
						SYN8	0.77907	0.20947
						DEP1	1.1717	0.16348
						CYS3	0.067612	0.2229
						SWC3	0.78698	0.27345
						MDM10	0.19544	0.54235
						SPO7	0.96966	0.88223
						FUN14	1.3162	0.025975
						ERP2	1.0298	0.49487
						SSA1	0.89352	0.42441
						YAL004W	1.0048	0.98584
						EFB1	1.114	0.9405
						VPS8	0.54383	0.009482
						TFC3	0.84183	0.40484
						NUP60	0.80733	0.34104
						ERP1	0.85825	0.45938
						SWD1	0.64912	0.22792
						RFA1	0.95064	0.87181
						SEN34	0.82934	0.66777
						BUD14	0.9183	0.09623
						ADE1	1.1651	0.8954
						KIN3	1.0097	0.96142
						CDC15	1.1864	0.79103
						YAR019W-A	0.99492	0.97344
						PAU7	0.98426	0.95797
						YAR023C	0.90697	0.39176
						UIP3	0.7149	0.21945
						YAR028W	1.0181	0.95641
						YAR029W	0.79827	0.70738
						YAR030C	0.95115	0.8371
						PRM9	0.95427	0.85555
						MST28	0.97742	0.91065
						YAT1	0.97466	0.7747
						YAR035C-A	0.87426	0.67417
						SWH1	0.86735	0.30222
						YAR047C	0.34233	0.24487
						FLO1	0.97711	0.83813
						YAR053W	1.4564	0.23326
						YAR060C	NaN	NaN
						YAR064W	1.062	0.77894
						YAR066W	0	0.31359
						YAR068W	0.65376	0.65112
						YAR069C	NaN	NaN
						YAR070C	0.76455	0.73432
						PHO11	1.9932	0.16161
						IMD1	0.5608	0.30221
						YAR075W	1.1399	0.70677
						YBL113C	0.75827	0.41197
						YBL113W-A	0	0.36004
						YBL112C	NaN	NaN
						YBL111C	3.7842	0.069143
						YBL109W	0.95727	0.89972
						PAU9	0	0.72097
						YBL108W	1.3005	0.3218
						YBL107W-A	1.1304	0.93541
						MIX23	1.0674	0.75871
						SRO77	0.97828	0.90042
						PKC1	0.86647	0.85262
						SEA4	0.74341	0.24818
						RTG3	1.1321	0.71081
						SFT2	1.4237	0.34683
						ECM21	0.88137	0.32732
						YBL100W-C	0.67579	0.46482
						YBL100C	0.40711	0.55516
						ATP1	0	0.3546
						BNA4	1.2702	0.3205
						BRN1	1.1507	0.47566
						YBL096C	0.61651	0.21059
						YBL095W	0.70104	0.12943
						YBL094C	0.83002	0.66296
						ROX3	0.86578	0.70053
						RPL32	0	0.72097
						SCS22	1.2286	0.60077
						MAP2	1.0927	0.74215
						MRP21	1.1929	0.73949
						AVT5	1.2356	0.098442
						TEL1	1.0965	0.6199
						RPL23A	0.98534	0.93067
						YBL086C	1.2192	0.38883
						BOI1	0.97464	0.81882
						CDC27	0.81923	0.42601
						YBL083C	1.4469	0.25634
						ALG3	1.144	0.53548
						YBL081W	1.0123	0.96063
						PET112	1.0186	0.98018
						NUP170	1.1844	0.58199
						ATG8	1.4041	0.59993
						YBL077W	0.79877	0.33826
						ILS1	2.0195	0.57674
						SSA3	1.0107	0.93382
						AAR2	0.90166	0.66819
						YBL073W	0.99487	0.9811
						RPS8A	1.0216	0.9664
						YBL071C-B	1.5432	0.20172
						KTI11	0.42594	0.354
						YBL071C	1.4979	0.054547
						YBL070C	1.543	0.26931
						AST1	1.4684	0.048312
						YBL068W-A	1.6944	0.46898
						PRS4	0.54086	0.0034416
						UBP13	1.0481	0.67527
						SEF1	0.93431	0.78532
						YBL065W	0.84065	0.69053
						PRX1	1.0097	0.97512
						KIP1	0.89096	0.30585
						YBL062W	0.879	0.80366
						SKT5	1.0469	0.85009
						YEL1	0.91526	0.56536
						CMC2	2.053	0.23952
						YBL059W	1.1499	0.67228
						SHP1	0.84041	0.70285
						PTH2	1.2432	0.25243
						PTC3	1.4699	0.11792
						YBL055C	0.93278	0.7236
						TOD6	0.90663	0.66872
						YBL053W	1.0141	0.96556
						SAS3	1.0821	0.47714
						PIN4	1.701	0.03002
						SEC17	0	0.59046
						MOH1	1.1568	0.68559
						RRT1	0.64111	0.25125
						EDE1	0.67944	0.052196
						PSY4	1	1
						COR1	1.5062	0.33428
						YBL044W	0.92582	0.31979
						ECM13	0.7366	0.28386
						FUI1	1.1482	0.44492
						PRE7	0	0.57905
						ERD2	1.0779	0.77606
						YBL039W-B	2.4523	0.01379
						URA7	0.95691	0.51751
						YBL039C-A	0	0.17889
						MRPL16	0.98428	0.97732
						APL3	1.1841	0.12309
						YBL036C	1.1214	0.41531
						POL12	1.139	0.71546
						STU1	1.2895	0.298
						RIB1	1.0534	0.89831
						HEK2	1.436	0.19189
						SHE1	1.7294	0.0033561
						PET9	0.85478	0.83526
						YBL029C-A	1.36	0.14522
						YBL029W	1.2745	0.11969
						YBL028C	1.4805	0.11616
						RPL19B	0.77202	0.63226
						LSM2	1.0818	0.93928
						RRN10	0.51275	0.32855
						NCL1	0.94421	0.64029
						MCM2	1.3084	0.22029
						PIM1	1.279	0.62476
						HAP3	1.0638	0.59225
						RFT1	1.4742	0.22707
						APN2	1.0138	0.88475
						POP8	1.2781	0.23962
						PEP1	0.80356	0.02087
						FUS3	1.1446	0.34244
						ACH1	0.88716	0.59776
						RRN6	1.0701	0.56961
						FMT1	1.0545	0.80823
						YBL012C	1.3538	0.087395
						SCT1	1.1545	0.21624
						YBL010C	0.92491	0.5829
						ALK2	0.93452	0.4375
						YBL008W-A	1.149	0.49778
						HIR1	0.84414	0.037839
						SLA1	0.47703	0.074632
						LDB7	1.1343	0.6423
						YBL006W-A	1.09	0.7672
						PDR3	0.91565	0.54102
						UTP20	0.73399	0.50651
						HTA2	1.1213	0.63474
						HTB2	1.0052	0.97641
						ECM15	0.91974	0.77577
						NTH2	0.87515	0.50788
						RER2	0.72697	0.45529
						COQ1	1.2739	0.62403
						GPI18	1.2313	0.8184
						RCR1	0.92278	0.64295
						UGA2	0.884	0.47978
						DSF2	0.97118	0.83106
						FLR1	0.98156	0.85492
						HHF1	0.93286	0.88545
						HHT1	1.1401	0.4681
						IPP1	0.50599	0.12669
						YBR012C	1.0433	0.85509
						YBR013C	0.93728	0.69385
						GRX7	1.1641	0.52047
						MNN2	0.95587	0.67062
						YBR016W	1.0507	0.78175
						KAP104	0.99814	0.99465
						GAL7	0.59383	0.73566
						GAL10	0.48707	0.075411
						GAL1	1.3442	0.49895
						FUR4	1.0506	0.83033
						POA1	0.92178	0.65976
						CHS3	0.86545	0.54003
						SCO2	1.2937	0.074734
						OLA1	0.8531	0.62715
						ETR1	1.1033	0.46715
						YBR027C	0.90045	0.64311
						YPK3	0.99922	0.99674
						CDS1	0.69005	0.61543
						RKM3	1.1238	0.559
						RPL4A	0.99333	0.98962
						YBR032W	0.97718	0.93665
						EDS1	1.2719	0.10028
						HMT1	1.1581	0.58004
						PDX3	0.50868	0.34676
						CSG2	0.14708	0.32029
						SCO1	1.2622	0.65496
						CHS2	1.2198	0.7194
						ATP3	1.3112	0.78831
						FIG1	1.4176	0.20109
						FAT1	1.2378	0.12636
						CST26	1.1371	0.33851
						QDR3	1.1344	0.42317
						TCM62	0.99504	0.97061
						GIP1	0.89083	0.51112
						ZTA1	0.78146	0.25234
						FMP23	1.1104	0.28913
						RPS11B	1.2287	0.51595
						REB1	0.21246	0.20684
						REG2	1.0205	0.883
						YBR051W	1.1602	0.61265
						RFS1	1.2953	0.24975
						YBR053C	0.90147	0.43382
						YRO2	0.89743	0.60315
						PRP6	0.92517	0.7985
						YBR056W	1.3819	0.047497
						YBR056W-A	0.94124	0.88975
						YBR056C-B	0.85744	0.72092
						MUM2	1.0577	0.84997
						UBP14	0.67599	0.14898
						TSC3	1.7698	0.34412
						AKL1	0.99115	0.947
						ORC2	0.59369	0.15511
						TRM7	0.76751	0.47192
						YBR062C	1.425	0.26419
						YBR063C	1.0008	0.99636
						YBR064W	1.5321	0.015641
						ECM2	1.0473	0.61893
						NRG2	0.80676	0.5944
						TIP1	1.4311	0.21081
						BAP2	0.77451	0.71485
						TAT1	0.55403	0.40425
						ALG14	0	0.72097
						YBR071W	1.266	0.27466
						HSP26	1.2883	0.42206
						YBR072C-A	0.94421	0.78873
						RDH54	1.0433	0.83678
						PFF1	1.0784	0.53165
						ECM8	1.8728	0.00076296
						YBR076C-A	1.0333	0.90622
						SLM4	1.2692	0.29593
						ECM33	1.0726	0.71214
						RPG1	0.68293	0.28483
						SEC18	0.84756	0.84741
						SPT7	1.2978	0.40721
						UBC4	0.58646	0.28369
						TEC1	0.99398	0.97758
						MIS1	1.1805	0.020474
						RPL19A	0.61794	0.044259
						AAC3	1.7156	0.082966
						YBR085C-A	1.0017	0.99557
						IST2	1.4466	0.045375
						RFC5	0	0.46752
						POL30	1.5073	0.78202
						YBR089W	0	0.72097
						NHP6B	1.0521	0.78817
						YBR090C	1.2176	0.46876
						TIM12	NaN	NaN
						PHO3	1.1809	0.3133
						PHO5	0.9902	0.97102
						PBY1	0.99042	0.94531
						RXT2	1.1267	0.73522
						YBR096W	0.9497	0.71966
						VPS15	0.64515	0.061163
						MMS4	1.072	0.7029
						YBR099C	1.2465	0.48399
						FES1	0.986	0.96714
						EXO84	1.0805	0.80125
						SIF2	0.82795	0.56666
						YBR103C-A	0.82007	0.27796
						YMC2	0.94017	0.68079
						VID24	1.0998	0.6775
						PHO88	1.055	0.8531
						IML3	1.0148	0.97518
						AIM3	0.9521	0.72765
						CMD1	5.6159	0.1415
						YBR109W-A	0.76617	0.6291
						ALG1	1.986	0.5135
						YSA1	1.0307	0.92279
						SUS1	0.5054	0.44394
						CYC8	0.94962	0.87669
						YBR113W	0.91018	0.86532
						RAD16	0.92246	0.58691
						LYS2	0.40631	0.43413
						YBR116C	1.3087	0.18258
						TKL2	0.95762	0.78616
						TEF2	0	0.20302
						MUD1	1.7422	0.09868
						CBP6	1.102	0.85093
						GRS1	0	0.72097
						YBR121C-A	NaN	NaN
						MRPL36	0.5685	0.23152
						TFC1	1.7368	0.37643
						YBR124W	0.88434	0.42052
						PTC4	0.83769	0.31498
						TPS1	0.36075	0.27991
						YBR126W-A	1.1043	0.71464
						YBR126W-B	0.74884	0.31102
						VMA2	0.94342	0.86055
						ATG14	1.065	0.86269
						OPY1	0.91275	0.79046
						SHE3	0.60109	0.21986
						CCZ1	1.2427	0.74845
						YBR131C-A	0	0.72097
						AGP2	0.84407	0.50791
						HSL7	0.92328	0.74762
						YBR134W	0.71871	0.17014
						CKS1	0.56704	0.5113
						MEC1	0.49711	0.31858
						YBR137W	0.98254	0.94152
						YBR138C	1.0704	0.69106
						YBR139W	1.0073	0.98624
						IRA1	0.64447	0.10842
						BMT2	0.71824	0.22192
						YBR141W-A	0.95758	0.94639
						MAK5	0.74082	0.71634
						SUP45	0	0.72097
						YBR144C	1.404	0.19435
						ADH5	1.0861	0.57778
						MRPS9	0.96902	0.97019
						RTC2	1.1108	0.73899
						YSW1	0.81711	0.37464
						ARA1	0.68553	0.18358
						TBS1	0.94555	0.86842
						APD1	1.1088	0.56171
						SPP381	1.2217	0.49453
						RIB7	0.97692	0.98569
						RPB5	0	0.57737
						CNS1	0.71456	0.71559
						SLI15	1.7194	0.28479
						ICS2	1.3164	0.085615
						AMN1	0.86749	0.49427
						IFA38	1.1478	0.90181
						CDC28	0	0.44054
						CSH1	1.0558	0.88062
						TOS1	1.4513	0.082402
						YSY6	0.84852	0.85884
						EXO5	1.0282	0.96589
						ARL1	1.0357	0.94748
						UBS1	0.67972	0.43714
						TYR1	0.13327	0.11214
						POP7	0	0.72097
						PEX32	0.83972	0.5612
						SSE2	1.0732	0.75419
						NPL4	1.1231	0.67424
						SEC66	0.38178	0.073455
						SMY2	0.7214	0.28633
						UMP1	0.22568	0.2743
						YBR174C	1.3165	0.208
						SWD3	0.85488	0.79506
						ECM31	1.0727	0.71015
						EHT1	0.95216	0.84378
						YBR178W	1.164	0.42662
						FZO1	1.2161	0.76349
						DTR1	1.2169	0.393
						RPS6B	0.35507	0.058059
						SMP1	1.3586	0.083956
						YBR182C-A	0.84102	0.72219
						YPC1	1.3801	0.4725
						YBR184W	1.2423	0.24745
						MBA1	1.0647	0.87146
						PCH2	1.2778	0.10596
						GDT1	1.1724	0.69282
						NTC20	1.1131	0.61199
						RPS9B	1.23	0.70652
						YBR190W	0.87085	0.75115
						RPL21A	0.28663	0.47879
						YBR191W-A	2.6908	0.41712
						RIM2	0.4049	0.4908
						MED8	3.6693	0.011275
						AIM4	1.2964	0.47924
						MSI1	0.79981	0.52172
						PGI1	0	0.72097
						YBR196C-A	1.0496	0.7889
						YBR196C-B	1.5444	0.10827
						YBR197C	0.89127	0.68076
						TAF5	0	0.46527
						KTR4	0.95141	0.84721
						BEM1	0.9983	0.99743
						YBR200W-A	0.72003	0.76596
						DER1	0.72951	0.56067
						YBR201C-A	0.52852	0.21322
						MCM7	1.5129	0.33228
						COS111	1.1738	0.60878
						LDH1	1.2824	0.15166
						KTR3	1.3006	0.17241
						YBR206W	1.2125	0.37714
						FTH1	1.2148	0.30614
						DUR1%2C2	0.9299	0.77243
						YBR209W	1.0854	0.20985
						ERV15	0.91899	0.8088
						AME1	0.82972	0.54478
						NGR1	0.98575	0.92584
						MET8	1.0049	0.98496
						SDS24	0.79595	0.25685
						HPC2	0.71039	0.43353
						YBP1	0.97202	0.91638
						ATG12	1.0758	0.77666
						PYC2	1.0255	0.70559
						YBR219C	1.1055	0.25875
						YBR220C	1.1241	0.39216
						PDB1	0.56535	0.026398
						YBR221W-A	1.2362	0.13416
						PCS60	0.99806	0.98773
						TDP1	1.0815	0.41338
						YBR223W-A	1.0161	0.96184
						YBR224W	0.92573	0.81297
						YBR225W	1.2071	0.50384
						YBR226C	1.3737	0.41109
						MCX1	1.0529	0.83305
						SLX1	1.2032	0.44196
						ROT2	0.6538	0.13478
						OM14	1.0779	0.88857
						YBR230W-A	0.71796	0.50272
						SWC5	0.80104	0.60319
						YBR232C	1.1359	0.59981
						PBP2	1.0728	0.71612
						DAD3	0	0.5772
						ARC40	0	0.72097
						VHC1	1.0836	0.71736
						ABD1	1.0562	0.95779
						PRP5	0.48579	0.63958
						YBR238C	1.2598	0.32264
						ERT1	1.0808	0.58814
						THI2	0.72618	0.3225
						YBR241C	0.98669	0.96475
						YBR242W	0.47283	0.024997
						ALG7	0	0.35693
						GPX2	1.4668	0.17193
						ISW1	0.70568	0.15893
						RRT2	0.9283	0.8392
						ENP1	0	0.20937
						HIS7	1.068	0.78795
						ARO4	1.2171	0.39362
						SPO23	1.0062	0.97712
						MRPS5	0.86274	0.81566
						DUT1	0.75184	0.8857
						SRB6	1.1355	0.82886
						TRS20	0	0.44968
						MTC4	1.3229	0.25812
						YBR255C-A	1.121	0.81193
						RIB5	1.2021	0.77244
						POP4	0	0.57614
						SHG1	0.88061	0.73595
						YBR259W	1.0523	0.58895
						RGD1	0.78557	0.35861
						TAE1	0.96848	0.86833
						MIC12	1.2118	0.66398
						SHM1	1.0452	0.76181
						YPT10	1.0964	0.67312
						TSC10	2.2837	0.057673
						REI1	0.81993	0.53944
						SLM6	1.1362	0.85697
						MRPL37	0.32339	0.45782
						FMP21	1.1701	0.71537
						BIT2	0.99905	0.99752
						EFM2	0.63185	0.21188
						HSM3	1.1637	0.46505
						UBX7	1.5533	0.18666
						CHK1	0.61783	0.1953
						RIF1	0.924	0.68797
						PPS1	0.91791	0.66806
						YBR277C	1.1585	0.6164
						DPB3	1.2599	0.48731
						PAF1	1.1088	0.66175
						SAF1	1.0141	0.96838
						DUG2	0.7674	0.1964
						MRPL27	0.97617	0.97669
						SSH1	0.86971	0.3543
						YBR284W	1.0045	0.96497
						YBR285W	0.45177	0.44975
						APE3	0.89803	0.69084
						YBR287W	0.95886	0.8107
						APM3	1.3047	0.28985
						SNF5	1.0891	0.70071
						BSD2	1.0798	0.76982
						CTP1	1.0991	0.39394
						YBR292C	1.2982	0.323
						VBA2	0.79213	0.31721
						SUL1	1.0578	0.64528
						PCA1	0.8774	0.58865
						PHO89	1.0102	0.96116
						YBR296C-A	1.8143	0.066774
						MAL33	0.96722	0.86251
						MAL31	0.83331	0.67821
						YBR298C-A	0.84599	0.63951
						MAL32	1.4349	0.23057
						YBR300C	1.1681	0.73777
						PAU24	1.5484	0.3714
						COS2	7.8582	0.0094956
						YCL076W	2.3292	0.10829
						GEX1	1.1352	0.77786
						VBA3	4.0196	0.00014988
						YCL068C	1.8625	0.42243
						HMLALPHA2	NaN	NaN
						HMLALPHA1	NaN	NaN
						YCL065W	Inf	0
						CHA1	0.49574	0.32833
						VAC17	0.97111	0.88456
						MRC1	0.88839	0.70804
						KRR1	1.1477	0.85592
						FYV5	1.0372	0.90559
						ADF1	0.57647	0.52442
						MIC10	1.5308	0.39023
						PRD1	0.66425	0.16109
						PEX34	0.85849	0.73862
						KAR4	0.81874	0.40633
						SPB1	0.54493	0.34834
						PBN1	1.0044	0.98537
						LRE1	0.94948	0.79266
						APA1	1.2942	0.252
						YCL049C	0.82311	0.28546
						YCL048W-A	1.1178	0.77415
						SPS22	0.98918	0.96837
						POF1	0.78784	0.17654
						EMC1	1.0523	0.85396
						YCL046W	1.2398	0.60538
						MGR1	1.2458	0.43281
						PDI1	1.8002	0.47739
						YCL041C	1.0836	0.73046
						YCL042W	0.7302	0.23107
						GLK1	0.96483	0.74149
						GID7	1.0386	0.84097
						ATG22	0.81323	0.10581
						SRO9	1.0343	0.82381
						GFD2	1.0998	0.59205
						GRX1	1.3083	0.39811
						LSB5	0.76214	0.12942
						MXR2	1.1845	0.54657
						STE50	1.1289	0.35034
						RRP7	0.93045	0.93164
						HIS4	0.74231	0.022069
						BIK1	1.1478	0.47913
						RNQ1	1.0785	0.53691
						FUS1	1.176	0.076667
						HBN1	1.2422	0.2597
						FRM2	1.0316	0.78344
						AGP1	1.1357	0.18184
						YCL023C	1.2773	0.083802
						KCC4	1.0417	0.69402
						YCL022C	1.0852	0.57837
						YCL021W-A	1.0765	0.47748
						LEU2	NaN	NaN
						NFS1	3.9364	0.0046182
						DCC1	0.89044	0.60811
						BUD3	0.98009	0.8566
						YCL012C	1.1772	0.43453
						GBP2	1.0922	0.5395
						SGF29	0.9137	0.77912
						ILV6	1.1335	0.35465
						STP22	0.5666	0.0068707
						YCL007C	1.1229	0.54993
						VMA9	0.98376	0.98021
						LDB16	1.0801	0.77057
						PGS1	0.61477	0.53162
						YCL002C	0.99948	0.99796
						RER1	0.82541	0.71896
						YCL001W-A	1.1407	0.80127
						YCL001W-B	0.89239	0.58358
						YCR001W	1.1514	0.39954
						CDC10	2.4749	0.0024205
						MRPL32	0.9814	0.95606
						YCP4	1.242	0.31248
						CIT2	0.89396	0.47614
						YCR006C	1.0958	0.73685
						YCR007C	1.0575	0.81806
						SAT4	1.2481	0.13631
						RVS161	0.57278	0.35348
						ADY2	1.3543	0.033832
						ADP1	0.92282	0.32651
						PGK1	1.1198	0.89322
						YCR013C	1.0628	0.84611
						POL4	0.99258	0.94291
						YCR015C	1.1769	0.34656
						YCR016W	1.0639	0.75616
						CWH43	0.88586	0.43019
						SRD1	0.66351	0.24121
						YCR018C-A	0.8963	0.66454
						MAK32	1.0941	0.50487
						PET18	0.93972	0.79347
						MAK31	0.72928	0.54409
						HTL1	1.2801	0.73735
						HSP30	0.94105	0.58006
						YCR022C	1.0659	0.62102
						YCR023C	1.0766	0.4045
						SLM5	1.0173	0.97853
						YCR024C-B	0.84025	0.56962
						PMP1	1.1014	0.72718
						YCR025C	1.016	0.92066
						NPP1	1.158	0.19823
						RHB1	1.3315	0.39726
						FEN2	0.71466	0.50156
						RIM1	2.1032	0.28467
						SYP1	1.0302	0.89112
						RPS14A	0.90572	0.80761
						BPH1	1.1667	0.33098
						SNT1	0.75228	0.36562
						ELO2	0.75633	0.58991
						RRP43	0	0.44618
						RBK1	0.88764	0.05503
						PHO87	0.9655	0.84662
						BUD5	1.0854	0.85001
						YCR038W-A	1.3401	0.3762
						MATALPHA2	1.6518	0.57267
						MATALPHA1	NaN	NaN
						YCR041W	2.5299	0.020916
						TAF2	0.80462	0.67248
						YCR043C	0.70312	0.27018
						PER1	0.71221	0.77536
						RRT12	1.1031	0.36492
						YCR045W-A	1.2317	0.43774
						IMG1	1.3585	0.49206
						BUD23	0.77313	0.50676
						YCR047W-A	0.3024	0.56186
						YCR049C	1.0664	0.71749
						ARE1	0.83955	0.23901
						YCR050C	1.0685	0.83548
						YCR051W	1.0411	0.88204
						RSC6	0.77452	0.60042
						THR4	1.0315	0.92567
						CTR86	0.57653	0.25195
						PWP2	1.0492	0.90737
						YIH1	1.2523	0.19333
						TAH1	0.71366	0.57397
						YCR061W	1.1774	0.16787
						YCR064C	0.87178	0.49821
						BUD31	0.84937	0.71671
						HCM1	0.95602	0.75404
						RAD18	0.8399	0.70763
						SED4	1.1201	0.40164
						ATG15	1.2364	0.13293
						CPR4	1.098	0.66687
						IMG2	1.2799	0.75061
						RSA4	NaN	NaN
						SSK22	0.9602	0.78378
						SOL2	1.0428	0.81393
						ERS1	1.2136	0.30646
						YCR075W-A	0.9668	0.95226
						FUB1	0.67853	0.27979
						PAT1	0.87748	0.76663
						PTC6	1.1262	0.55956
						SRB8	0.48721	0.54213
						YCR081C-A	0.67961	0.79783
						AHC2	0.62115	0.33115
						TRX3	1.024	0.92924
						TUP1	0.51997	0.44756
						YCR085W	1.16	0.63081
						CSM1	1.3197	0.42131
						YCR087W	0.53082	0.00076587
						YCR087C-A	0.60604	0.091548
						ABP1	1.0094	0.9409
						FIG2	0.9587	0.81984
						YCR090C	0.96373	0.90829
						KIN82	0.76337	0.15922
						MSH3	0.85785	0.54053
						CDC39	0.85262	0.73655
						CDC50	0.71103	0.69599
						OCA4	0.78356	0.59556
						YCR095W-A	0.22508	0.30149
						HMRA2	NaN	NaN
						HMRA1	1.7949	0.42524
						YCR097W-A	1.5094	0.4168
						GIT1	1.1847	0.49429
						YCR099C	1.8183	0.22228
						YCR100C	1.0995	0.76522
						YCR101C	1.1317	0.74098
						YCR102C	1.2124	0.51545
						YCR102W-A	2.9541	0.052945
						PAU3	1.1252	0.65234
						ADH7	0.7643	0.37421
						RDS1	1.0892	0.74447
						AAD3	1.0405	0.92161
						YCR108C	1.2294	0.45386
						COS7	0.73698	0.66152
						YDL247W-A	0	0.72097
						MPH2	0.29165	0.49726
						SOR2	0.69155	0.77204
						HXT15	1.068	0.92068
						THI13	0.39374	0.076915
						AAD4	1.0132	0.94921
						YDL242W	0.5708	0.060046
						YDL241W	0.90225	0.83895
						YDL240C-A	0.95815	0.77754
						LRG1	0.94225	0.64259
						ADY3	1.0385	0.74874
						GUD1	0.93179	0.79142
						AIM6	1.0011	0.9966
						PHO13	0.81709	0.63371
						YPD1	1.6866	0.19596
						GYP7	0.92292	0.58391
						MFG1	0.95068	0.84735
						OST4	0	0.72097
						BRE4	0.90697	0.32042
						PTP1	1.3276	0.26745
						SSB1	0.78248	0.37419
						YDL228C	1.1958	0.52342
						HO	1.0162	0.94441
						GCS1	1.1717	0.56925
						SHS1	1.6161	0.045221
						WHI4	0.56618	0.22563
						HBT1	0.89003	0.33412
						FMP45	0.74535	0.55652
						YDL221W	1.104	0.61335
						CDC13	1.0212	0.92159
						DTD1	1.7005	0.37664
						YDL218W	0.68219	0.074284
						TIM22	1.7431	0.45565
						RRI1	0.9927	0.97596
						GDH2	0.89892	0.3991
						PRR2	1.2423	0.17325
						NOP6	1.0266	0.95641
						SHR3	0.61334	0.62534
						YDL211C	0.92298	0.75685
						UGA4	0.94419	0.74732
						CWC2	1.7364	0.61029
						NHP2	0.71184	0.26116
						GLE1	1.0965	0.77333
						YDL206W	1.0406	0.90349
						HEM3	0	0.44377
						RTN2	1.1128	0.57147
						ACK1	1.0353	0.84523
						MRPL11	0.71862	0.65911
						TRM8	0.71538	0.032221
						MGT1	1.4037	0.21638
						YDL199C	0.75113	0.19432
						GGC1	0.54988	0.45542
						ASF2	1.2133	0.38378
						YDL196W	0.91997	0.21928
						SEC31	0.79811	0.84112
						SNF3	1.1094	0.58103
						NUS1	1.1235	0.8718
						ARF1	0.9825	0.96571
						RPL35A	0.92116	0.95798
						UFD2	1.5461	0.045977
						RBS1	1.3517	0.24385
						PPH22	1.1216	0.68285
						YDL187C	0.70535	0.39882
						YDL186W	0.76175	0.51021
						YDL185C-A	1.9312	0.17316
						VMA1	0.68881	0.52629
						RPL41A	0	0.72097
						YDL183C	0.98994	0.93612
						LYS20	1.374	0.13357
						INH1	1.3642	0.20892
						YDL180W	1.3714	0.079408
						PCL9	1.3548	0.36868
						DLD2	0.97376	0.89439
						YDL177C	0.82773	0.60805
						YDL176W	1.1172	0.29699
						AIR2	0.85654	0.31435
						DLD1	0.82079	0.1404
						PAR32	0.85021	0.61047
						YDL172C	0.82286	0.55677
						GLT1	1.0883	0.57814
						UGA3	1.0322	0.60359
						UGX2	0.92715	0.7867
						SFA1	1.0832	0.81248
						NRP1	0.90344	0.74604
						FAP7	0	0.19443
						CDC36	0.53539	0.49762
						CDC9	0.9315	0.87688
						YDL163W	0.90697	0.83045
						YDL162C	1.076	0.43977
						ENT1	1.0953	0.65922
						MHF2	0.90559	0.8537
						DHH1	0.89903	0.84498
						YDL159W-A	1.0023	0.99092
						STE7	0.85488	0.21124
						YDL159C-B	1.8724	0.1846
						YDL158C	0.33483	0.2175
						YDL157C	1.3635	0.45503
						CMR1	1.0639	0.75644
						CLB3	1.003	0.9896
						MSH5	0.87922	0.4702
						SAS10	0.68017	0.6371
						YDL152W	0.95477	0.87303
						BUD30	1.0242	0.97838
						RPC53	0.83927	0.85892
						ATG9	1.4588	0.15065
						NOP14	1.2128	0.29573
						RPN5	1.2206	0.8048
						LDB17	0.8444	0.65228
						COP1	0.30993	0.21183
						YDL144C	1.1787	0.46169
						CCT4	2.2942	0.48356
						CRD1	1.1766	0.53272
						BPL1	1.4628	0.623
						RPO21	1.4458	0.30314
						SCM3	1.4856	0.61858
						RGT2	0.82018	0.33984
						ARF2	0.96229	0.8445
						RPL35B	0.49283	0.19921
						RDI1	0.99393	0.98454
						PPH21	0.90255	0.54798
						RPL41B	1.893	0.49212
						SRF1	1.1159	0.63236
						CDC53	0.49028	0.31563
						LYS21	1.0214	0.91814
						STF1	0.99121	0.97943
						RPP1B	0.9493	0.85989
						YDL129W	0.925	0.71463
						VCX1	1.2695	0.37004
						PCL2	1.1488	0.57338
						CDC48	0.48921	0.4024
						HNT1	1.2289	0.17493
						YDL124W	1.099	0.58361
						SNA4	0.86584	0.64011
						UBP1	1.3151	0.32198
						YDL121C	1.181	0.63009
						YFH1	3.098	0.26867
						YDL119C	0.89591	0.68029
						YDL118W	1.3411	0.49709
						CYK3	1.1873	0.31367
						NUP84	0.58721	0.53515
						IWR1	1.5266	0.08515
						YDL114W-A	0	0.72097
						YDL114W	1.1609	0.45498
						ATG20	1.1752	0.44343
						TRM3	1.0506	0.45908
						RRP42	0.43424	0.13382
						TMA17	1.1445	0.68381
						YDL109C	0.81163	0.27787
						KIN28	0.84014	0.57564
						MSS2	1.3738	0.47457
						PHO2	0.91282	0.84274
						NSE4	0.8479	0.89504
						QRI7	1.1242	0.5722
						QRI1	1.4686	0.3876
						POL3	0.6232	0.32404
						DUN1	0.70056	0.27758
						GET3	1.106	0.76635
						BUG1	0.9522	0.82921
						SNU23	0.70201	0.33518
						RPN6	3.2101	0.05223
						OPI6	0.61538	0.097356
						PMT1	0.74621	0.21317
						YDL094C	0.91522	0.68471
						PMT5	0.97725	0.63458
						SRP14	0.67516	0.36887
						UBX3	1.1434	0.51313
						RAM1	1.1053	0.85828
						NUR1	1.0822	0.52557
						ASM4	1.0857	0.6925
						LUC7	1.0318	0.93432
						YDL086W	0.84612	0.37985
						YDL086C-A	0.64743	0.1018
						YDL085C-A	1.482	0.21236
						NDE2	0.9013	0.68631
						SUB2	0.80981	0.77575
						RPS16B	0.89797	0.75183
						RPL13A	0.86726	0.6155
						RPP1A	1.2175	0.69257
						THI3	0.80807	0.35136
						MRK1	1.0744	0.59095
						MDH3	1.2476	0.41602
						VAM6	0.90698	0.89033
						RXT3	0.75727	0.37312
						RPL31A	0.81977	0.86833
						BRE1	0.65705	0.50711
						YDL073W	1.0246	0.94136
						YET3	1.1754	0.64669
						YDL071C	1.1026	0.71356
						BDF2	0.88435	0.61386
						CBS1	1.6998	0.20168
						YDL068W	2.3912	0.059961
						COX9	0.91565	0.94622
						IDP1	0.7985	0.14144
						PEX19	1.0686	0.79997
						UBC9	5.6159	0.1415
						SYO1	0.67585	0.25672
						YDL062W	1.127	0.63187
						RPS29B	0.54239	0.44763
						TSR1	0	0.22759
						RAD59	1.1895	0.48594
						USO1	0.93485	0.70637
						YDL057W	1.1311	0.59724
						MBP1	0.91585	0.68984
						PSA1	0.91145	0.9383
						MCH1	1.0642	0.5029
						PBP4	1.0891	0.78045
						SLC1	1.052	0.81034
						LHP1	1.3964	0.037307
						YDL050C	1.7437	0.038456
						KNH1	1.1754	0.28391
						STP4	0.953	0.72462
						SIT4	1.8936	0.019968
						NPC2	0.92808	0.72835
						MRP10	1.3464	0.39824
						FAD1	0.39488	0.29052
						MTF2	1.0083	0.98632
						PRP11	1.5946	0.16819
						SIR2	0.87196	0.17582
						YDL041W	1.1486	0.24305
						NAT1	0.97315	0.85251
						PRM7	1.2526	0.23436
						BSC1	0.79973	0.35013
						PUS9	0.95348	0.76717
						GPR1	0.96039	0.87194
						YDL034W	1.6663	0.181
						SLM3	0.96959	0.87611
						YDL032W	1.276	0.26095
						DBP10	1.0237	0.95303
						PRP9	1.6149	0.16527
						ARP2	0.59927	0.51288
						MPS1	0.67216	0.5067
						YDL027C	1.2991	0.13173
						YDL026W	1.3452	0.54403
						RTK1	1.3183	0.11848
						YDL025W-A	1.5231	0.63171
						DIA3	0.93931	0.68561
						YDL022C-A	0.946	0.70263
						YDL023C	1.1052	0.63322
						GPD1	1.0605	0.5523
						GPM2	1.0062	0.97929
						RPN4	1.1563	0.42205
						OSH2	1.1254	0.25564
						ERP3	0.76847	0.22252
						CDC7	1.2886	0.37677
						YDL016C	1.0341	0.87795
						TSC13	0	0.5772
						NOP1	0	0.5772
						SLX5	1.0875	0.84647
						YDL012C	0.9864	0.92992
						YDL011C	0.91047	0.65813
						GRX6	0.90479	0.53195
						YDL009C	0.92532	0.80565
						APC11	0.94731	0.76194
						YDL007C-A	1.0384	0.84699
						RPT2	0	0.25411
						PTC1	0.15714	0.2557
						MED2	1.0868	0.72718
						ATP16	0.73765	0.74679
						MCD1	0.9581	0.75088
						NHP10	0.81351	0.45597
						RMD1	0.91048	0.67366
						NTH1	0.95984	0.78328
						YRB1	0.68151	0.39315
						RCR2	1.0557	0.80064
						YDR003W-A	1.0819	0.8006
						RAD57	1.1635	0.26748
						MAF1	1.39	0.34691
						SOK1	1.3945	0.038137
						TRP1	1.3224	0.15848
						YDR008C	1.275	0.37096
						GAL3	0.90921	0.56006
						YDR010C	1.023	0.91744
						SNQ2	1.0983	0.3498
						RPL4B	1.0938	0.61175
						PSF1	1.5029	0.65459
						RAD61	1.1381	0.31236
						HED1	1.0268	0.93642
						YDR015C	1.0633	0.91466
						DAD1	1.3867	0.62381
						KCS1	0.87257	0.16435
						YDR018C	0.92294	0.3853
						GCV1	1.0176	0.73189
						DAS2	0.92777	0.68855
						FAL1	0.73761	0.78437
						ATG31	1.2659	0.22365
						SES1	0.51882	0.18183
						FYV1	0.95564	0.83721
						RPS11A	0.37791	0.16652
						NSI1	0.8806	0.55533
						VPS54	0.48993	0.41291
						REG1	0.9125	0.45427
						YDR029W	0.5161	0.18473
						RAD28	1.0789	0.71306
						MIX14	1.5282	0.3056
						PST2	1.2784	0.067946
						MRH1	0.83995	0.48395
						LYS14	0.86424	0.64545
						YDR034C-A	1.0826	0.88197
						YDR034W-B	1.0542	0.90593
						ARO3	0.9742	0.79532
						EHD3	1.0721	0.57006
						KRS1	0.3785	0.22728
						ENA5	0.71938	0.23518
						ENA2	0	0.57934
						ENA1	0.60861	0.022795
						RSM10	1.0677	0.88264
						YDR042C	1.2113	0.64837
						NRG1	1.1098	0.62295
						HEM13	0	0.72097
						RPC11	0	0.46583
						BAP3	0.95022	0.81231
						HEM12	0	0.14153
						YDR048C	0.99375	0.96327
						VMS1	0.42439	0.49505
						TPI1	1.0764	0.93408
						DET1	0.66503	0.2344
						DBF4	0	0.295
						YDR053W	NaN	NaN
						CDC34	0.72756	0.70908
						PST1	1.1399	0.5526
						YDR056C	1.1431	0.42333
						YOS9	1.0479	0.83453
						TGL2	1.2586	0.13784
						UBC5	0.97753	0.95085
						MAK21	1.1939	0.50455
						YDR061W	1.0723	0.72316
						LCB2	0	0.45918
						AIM7	1.2018	0.12754
						RPS13	3.0146	0.29859
						RRG1	0.97291	0.9664
						RTR2	1.1181	0.59988
						OCA6	1.0096	0.97777
						DOS2	0.9914	0.97589
						DOA4	0.63741	0.52748
						FMP16	1.1756	0.64445
						PAA1	0.20936	0.041519
						IPT1	0.82985	0.11499
						SNF11	0.93975	0.59213
						TPS2	1.4228	0.18447
						PPH3	0.89394	0.57981
						RAD55	0.94895	0.76412
						SED1	1.4036	0.23369
						SHU2	1.2097	0.49345
						PET100	1.5276	0.17199
						TFB5	1.786	0.57519
						VPS41	0.73161	0.75683
						PDC2	0	0.29663
						STN1	0.74586	0.7296
						RRP8	0.80565	0.31564
						TVP23	0.81755	0.61051
						AFR1	1.0336	0.90603
						SSS1	0	0.29449
						RRP1	0	0.35833
						SLU7	1.0479	0.75376
						YDR089W	1.0617	0.75082
						YDR090C	0.8878	0.74626
						RLI1	NaN	NaN
						UBC13	0.36039	0.10573
						DNF2	1.0779	0.48229
						YDR094W	1.0438	0.78748
						YDR095C	1.0744	0.8169
						GIS1	0.71114	0.37251
						MSH6	0.94139	0.44722
						GRX3	1.3361	0.42189
						BMH2	1.0221	0.88185
						TVP15	0.84024	0.47
						ARX1	0.97375	0.91412
						YDR102C	1.2555	0.11395
						STE5	1.0027	0.98552
						SPO71	1.0868	0.71309
						TMS1	0.82649	0.44324
						ARP10	1.1378	0.52028
						TMN2	1.1953	0.3233
						TRS85	1.0963	0.81907
						YDR109C	1.3205	0.26698
						FOB1	1.1423	0.53052
						ALT2	1.1103	0.60976
						IRC2	1.327	0.38453
						PDS1	1.1885	0.49732
						YDR114C	1.0276	0.92857
						YDR115W	2.6951	0.058367
						MRPL1	0.95895	0.88665
						TMA64	0.97438	0.93723
						APC4	0.57463	0.029142
						YDR118W-A	0.67955	0.27913
						VBA4	1.0619	0.54441
						COX26	0.94026	0.92803
						TRM1	0.8074	0.56812
						DPB4	1.4566	0.11065
						KIN1	0.79358	0.2071
						INO2	0	0.50542
						YDR124W	1.1241	0.55412
						ECM18	1.4282	0.048231
						SWF1	0.2416	0.0086777
						ARO1	0.75899	0.61583
						MTC5	0.80656	0.087648
						SAC6	1.0443	0.94996
						FIN1	1.5521	0.041346
						YDR131C	1.0465	0.80327
						YDR132C	1.0887	0.72156
						YDR133C	1.7522	0.58072
						YCF1	1.1762	0.45036
						VPS61	0.95208	0.83924
						RGP1	0.23591	0.26482
						HPR1	1.1602	0.73975
						RUB1	1.1974	0.71563
						MTQ2	0.8377	0.81122
						DOP1	1.1601	0.79325
						PEX7	0.91853	0.79566
						SAN1	0.69375	0.41698
						MKC7	0.7753	0.26612
						TAF12	1.0935	0.84967
						SWI5	0.99987	0.99958
						EKI1	1.0641	0.68349
						KGD2	1.2543	0.36638
						YDR149C	1.3969	0.40408
						NUM1	1.1438	0.49464
						CTH1	0.68919	0.37749
						GIR2	1.1702	0.65338
						ENT5	0.91092	0.76066
						YDR154C	1.3215	0.56784
						CPR1	1.3799	0.58302
						RPA14	0.9609	0.78846
						YDR157W	0.97726	0.91882
						HOM2	1.3584	0.31548
						SAC3	1.1421	0.63556
						SSY1	0	0.45647
						YDR161W	0.71726	0.52113
						NBP2	0.5888	0.43574
						CWC15	1.1228	0.71239
						SEC1	3.2685	0.13531
						TRM82	1.1374	0.46386
						SEC5	0.98182	0.85921
						TAF10	0.56099	0.33931
						CDC37	0	0.033264
						STB3	1.2596	0.31596
						YDR169C-A	0.54652	0.26095
						SEC7	0.22603	0.055349
						HSP42	1.2139	0.46463
						SUP35	1.6995	0.51982
						ARG82	1.2746	0.81896
						HMO1	0.54932	0.10374
						RSM24	0.70471	0.68904
						NGG1	1.8466	0.052425
						UBC1	0.94604	0.96607
						SDH4	0.46443	0.2094
						CSN9	0.88999	0.77672
						YDR179W-A	1.1675	0.76495
						SCC2	1.2786	0.82775
						SAS4	0.91867	0.64987
						CDC1	1.697	0.58274
						YDR182W-A	1.3605	0.20554
						PLP1	0.86041	0.63669
						YDR183C-A	0.6273	0.47623
						ATC1	0.8605	0.49266
						UPS3	1.3324	0.20592
						YDR186C	0.99486	0.99144
						YDR187C	0.87018	0.69353
						CCT6	0.44429	0.26057
						SLY1	0	0.19767
						RVB1	0	0.72097
						HST4	1.0282	0.92125
						NUP42	0.9849	0.9216
						YDR193W	0.96465	0.88703
						MSS116	1.4435	0.43309
						YDR194W-A	1.6129	0.49012
						REF2	0.57381	0.1577
						CAB5	0.89325	0.91507
						CBS2	1.1507	0.82676
						RKM2	0.74565	0.40813
						YDR199W	1.1325	0.76457
						VPS64	0.96082	0.90076
						SPC19	0.56717	0.50554
						RAV2	1.0855	0.83207
						YDR203W	1.635	0.12806
						COQ4	1.1282	0.75906
						MSC2	0.80084	0.23704
						EBS1	0.87883	0.55194
						UME6	0.72195	0.32441
						MSS4	1.0818	0.83238
						YDR209C	1.4154	0.52131
						YDR210W	0.88835	0.9146
						GCD6	2.2252	0.11062
						TCP1	0	0.57614
						UPC2	1.0751	0.77386
						AHA1	1.1419	0.72084
						YDR215C	0.79303	0.1521
						ADR1	0.74206	0.26038
						RAD9	1.8398	0.025287
						SPR28	1.2431	0.42763
						MFB1	1.7782	0.08896
						YDR220C	1.2279	0.55704
						GTB1	0.7614	0.30522
						YDR222W	0.82499	0.65877
						CRF1	0.99278	0.97146
						HTB1	0	0.0047509
						HTA1	0.97729	0.96418
						ADK1	0.22763	0.51279
						SIR4	0.62404	0.24729
						PCF11	0.41871	0.38572
						IVY1	1.1498	0.66435
						YDR230W	0.77623	0.16234
						COX20	1.0381	0.91317
						HEM1	0	0.18912
						RTN1	0.40232	0.25036
						LYS4	0.36948	0.54468
						PRP42	0.77289	0.77158
						FMN1	1.3093	0.82286
						MRPL7	1.2169	0.80938
						SEC26	0	0.44625
						YDR239C	1.1031	0.7097
						SNU56	0.84011	0.82484
						BUD26	0.92727	0.85799
						AMD2	0.96358	0.85225
						PRP28	0	0.52199
						PEX5	0.91034	0.73244
						MNN10	0.70198	0.61864
						TRS23	0.17094	0.1087
						YDR246W-A	0.85169	0.46544
						VHS1	1.0608	0.86283
						YDR248C	0.61458	0.36853
						YDR249C	0.83379	0.46902
						YDR250C	0.94187	0.87627
						PAM1	1.0166	0.94161
						BTT1	1.1538	0.77372
						MET32	0.73187	0.54811
						CHL4	0.95382	0.91008
						RMD5	0.55128	0.20847
						CTA1	0.85648	0.54862
						RKM4	0.93891	0.90794
						HSP78	1.2611	0.5171
						YAP6	1.0742	0.81022
						SWM1	0.95198	0.73318
						EXG2	1.1168	0.41581
						YDR262W	0.86684	0.75775
						DIN7	0.85994	0.45416
						AKR1	0.28264	0.28353
						PEX10	0.69824	0.43482
						HEL2	0.95249	0.87367
						CIA1	0.81819	0.87244
						MSW1	0.87302	0.85573
						YDR269C	0.52696	0.47551
						CCC2	1.0088	0.97541
						YDR271C	1.4181	0.077266
						GLO2	1.7001	0.076118
						DON1	1.287	0.36666
						YDR274C	0.9853	0.9237
						BSC2	1.3666	0.30891
						PMP3	1.9205	0.28098
						MTH1	0.66409	0.11647
						YDR278C	1.4161	0.29261
						RNH202	0.95128	0.81221
						RRP45	3.1263	0.029818
						PHM6	1.2759	0.45086
						YDR282C	0.71943	0.46959
						GCN2	0.81251	0.36665
						DPP1	0.95002	0.81184
						ZIP1	0.80124	0.48629
						YDR286C	1.6691	0.10664
						INM2	1.1377	0.8065
						NSE3	3.4143	0.037546
						RTT103	1.6565	0.27235
						YDR290W	1.4992	0.34009
						HRQ1	0.79734	0.42362
						SRP101	0	0.5847
						SSD1	0.9587	0.81637
						DPL1	0.04599	0.14687
						HDA2	1.1546	0.64325
						MHR1	1.0884	0.84585
						SUR2	1.6227	0.42725
						ATP5	0.96993	0.96765
						BFR2	0	0.31095
						PRO1	1.4837	0.24072
						CFT1	0.91114	0.94986
						GPI11	0	0.23556
						RSC3	2.3712	0.15543
						CPR5	0.86697	0.76111
						HNT2	0.91542	0.82168
						YDR306C	1.0147	0.94898
						PMT7	0.93398	0.69174
						SRB7	5.4137	0.014815
						GIC2	1.1895	0.14698
						SUM1	0.89875	0.35692
						TFB1	0.85639	0.7459
						SSF2	0.98534	0.96066
						PIB1	1.1031	0.46952
						RAD34	1.1813	0.35954
						IPK1	0.26129	0.068804
						OMS1	1.0074	0.98285
						HIM1	0.77896	0.38316
						MCM21	1.0125	0.97724
						YFT2	0.55736	0.33215
						SWA2	0.20411	0.029388
						DAD4	0	0.72097
						YDR320W-B	0.98486	0.95948
						ASP1	0.9502	0.88385
						MRPL35	0.97717	0.97303
						TIM11	3.2511	0.048461
						PEP7	0.47689	0.053083
						UTP4	1.2261	0.77035
						YCG1	1.5654	0.51883
						YSP2	0.70412	0.08653
						YDR327W	0.68696	0.63721
						SKP1	1.0519	0.96542
						PEX3	0.96204	0.91936
						UBX5	1.1356	0.41126
						GPI8	0.37677	0.37151
						IRC3	1.3186	0.62199
						RQC1	0.9747	0.89705
						SWR1	0.8881	0.84689
						MSN5	0.71145	0.043366
						YDR336W	0.86806	0.72452
						MRPS28	0.97986	0.98103
						YDR338C	0.9055	0.53469
						FCF1	0	0.18987
						YDR340W	1.0551	0.85458
						YDR341C	0	0.4572
						HXT7	0.39652	0.40066
						HXT6	1.7625	0.24296
						YDR344C	1.0745	0.48359
						HXT3	0.63188	0.18175
						SVF1	0.86982	0.52462
						MRP1	0.54784	0.55619
						PAL1	0.70183	0.25486
						YPS7	1.4278	0.015471
						ATP22	1.264	0.60804
						SBE2	0.83132	0.64948
						YPQ2	1.1775	0.39529
						TRR1	0.45716	0.44233
						TRP4	1.1647	0.74942
						YDR354C-A	1.631	0.74077
						YDR355C	NaN	NaN
						SPC110	1.112	0.87279
						CNL1	0.97523	0.91098
						GGA1	0.94645	0.91297
						EAF1	0.78447	0.50613
						OPI7	1.0639	0.91649
						BCP1	0	0.4573
						TFC6	0.38829	0.23597
						ESC2	1.437	0.30644
						SEM1	1.7164	0.39449
						CDC40	0.30667	0.4038
						ESF1	0.58718	0.60702
						YDR366C	0.79133	0.16968
						KEI1	0.27212	0.29534
						YPR1	0.80166	0.39044
						XRS2	0.70447	0.098981
						DXO1	0.9251	0.67114
						CTS2	1.0561	0.85128
						YDR371C-A	0	0.48775
						VPS74	0.2558	0.33941
						FRQ1	0	0.44618
						PHO92	0.79015	0.29068
						WIP1	0	0.61823
						BCS1	1.4606	0.39893
						ARH1	0.74242	0.61244
						ATP17	1.3026	0.56186
						LSM6	0.47561	0.73399
						RGA2	0.95493	0.82756
						SDH6	1.6133	0.048889
						ARO10	1.0423	0.88145
						YRA1	0.89015	0.89991
						YDR381C-A	0.48251	0.59371
						RPP2B	0.52692	0.37596
						NKP1	0.84729	0.43263
						ATO3	0.76167	0.31739
						EFT2	1.1691	0.87045
						MUS81	1.2879	0.23085
						YDR387C	0.87229	0.54434
						RVS167	0.75646	0.49784
						SAC7	1.0502	0.84734
						UBA2	1.112	0.83752
						YDR391C	0.87207	0.6497
						SPT3	1.2964	0.38471
						SHE9	1.1488	0.31449
						RPT3	0	0.47537
						SXM1	1.0144	0.96226
						YDR396W	1.0713	0.88928
						NCB2	0.96695	0.94678
						UTP5	0.59182	0.35439
						HPT1	0.69276	0.52913
						URH1	1.3186	0.27555
						YDR401W	1.0362	0.85459
						DIT2	1.2273	0.2549
						DIT1	1.2019	0.19389
						RPB7	0	0.72097
						MRP20	1.3535	0.50692
						PDR15	0.9392	0.69741
						YDR406W-A	0.82427	0.60557
						TRS120	0.46001	0.24895
						ADE8	0	0.30451
						SIZ1	1.0158	0.94039
						STE14	1.1965	0.57421
						DFM1	1.1635	0.55025
						RRP17	2.0358	0.25759
						YDR413C	2.7991	0.10325
						ERD1	0.82591	0.30872
						YDR415C	0.67466	0.24767
						SYF1	0.5224	0.070051
						YDR417C	0	0.17826
						RPL12B	0	0.33153
						RAD30	0.72112	0.36476
						HKR1	0.96676	0.6882
						ARO80	1.2192	0.41519
						SIP1	0.60828	0.065664
						CAD1	0.81518	0.42436
						DYN2	1.4559	0.099935
						SNX41	0.93561	0.70452
						YDR426C	0.86811	0.70634
						RPN9	1.2928	0.8048
						BNA7	0.89265	0.76879
						TIF35	1.8725	0.50019
						CYM1	0.83599	0.18348
						YDR431W	1.038	0.8056
						NPL3	0	0.24855
						YDR433W	0	0.23097
						GPI17	0.66058	0.52027
						PPM1	1.6311	0.027294
						PPZ2	1.2049	0.54382
						GPI19	0.87507	0.76018
						THI74	1.0763	0.7447
						LRS4	0.30077	0.20077
						DOT1	1.1115	0.78664
						APT2	1.1369	0.30216
						YDR442W	0.60807	0.45332
						SSN2	0.48058	0.45317
						YDR444W	0.8559	0.51593
						YDR445C	1.0861	0.60164
						ECM11	0.8106	0.59439
						RPS17B	1.3122	0.40408
						ADA2	1.0687	0.90159
						UTP6	0	0.2935
						RPS18A	0.89603	0.7901
						YHP1	0.97388	0.88346
						PPN1	0.79003	0.35417
						TSA2	0.84852	0.3095
						GUK1	2.1656	0.52063
						YDR455C	0.74369	0.31097
						NHX1	0.49948	0.067757
						TOM1	0.69486	0.38732
						HEH2	0.78741	0.35381
						PFA5	0.78396	0.45624
						TFB3	1.8325	0.25379
						MFA1	1.0595	0.93963
						YDR461C-A	1.4655	0.44303
						MRPL28	1.5752	0.40619
						STP1	0.65469	0.4507
						SPP41	0.65192	0.41951
						YDR464C-A	0.60877	0.51028
						RMT2	1.0657	0.77293
						PKH3	0.73007	0.043451
						YDR467C	0.51362	0.060415
						TLG1	0.34659	0.2346
						SDC1	0.5028	0.22174
						UGO1	0.55496	0.63012
						RPL27B	1.1186	0.76235
						TRS31	0.56763	0.50612
						PRP3	1.0433	0.93008
						JIP4	1.263	0.19038
						YDR476C	0.88807	0.60725
						SNF1	0.3116	0.23306
						SNM1	0	0.44054
						PEX29	1.1567	0.64607
						DIG2	1.1082	0.66754
						PHO8	0.80654	0.53849
						CWC21	1.0406	0.76641
						KRE2	1.1295	0.72382
						VPS52	1.0975	0.87127
						VPS72	1.0773	0.7359
						VPS60	0.62138	0.13505
						RIB3	NaN	NaN
						PAC11	1.282	0.14163
						SLD5	5.6159	0.1415
						PKH1	1.0872	0.69341
						YDR491C	1.1506	0.07672
						IZH1	0.6323	0.019273
						MZM1	0.68421	0.54406
						RSM28	1.0105	0.98434
						VPS3	0.54115	0.27718
						PUF6	1.0744	0.62379
						ITR1	0.8488	0.62302
						SEC20	1.2013	0.44447
						LCD1	0.73829	0.70774
						RPL37B	0.93479	0.89849
						PLM2	1.2535	0.45795
						SAM2	0.94493	0.83558
						LPP1	0.81939	0.51261
						SPG3	2.2724	0.0070474
						PSP1	0.9708	0.89958
						GMC1	1.0683	0.78112
						GIN4	0.94704	0.76564
						GNP1	0.97703	0.92066
						YDR509W	1.377	0.31888
						SMT3	0	0.58385
						YDR510C-A	0.94064	0.94332
						SDH7	1.4833	0.068836
						EMI1	0.91503	0.54009
						GRX2	0.88801	0.71794
						YDR514C	1.0185	0.91541
						SLF1	0.54434	0.41741
						EMI2	0.94846	0.86653
						GRH1	0.99776	0.99085
						EUG1	1.2649	0.41847
						FPR2	1.0353	0.95019
						URC2	1.0378	0.82006
						YDR521W	0.48876	0.16142
						SPS2	1.2051	0.51894
						SPS1	1.2192	0.3639
						AGE1	0.83106	0.49679
						YDR524W-C	1.6581	0.26282
						YDR524C-B	1.4996	0.66382
						YDR524C-A	1.0018	0.99431
						API2	0.95825	0.81866
						SNA2	1.1426	0.58051
						YDR526C	2.8535	0.32812
						RBA50	0.72707	0.64695
						HLR1	0.99121	0.93722
						QCR7	0.95925	0.90353
						APA2	1.2909	0.12177
						CAB1	1.0227	0.98402
						KRE28	1.8597	0.14347
						HSP31	0.76943	0.33638
						FIT1	1.406	0.060945
						YDR535C	1.1159	0.63974
						STL1	1.0242	0.85895
						YDR537C	1.5673	0.28103
						PAD1	1.2877	0.52545
						FDC1	0.78453	0.60317
						IRC4	0.58688	0.20117
						YDR541C	1.2076	0.34905
						PAU10	6.0292	0.034002
						YDR543C	1.4861	0.31847
						YDR544C	2.5358	0.018471
						YRF1-1	NaN	NaN
						YDR545C-A	NaN	NaN
						YEL077C	0.58703	0.19563
						YEL077W-A	0.49169	0.50038
						YEL076C-A	NaN	NaN
						YEL076C	NaN	NaN
						YEL075W-A	0	0.44968
						YEL075C	0	0.44968
						YEL074W	0.96482	0.76717
						YEL073C	0.97966	0.95051
						RMD6	1.0758	0.75914
						DLD3	1.0143	0.94389
						DSF1	0.77899	0.27704
						HXT13	0.81317	0.42434
						YEL068C	1.1461	0.64949
						YEL067C	1.0064	0.9611
						HPA3	1.3403	0.30397
						SIT1	0.93532	0.76439
						AVT2	0.94792	0.79678
						CAN1	0.91337	0.77676
						NPR2	0.48354	0.16818
						CIN8	0.98408	0.95198
						PRB1	0.68027	0.12809
						SOM1	1.089	0.78402
						HHY1	1.0398	0.81586
						PCM1	1.937	0.25902
						YEL057C	0.97469	0.89516
						HAT2	0.95808	0.80046
						POL5	0.36652	0.38134
						RPL12A	0.84286	0.7119
						YEL053W-A	0.90646	0.83427
						MAK10	1.0515	0.72616
						AFG1	1.4136	0.15729
						VMA8	0.69143	0.78844
						YEL050W-A	0.32095	0.12591
						RML2	0.87807	0.84845
						PAU2	1.1929	0.47137
						TCA17	1.0479	0.94028
						FRD1	1.1061	0.54429
						GLY1	0.66064	0.73761
						YEL045C	0.92783	0.73561
						IES6	0.37786	0.24199
						YEL043W	1.0482	0.58518
						GDA1	1.0238	0.91209
						YEF1	1.3303	0.13589
						UTR2	0.96365	0.78661
						CYC7	1.7312	0.0066113
						UTR4	0.99779	0.98844
						RAD23	1.018	0.94659
						ANP1	0.97962	0.93077
						UTR5	1.0774	0.48888
						YEL034C-A	0.69242	0.30905
						HYP2	1.0914	0.83825
						MTC7	1.2237	0.20973
						MCM3	0.68082	0.6981
						YEL032C-A	0	0.57934
						SPF1	0.40675	0.080978
						YEL030C-A	1.007	0.98709
						ECM10	0.81076	0.14098
						BUD16	1.3362	0.12262
						YEL028W	1.1694	0.62033
						VMA3	0.80499	0.86665
						SNU13	2.2813	0.36869
						YEL025C	1.0263	0.81732
						RIP1	0.95633	0.94372
						YEL023C	0.86782	0.15517
						GEA2	1.0954	0.34112
						URA3	0.76431	0.25934
						YEL020C-B	NaN	NaN
						TIM9	0.98592	0.977
						YEL020C	1.1432	0.070887
						MMS21	1.1115	0.68602
						YEL018C-A	1.263	0.44444
						EAF5	1.1675	0.71611
						PMP2	1.0592	0.87882
						GTT3	1.1647	0.47855
						NPP2	1.0605	0.62128
						EDC3	0.931	0.6381
						YEL014C	1.1034	0.18708
						VAC8	1.1352	0.19042
						UBC8	0.9115	0.49376
						GLC3	0.85809	0.17818
						YEL010W	0.95326	0.83444
						YEL009C-A	0.96513	0.8426
						GCN4	1.1013	0.59562
						YEL008W	0.98469	0.94617
						YEL008C-A	0.94058	0.85181
						MIT1	1.4536	0.00031847
						YEA6	0.94021	0.72152
						VAB2	1.2955	0.016668
						YEA4	1.008	0.92742
						GIM4	0.92925	0.55314
						WBP1	1.084	0.74684
						IRC22	0.99009	0.93623
						MNN1	0.95046	0.67767
						NOP16	1.1758	0.67938
						PMI40	0.9523	0.93881
						FMP52	1.0234	0.86897
						YND1	0.83866	0.33337
						NUG1	0.87185	0.56799
						YER006C-A	1.0448	0.79151
						PAC2	0.94881	0.8226
						TMA20	0.86704	0.47155
						SEC3	1.0961	0.35966
						NTF2	0	0.72097
						YER010C	1.0388	0.82214
						TIR1	1.1325	0.41568
						PRE1	1.1046	0.73534
						PRP22	1.1182	0.49054
						HEM14	0.28758	0.39784
						BUD25	1.0985	0.39898
						FAA2	0.92542	0.13504
						BIM1	1.0595	0.56992
						AFG3	0.97906	0.97139
						SPC25	1.5877	0.0091126
						ISC1	0.89075	0.66635
						SBH2	1.2501	0.50154
						GPA2	1.1413	0.10936
						RPN3	0.70234	0.36791
						SRB4	1.351	0.57603
						PRO3	1.8055	0.21632
						YER023C-A	NaN	NaN
						YAT2	0.98636	0.88303
						GCD11	0.85747	0.83008
						CHO1	0.61422	0.63032
						GAL83	0.97953	0.92607
						MIG3	1.0969	0.41296
						SMB1	0.8461	0.26541
						CHZ1	0.8748	0.81485
						YPT31	1.0773	0.65477
						FIR1	0.87809	0.2374
						ZRG8	1.0012	0.99265
						YER034W	1.1199	0.40452
						EDC2	0.97119	0.86214
						ARB1	0.3495	0.32987
						PHM8	0.83837	0.21133
						KRE29	1.6784	0.34737
						YER038W-A	0.85345	0.74062
						HVG1	0.89956	0.69136
						YER039C-A	0.97087	0.92374
						GLN3	1.0496	0.72843
						YEN1	1.0116	0.91543
						MXR1	0.66075	0.23826
						SAH1	0	0.46583
						ERG28	0.66847	0.6734
						MEI4	1.1325	0.51791
						ACA1	1.1234	0.43163
						SPO73	1.059	0.83997
						YER046W-A	0.78784	0.54202
						SAP1	0.73303	0.15757
						CAJ1	1.0538	0.71385
						ISD11	0.40035	0.38813
						TPA1	0.94482	0.87074
						RSM18	0.35515	0.51497
						JHD1	1.1393	0.39964
						HOM3	1.4746	0.02182
						PIC2	0.76722	0.32034
						YER053C-A	1.0726	0.95626
						GIP2	1.2239	0.052063
						HIS1	1.0333	0.86397
						FCY2	1.0125	0.94705
						RPL34A	0.77057	0.55008
						HMF1	0.89508	0.51577
						PET117	1.156	0.73947
						PCL6	0.90233	0.72812
						FCY21	1.1441	0.33757
						FCY22	0.94073	0.74015
						CEM1	0.93336	0.55689
						GPP2	1.0609	0.3834
						THO1	0.87215	0.59104
						VHR2	0.99873	0.99588
						ICL1	1.0337	0.80861
						RRT13	1.5434	0.34106
						YER066C-A	1.2052	0.6849
						RGI1	1.5085	0.12622
						YER067C-A	1.6896	0.014743
						MOT2	0.6866	0.22445
						YER068C-A	1.3684	0.070838
						ARG5%2C6	0.87462	0.81923
						RNR1	0.90771	0.81723
						TDA2	1.1522	0.77115
						VTC1	1.5964	0.026334
						ALD5	1.0975	0.66301
						RPS24A	0.89661	0.91652
						YOS1	0	0.72097
						PTP3	0.76469	0.15167
						YER076C	1.1313	0.32213
						YER076W-A	0.83493	0.62631
						YER077C	1.0469	0.86854
						ICP55	1.1251	0.21341
						YER078W-A	1.0499	0.84043
						YER079W	1.3439	0.23865
						YER079C-A	1.1336	0.63895
						AIM9	1.284	0.23281
						SER3	0.92638	0.61017
						UTP7	1.143	0.82067
						GET2	0.5846	0.40187
						YER084W	1.0634	0.75883
						YER084W-A	1.2699	0.61397
						YER085C	1.2699	0.61397
						ILV1	0.79334	0.77811
						AIM10	0.92707	0.92995
						YER087C-A	0.92725	0.9129
						SBH1	1.2565	0.45445
						DOT6	1.1616	0.35745
						YER088C-A	1.1424	0.10118
						YER088W-B	1.0648	0.63061
						PTC2	1.0161	0.90973
						TRP2	1.2707	0.10867
						YER090C-A	2.7541	0.003487
						MET6	1.6388	0.42687
						YER091C-A	1.1256	0.38197
						IES5	1.0267	0.91363
						TSC11	0.99206	0.97362
						AIM11	1.0835	0.73558
						PUP3	0	0.72097
						RAD51	0.96061	0.92356
						SHC1	1.3476	0.13588
						YER097W	1.2653	0.023531
						UBP9	1.1717	0.35929
						PRS2	0.9509	0.81627
						UBC6	0.94372	0.83817
						AST2	1.0285	0.91387
						RPS8B	0.71029	0.26483
						SSA4	0.76933	0.36835
						RTT105	0.86995	0.82914
						NUP157	0.86135	0.51518
						MAM1	0.87219	0.12521
						GLE2	3.4043	0.098913
						YER107W-A	0.82904	0.77137
						FLO8	0.80558	0.43194
						KAP123	0.93768	0.84021
						SWI4	0.65017	0.088088
						LSM4	0.5814	0.72619
						TMN3	0.8023	0.23954
						BOI2	0.95266	0.84138
						SPR6	1.026	0.94339
						SLX8	0.90519	0.28009
						RPL23B	0.23561	0.39667
						SHO1	0.73871	0.36572
						AVT6	1.4768	0.020814
						YER119C-A	0.90872	0.7412
						SCS2	0.98293	0.96778
						YER121W	1.0388	0.88442
						GLO3	0.74362	0.11472
						YCK3	1.0923	0.81204
						DSE1	1.0866	0.5611
						RSP5	0	0.51338
						NSA2	0	0.3115
						LCP5	1.3078	0.73412
						VFA1	1.5524	0.16188
						SAK1	0.9818	0.91597
						COM2	0.90704	0.41413
						RPS26B	1.0981	0.78836
						PMD1	0.97049	0.805
						GLC7	1.8591	0.42646
						YER133W-A	0.67852	0.60226
						YER134C	0.81555	0.53248
						YER135C	0.69038	0.43929
						GDI1	2.4451	0.342
						YER137C	0.51811	0.0059092
						YER137W-A	0.59905	0.20926
						YER138W-A	0.64139	0.7124
						RTR1	1.4366	0.18579
						EMP65	1.1379	0.61508
						COX15	1.039	0.94038
						MAG1	0.83949	0.65267
						DDI1	1.135	0.41751
						UBP5	1.0108	0.92325
						FTR1	1.4578	0.33885
						YER145C-A	0.90005	0.71431
						LSM5	0.39435	0.047051
						SCC4	0.55595	0.11267
						YER147C-A	0.86299	0.85046
						SPT15	1.1403	0.87974
						YER148W-A	0.47443	0.27144
						PEA2	0.83926	0.62819
						SPI1	0.92923	0.8652
						UBP3	1.2055	0.61214
						YER152C	1.1212	0.62104
						YER152W-A	1.427	0.29655
						PET122	1.1255	0.71069
						OXA1	1.0719	0.9242
						BEM2	0.95206	0.91165
						YER156C	1.0243	0.94165
						COG3	0.61303	0.33353
						YER158C	1.1882	0.025874
						YER158W-A	0.87074	0.69367
						BUR6	0.70227	0.59431
						SPT2	0.9667	0.90306
						RAD4	1.4532	0.1613
						GCG1	0.8456	0.60203
						CHD1	1.3841	0.1758
						PAB1	0.68858	0.72891
						YER165C-A	1.0794	0.89004
						DNF1	1.1166	0.52089
						BCK2	0.82574	0.63106
						CCA1	0.55107	0.59575
						RPH1	1.2655	0.38976
						ADK2	1.4564	0.087012
						RAD3	1.8044	0.14614
						BRR2	0.52414	0.21047
						YER172C-A	0.63789	0.65046
						RAD24	1.1839	0.63057
						GRX4	0.73642	0.12287
						TMT1	0.87245	0.52068
						YER175W-A	0.39652	0.18971
						ECM32	1.1665	0.09194
						BMH1	0.76631	0.51729
						PDA1	1.0188	0.96531
						DMC1	1.2367	0.42404
						ISC10	1.4617	0.046377
						SLO1	0.68264	0.52305
						YER181C	2.5681	0.024183
						FMP10	0.79014	0.4895
						FAU1	1.2222	0.40905
						TOG1	0.94639	0.40289
						PUG1	0.65258	0.14889
						YER186C	1.1526	0.4184
						YER187W	1.0538	0.84282
						YER188W	0.85043	0.50529
						YER188C-A	1.441	0.17842
						YER189W	6.1961	0.027448
						YRF1-2	0.76365	0.24907
						YER190C-A	NaN	NaN
						YER190C-B	NaN	NaN
						YFL068W	NaN	NaN
						YFL067W	1.1979	0.85051
						YFL066C	0.51512	0.6517
						YFL065C	0	0.61903
						YFL064C	0.44357	0.43281
						YFL063W	0.91769	0.72094
						COS4	0.95861	0.92607
						DDI2	0.93209	0.93332
						SNO3	1.0941	0.85461
						SNZ3	1.3514	0.54238
						THI5	0.62023	0.48661
						AAD16	1.1424	0.33426
						AAD6	0.78739	0.31353
						AGP3	1.0445	0.72225
						YFL054C	1.0355	0.79554
						DAK2	1.0466	0.8066
						YFL052W	1.1022	0.64894
						YFL051C	1.2873	0.25709
						ALR2	0.97413	0.8887
						SWP82	1.0638	0.79147
						EMP47	0.88181	0.64539
						RGD2	0.80639	0.2332
						FMP32	1.0588	0.85857
						SEC53	0	0.59599
						OTU1	1.0242	0.90847
						YFL042C	0.89809	0.29557
						YFL041W-A	1.337	0.48367
						FET5	0.86828	0.36416
						YFL040W	1.0246	0.86555
						ACT1	0	0.57967
						YPT1	3.098	0.26867
						TUB2	0.48498	0.51205
						RPO41	0.85752	0.83081
						MOB2	0.90164	0.72374
						RPL22B	0.86833	0.6018
						YFL034W	0.97348	0.83838
						RIM15	0.44958	0.018472
						YFL032W	0.93305	0.77673
						HAC1	0.78593	0.20466
						YFL031C-A	0	0.089594
						AGX1	0.95747	0.75719
						CAK1	0	0.61823
						CAF16	1.4454	0.086953
						GYP8	1.1543	0.13221
						STE2	0.97564	0.61515
						BST1	1.1289	0.064279
						EPL1	0.91392	0.73963
						BUD27	1.0321	0.81955
						FRS2	5.6981	0.011438
						YFL021C-A	1.0495	0.64705
						GAT1	1.1396	0.27006
						PAU5	1.0987	0.82777
						YFL019C	1.2015	0.75786
						LPD1	1.0609	0.66865
						SMX2	2.276	0.20691
						GNA1	1.3091	0.59272
						MDJ1	1.2044	0.57248
						YFL015W-A	0.94545	0.85509
						YFL015C	1.0208	0.91544
						HSP12	1.2875	0.31674
						YFL013W-A	0.85198	0.41395
						IES1	0.87787	0.40876
						YFL012W-A	1.1006	0.69738
						YFL012W	0.94777	0.61341
						HXT10	0.99141	0.95945
						AUA1	1.035	0.83145
						WWM1	1.1465	0.34741
						CDC4	0.9646	0.91412
						SMC1	0.80237	0.86493
						BLM10	1.003	0.98181
						SEC4	4.8607	0.20432
						VTC2	1.0956	0.52997
						MSH4	1.0337	0.79554
						SPB4	0.55942	0.091202
						DEG1	0.88605	0.31903
						LOC1	0.85949	0.7318
						NIC96	0.98134	0.86298
						YPI1	1.5708	0.28965
						RPN11	1.1008	0.80005
						SAD1	0.52286	0.10272
						YFR006W	1.0555	0.73953
						YFH7	1.1498	0.50789
						FAR7	0.80131	0.72889
[truncated: 4,576 more rows]

## Sheet: Dpl1del vs. rest
positively	selected					gene	fold_change	student_ttest
gene	fold_change	student_ttest				YAL069W	1.1309	0.30933
INO1	1.6298	0.46279				YAL068W-A	1.2139	0.62035
negatively	selected					PAU8	0.9755	0.96069
gene	fold_change	student_ttest				YAL067W-A	1.3819	0.12038
DPL1	0.036042	0.0012324				SEO1	0.92962	0.31659
						YAL066W	1.2259	0.46418
						YAL065C	1.0833	0.38927
						YAL064W-B	0.81553	0.58017
						TDA8	0.85878	0.40044
						YAL064W	1.0878	0.81048
						YAL063C-A	1.2238	0.57402
						FLO9	1.2059	0.15615
						GDH3	1.068	0.53495
						BDH2	0.96766	0.74536
						BDH1	1.0608	0.43324
						YAL059C-A	1.0034	0.98151
						ECM1	0.90511	0.4918
						CNE1	1.1021	0.45794
						YAL056C-A	1.0239	0.86933
						GPB2	0.86909	0.38409
						PEX22	1.1547	0.46487
						ACS1	1.1513	0.19337
						FLC2	1.1819	0.091682
						OAF1	1.0964	0.1359
						AIM2	1.217	0.11414
						GEM1	0.98474	0.81378
						YAL047W-A	0.73938	0.17058
						SPC72	0.94367	0.78778
						AIM1	1.2183	0.31741
						YAL045C	0.92683	0.67026
						YAL044W-A	0.92134	0.75613
						GCV3	0.99128	0.93781
						PTA1	0.73532	0.31071
						YAL042C-A	0.98019	0.88327
						ERV46	1.0078	0.93511
						CDC24	0.98456	0.95034
						CLN3	0.96906	0.8672
						CYC3	1.2457	0.48464
						CDC19	1.6146	0.29648
						YAL037C-B	1.2253	0.68833
						YAL037C-A	0.95407	0.8036
						YAL037W	1.1951	0.0022668
						RBG1	0.91105	0.40637
						FUN12	1.1183	0.77955
						YAL034C-B	1.0193	0.90646
						MTW1	1.0815	0.44491
						FUN19	1.0755	0.1947
						POP5	1.3352	0.33412
						PRP45	0.89484	0.50126
						YAL031W-A	0.86807	0.49081
						GIP4	0.99754	0.98033
						SNC1	1.5307	0.0080367
						MYO4	1.0644	0.40367
						FRT2	0.98331	0.83597
						SAW1	1.0437	0.78656
						YAL026C-A	0.86119	0.60493
						DRS2	0.73003	0.3124
						MAK16	2.1529	0.10901
						LTE1	1.1856	0.52684
						PMT2	1.0564	0.69418
						FUN26	1.0555	0.49884
						CCR4	1.1131	0.61042
						ATS1	0.92036	0.61232
						YAL019W-A	0.94719	0.56536
						FUN30	1.09	0.37487
						LDS1	1.0164	0.92715
						PSK1	1.0209	0.60734
						YAL016C-B	0.9966	0.98814
						YAL016C-A	0.95219	0.7749
						TPD3	1.1225	0.80815
						NTG1	0.87141	0.26306
						SYN8	0.78624	0.081468
						DEP1	1.0918	0.36605
						CYS3	0.33311	0.22909
						SWC3	0.8894	0.47919
						MDM10	0.37256	0.50667
						SPO7	0.88656	0.44806
						FUN14	1.16	0.21961
						ERP2	0.98657	0.69383
						SSA1	0.94352	0.59122
						YAL004W	0.91525	0.67251
						EFB1	0.46418	0.58059
						VPS8	0.72257	0.08034
						TFC3	0.77465	0.065856
						NUP60	0.71027	0.0096984
						ERP1	0.7728	0.061801
						SWD1	0.61528	0.034248
						RFA1	0.72931	0.17504
						SEN34	0.86479	0.65569
						BUD14	0.9829	0.69751
						ADE1	1.3513	0.73555
						KIN3	1.046	0.76763
						CDC15	0.79935	0.68683
						YAR019W-A	0.88515	0.28482
						PAU7	0.78437	0.29234
						YAR023C	0.89155	0.16116
						UIP3	0.91076	0.64901
						YAR028W	1.0462	0.85819
						YAR029W	0.75575	0.53461
						YAR030C	0.82076	0.27805
						PRM9	1.1215	0.54122
						MST28	0.89928	0.49637
						YAT1	0.99089	0.89486
						YAR035C-A	0.90237	0.67021
						SWH1	1.0216	0.84176
						YAR047C	1.2604	0.63737
						FLO1	1.0513	0.5545
						YAR053W	1.1148	0.70973
						YAR060C	NaN	NaN
						YAR064W	1.2201	0.18055
						YAR066W	0.5893	0.61885
						YAR068W	0.91943	0.89594
						YAR069C	NaN	NaN
						YAR070C	0.99537	0.99339
						PHO11	2.4684	0.004618
						IMD1	0.6862	0.33023
						YAR075W	0.81697	0.4859
						YBL113C	0.87079	0.57801
						YBL113W-A	0.27184	0.35088
						YBL112C	NaN	NaN
						YBL111C	3.114	0.14296
						YBL109W	0.9504	0.84884
						PAU9	Inf	0.11739
						YBL108W	1.308	0.19154
						YBL107W-A	1.0521	0.96655
						MIX23	1.2086	0.20405
						SRO77	1.0662	0.62586
						PKC1	0.86779	0.80847
						SEA4	0.93934	0.74664
						RTG3	1.4548	0.084352
						SFT2	1.2974	0.41001
						ECM21	1.0417	0.67943
						YBL100W-C	0.61121	0.19703
						YBL100C	1.6294	0.52937
						ATP1	1.5501	0.63822
						BNA4	1.0611	0.77811
						BRN1	0.97555	0.88106
						YBL096C	0.80052	0.42263
						YBL095W	0.88324	0.49201
						YBL094C	0.73435	0.3334
						ROX3	1.3896	0.1606
						RPL32	0	0.57613
						SCS22	1.4478	0.19028
						MAP2	1.1346	0.54162
						MRP21	1.5444	0.24973
						AVT5	1.1479	0.21087
						TEL1	1.3024	0.011336
						RPL23A	1.0463	0.72513
						YBL086C	1.4334	0.0044037
						BOI1	1.0374	0.66464
						CDC27	0.87484	0.47521
						YBL083C	1.5064	0.095644
						ALG3	1.3346	0.032063
						YBL081W	1.26	0.16124
						PET112	1.5198	0.41778
						NUP170	1.0831	0.75084
						ATG8	0.85795	0.79532
						YBL077W	0.79539	0.17283
						ILS1	5.5425	0.057572
						SSA3	1.0037	0.97031
						AAR2	0.9329	0.70491
						YBL073W	0.97211	0.86676
						RPS8A	1.3822	0.36116
						YBL071C-B	1.5468	0.10307
						KTI11	0.78494	0.67279
						YBL071C	1.363	0.092316
						YBL070C	1.5466	0.16494
						AST1	1.2815	0.17157
						YBL068W-A	1.5293	0.49774
						PRS4	0.78195	0.18972
						UBP13	0.9922	0.93012
						SEF1	1.196	0.29814
						YBL065W	0.78295	0.45589
						PRX1	0.94157	0.80439
						KIP1	0.98785	0.89068
						YBL062W	0.9267	0.84547
						SKT5	1.0991	0.60923
						YEL1	1.0578	0.62426
						CMC2	2.4341	0.059615
						YBL059W	0.96735	0.90327
						SHP1	1.1208	0.72499
						PTH2	1.1999	0.23149
						PTC3	1.5062	0.019089
						YBL055C	1.0023	0.988
						TOD6	1.0591	0.73541
						YBL053W	1.3688	0.13523
						SAS3	1.157	0.039852
						PIN4	1.3649	0.21397
						SEC17	4.0232	0.31497
						MOH1	0.8245	0.52334
						RRT1	0.7905	0.39831
						EDE1	0.95327	0.77043
						PSY4	1.1768	0.14942
						COR1	1.4329	0.306
						YBL044W	0.94144	0.3061
						ECM13	0.84967	0.44104
						FUI1	1.1424	0.34422
						PRE7	2.0318	0.62605
						ERD2	1.1053	0.62314
						YBL039W-B	1.6992	0.21502
						URA7	0.91099	0.02788
						YBL039C-A	0.56133	0.48716
						MRPL16	1.4528	0.32451
						APL3	1.0628	0.53791
						YBL036C	1.0869	0.45767
						POL12	1.1268	0.67195
						STU1	0.92023	0.70791
						RIB1	0.77135	0.43052
						HEK2	1.05	0.85337
						SHE1	1.323	0.2195
						PET9	0.75935	0.63651
						YBL029C-A	1.2568	0.20002
						YBL029W	1.0945	0.52943
						YBL028C	1.4023	0.099318
						RPL19B	0.90319	0.7959
						LSM2	2.3483	0.19465
						RRN10	0.68657	0.41434
						NCL1	0.98291	0.85535
						MCM2	1.0492	0.81027
						PIM1	1.1913	0.67044
						HAP3	0.95467	0.61638
						RFT1	1.2552	0.42431
						APN2	0.9835	0.82205
						POP8	1.271	0.13561
						PEP1	0.89522	0.17914
						FUS3	1.1408	0.22785
						ACH1	0.82201	0.23647
						RRN6	1.0064	0.94719
						FMT1	0.92614	0.65976
						YBL012C	1.0918	0.61023
						SCT1	1.0398	0.69989
						YBL010C	0.80967	0.011141
						ALK2	0.8908	0.039867
						YBL008W-A	1.1265	0.46209
						HIR1	0.87992	0.03561
						SLA1	0.86527	0.62475
						LDB7	1.0287	0.8981
						YBL006W-A	0.97135	0.90156
						PDR3	0.89047	0.27445
						UTP20	0.73542	0.36475
						HTA2	0.99475	0.97867
						HTB2	0.84193	0.18414
						ECM15	0.77706	0.24822
						NTH2	0.7584	0.030586
						RER2	0.69689	0.23903
						COQ1	1.1842	0.67552
						GPI18	1.1663	0.83356
						RCR1	0.85526	0.21346
						UGA2	0.83764	0.15269
						DSF2	0.87179	0.15976
						FLR1	0.94217	0.43853
						HHF1	1.1665	0.65969
						HHT1	0.87246	0.3582
						IPP1	1.0039	0.9899
						YBR012C	0.98842	0.94935
						YBR013C	0.91105	0.45352
						GRX7	1.0707	0.72403
						MNN2	0.96133	0.62773
						YBR016W	0.95369	0.7381
						KAP104	1.095	0.66344
						GAL7	0.50574	0.55561
						GAL10	0.82863	0.51726
						GAL1	0.88978	0.76673
						FUR4	1.0262	0.88633
						POA1	1.0365	0.79652
						CHS3	1.0333	0.85215
						SCO2	1.0328	0.82201
						OLA1	0.96302	0.87733
						ETR1	1.0551	0.62278
						YBR027C	0.88611	0.47864
						YPK3	0.85095	0.26077
						CDS1	0.74058	0.57394
						RKM3	1.2791	0.057852
						RPL4A	0.9031	0.80126
						YBR032W	0.84731	0.46088
						EDS1	1.1038	0.4662
						HMT1	1.0607	0.78561
						PDX3	0.90033	0.8218
						CSG2	1.0068	0.99328
						SCO1	1.0063	0.98866
						CHS2	1.3062	0.5343
						ATP3	1.0915	0.91762
						FIG1	1.3487	0.18058
						FAT1	1.1617	0.20079
						CST26	0.9856	0.89935
						QDR3	1.1563	0.21897
						TCM62	0.88682	0.22452
						GIP1	0.89173	0.38428
						ZTA1	0.79359	0.13054
						FMP23	1.1399	0.05284
						RPS11B	1.1076	0.69691
						REB1	0.55875	0.37447
						REG2	0.93209	0.51024
						YBR051W	1.1261	0.6115
						RFS1	1.1432	0.49078
						YBR053C	0.94936	0.61045
						YRO2	0.87486	0.39056
						PRP6	1.0049	0.98297
						YBR056W	1.2067	0.22253
						YBR056W-A	0.80484	0.52359
						YBR056C-B	0.71648	0.30351
						MUM2	0.97216	0.90475
						UBP14	0.90188	0.61576
						TSC3	2.2621	0.062134
						AKL1	1.0049	0.96215
						ORC2	0.81742	0.44794
						TRM7	0.75343	0.28984
						YBR062C	1.2642	0.38989
						YBR063C	1.0619	0.66462
						YBR064W	1.439	0.012031
						ECM2	1.0802	0.25719
						NRG2	1.2212	0.46566
						TIP1	1.452	0.088009
						BAP2	1.0775	0.87875
						TAT1	0.71824	0.49391
						ALG14	0	0.57613
						YBR071W	1.0366	0.85145
						HSP26	1.0834	0.76753
						YBR072C-A	0.90716	0.55115
						RDH54	0.98615	0.93167
						PFF1	1.0219	0.82409
						ECM8	1.3994	0.18149
						YBR076C-A	1.0769	0.72858
						SLM4	1.1785	0.38543
						ECM33	1.2834	0.027132
						RPG1	1.1983	0.44931
						SEC18	0.60723	0.46869
						SPT7	1.5157	0.046576
						UBC4	0.68341	0.27148
						TEC1	1.0344	0.83687
						MIS1	1.151	0.0084135
						RPL19A	0.83538	0.34414
						AAC3	1.1932	0.58391
						YBR085C-A	0.81819	0.38571
						IST2	1.1774	0.37794
						RFC5	0	0.23829
						POL30	0.62805	0.75301
						YBR089W	0	0.57613
						NHP6B	1.0265	0.86045
						YBR090C	1.1675	0.4793
						TIM12	NaN	NaN
						PHO3	1.1798	0.18987
						PHO5	1.0117	0.95572
						PBY1	0.99571	0.9684
						RXT2	1.048	0.8687
						YBR096W	1.0061	0.956
						VPS15	1.0106	0.95459
						MMS4	1.1692	0.23199
						YBR099C	1.4238	0.1095
						FES1	0.95279	0.85579
						EXO84	1.0631	0.80024
						SIF2	1.1772	0.47485
						YBR103C-A	0.84176	0.19711
						YMC2	1.0105	0.9273
						VID24	1.0579	0.75721
						PHO88	1.0222	0.92319
						IML3	1.0677	0.8563
						AIM3	1.0616	0.56827
						CMD1	2.34	0.54812
						YBR109W-A	0.89495	0.782
						ALG1	2.1696	0.38356
						YSA1	1.2438	0.32489
						SUS1	0.89305	0.84246
						CYC8	1.183	0.48093
						YBR113W	1.5115	0.24877
						RAD16	0.96564	0.75889
						LYS2	1.33	0.64617
						YBR116C	1.0968	0.61369
						TKL2	0.97729	0.8514
						TEF2	0.63307	0.59107
						MUD1	1.2362	0.53444
						CBP6	1.3896	0.37796
						GRS1	0	0.57613
						YBR121C-A	NaN	NaN
						MRPL36	0.77592	0.44218
						TFC1	1.4726	0.48273
						YBR124W	0.96759	0.77926
						PTC4	1.0777	0.56761
						TPS1	0.81857	0.72002
						YBR126W-A	1.0232	0.91629
						YBR126W-B	0.83389	0.3886
						VMA2	0.94123	0.81188
						ATG14	1.1329	0.6541
						OPY1	0.94996	0.84401
						SHE3	1.1153	0.69778
						CCZ1	1.8466	0.18883
						YBR131C-A	Inf	0.11739
						AGP2	1.1319	0.49506
						HSL7	0.99668	0.98589
						YBR134W	0.80339	0.21663
						CKS1	1.1299	0.82175
						MEC1	0.49436	0.13347
						YBR137W	1.1006	0.59095
						YBR138C	0.88539	0.36575
						YBR139W	0.98661	0.96726
						IRA1	0.95085	0.80939
						BMT2	0.77314	0.18674
						YBR141W-A	1.0561	0.91063
						MAK5	0.64595	0.48375
						SUP45	0	0.57613
						YBR144C	1.0753	0.76667
						ADH5	1.1206	0.30501
						MRPS9	1.0425	0.94813
						RTC2	1.4241	0.08195
						YSW1	0.83645	0.28593
						ARA1	1.0335	0.875
						TBS1	1.1414	0.59089
						APD1	1.0282	0.84754
						SPP381	1.2317	0.36313
						RIB7	0.40705	0.462
						RPB5	0	0.37558
						CNS1	0.62041	0.49287
						SLI15	1.1004	0.8459
						ICS2	1.1434	0.36614
						AMN1	1.011	0.94423
						IFA38	0.47825	0.4887
						CDC28	1.0108	0.99288
						CSH1	1.1209	0.6801
						TOS1	1.2896	0.18452
						YSY6	0.99783	0.99744
						EXO5	1.3263	0.55024
						ARL1	0.85001	0.70568
						UBS1	0.58687	0.12445
						TYR1	0.7437	0.61118
						POP7	0	0.57613
						PEX32	0.99648	0.98739
						SSE2	1.1858	0.29879
						NPL4	1.2891	0.19355
						SEC66	0.96257	0.91321
						SMY2	0.95288	0.83102
						UMP1	0.72627	0.64831
						YBR174C	1.316	0.09913
						SWD3	0.71814	0.47727
						ECM31	1.0988	0.51532
						EHT1	0.92042	0.66453
						YBR178W	0.99882	0.99418
						FZO1	1.6638	0.27172
						DTR1	1.1882	0.3448
						RPS6B	0.69524	0.31346
						SMP1	1.0554	0.75942
						YBR182C-A	0.63676	0.2173
						YPC1	1.1757	0.6727
						YBR184W	1.1791	0.28209
						MBA1	1.6025	0.036084
						PCH2	1.1369	0.34734
						GDT1	1.0193	0.95406
						NTC20	0.91709	0.61742
						RPS9B	1.3307	0.50214
						YBR190W	0.74813	0.38096
						RPL21A	0.80486	0.8165
						YBR191W-A	1.1212	0.93075
						RIM2	1.4953	0.55565
						MED8	2.1456	0.25252
						AIM4	1.3099	0.35066
						MSI1	1.0346	0.89294
						PGI1	0	0.57613
						YBR196C-A	0.90037	0.4596
						YBR196C-B	1.1304	0.64923
						YBR197C	0.81997	0.34197
						TAF5	2.8363	0.31826
						KTR4	1.2071	0.29178
						BEM1	1.6009	0.16267
						YBR200W-A	1.9074	0.3182
						DER1	1.0545	0.88811
						YBR201C-A	1.0303	0.93007
						MCM7	1.9921	0.0052637
						COS111	0.97159	0.91237
						LDH1	1.1454	0.37335
						KTR3	1.1732	0.33741
						YBR206W	1.0605	0.75137
						FTH1	1.0869	0.6063
						DUR1%2C2	1.0712	0.71223
						YBR209W	1.042	0.45026
						ERV15	0.75384	0.28398
						AME1	1.0577	0.80253
						NGR1	1.0225	0.85078
						MET8	1.043	0.83401
						SDS24	1.0466	0.76432
						HPC2	1.0525	0.86683
						YBP1	1.1548	0.46136
						ATG12	1.0864	0.67906
						PYC2	1.0154	0.76934
						YBR219C	0.97717	0.76253
						YBR220C	1.0978	0.38831
						PDB1	0.84631	0.42247
						YBR221W-A	1.0345	0.79711
						PCS60	0.92547	0.41869
						TDP1	1.0124	0.87638
						YBR223W-A	0.85503	0.55223
						YBR224W	1.0002	0.99944
						YBR225W	1.2153	0.37533
						YBR226C	1.2319	0.52152
						MCX1	0.98784	0.94967
						SLX1	1.4462	0.0051253
						ROT2	0.97967	0.92336
						OM14	1.4392	0.33571
						YBR230W-A	0.92123	0.81646
						SWC5	0.90851	0.76048
						YBR232C	1.3531	0.050282
						PBP2	1.1604	0.29176
						DAD3	0	0.37534
						ARC40	Inf	0.11739
						VHC1	1.0546	0.76156
						ABD1	1.3148	0.7217
						PRP5	1.2597	0.79399
						YBR238C	1.3421	0.075354
						ERT1	1.1334	0.23153
						THI2	0.66264	0.054594
						YBR241C	1.0461	0.84541
						YBR242W	0.69368	0.13685
						ALG7	1.449	0.69621
						GPX2	1.4495	0.091433
						ISW1	0.76664	0.1335
						RRT2	1.2869	0.31149
						ENP1	0.27182	0.19994
						HIS7	1.2795	0.13366
						ARO4	1.1915	0.33708
						SPO23	0.99627	0.98224
						MRPS5	1.2335	0.6347
						DUT1	5.6035	0.097341
						SRB6	0.60049	0.31844
						TRS20	0	0.21778
						MTC4	1.0914	0.69181
						YBR255C-A	1.8126	0.031585
						RIB5	0.95116	0.92531
						POP4	0	0.37394
						SHG1	1.1898	0.51121
						YBR259W	1.0149	0.84421
						RGD1	0.92996	0.71266
						TAE1	0.87682	0.36747
						MIC12	1.1439	0.70679
						SHM1	1.0328	0.77758
						YPT10	1.1051	0.55512
						TSC10	1.1958	0.72674
						REI1	1.0076	0.97472
						SLM6	1.2044	0.73554
						MRPL37	0.74157	0.72734
						FMP21	1.4548	0.21857
						BIT2	1.2866	0.22473
						EFM2	1.1439	0.59266
						HSM3	1.1867	0.27922
						UBX7	1.4971	0.13845
						CHK1	0.79805	0.40001
						RIF1	1.1427	0.33435
						PPS1	0.83823	0.22543
						YBR277C	1.1126	0.6497
						DPB3	1.4798	0.085762
						PAF1	1.0905	0.6413
						SAF1	1.1783	0.52877
						DUG2	0.93911	0.69228
						MRPL27	1.5514	0.43699
						SSH1	0.8968	0.33642
						YBR284W	1.0215	0.78875
						YBR285W	1.1402	0.82992
						APE3	0.97076	0.88454
						YBR287W	1.0029	0.9825
						APM3	1.0608	0.79171
						SNF5	1.0809	0.65467
						BSD2	1.2523	0.22428
						CTP1	0.99901	0.99145
						YBR292C	1.3471	0.13153
						VBA2	1.0866	0.62529
						SUL1	1.1568	0.066702
						PCA1	1.0219	0.90478
						PHO89	1.2573	0.081745
						YBR296C-A	1.3201	0.40725
						MAL33	1.0535	0.71928
						MAL31	1.1513	0.6485
						YBR298C-A	0.89624	0.68224
						MAL32	1.4098	0.15221
						YBR300C	1.2714	0.49909
						PAU24	0.89906	0.82097
						COS2	3.2742	0.31024
						YCL076W	1.8503	0.2315
						GEX1	1.3406	0.37563
						VBA3	2.6791	0.093774
						YCL068C	1.985	0.2871
						HMLALPHA2	NaN	NaN
						HMLALPHA1	NaN	NaN
						YCL065W	Inf	0.11739
						CHA1	1.0295	0.94856
						VAC17	1.0744	0.63396
						MRC1	1.2384	0.31865
						KRR1	1.9597	0.17915
						FYV5	1.1516	0.53972
						ADF1	1.0242	0.96578
						MIC10	1.6088	0.22528
						PRD1	0.9115	0.67221
						PEX34	1.0122	0.97115
						KAR4	1.0279	0.878
						SPB1	1.3364	0.45309
						PBN1	1.1641	0.37615
						LRE1	0.91938	0.57702
						APA1	1.3418	0.071797
						YCL049C	1.0181	0.8974
						YCL048W-A	1.2445	0.45278
						SPS22	1.0907	0.67331
						POF1	0.86547	0.28144
						EMC1	1.1772	0.42482
						YCL046W	1.0221	0.9503
						MGR1	1.3233	0.17854
						PDI1	1.8952	0.35317
						YCL041C	1.037	0.84445
						YCL042W	0.72016	0.063439
						GLK1	0.97553	0.76682
						GID7	1.1418	0.33475
						ATG22	0.95148	0.63725
						SRO9	1.1618	0.14597
						GFD2	1.0023	0.98723
						GRX1	1.1077	0.70856
						LSB5	0.78918	0.056706
						MXR2	1.2019	0.39954
						STE50	0.93218	0.52072
						RRP7	1.2233	0.73928
						HIS4	0.96544	0.7661
						BIK1	1.0814	0.62038
						RNQ1	1.1134	0.23255
						FUS1	1.1223	0.13213
						HBN1	1.0933	0.59225
						FRM2	1.0861	0.31896
						AGP1	1.1384	0.059541
						YCL023C	1.2199	0.083317
						KCC4	0.91316	0.24415
						YCL022C	0.95268	0.68501
						YCL021W-A	0.97408	0.75706
						LEU2	NaN	NaN
						NFS1	2.0745	0.29173
						DCC1	1.0413	0.81046
						BUD3	0.88906	0.1311
						YCL012C	0.98227	0.91983
						GBP2	1.0615	0.60055
						SGF29	0.92945	0.76529
						ILV6	0.98536	0.8981
						STP22	0.88632	0.52366
						YCL007C	0.96618	0.8302
						VMA9	0.6549	0.43591
						LDB16	0.96766	0.87711
						PGS1	1.0445	0.93205
						YCL002C	0.95082	0.75222
						RER1	0.9538	0.90394
						YCL001W-A	1.0534	0.90166
						YCL001W-B	0.88129	0.41706
						YCR001W	0.88465	0.37968
						CDC10	1.5422	0.29598
						MRPL32	0.98665	0.95923
						YCP4	1.0306	0.87288
						CIT2	0.87517	0.24737
						YCR006C	0.92726	0.73296
						YCR007C	0.95428	0.80933
						SAT4	1.1253	0.36722
						RVS161	0.90767	0.81123
						ADY2	1.1545	0.31276
						ADP1	0.93654	0.29013
						PGK1	1.8891	0.26449
						YCR013C	1.2716	0.28076
						POL4	0.96412	0.64793
						YCR015C	0.98774	0.93425
						YCR016W	0.91206	0.56275
						CWH43	0.97633	0.83948
						SRD1	0.76196	0.27952
						YCR018C-A	0.85733	0.41682
						MAK32	0.9912	0.93639
						PET18	0.86463	0.41879
						MAK31	0.73893	0.42596
						HTL1	1.5285	0.44898
						HSP30	0.92121	0.31406
						YCR022C	1.0031	0.9759
						YCR023C	1.0413	0.56979
						SLM5	1.3482	0.51333
						YCR024C-B	0.96611	0.87989
						PMP1	0.94731	0.81013
						YCR025C	0.88196	0.2979
						NPP1	1.0051	0.96035
						RHB1	1.2495	0.42318
						FEN2	0.88613	0.7362
						RIM1	2.5102	0.096271
						SYP1	1.069	0.68879
						RPS14A	0.90482	0.74693
						BPH1	1.1545	0.24323
						SNT1	1.031	0.8935
						ELO2	0.83176	0.62724
						RRP43	0	0.21384
						RBK1	0.96705	0.54326
						PHO87	1.1033	0.45682
						BUD5	1.3426	0.34392
						YCR038W-A	1.4861	0.095133
						MATALPHA2	1.6899	0.47699
						MATALPHA1	NaN	NaN
						YCR041W	2.2017	0.045895
						TAF2	1.1272	0.73989
						YCR043C	0.84237	0.46516
						PER1	1.875	0.37131
						RRT12	1.0278	0.76049
						YCR045W-A	1.0841	0.72084
						IMG1	1.3458	0.40764
						BUD23	1.0568	0.84154
						YCR047W-A	0.52287	0.59446
						YCR049C	1.1135	0.42158
						ARE1	0.90278	0.36962
						YCR050C	1.0935	0.71759
						YCR051W	0.86245	0.4911
						RSC6	1.4216	0.24711
						THR4	0.78384	0.35395
						CTR86	0.8368	0.59538
						PWP2	0.89544	0.73893
						YIH1	1.276	0.049195
						TAH1	0.57527	0.20818
						YCR061W	1.2264	0.0025731
						YCR064C	0.98442	0.9186
						BUD31	0.97525	0.93997
						HCM1	0.90333	0.34222
						RAD18	1.2301	0.51708
						SED4	1.2279	0.0077937
						ATG15	1.1188	0.36638
						CPR4	1.2352	0.16355
						IMG2	1.7002	0.35354
						RSA4	NaN	NaN
						SSK22	1.0441	0.69874
						SOL2	1.0372	0.79251
						ERS1	1.2344	0.13671
						YCR075W-A	0.98855	0.97877
						FUB1	0.96278	0.88371
						PAT1	1.3117	0.35935
						PTC6	1.2879	0.05441
						SRB8	0.58347	0.49928
						YCR081C-A	0.80293	0.83725
						AHC2	0.99105	0.97871
						TRX3	1.2043	0.32914
						TUP1	1.3865	0.51126
						YCR085W	1.3291	0.19726
						CSM1	1.6039	0.033361
						YCR087W	0.80074	0.23317
						YCR087C-A	0.78809	0.28065
						ABP1	0.9825	0.85815
						FIG2	0.97655	0.86749
						YCR090C	1.0644	0.79587
						KIN82	0.826	0.178
						MSH3	1.1585	0.40051
						CDC39	1.5213	0.14467
						CDC50	0.83563	0.77372
						OCA4	1.1555	0.64912
						YCR095W-A	0.8599	0.83273
						HMRA2	NaN	NaN
						HMRA1	2.3968	0.11167
						YCR097W-A	0.87464	0.78107
						GIT1	1.2733	0.18238
						YCR099C	1.5117	0.35327
						YCR100C	1.4685	0.047773
						YCR101C	1.326	0.2991
						YCR102C	1.311	0.21695
						YCR102W-A	2.0005	0.26191
						PAU3	1.0463	0.83047
						ADH7	0.83723	0.42598
						RDS1	1.2107	0.31846
						AAD3	1.272	0.40867
						YCR108C	1.0254	0.91505
						COS7	0.91392	0.85645
						YDL247W-A	0	0.57613
						MPH2	0.12152	0.15662
						SOR2	0.59822	0.59474
						HXT15	1.7627	0.18963
						THI13	0.6698	0.2533
						AAD4	1.0383	0.81285
						YDL242W	0.64624	0.025114
						YDL241W	1.3924	0.32573
						YDL240C-A	1.108	0.3423
						LRG1	0.87842	0.15282
						ADY3	1.1054	0.23572
						GUD1	1.0802	0.69613
						AIM6	1.256	0.1765
						PHO13	0.57159	0.056191
						YPD1	1.7369	0.081453
						GYP7	0.94581	0.61859
						MFG1	1.0331	0.86994
						OST4	0	0.57613
						BRE4	1.0353	0.64902
						PTP1	1.369	0.098945
						SSB1	0.98349	0.93529
						YDL228C	1.284	0.22935
						HO	1.0944	0.60402
						GCS1	1.1607	0.49736
						SHS1	1.3696	0.16973
						WHI4	1.0722	0.82479
						HBT1	1.0422	0.65506
						FMP45	1.1786	0.62765
						YDL221W	0.92862	0.64338
						CDC13	0.9237	0.63513
						DTD1	1.5784	0.37336
						YDL218W	0.78942	0.14055
						TIM22	3.0666	0.015684
						RRI1	1.2924	0.096089
						GDH2	0.95309	0.62283
						PRR2	1.1438	0.32211
						NOP6	0.86947	0.71622
						SHR3	0.73398	0.6582
						YDL211C	1.1982	0.31097
						UGA4	0.98026	0.88385
						CWC2	2.6737	0.2338
						NHP2	0.74189	0.16328
						GLE1	1.0146	0.95488
						YDL206W	0.83545	0.49257
						HEM3	0.39269	0.53814
						RTN2	1.2741	0.041955
						ACK1	0.98762	0.9291
						MRPL11	1.283	0.60973
						TRM8	0.81248	0.088613
						MGT1	1.2517	0.3423
						YDL199C	0.85229	0.33622
						GGC1	0.64643	0.42907
						ASF2	1.0497	0.79797
						YDL196W	0.9691	0.56669
						SEC31	0.33255	0.27399
						SNF3	1.269	0.045645
						NUS1	1.8985	0.1761
						ARF1	1.2547	0.4375
						RPL35A	1.4322	0.74128
						UFD2	1.4188	0.063993
						RBS1	1.2511	0.29977
						PPH22	1.2984	0.18653
						YDL187C	1.1136	0.70578
						YDL186W	1.1143	0.70748
						YDL185C-A	2.0865	0.050188
						VMA1	0.981	0.96257
						RPL41A	0	0.57613
						YDL183C	0.91794	0.36678
						LYS20	1.3609	0.055456
						INH1	1.3232	0.15616
						YDL180W	1.2697	0.11975
						PCL9	1.163	0.60329
						DLD2	0.88238	0.41152
						YDL177C	0.985	0.95562
						YDL176W	1.0719	0.42198
						AIR2	0.89029	0.31526
						DLD1	0.91285	0.39142
						PAR32	0.75472	0.22637
						YDL172C	0.8507	0.5131
						GLT1	1.1632	0.16039
						UGA3	1.061	0.1721
						UGX2	0.91502	0.6777
						SFA1	1.1159	0.67401
						NRP1	1.2298	0.33517
						FAP7	1.0389	0.95979
						CDC36	1.0477	0.93561
						CDC9	1.06	0.86456
						YDL163W	1.0512	0.88261
						YDL162C	1.0613	0.42332
						ENT1	1.0717	0.67051
						MHF2	1.2657	0.53091
						DHH1	1.1134	0.78631
						YDL159W-A	1.012	0.93992
						STE7	0.90989	0.32962
						YDL159C-B	1.1059	0.83621
						YDL158C	0.6786	0.46747
						YDL157C	1.2457	0.52528
						CMR1	1.0863	0.59018
						CLB3	1.0172	0.92236
						MSH5	1.0558	0.68304
						SAS10	1.1133	0.84352
						YDL152W	1.0666	0.76614
						BUD30	1.2635	0.72026
						RPC53	1.1189	0.87261
						ATG9	1.4708	0.051258
						NOP14	1.2873	0.043625
						RPN5	0.50858	0.3746
						LDB17	1.0812	0.77321
						COP1	0.70396	0.52221
						YDL144C	0.98679	0.94407
						CCT4	0.95592	0.9713
						CRD1	1.2128	0.33398
						BPL1	1.4445	0.56211
						RPO21	1.3112	0.37138
						SCM3	2.9719	0.021593
						RGT2	0.9382	0.68686
						ARF2	0.93988	0.68066
						RPL35B	0.94176	0.86942
						RDI1	1.0077	0.97465
						PPH21	0.98257	0.89269
						RPL41B	2.0296	0.36372
						SRF1	1.0574	0.76151
						CDC53	1.0641	0.8883
						LYS21	1.1785	0.25857
						STF1	0.94897	0.84452
						RPP1B	1.0167	0.94094
						YDL129W	0.92769	0.64425
						VCX1	1.0834	0.72651
						PCL2	1.0612	0.76709
						CDC48	0.64984	0.44841
						HNT1	1.0709	0.61406
						YDL124W	0.93086	0.61007
						SNA4	1.0087	0.96994
						UBP1	1.1067	0.67447
						YDL121C	1.028	0.92288
						YFH1	4.3718	0.10122
						YDL119C	1.1553	0.44369
						YDL118W	1.3997	0.31952
						CYK3	1.2578	0.046973
						NUP84	1.4545	0.4588
						IWR1	1.1778	0.50089
						YDL114W-A	0	0.57613
						YDL114W	1.1494	0.37356
						ATG20	0.98007	0.91051
						TRM3	1.0873	0.057539
						RRP42	0.8038	0.55474
						TMA17	1.1036	0.70907
						YDL109C	0.77502	0.044375
						KIN28	0.90148	0.65637
						MSS2	1.2901	0.48656
						PHO2	1.104	0.7689
						NSE4	0.35329	0.36348
						QRI7	1.0083	0.96112
						QRI1	1.4518	0.30105
						POL3	0.45987	0.0044969
						DUN1	0.87922	0.59343
						GET3	1.4702	0.072768
						BUG1	1.0351	0.84085
						SNU23	0.60829	0.035609
						RPN6	1.8418	0.38563
						OPI6	0.89463	0.61663
						PMT1	0.9365	0.71476
						YDL094C	0.96418	0.82616
						PMT5	0.94362	0.070874
						SRP14	1.0101	0.97379
						UBX3	0.96355	0.82846
						RAM1	1.0243	0.95731
						NUR1	0.99889	0.99125
						ASM4	0.96114	0.81377
						LUC7	0.77191	0.39332
						YDL086W	0.96192	0.78955
						YDL086C-A	0.84148	0.3937
						YDL085C-A	1.1161	0.71036
						NDE2	0.96506	0.85523
						SUB2	1.2061	0.71346
						RPS16B	1.3001	0.24298
						RPL13A	0.98648	0.94886
						RPP1A	1.5189	0.24289
						THI3	0.8946	0.51804
						MRK1	1.0846	0.42729
						MDH3	1.2085	0.3851
						VAM6	1.2835	0.61588
						RXT3	1.035	0.87932
						RPL31A	1.5397	0.58278
						BRE1	0.79614	0.61081
						YDL073W	1.3686	0.14894
						YET3	1.2851	0.34376
						YDL071C	1.1085	0.61971
						BDF2	0.88895	0.52163
						CBS1	1.9283	0.024666
						YDL068W	2.0878	0.09393
						COX9	0.9999	0.99992
						IDP1	0.88847	0.32198
						PEX19	1.2519	0.22115
						UBC9	2.34	0.54812
						SYO1	0.97496	0.91932
						YDL062W	0.98052	0.92357
						RPS29B	0.58979	0.34376
						TSR1	0.25215	0.19964
						RAD59	1.0831	0.69774
						USO1	0.9418	0.66066
						YDL057W	0.95791	0.82363
						MBP1	0.95102	0.76472
						PSA1	0.51221	0.5181
						MCH1	1.0406	0.58825
						PBP4	0.72774	0.18638
						SLC1	0.8912	0.49007
						LHP1	1.2836	0.075677
						YDL050C	1.573	0.058376
						KNH1	1.1643	0.19122
						STP4	0.96449	0.7303
						SIT4	1.7987	0.00852
						NPC2	1.0088	0.95726
						MRP10	1.3961	0.21995
						FAD1	0.71585	0.54068
						MTF2	1.1196	0.75626
						PRP11	1.6137	0.06869
						SIR2	0.89659	0.14779
						YDL041W	1.0532	0.60893
						NAT1	1.1306	0.22524
						PRM7	1.2077	0.21365
						BSC1	0.86416	0.41352
						PUS9	0.96943	0.80154
						GPR1	1.0853	0.66048
						YDL034W	1.7093	0.071439
						SLM3	1.0398	0.79508
						YDL032W	1.2609	0.17049
						DBP10	0.63281	0.13655
						PRP9	1.4403	0.22639
						ARP2	0.82671	0.72161
						MPS1	0.68252	0.37517
						YDL027C	1.0257	0.8782
						YDL026W	1.0919	0.83408
						RTK1	1.3072	0.042289
						YDL025W-A	3.106	0.040424
						DIA3	0.92986	0.53623
						YDL022C-A	0.93846	0.56654
						YDL023C	1.2003	0.22881
						GPD1	1.0821	0.28387
						GPM2	0.90985	0.6105
						RPN4	1.2204	0.12376
						OSH2	1.061	0.49419
						ERP3	0.75131	0.04602
						CDC7	1.233	0.36754
						YDL016C	0.97451	0.88084
						TSC13	0	0.37534
						NOP1	0	0.37534
						SLX5	0.96431	0.9171
						YDL012C	0.83501	0.094167
						YDL011C	0.77991	0.087689
						GRX6	0.85575	0.17372
						YDL009C	0.92991	0.76305
						APC11	0.81697	0.10295
						YDL007C-A	0.93109	0.64329
						RPT2	0.35789	0.33016
						PTC1	0.5512	0.44824
						MED2	0.85523	0.41362
						ATP16	0.78299	0.72316
						MCD1	0.93503	0.5121
						NHP10	0.69244	0.042039
						RMD1	0.80398	0.17286
						NTH1	0.84452	0.099982
						YRB1	0.96805	0.91846
						RCR2	0.94554	0.74374
						YDR003W-A	1.0895	0.72451
						RAD57	1.0891	0.45264
						MAF1	1.4251	0.19327
						SOK1	1.0385	0.8262
						TRP1	1.0663	0.72818
						YDR008C	1.0633	0.79444
						GAL3	0.90271	0.40386
						YDR010C	0.85853	0.3694
						SNQ2	1.0191	0.82126
						RPL4B	0.91709	0.54521
						PSF1	0.62621	0.60508
						RAD61	0.92959	0.50248
						HED1	1.018	0.94477
						YDR015C	1.1689	0.72048
						DAD1	1.3505	0.5806
						KCS1	0.93387	0.38093
						YDR018C	0.88894	0.055299
						GCV1	0.96991	0.43106
						DAS2	0.81497	0.11763
						FAL1	1.6299	0.47874
						ATG31	1.1536	0.38545
						SES1	0.92294	0.81078
						FYV1	1.0482	0.77695
						RPS11A	1.0508	0.90598
						NSI1	0.91209	0.5725
						VPS54	0.74855	0.61087
						REG1	0.99572	0.96384
						YDR029W	0.93298	0.83753
						RAD28	1.0042	0.98002
						MIX14	1.4526	0.27703
						PST2	1.1351	0.30884
						MRH1	0.99513	0.97912
						LYS14	1.0288	0.90343
						YDR034C-A	0.51863	0.14134
						YDR034W-B	0.96842	0.928
						ARO3	0.97572	0.75133
						EHD3	0.94766	0.5856
						KRS1	0.48468	0.15488
						ENA5	0.72278	0.088293
						ENA2	2.0116	0.6317
						ENA1	0.74766	0.081537
						RSM10	0.91375	0.80109
						YDR042C	1.0281	0.93704
						NRG1	1.0864	0.62037
						HEM13	0	0.57613
						RPC11	0	0.23633
						BAP3	1.1234	0.45347
						HEM12	0.19649	0.073932
						YDR048C	0.99383	0.95314
						VMS1	1.3632	0.64872
						TPI1	1.7828	0.34231
						DET1	0.73266	0.20136
						DBF4	0.64188	0.65994
						YDR053W	NaN	NaN
						CDC34	0.728	0.61402
						PST1	1.0627	0.73415
						YDR056C	1.1631	0.23062
						YOS9	1.0262	0.88287
						TGL2	1.198	0.15352
						UBC5	1.0588	0.83775
						MAK21	1.1235	0.58904
						YDR061W	1.1139	0.47083
						LCB2	0.26156	0.44227
						AIM7	1.0699	0.53512
						RPS13	1.2561	0.84673
						RRG1	1.2502	0.63634
						RTR2	1.0384	0.82682
						OCA6	0.92043	0.75915
						DOS2	1.2872	0.18611
						DOA4	0.89124	0.81429
						FMP16	1.1027	0.72982
						PAA1	0.70157	0.42037
						IPT1	0.90456	0.28587
						SNF11	0.92662	0.38113
						TPS2	1.107	0.68221
						PPH3	0.90781	0.52763
						RAD55	0.98433	0.90601
						SED1	1.302	0.26755
						SHU2	1.1415	0.5574
						PET100	1.3966	0.20691
						TFB5	1.2256	0.8307
						VPS41	1.2471	0.74079
						PDC2	0.1112	0.14661
						STN1	0.74917	0.64584
						RRP8	1.0703	0.66957
						TVP23	0.88712	0.68378
						AFR1	1.0599	0.7873
						SSS1	0.6442	0.66199
						RRP1	0.48778	0.55273
						SLU7	0.90078	0.36576
						YDR089W	0.96784	0.82843
						YDR090C	1.081	0.77216
						RLI1	NaN	NaN
						UBC13	0.54752	0.12918
						DNF2	0.96347	0.66909
						YDR094W	0.92045	0.50612
						YDR095C	0.77209	0.29446
						GIS1	0.82026	0.47603
						MSH6	1.0342	0.57929
						GRX3	0.89486	0.7336
						BMH2	1.0554	0.6314
						TVP15	1.0097	0.95744
						ARX1	0.88237	0.51031
						YDR102C	1.0233	0.86691
						STE5	0.98057	0.86448
						SPO71	1.1556	0.39428
						TMS1	0.93363	0.71356
						ARP10	1.1021	0.54324
						TMN2	1.0835	0.5983
						TRS85	0.90724	0.76653
						YDR109C	1.1174	0.61455
						FOB1	1.1871	0.28254
						ALT2	1.0541	0.74865
						IRC2	1.3163	0.28733
						PDS1	1.3866	0.046895
						YDR114C	1.2688	0.25944
						YDR115W	2.1252	0.15938
						MRPL1	1.0833	0.71506
						TMA64	1.3945	0.10762
						APC4	0.94778	0.79517
						YDR118W-A	0.72751	0.20901
						VBA4	1.055	0.48701
						COX26	0.76163	0.6158
						TRM1	1.0165	0.95211
						DPB4	1.2162	0.37211
						KIN1	0.92798	0.60004
						INO2	0.89954	0.94071
						YDR124W	0.95744	0.79041
						ECM18	1.1565	0.42299
						SWF1	0.67404	0.27454
						ARO1	1.1832	0.65236
						MTC5	0.93802	0.54063
						SAC6	1.6253	0.30007
						FIN1	1.5583	0.0016743
						YDR131C	1.2305	0.076488
						YDR132C	1.0989	0.61096
						YDR133C	1.1991	0.84552
						YCF1	1.2008	0.26403
						VPS61	0.88887	0.52499
						RGP1	1.0195	0.97572
						HPR1	1.0542	0.88434
						RUB1	0.82854	0.65766
						MTQ2	1.3853	0.51072
						DOP1	1.0853	0.85746
						PEX7	0.94908	0.83422
						SAN1	0.64284	0.16347
						MKC7	1.0694	0.69152
						TAF12	0.90461	0.79445
						SWI5	0.87116	0.45035
						EKI1	1.0688	0.57313
						KGD2	1.3575	0.084613
						YDR149C	1.0074	0.98364
						NUM1	1.0302	0.85482
						CTH1	0.73375	0.30565
						GIR2	1.2351	0.43144
						ENT5	1.003	0.98978
						YDR154C	1.3633	0.4215
						CPR1	0.95081	0.92308
						RPA14	0.89935	0.3389
						YDR157W	0.91419	0.60692
						HOM2	1.2029	0.47816
						SAC3	1.3063	0.17754
						SSY1	1.2797	0.83566
						YDR161W	1.0321	0.93026
						NBP2	0.98846	0.97944
						CWC15	1.2749	0.28857
						SEC1	1.6417	0.58188
						TRM82	1.077	0.60208
						SEC5	1.0741	0.33823
						TAF10	0.92989	0.85756
						CDC37	0.51356	0.25767
						STB3	1.0667	0.74755
						YDR169C-A	0.59489	0.15322
						SEC7	0.54194	0.17091
						HSP42	1.0041	0.98554
						SUP35	0.70814	0.68154
						ARG82	3.125	0.084345
						HMO1	0.56642	0.0088135
						RSM24	1.4721	0.47742
						NGG1	1.589	0.11711
						UBC1	1.4855	0.66342
						SDH4	0.56422	0.15443
						CSN9	1.1555	0.62255
						YDR179W-A	1.0936	0.83005
						SCC2	0.53277	0.56583
						SAS4	0.95184	0.72926
						CDC1	0.70707	0.72318
						YDR182W-A	1.4256	0.038877
						PLP1	1.0359	0.88055
						YDR183C-A	0.66343	0.37722
						ATC1	0.94326	0.7248
						UPS3	1.1752	0.414
						YDR186C	1.1186	0.75636
						YDR187C	0.9156	0.74005
						CCT6	0.82685	0.6797
						SLY1	0.36262	0.27902
						RVB1	0	0.57613
						HST4	1.0763	0.73308
						NUP42	1.0933	0.43007
						YDR193W	0.93471	0.72984
						MSS116	1.4908	0.28218
						YDR194W-A	0.93967	0.92466
						REF2	0.90801	0.73147
						CAB5	0.64306	0.60868
						CBS2	1.4715	0.40986
						RKM2	0.90835	0.71182
						YDR199W	1.3804	0.27899
						VPS64	1.3584	0.13447
						SPC19	1.1302	0.81894
						RAV2	0.8331	0.5638
						YDR203W	1.3282	0.34769
						COQ4	1.4335	0.18439
						MSC2	0.91004	0.51421
						EBS1	1.049	0.76663
						UME6	0.89648	0.65321
						MSS4	1.3263	0.28406
						YDR209C	1.8679	0.096524
						YDR210W	1.8674	0.37606
						GCD6	1.748	0.25377
						TCP1	0	0.37394
						UPC2	1.0105	0.9586
						AHA1	1.1616	0.6057
						YDR215C	0.79408	0.031436
						ADR1	0.9051	0.61658
						RAD9	1.742	0.013085
						SPR28	1.18	0.45748
						MFB1	1.7586	0.035283
						YDR220C	1.1624	0.59517
						GTB1	0.98235	0.9285
						YDR222W	0.78165	0.45011
						CRF1	0.95867	0.78838
						HTB1	0.35353	0.032132
						HTA1	1.2575	0.53288
						ADK1	0.27786	0.36563
						SIR4	0.61124	0.069102
						PCF11	0.54328	0.35035
						IVY1	1.1632	0.54741
						YDR230W	0.87804	0.35194
						COX20	1.1194	0.66503
						HEM1	0.30781	0.21429
						RTN1	0.82607	0.69657
						LYS4	0.87602	0.88686
						PRP42	0.67744	0.56518
						FMN1	0.86431	0.89066
						MRPL7	1.5425	0.47582
						SEC26	0.27255	0.43842
						YDR239C	0.99024	0.96333
						SNU56	1.1916	0.75039
						BUD26	0.76623	0.41479
						AMD2	1.2194	0.12478
						PRP28	0	0.30419
						PEX5	0.83494	0.38302
						MNN10	1.1601	0.75395
						TRS23	0.35361	0.070771
						YDR246W-A	0.85991	0.35568
						VHS1	1.1406	0.61227
						YDR248C	1.004	0.99122
						YDR249C	0.81731	0.27212
						YDR250C	0.94205	0.83972
						PAM1	0.90954	0.59056
						BTT1	1.3344	0.43842
						MET32	1.1403	0.71092
						CHL4	0.86142	0.64727
						RMD5	1.1742	0.60046
						CTA1	0.97625	0.90133
						RKM4	1.2377	0.58379
						HSP78	1.0681	0.82782
						YAP6	1.2752	0.24779
						SWM1	0.9794	0.85108
						EXG2	1.037	0.74562
						YDR262W	1.4205	0.23715
						DIN7	1.0613	0.69022
						AKR1	0.87764	0.83626
						PEX10	1.2626	0.43488
						HEL2	0.99023	0.96653
						CIA1	0.72248	0.7366
						MSW1	1.0334	0.95222
						YDR269C	0.70901	0.56837
						CCC2	1.2188	0.32759
						YDR271C	1.1531	0.45815
						GLO2	1.1584	0.64004
						DON1	1.4763	0.032191
						YDR274C	0.90116	0.37261
						BSC2	1.1828	0.52697
						PMP3	1.3329	0.62089
						MTH1	0.86241	0.45715
						YDR278C	1.3416	0.28022
						RNH202	1.0475	0.76893
						RRP45	3.2557	0.010613
						PHM6	1.2182	0.45142
						YDR282C	0.59246	0.097849
						GCN2	1.0347	0.84199
						DPP1	1.0916	0.58038
						ZIP1	1.0274	0.90737
						YDR286C	1.7131	0.021847
						INM2	1.5806	0.20448
						NSE3	2.3889	0.19153
						RTT103	0.92477	0.86487
						YDR290W	1.2053	0.62127
						HRQ1	1.1216	0.56761
						SRP101	0	0.38532
						SSD1	0.97579	0.86054
						DPL1	0.036042	0.0012324
						HDA2	1.2862	0.269
						MHR1	1.5774	0.1007
						SUR2	1.5618	0.38206
						ATP5	1.0728	0.90151
						BFR2	0.88304	0.89789
						PRO1	0.99326	0.98328
						CFT1	0.37964	0.48472
						GPI11	0.41696	0.37441
						RSC3	2.1969	0.15326
						CPR5	0.77173	0.46911
						HNT2	0.72301	0.27669
						YDR306C	0.86158	0.39861
						PMT7	0.97653	0.85703
						SRB7	3.9366	0.11461
						GIC2	1.1185	0.2664
						SUM1	1.0473	0.60038
						TFB1	1.148	0.68426
						SSF2	1.0039	0.98656
						PIB1	1.0218	0.84618
						RAD34	1.1674	0.27587
						IPK1	1.048	0.90978
						OMS1	1.3372	0.20624
						HIM1	0.91721	0.68571
						MCM21	1.366	0.29887
						YFT2	0.96614	0.93142
						SWA2	0.69931	0.40029
						DAD4	Inf	0.11739
						YDR320W-B	1.0494	0.83294
						ASP1	1.3137	0.24429
						MRPL35	1.2202	0.69046
						TIM11	2.9603	0.067145
						PEP7	0.57613	0.022662
						UTP4	0.74092	0.62739
						YCG1	0.8415	0.79547
						YSP2	0.96512	0.82854
						YDR327W	0.712	0.55718
						SKP1	0.96592	0.97018
						PEX3	1.2262	0.45313
						UBX5	1.0578	0.65847
						GPI8	0.89814	0.86537
						IRC3	1.8249	0.11666
						RQC1	1.0211	0.89047
						SWR1	0.94808	0.90816
						MSN5	0.77868	0.038911
						YDR336W	0.96234	0.89814
						MRPS28	1.1574	0.81837
						YDR338C	1.0066	0.95672
						FCF1	0.35415	0.2622
						YDR340W	0.935	0.77385
						YDR341C	0.78352	0.85367
						HXT7	0.95923	0.94802
						HXT6	1.8418	0.11477
						YDR344C	0.9699	0.71506
						HXT3	0.83094	0.46082
						SVF1	1.0078	0.96251
						MRP1	0.97637	0.97074
						PAL1	0.9664	0.88129
						YPS7	1.1968	0.24559
						ATP22	1.8542	0.021575
						SBE2	1.0295	0.92184
						YPQ2	1.2181	0.16531
						TRR1	1.5204	0.4453
						TRP4	1.4399	0.28959
						YDR354C-A	0.67957	0.79511
						YDR355C	NaN	NaN
						SPC110	1.0317	0.95308
						CNL1	1.0345	0.84246
						GGA1	1.2139	0.59243
						EAF1	1.1934	0.47773
						OPI7	1.4592	0.36368
						BCP1	0.78698	0.85616
						TFC6	0.63095	0.36111
						ESC2	1.5745	0.078179
						SEM1	1.3532	0.5964
						CDC40	0.87719	0.86361
						ESF1	1.1838	0.7938
						YDR366C	0.89058	0.38034
						KEI1	1.108	0.86949
						YPR1	0.98764	0.94843
						XRS2	0.68293	0.00012577
						DXO1	1.1217	0.37878
						CTS2	1.2995	0.18868
						YDR371C-A	2.5004	0.41538
						VPS74	1.4089	0.60057
						FRQ1	0	0.21384
						PHO92	1.0552	0.74592
						WIP1	1.0159	0.99313
						BCS1	1.3318	0.44852
						ARH1	0.64752	0.31816
						ATP17	1.7424	0.062902
						LSM6	0.90029	0.93708
						RGA2	0.97936	0.89778
						SDH6	1.5269	0.033177
						ARO10	1.1673	0.45158
						YRA1	0.56854	0.46092
						YDR381C-A	0.20105	0.16299
						RPP2B	0.86013	0.75196
						NKP1	1.063	0.69557
						ATO3	0.87546	0.51259
						EFT2	2.6769	0.093895
						MUS81	1.0949	0.62802
						YDR387C	0.9055	0.55958
						RVS167	1.1044	0.73017
						SAC7	1.1708	0.39913
						UBA2	1.6508	0.13902
						YDR391C	1.1261	0.58197
						SPT3	1.4447	0.078765
						SHE9	1.2497	0.0029936
						RPT3	0	0.24749
						SXM1	1.0312	0.89515
						YDR396W	1.4184	0.31518
						NCB2	1.3443	0.39739
						UTP5	1.2687	0.50073
						HPT1	0.90269	0.80384
						URH1	1.2062	0.37921
						YDR401W	0.89199	0.45104
						DIT2	1.041	0.80049
						DIT1	1.2426	0.020399
						RPB7	0	0.57613
						MRP20	1.5993	0.15654
						PDR15	1.0027	0.98272
						YDR406W-A	1.049	0.8599
						TRS120	0.8634	0.73507
						ADE8	0	0.07656
						SIZ1	1.1233	0.45104
						STE14	1.233	0.39644
						DFM1	0.99683	0.98801
						RRP17	1.526	0.47759
						YDR413C	1.9365	0.31946
						ERD1	1.0801	0.57944
						YDR415C	0.95595	0.85582
						SYF1	0.78149	0.34742
						YDR417C	0.41575	0.31698
						RPL12B	0	0.098784
						RAD30	0.89584	0.67643
						HKR1	0.94983	0.41706
						ARO80	1.2876	0.15788
						SIP1	0.75487	0.15965
						CAD1	0.71946	0.051377
						DYN2	1.2807	0.22663
						SNX41	0.87766	0.31679
						YDR426C	0.77289	0.36126
						RPN9	1.5486	0.58534
						BNA7	1.0942	0.74928
						TIF35	1.2943	0.76535
						CYM1	1.0034	0.97508
						YDR431W	0.8521	0.14709
						NPL3	1.0712	0.93392
						YDR433W	1.1989	0.817
						GPI17	0.5686	0.22541
						PPM1	1.3637	0.15889
						PPZ2	1.1627	0.54029
						GPI19	1.0925	0.78021
						THI74	1.2213	0.20908
						LRS4	0.59715	0.35305
						DOT1	1.3286	0.31368
						APT2	1.0246	0.81871
						YDR442W	0.79744	0.62232
						SSN2	0.61787	0.45942
						YDR444W	1.1548	0.38985
						YDR445C	1.2353	0.027548
						ECM11	1.2076	0.48387
						RPS17B	1.4284	0.13582
						ADA2	1.5079	0.26554
						UTP6	0.41131	0.42231
						RPS18A	0.99683	0.99178
						YHP1	1.1307	0.33943
						PPN1	0.81511	0.27167
						TSA2	0.89148	0.34644
						GUK1	0.90235	0.93504
						YDR455C	0.74665	0.15751
						NHX1	0.8625	0.59339
						TOM1	1.0213	0.94324
						HEH2	0.86095	0.43549
						PFA5	0.90635	0.6845
						TFB3	2.3818	0.013369
						MFA1	0.59989	0.43906
						YDR461C-A	1.7768	0.1095
						MRPL28	1.5883	0.29945
						STP1	1.0598	0.87854
						SPP41	1.1444	0.70113
						YDR464C-A	0.84262	0.7399
						RMT2	0.98086	0.91261
						PKH3	0.92444	0.55369
						YDR467C	0.68792	0.13662
						TLG1	0.80814	0.68638
						SDC1	0.96613	0.92592
						UGO1	1.0982	0.90178
						RPL27B	0.99394	0.98386
						TRS31	1.3408	0.56536
						PRP3	1.2533	0.52534
						JIP4	1.1891	0.23963
						YDR476C	1.107	0.54237
						SNF1	0.46399	0.1959
						SNM1	1.0108	0.99288
						PEX29	1.3567	0.17093
						DIG2	1.0962	0.62514
						PHO8	0.96866	0.90156
						CWC21	1.1219	0.228
						KRE2	1.5651	0.025673
						VPS52	1.5219	0.2945
						VPS72	0.90051	0.55467
						VPS60	0.65626	0.044694
						RIB3	NaN	NaN
						PAC11	1.0808	0.61785
						SLD5	2.34	0.54812
						PKH1	1.0806	0.64057
						YDR491C	1.0599	0.42293
						IZH1	0.88249	0.45852
						MZM1	0.59117	0.24793
						RSM28	1.6795	0.11848
						VPS3	1.2145	0.58195
						PUF6	1.1504	0.17674
						ITR1	0.94634	0.82479
						SEC20	0.99814	0.99275
						LCD1	0.77404	0.66639
						RPL37B	1.3045	0.47114
						PLM2	1.1744	0.51845
						SAM2	1.157	0.45537
						LPP1	0.95617	0.843
						SPG3	1.765	0.098961
						PSP1	1.0369	0.83882
						GMC1	1.1949	0.30134
						GIN4	0.92528	0.57726
						GNP1	1.0012	0.99488
						YDR509W	1.1972	0.51515
						SMT3	1.7761	0.70264
						YDR510C-A	0.5294	0.38487
						SDH7	1.1901	0.41385
						EMI1	0.93618	0.55037
						GRX2	1.0554	0.82409
						YDR514C	0.99908	0.99456
						SLF1	1.1978	0.69576
						EMI2	1.3394	0.14859
						GRH1	1.138	0.35746
						EUG1	1.2534	0.32538
						FPR2	1.2483	0.58894
						URC2	0.95072	0.69492
						YDR521W	0.9319	0.83737
						SPS2	1.0428	0.86275
						SPS1	1.0711	0.71149
						AGE1	0.93301	0.73422
						YDR524W-C	1.1259	0.78426
						YDR524C-B	3.4801	0.026456
						YDR524C-A	0.87838	0.50285
						API2	0.91458	0.52938
						SNA2	1.2238	0.25745
						YDR526C	3.7839	0.15826
						RBA50	0.5144	0.20556
						HLR1	1.1157	0.14775
						QCR7	1.1623	0.54607
						APA2	1.2357	0.11162
						CAB1	1.6565	0.51841
						KRE28	1.9227	0.05003
						HSP31	1.1287	0.53015
						FIT1	1.1353	0.48234
						YDR535C	1.0949	0.62393
						STL1	1.1581	0.096026
						YDR537C	0.98212	0.96433
						PAD1	0.94981	0.88244
						FDC1	1.3044	0.38521
						IRC4	0.72367	0.27004
						YDR541C	1.1626	0.35161
						PAU10	2.5122	0.41583
						YDR543C	1.1036	0.78637
						YDR544C	2.1707	0.050316
						YRF1-1	NaN	NaN
						YDR545C-A	NaN	NaN
						YEL077C	0.73612	0.29167
						YEL077W-A	0.52807	0.37817
						YEL076C-A	NaN	NaN
						YEL076C	NaN	NaN
						YEL075W-A	0	0.21778
						YEL075C	0	0.21778
						YEL074W	1.0234	0.80151
						YEL073C	1.0565	0.82671
						RMD6	1.1026	0.59484
						DLD3	1.0168	0.91536
						DSF1	0.83066	0.27341
						HXT13	0.89143	0.55345
						YEL068C	0.94503	0.8204
						YEL067C	1.0442	0.66518
						HPA3	1.388	0.12671
						SIT1	0.94583	0.74413
						AVT2	1.1524	0.33164
						CAN1	1.0857	0.72629
						NPR2	0.68426	0.28768
						CIN8	1.0301	0.88442
						PRB1	0.98897	0.95431
						SOM1	1.0064	0.97967
						HHY1	1.0993	0.4505
						PCM1	1.0563	0.92733
						YEL057C	1.1054	0.48174
						HAT2	1.0508	0.69695
						POL5	0.9844	0.98056
						RPL12A	0.90497	0.77268
						YEL053W-A	0.94212	0.86696
						MAK10	1.0081	0.94313
						AFG1	1.3682	0.1088
						VMA8	0.5981	0.62279
						YEL050W-A	0.6162	0.28781
						RML2	1.4068	0.45582
						PAU2	1.0097	0.96292
						TCA17	0.9616	0.93712
						FRD1	0.97943	0.87918
						GLY1	2.3259	0.2062
						YEL045C	0.89448	0.5078
						IES6	1.0248	0.95966
						YEL043W	0.99196	0.90714
						GDA1	1.2513	0.10512
						YEF1	1.2261	0.21021
						UTR2	1.1055	0.30112
						CYC7	1.4903	0.05223
						UTR4	0.96093	0.73655
						RAD23	1.1841	0.38042
						ANP1	0.75419	0.091713
						UTR5	0.96503	0.68535
						YEL034C-A	0.8476	0.52995
						HYP2	1.1457	0.68061
						MTC7	1.053	0.71834
						MCM3	0.96683	0.96034
						YEL032C-A	2.0116	0.6317
						SPF1	0.86217	0.66794
						YEL030C-A	0.83024	0.58803
						ECM10	0.92923	0.52039
						BUD16	1.1913	0.29183
						YEL028W	0.94682	0.83641
						VMA3	0.70929	0.73056
						SNU13	2.6512	0.21054
						YEL025C	0.95648	0.61215
						RIP1	1.2355	0.64341
						YEL023C	0.88267	0.081831
						GEA2	0.96775	0.68308
						URA3	0.71604	0.027626
						YEL020C-B	NaN	NaN
						TIM9	1.5731	0.14533
						YEL020C	1.0942	0.1513
						MMS21	1.2906	0.15932
						YEL018C-A	1.1715	0.52856
						EAF5	1.2083	0.56832
						PMP2	1.032	0.91545
						GTT3	0.90357	0.57684
						NPP2	0.9224	0.38523
						EDC3	0.96454	0.75657
						YEL014C	1.0103	0.87584
						VAC8	1.0099	0.90903
						UBC8	0.91559	0.38658
						GLC3	0.82606	0.0019394
						YEL010W	0.74784	0.062226
						YEL009C-A	0.79197	0.04795
						GCN4	1.0899	0.54597
						YEL008W	0.84605	0.33558
						YEL008C-A	0.82816	0.45397
						MIT1	1.2322	0.12188
						YEA6	0.80583	0.061452
						VAB2	1.0372	0.76223
						YEA4	0.94765	0.4162
						GIM4	0.8446	0.029699
						WBP1	1.1041	0.60884
						IRC22	0.86132	0.076265
						MNN1	0.8501	0.036914
						NOP16	0.69203	0.26537
						PMI40	0.85983	0.76206
						FMP52	0.8821	0.22961
						YND1	0.80881	0.091071
						NUG1	0.76047	0.099516
						YER006C-A	0.91658	0.50378
						PAC2	0.8097	0.22169
						TMA20	0.83393	0.20487
						SEC3	1.107	0.17109
						NTF2	0	0.57613
						YER010C	0.82354	0.10977
						TIR1	1.0331	0.79758
						PRE1	0.91516	0.7123
						PRP22	1.0513	0.70412
						HEM14	1.3553	0.66637
						BUD25	1.0168	0.8567
						FAA2	1.0082	0.85191
						BIM1	0.98099	0.81493
						AFG3	1.3801	0.43416
						SPC25	1.2489	0.26836
						ISC1	0.68038	0.02374
						SBH2	0.95154	0.86308
						GPA2	1.0696	0.35155
						RPN3	0.95017	0.85633
						SRB4	1.6692	0.19072
						PRO3	1.9027	0.089055
						YER023C-A	NaN	NaN
						YAT2	0.99755	0.9728
						GCD11	1.6424	0.27054
						CHO1	0.5248	0.38947
						GAL83	1.0502	0.7716
						MIG3	1.1169	0.18492
						SMB1	0.90913	0.40812
						CHZ1	1.1913	0.66477
						YPT31	1.0532	0.69309
						FIR1	0.98738	0.88515
						ZRG8	1.0787	0.42783
						YER034W	1.0151	0.89495
						EDC2	0.83017	0.1147
						ARB1	0.99386	0.99183
						PHM8	0.88794	0.26728
						KRE29	1.3548	0.53883
						YER038W-A	0.80232	0.54395
						HVG1	0.88964	0.56268
						YER039C-A	1.1441	0.55116
						GLN3	1.0771	0.48359
						YEN1	0.9437	0.48874
						MXR1	0.79522	0.36797
						SAH1	0	0.23633
						ERG28	0.81264	0.75801
						MEI4	1.0215	0.89306
						ACA1	1.0836	0.49764
						SPO73	0.99707	0.98962
						YER046W-A	1.0218	0.93898
						SAP1	0.96918	0.85412
						CAJ1	1.0693	0.54097
						ISD11	0.72787	0.62593
						TPA1	1.1704	0.5312
						RSM18	0.7288	0.73234
						JHD1	0.95857	0.74689
						HOM3	1.38	0.022969
						PIC2	0.88312	0.53295
						YER053C-A	0.78709	0.8228
						GIP2	1.0689	0.51105
						HIS1	1.2206	0.11391
						FCY2	0.88787	0.40722
						RPL34A	1.1789	0.58102
						HMF1	1.0399	0.76021
						PET117	1.0102	0.97736
						PCL6	0.68493	0.061264
						FCY21	1.0561	0.64112
						FCY22	0.99035	0.94507
						CEM1	1.0302	0.7393
						GPP2	1.0314	0.57132
						THO1	0.92545	0.68701
						VHR2	1.0871	0.6525
						ICL1	1.029	0.78828
						RRT13	1.2526	0.57829
						YER066C-A	1.1989	0.61927
						RGI1	1.2411	0.38787
						YER067C-A	1.3569	0.18348
						MOT2	0.79545	0.31062
						YER068C-A	1.2701	0.10561
						ARG5%2C6	1.2985	0.51642
						RNR1	1.185	0.56928
						TDA2	1.0765	0.8508
						VTC1	1.1466	0.56034
						ALD5	1.0157	0.9278
						RPS24A	0.97475	0.97385
						YOS1	0	0.57613
						PTP3	0.74844	0.011581
						YER076C	1.026	0.80786
						YER076W-A	0.97832	0.93618
						YER077C	1.2386	0.2744
						ICP55	1.1257	0.089575
						YER078W-A	0.98685	0.94486
						YER079W	1.2456	0.29434
						YER079C-A	0.80612	0.323
						AIM9	1.068	0.72581
						SER3	1.0265	0.81782
						UTP7	1.2304	0.64877
						GET2	0.80236	0.61658
						YER084W	1.0805	0.61634
						YER084W-A	1.3695	0.38961
						YER085C	1.3695	0.38961
						ILV1	1.1742	0.77674
						AIM10	1.0991	0.88194
						YER087C-A	0.96809	0.9507
						SBH1	0.94065	0.81882
						DOT6	1.0719	0.60818
						YER088C-A	1.0936	0.18782
						YER088W-B	0.89849	0.28876
						PTC2	0.99367	0.95377
						TRP2	1.2312	0.076223
						YER090C-A	2.294	0.031249
						MET6	1.7068	0.29
						YER091C-A	1.0467	0.68313
						IES5	1.0108	0.9547
						TSC11	1.1692	0.36471
						AIM11	0.8349	0.33839
						PUP3	0	0.57613
						RAD51	1.3852	0.24253
						SHC1	1.086	0.6616
						YER097W	1.1657	0.10952
						UBP9	1.0501	0.73781
						PRS2	1.083	0.61912
						UBC6	0.82581	0.37464
						AST2	1.2076	0.30698
						RPS8B	1.0195	0.9312
						SSA4	0.92122	0.70524
						RTT105	0.8719	0.77943
						NUP157	1.1475	0.39266
						MAM1	0.95531	0.53533
						GLE2	1.4184	0.69786
						YER107W-A	1.5646	0.26789
						FLO8	0.97483	0.90099
						KAP123	0.99598	0.98673
						SWI4	0.9313	0.71748
						LSM4	0.79708	0.82757
						TMN3	0.90883	0.50679
						BOI2	1.0164	0.92959
						SPR6	1.0715	0.80385
						SLX8	0.97456	0.72545
						RPL23B	0.91272	0.9126
						SHO1	0.81763	0.4115
						AVT6	1.314	0.085093
						YER119C-A	1.1941	0.37913
						SCS2	1.2969	0.3846
						YER121W	1.197	0.34026
						GLO3	0.94067	0.68321
						YCK3	0.80322	0.47089
						DSE1	0.98458	0.89382
						RSP5	0	0.29347
						NSA2	0.56568	0.59384
						LCP5	1.948	0.23365
						VFA1	1.2012	0.53747
						SAK1	0.89088	0.38053
						COM2	0.97697	0.80186
						RPS26B	1.3038	0.28859
						PMD1	1.0596	0.5202
						GLC7	2.9905	0.041759
						YER133W-A	0.58572	0.33019
						YER134C	0.68114	0.088599
						YER135C	0.77908	0.46919
						GDI1	4.9993	0.014266
						YER137C	0.80089	0.28325
						YER137W-A	0.7692	0.36588
						YER138W-A	0.26724	0.20657
						RTR1	1.0766	0.77599
						EMP65	1.3218	0.10982
						COX15	1.3284	0.43987
						MAG1	1.0847	0.77136
						DDI1	1.241	0.028042
						UBP5	1.0724	0.39501
						FTR1	1.5624	0.13569
						YER145C-A	0.99006	0.96321
						LSM5	0.86937	0.66562
						SCC4	0.93517	0.80234
						YER147C-A	1.3117	0.61386
						SPT15	1.9409	0.25962
						YER148W-A	0.98355	0.96917
						PEA2	0.98452	0.95349
						SPI1	0.86654	0.66786
						UBP3	1.5488	0.067806
						YER152C	1.0418	0.82658
						YER152W-A	1.3312	0.31283
						PET122	1.3432	0.18519
						OXA1	1.9139	0.16566
						BEM2	0.91068	0.78486
						YER156C	1.3157	0.2212
						COG3	0.87406	0.70301
						YER158C	1.1171	0.11436
						YER158W-A	0.77557	0.33381
						BUR6	0.69902	0.46004
						SPT2	0.98112	0.92893
						RAD4	1.4099	0.10742
						GCG1	0.95052	0.83266
						CHD1	1.2889	0.20561
						PAB1	1.6731	0.42521
						YER165C-A	1.2258	0.62554
						DNF1	1.0506	0.72269
						BCK2	0.90616	0.73967
						CCA1	1.0881	0.90382
						RPH1	1.3468	0.13919
						ADK2	1.3699	0.083517
						RAD3	1.1311	0.76823
						BRR2	1.0192	0.95568
						YER172C-A	0.39962	0.23603
						RAD24	1.2932	0.32958
						GRX4	0.94283	0.70767
						TMT1	1.0022	0.98887
						YER175W-A	0.95925	0.92325
						ECM32	1.0568	0.50967
						BMH1	0.88187	0.67667
						PDA1	0.97162	0.93156
						DMC1	1.3082	0.17312
						ISC10	1.2868	0.15238
						SLO1	0.67672	0.36633
						YER181C	2.0582	0.099112
						FMP10	1.0797	0.75316
						FAU1	1.0941	0.65895
						TOG1	0.99219	0.88028
						PUG1	0.8342	0.41031
						YER186C	1.0895	0.54803
						YER187W	1.1232	0.56191
						YER188W	1.1025	0.57787
						YER188C-A	1.4924	0.042745
						YER189W	6.7117	0.047268
						YRF1-2	1.0584	0.74357
						YER190C-A	NaN	NaN
						YER190C-B	NaN	NaN
						YFL068W	NaN	NaN
						YFL067W	1.1281	0.87594
						YFL066C	0.4333	0.4395
						YFL065C	0	0.43172
						YFL064C	0.58029	0.42371
						YFL063W	1.1426	0.4361
						COS4	1.3884	0.28429
						DDI2	1.121	0.85356
						SNO3	1.109	0.78735
						SNZ3	1.0489	0.91151
						THI5	1.0861	0.8545
						AAD16	1.1428	0.20382
						AAD6	0.9815	0.91685
						AGP3	1.0877	0.35561
						YFL054C	1.0499	0.6386
						DAK2	1.2425	0.065378
						YFL052W	1.073	0.67701
						YFL051C	1.3796	0.032494
						ALR2	1.0093	0.94831
						SWP82	1.1745	0.34792
						EMP47	1.0037	0.98553
						RGD2	1.0487	0.72952
						FMP32	0.97335	0.91567
						SEC53	1.4131	0.83059
						OTU1	1.097	0.5543
						YFL042C	1.0475	0.55676
						YFL041W-A	1.62	0.094534
						FET5	0.88218	0.27819
						YFL040W	1.0928	0.40226
						ACT1	0	0.37862
						YPT1	4.3718	0.10122
						TUB2	0.40604	0.25339
						RPO41	1.3006	0.5947
						MOB2	0.83668	0.4198
						RPL22B	0.9905	0.96244
						YFL034W	1.1021	0.2987
						RIM15	0.84714	0.52877
						YFL032W	0.96365	0.84265
						HAC1	0.88331	0.39315
						YFL031C-A	0.66116	0.53663
						AGX1	0.91462	0.39823
						CAK1	1.0159	0.99313
						CAF16	1.1496	0.50643
						GYP8	1.0166	0.85044
						STE2	0.94191	0.064322
						BST1	1.0769	0.19289
						EPL1	0.74569	0.12894
						BUD27	1.1721	0.074904
						FRS2	4.2219	0.10085
						YFL021C-A	0.9349	0.41299
						GAT1	0.99811	0.98533
						PAU5	1.1774	0.62216
						YFL019C	1.3879	0.46729
						LPD1	1.0009	0.99382
						SMX2	2.642	0.064053
						GNA1	0.75077	0.52887
						MDJ1	1.2458	0.38829
						YFL015W-A	0.89487	0.63857
						YFL015C	0.86439	0.32494
						HSP12	1.144	0.53138
						YFL013W-A	0.78633	0.068718
						IES1	0.83191	0.089085
						YFL012W-A	0.96442	0.85658
						YFL012W	0.95817	0.59929
						HXT10	0.89348	0.3816
						AUA1	0.86298	0.22316
						WWM1	1.0507	0.68456
						CDC4	0.83116	0.47551
						SMC1	0.70668	0.72822
						BLM10	0.97593	0.81243
						SEC4	2.0253	0.62787
						VTC2	0.98046	0.86847
						MSH4	0.89868	0.26714
						SPB4	0.84183	0.49808
						DEG1	0.84741	0.035157
						LOC1	0.80531	0.51771
						NIC96	0.99559	0.95813
						YPI1	1.8799	0.028995
						RPN11	0.96457	0.90649
						SAD1	0.56583	0.020332
						YFR006W	0.89874	0.40105
						YFH7	1.0137	0.93815
						FAR7	1.037	0.93649
[truncated: 4,576 more rows]

## Sheet: Dpl1delONLY vs. rest
positively selected					gene	student_ttest
gene	student_ttest				YAL069W	0.32804
CDC39	0.0044584				YAL068W-A	0.66676
GLY1	0.029666				PAU8	0.68937
OXA1	0.098224				YAL067W-A	0.45643
UBP6	0.34622				SEO1	0.26797
VID30	0.066884				YAL066W	0.58677
LYS5	0.022269				YAL065C	0.22686
SRB2	0.029157				YAL064W-B	0.64583
ICE2	0.040963				TDA8	0.79545
IBA57	0.047983				YAL064W	0.20705
OPI8	0.033382				YAL063C-A	0.43543
DID2	0.010966				FLO9	0.19642
MRPL3	0.15266				GDH3	0.43728
INO4	0.0024541				BDH2	0.8769
PET123	0.036874				BDH1	0.71599
ISA2	0.18056				YAL059C-A	0.90113
negatively selected					ECM1	0.66706
gene	student_ttest				CNE1	0.013607
DPL1	0.010867				YAL056C-A	0.3223
NOP16	0.046562				GPB2	0.49342
ISC1	0.0085392				PEX22	0.15179
HIP1	0.02669				ACS1	0.60078
MTC6	0.051324				FLC2	0.18392
CSF1	0.018911				OAF1	0.37866
ECM30	0.099556				AIM2	0.1947
UBP15	0.11595				GEM1	0.78363
YNL010W	0.00048916				YAL047W-A	0.38676
					SPC72	0.53432
					AIM1	0.76127
					YAL045C	0.14355
					YAL044W-A	0.59749
					GCV3	0.15702
					PTA1	0.30003
					YAL042C-A	0.69294
					ERV46	0.8999
					CDC24	0.90121
					CLN3	0.74266
					CYC3	0.61423
					CDC19	0.12201
					YAL037C-B	0.11779
					YAL037C-A	0.7571
					YAL037W	0.020902
					RBG1	0.83269
					FUN12	0.051169
					YAL034C-B	0.61681
					MTW1	0.34992
					FUN19	0.13015
					POP5	0.23856
					PRP45	0.33494
					YAL031W-A	0.92272
					GIP4	0.69402
					SNC1	0.05886
					MYO4	0.75394
					FRT2	0.36868
					SAW1	0.92055
					YAL026C-A	0.7973
					DRS2	0.53726
					MAK16	0.26293
					LTE1	0.72475
					PMT2	0.27649
					FUN26	0.81959
					CCR4	0.25206
					ATS1	0.47818
					YAL019W-A	0.06241
					FUN30	0.6135
					LDS1	0.85264
					PSK1	0.69188
					YAL016C-B	0.65901
					YAL016C-A	0.58033
					TPD3	0.47269
					NTG1	0.41569
					SYN8	0.26661
					DEP1	0.93821
					CYS3	0.59146
					SWC3	0.97233
					MDM10	0.74976
					SPO7	0.43915
					FUN14	0.97892
					ERP2	0.27841
					SSA1	0.9695
					YAL004W	0.61238
					EFB1	0.47796
					VPS8	0.47953
					TFC3	0.13762
					NUP60	0.024215
					ERP1	0.11077
					SWD1	0.12467
					RFA1	0.12657
					SEN34	0.84351
					BUD14	0.36865
					ADE1	0.76989
					KIN3	0.75946
					CDC15	0.49196
					YAR019W-A	0.20329
					PAU7	0.21875
					YAR023C	0.32765
					UIP3	0.69885
					YAR028W	0.86823
					YAR029W	0.66163
					YAR030C	0.26153
					PRM9	0.38016
					MST28	0.47825
					YAT1	0.95169
					YAR035C-A	0.85658
					SWH1	0.23514
					YAR047C	0.040711
					FLO1	0.38301
					YAR053W	0.63766
					YAR060C	NaN
					YAR064W	0.16908
					YAR066W	0.87183
					YAR068W	0.85141
					YAR069C	NaN
					YAR070C	0.80537
					PHO11	0.029889
					IMD1	0.69709
					YAR075W	0.23302
					YBL113C	0.96365
					YBL113W-A	0.67623
					YBL112C	NaN
					YBL111C	0.58831
					YBL109W	0.89942
					PAU9	0
					YBL108W	0.4309
					YBL107W-A	0.99042
					MIX23	0.20727
					SRO77	0.50128
					PKC1	0.88725
					SEA4	0.61184
					RTG3	0.071595
					SFT2	0.78261
					ECM21	0.12911
					YBL100W-C	0.34658
					YBL100C	0.17795
					ATP1	0.12185
					BNA4	0.66933
					BRN1	0.44645
					YBL096C	0.96519
					YBL095W	0.76901
					YBL094C	0.42904
					ROX3	0.0047643
					RPL32	0.704
					SCS22	0.26255
					MAP2	0.64572
					MRP21	0.27518
					AVT5	0.72122
					TEL1	0.0015269
					RPL23A	0.63334
					YBL086C	0.0058119
					BOI1	0.48756
					CDC27	0.80514
					YBL083C	0.27353
					ALG3	0.037868
					YBL081W	0.082067
					PET112	0.34581
					NUP170	0.96791
					ATG8	0.46333
					YBL077W	0.38356
					ILS1	0.069429
					SSA3	0.98489
					AAR2	0.90421
					YBL073W	0.85989
					RPS8A	0.29033
					YBL071C-B	0.32771
					KTI11	0.84587
					YBL071C	0.44206
					YBL070C	0.41784
					AST1	0.72778
					YBL068W-A	0.79887
					PRS4	0.84253
					UBP13	0.67105
					SEF1	0.10892
					YBL065W	0.57279
					PRX1	0.75579
					KIP1	0.5148
					YBL062W	0.96788
					SKT5	0.65257
					YEL1	0.26771
					CMC2	0.19203
					YBL059W	0.6386
					SHP1	0.46877
					PTH2	0.5665
					PTC3	0.10719
					YBL055C	0.77549
					TOD6	0.45421
					YBL053W	0.056869
					SAS3	0.064186
					PIN4	0.93676
					SEC17	0.045162
					MOH1	0.25488
					RRT1	0.8693
					EDE1	0.13079
					PSY4	0.059781
					COR1	0.62544
					YBL044W	0.63887
					ECM13	0.8996
					FUI1	0.59437
					PRE7	0.2792
					ERD2	0.72202
					YBL039W-B	0.93483
					URA7	0.034175
					YBL039C-A	0.87603
					MRPL16	0.22158
					APL3	0.67767
					YBL036C	0.78943
					POL12	0.82685
					STU1	0.1241
					RIB1	0.28997
					HEK2	0.39097
					SHE1	0.69352
					PET9	0.6957
					YBL029C-A	0.6202
					YBL029W	0.68306
					YBL028C	0.38989
					RPL19B	0.95526
					LSM2	0.12258
					RRN10	0.80795
					NCL1	0.89049
					MCM2	0.48915
					PIM1	0.89617
					HAP3	0.27959
					RFT1	0.94461
					APN2	0.70981
					POP8	0.37719
					PEP1	0.87053
					FUS3	0.48231
					ACH1	0.33175
					RRN6	0.72182
					FMT1	0.47493
					YBL012C	0.46315
					SCT1	0.62381
					YBL010C	0.0030847
					ALK2	0.074234
					YBL008W-A	0.72447
					HIR1	0.21429
					SLA1	0.39718
					LDB7	0.84152
					YBL006W-A	0.71129
					PDR3	0.42126
					UTP20	0.57821
					HTA2	0.69264
					HTB2	0.082994
					ECM15	0.2552
					NTH2	0.040617
					RER2	0.42133
					COQ1	0.90314
					GPI18	0.94261
					RCR1	0.27486
					UGA2	0.26417
					DSF2	0.12418
					FLR1	0.44463
					HHF1	0.52839
					HHT1	0.024794
					IPP1	0.12003
					YBR012C	0.83285
					YBR013C	0.56745
					GRX7	0.94712
					MNN2	0.80634
					YBR016W	0.54081
					KAP104	0.60814
					GAL7	0.66779
					GAL10	0.57021
					GAL1	0.35111
					FUR4	0.99552
					POA1	0.51201
					CHS3	0.47324
					SCO2	0.15976
					OLA1	0.85335
					ETR1	0.97109
					YBR027C	0.63573
					YPK3	0.16748
					CDS1	0.78072
					RKM3	0.074509
					RPL4A	0.77789
					YBR032W	0.42074
					EDS1	0.74015
					HMT1	0.92347
					PDX3	0.64688
					CSG2	0.40377
					SCO1	0.74671
					CHS2	0.65266
					ATP3	0.93561
					FIG1	0.51123
					FAT1	0.64898
					CST26	0.32854
					QDR3	0.40929
					TCM62	0.1412
					GIP1	0.60313
					ZTA1	0.35646
					FMP23	0.15255
					RPS11B	0.9774
					REB1	0.88683
					REG2	0.36461
					YBR051W	0.83123
					RFS1	0.97874
					YBR053C	0.98639
					YRO2	0.54582
					PRP6	0.82827
					YBR056W	0.88491
					YBR056W-A	0.52379
					YBR056C-B	0.3552
					MUM2	0.77793
					UBP14	0.61684
					TSC3	0.15276
					AKL1	0.91665
					ORC2	0.89878
					TRM7	0.49053
					YBR062C	0.83944
					YBR063C	0.61574
					YBR064W	0.064665
					ECM2	0.34966
					NRG2	0.14995
					TIP1	0.28287
					BAP2	0.64504
					TAT1	0.85249
					ALG14	0.704
					YBR071W	0.51982
					HSP26	0.79723
					YBR072C-A	0.62497
					RDH54	0.79872
					PFF1	0.83361
					ECM8	0.68994
					YBR076C-A	0.75387
					SLM4	0.79603
					ECM33	0.0073357
					RPG1	0.0019064
					SEC18	0.48561
					SPT7	0.096703
					UBC4	0.61182
					TEC1	0.79494
					MIS1	0.047549
					RPL19A	0.7818
					AAC3	0.48832
					YBR085C-A	0.29667
					IST2	0.70991
					RFC5	0.41217
					POL30	0.55729
					YBR089W	0.704
					NHP6B	0.99744
					YBR090C	0.7731
					TIM12	NaN
					PHO3	0.43405
					PHO5	0.92715
					PBY1	0.99569
					RXT2	0.95155
					YBR096W	0.73581
					VPS15	0.002268
					MMS4	0.2702
					YBR099C	0.18806
					FES1	0.85751
					EXO84	0.91623
					SIF2	0.14136
					YBR103C-A	0.47605
					YMC2	0.67233
					VID24	0.96083
					PHO88	0.97876
					IML3	0.85216
					AIM3	0.32531
					CMD1	0.704
					YBR109W-A	0.9695
					ALG1	0.60029
					YSA1	0.27261
					SUS1	0.72737
					CYC8	0.32985
					YBR113W	0.099872
					RAD16	0.96219
					LYS2	0.1892
					YBR116C	0.68639
					TKL2	0.98831
					TEF2	0.75542
					MUD1	0.61776
					CBP6	0.37423
					GRS1	0.704
					YBR121C-A	NaN
					MRPL36	0.96815
					TFC1	0.86336
					YBR124W	0.78096
					PTC4	0.051749
					TPS1	0.6914
					YBR126W-A	0.87922
					YBR126W-B	0.78508
					VMA2	0.88534
					ATG14	0.69718
					OPY1	0.97627
					SHE3	0.050954
					CCZ1	0.19233
					YBR131C-A	0
					AGP2	0.12246
					HSL7	0.82452
					YBR134W	0.6255
					CKS1	0.41684
					MEC1	0.31866
					YBR137W	0.49016
					YBR138C	0.12109
					YBR139W	0.95186
					IRA1	0.26732
					BMT2	0.50437
					YBR141W-A	0.85678
					MAK5	0.59081
					SUP45	0.704
					YBR144C	0.49965
					ADH5	0.44268
					MRPS9	0.91778
					RTC2	0.061327
					YSW1	0.55725
					ARA1	0.12113
					TBS1	0.44164
					APD1	0.83234
					SPP381	0.58476
					RIB7	0.39217
					RPB5	0.54291
					CNS1	0.60294
					SLI15	0.54013
					ICS2	0.89147
					AMN1	0.53122
					IFA38	0.35326
					CDC28	0.5332
					CSH1	0.71522
					TOS1	0.68332
					YSY6	0.89698
					EXO5	0.50508
					ARL1	0.62322
					UBS1	0.23611
					TYR1	0.53526
					POP7	0.704
					PEX32	0.66819
					SSE2	0.33064
					NPL4	0.23187
					SEC66	0.080439
					SMY2	0.56008
					UMP1	0.78043
					YBR174C	0.31325
					SWD3	0.52987
					ECM31	0.63524
					EHT1	0.72311
					YBR178W	0.52067
					FZO1	0.29114
					DTR1	0.63758
					RPS6B	0.91662
					SMP1	0.25461
					YBR182C-A	0.24128
					YPC1	0.96838
					YBR184W	0.66818
					MBA1	0.0015325
					PCH2	0.98426
					GDT1	0.81763
					NTC20	0.29449
					RPS9B	0.62104
					YBR190W	0.43727
					RPL21A	0.7933
					YBR191W-A	0.59557
					RIM2	0.1574
					MED8	0.76527
					AIM4	0.57775
					MSI1	0.50062
					PGI1	0.704
					YBR196C-A	0.2564
					YBR196C-B	0.4693
					YBR197C	0.42962
					TAF5	0.010479
					KTR4	0.12966
					BEM1	0.070518
					YBR200W-A	0.11698
					DER1	0.52939
					YBR201C-A	0.20515
					MCM7	0.012671
					COS111	0.59667
					LDH1	0.9726
					KTR3	0.86952
					YBR206W	0.76954
					FTH1	0.88028
					DUR1%2C2	0.506
					YBR209W	0.98729
					ERV15	0.28309
					AME1	0.42559
					NGR1	0.77282
					MET8	0.81916
					SDS24	0.12525
					HPC2	0.39237
					YBP1	0.3329
					ATG12	0.78953
					PYC2	0.95321
					YBR219C	0.12587
					YBR220C	0.70625
					PDB1	0.48253
					YBR221W-A	0.34305
					PCS60	0.34246
					TDP1	0.65522
					YBR223W-A	0.46035
					YBR224W	0.85838
					YBR225W	0.59562
					YBR226C	0.88544
					MCX1	0.81649
					SLX1	0.003871
					ROT2	0.20991
					OM14	0.30312
					YBR230W-A	0.81613
					SWC5	0.97408
					YBR232C	0.052809
					PBP2	0.34249
					DAD3	0.5427
					ARC40	0
					VHC1	0.93456
					ABD1	0.7088
					PRP5	0.49349
					YBR238C	0.19178
					ERT1	0.32988
					THI2	0.14371
					YBR241C	0.79533
					YBR242W	0.68612
					ALG7	0.16667
					GPX2	0.31897
					ISW1	0.44154
					RRT2	0.14364
					ENP1	0.54493
					HIS7	0.10864
					ARO4	0.62483
					SPO23	0.96237
					MRPS5	0.45318
					DUT1	0.0051671
					SRB6	0.14517
					TRS20	0.39018
					MTC4	0.69855
					YBR255C-A	0.0028319
					RIB5	0.74223
					POP4	0.54148
					SHG1	0.27468
					YBR259W	0.86021
					RGD1	0.79854
					TAE1	0.35173
					MIC12	0.90989
					SHM1	0.91936
					YPT10	0.71265
					TSC10	0.19819
					REI1	0.60603
					SLM6	0.79792
					MRPL37	0.88401
					FMP21	0.24622
					BIT2	0.12879
					EFM2	0.0081286
					HSM3	0.47876
					UBX7	0.42757
					CHK1	0.94888
					RIF1	0.09578
					PPS1	0.27884
					YBR277C	0.87681
					DPB3	0.14493
					PAF1	0.83023
					SAF1	0.47883
					DUG2	0.60056
					MRPL27	0.34203
					SSH1	0.65798
					YBR284W	0.78137
					YBR285W	0.37034
					APE3	0.89739
					YBR287W	0.83711
					APM3	0.61302
					SNF5	0.81681
					BSD2	0.22786
					CTP1	0.48392
					YBR292C	0.31196
					VBA2	0.085322
					SUL1	0.065369
					PCA1	0.57139
					PHO89	0.016392
					YBR296C-A	0.74338
					MAL33	0.57828
					MAL31	0.37182
					YBR298C-A	0.89903
					MAL32	0.42149
					YBR300C	0.59549
					PAU24	0.28742
					COS2	0.54291
					YCL076W	0.75336
					GEX1	0.41437
					VBA3	0.57122
					YCL068C	0.52201
					HMLALPHA2	NaN
					HMLALPHA1	NaN
					YCL065W	NaN
					CHA1	0.36655
					VAC17	0.49942
					MRC1	0.092681
					KRR1	0.13711
					FYV5	0.53241
					ADF1	0.58255
					MIC10	0.44254
					PRD1	0.56154
					PEX34	0.76807
					KAR4	0.37735
					SPB1	0.019395
					PBN1	0.29663
					LRE1	0.65387
					APA1	0.21754
					YCL049C	0.26684
					YCL048W-A	0.51317
					SPS22	0.60113
					POF1	0.75353
					EMC1	0.42874
					YCL046W	0.74928
					MGR1	0.3342
					PDI1	0.5829
					YCL041C	0.97651
					YCL042W	0.20647
					GLK1	0.92213
					GID7	0.32781
					ATG22	0.47955
					SRO9	0.1109
					GFD2	0.6953
					GRX1	0.84732
					LSB5	0.24403
					MXR2	0.59855
					STE50	0.048463
					RRP7	0.65005
					HIS4	0.010559
					BIK1	0.9568
					RNQ1	0.36058
					FUS1	0.5412
					HBN1	0.83971
					FRM2	0.34009
					AGP1	0.22163
					YCL023C	0.3723
					KCC4	0.038816
					YCL022C	0.33482
					YCL021W-A	0.32355
					LEU2	NaN
					NFS1	0.46108
					DCC1	0.48586
					BUD3	0.083882
					YCL012C	0.44825
					GBP2	0.87729
					SGF29	0.89143
					ILV6	0.34465
					STP22	0.044938
					YCL007C	0.45862
					VMA9	0.36611
					LDB16	0.68633
					PGS1	0.55179
					YCL002C	0.71528
					RER1	0.89715
					YCL001W-A	0.96428
					YCL001W-B	0.59599
					YCR001W	0.012283
					CDC10	0.32478
					MRPL32	0.98564
					YCP4	0.54393
					CIT2	0.42109
					YCR006C	0.50236
					YCR007C	0.6462
					SAT4	0.98992
					RVS161	0.6677
					ADY2	0.79999
					ADP1	0.60527
					PGK1	0.21842
					YCR013C	0.26027
					POL4	0.6336
					YCR015C	0.37232
					YCR016W	0.33844
					CWH43	0.71695
					SRD1	0.67015
					YCR018C-A	0.53938
					MAK32	0.53241
					PET18	0.45863
					MAK31	0.63742
					HTL1	0.53248
					HSP30	0.45418
					YCR022C	0.73303
					YCR023C	0.95971
					SLM5	0.45472
					YCR024C-B	0.80074
					PMP1	0.57875
					YCR025C	0.16777
					NPP1	0.28621
					RHB1	0.75475
					FEN2	0.91446
					RIM1	0.25856
					SYP1	0.71796
					RPS14A	0.84802
					BPH1	0.519
					SNT1	0.35162
					ELO2	0.8698
					RRP43	0.38585
					RBK1	0.44061
					PHO87	0.28721
					BUD5	0.33387
					YCR038W-A	0.20924
					MATALPHA2	0.68579
					MATALPHA1	NaN
					YCR041W	0.27511
					TAF2	0.46174
					YCR043C	0.95443
					PER1	0.1667
					RRT12	0.74424
					YCR045W-A	0.87241
					IMG1	0.65153
					BUD23	0.43325
					YCR047W-A	0.85054
					YCR049C	0.51052
					ARE1	0.83557
					YCR050C	0.7924
					YCR051W	0.34377
					RSC6	0.01643
					THR4	0.226
					CTR86	0.82431
					PWP2	0.6323
					YIH1	0.18461
					TAH1	0.30296
					YCR061W	0.017953
					YCR064C	0.68998
					BUD31	0.85323
					HCM1	0.3862
					RAD18	0.26274
					SED4	0.012195
					ATG15	0.99501
					CPR4	0.19362
					IMG2	0.40267
					RSA4	NaN
					SSK22	0.49962
					SOL2	0.89746
					ERS1	0.33301
					YCR075W-A	0.9889
					FUB1	0.48896
					PAT1	0.15191
					PTC6	0.06883
					SRB8	0.73992
					YCR081C-A	0.96265
					AHC2	0.4467
					TRX3	0.27407
					TUP1	0.098176
					YCR085W	0.25788
					CSM1	0.064856
					YCR087W	0.38339
					YCR087C-A	0.90476
					ABP1	0.79238
					FIG2	0.98143
					YCR090C	0.69735
					KIN82	0.55064
					MSH3	0.075362
					CDC39	0.0044584
					CDC50	0.96611
					OCA4	0.31294
					YCR095W-A	0.57787
					HMRA2	NaN
					HMRA1	0.21833
					YCR097W-A	0.29301
					GIT1	0.30574
					YCR099C	0.82809
					YCR100C	0.01919
					YCR101C	0.3383
					YCR102C	0.34898
					YCR102W-A	0.97331
					PAU3	0.93022
					ADH7	0.78056
					RDS1	0.36129
					AAD3	0.36941
					YCR108C	0.65115
					COS7	0.90676
					YDL247W-A	0.704
					MPH2	0.26186
					SOR2	0.69017
					HXT15	0.12426
					THI13	0.87606
					AAD4	0.82089
					YDL242W	0.15368
					YDL241W	0.15636
					YDL240C-A	0.1424
					LRG1	0.18882
					ADY3	0.25249
					GUD1	0.50226
					AIM6	0.084841
					PHO13	0.053574
					YPD1	0.27511
					GYP7	0.86361
					MFG1	0.73635
					OST4	0.704
					BRE4	0.10275
					PTP1	0.27466
					SSB1	0.54428
					YDL228C	0.3636
					HO	0.58153
					GCS1	0.71589
					SHS1	0.73131
					WHI4	0.13567
					HBT1	0.11756
					FMP45	0.26444
					YDL221W	0.32034
					CDC13	0.52594
					DTD1	0.69694
					YDL218W	0.57133
					TIM22	0.021983
					RRI1	0.015664
					GDH2	0.96203
					PRR2	0.83878
					NOP6	0.6415
					SHR3	0.88032
					YDL211C	0.10727
					UGA4	0.94322
					CWC2	0.32101
					NHP2	0.42073
					GLE1	0.88057
					YDL206W	0.35841
					HEM3	0.87791
					RTN2	0.046424
					ACK1	0.80217
					MRPL11	0.31996
					TRM8	0.4663
					MGT1	0.81601
					YDL199C	0.83479
					GGC1	0.71243
					ASF2	0.71837
					YDL196W	0.81801
					SEC31	0.25466
					SNF3	0.050029
					NUS1	0.12775
					ARF1	0.33619
					RPL35A	0.67115
					UFD2	0.34049
					RBS1	0.70493
					PPH22	0.21828
					YDL187C	0.21013
					YDL186W	0.30336
					YDL185C-A	0.19774
					VMA1	0.6652
					RPL41A	0.704
					YDL183C	0.31312
					LYS20	0.23721
					INH1	0.44901
					YDL180W	0.49808
					PCL9	0.9566
					DLD2	0.3887
					YDL177C	0.74541
					YDL176W	0.8541
					AIR2	0.65966
					DLD1	0.97212
					PAR32	0.3102
					YDL172C	0.7469
					GLT1	0.22862
					UGA3	0.23431
					UGX2	0.78046
					SFA1	0.75711
					NRP1	0.12198
					FAP7	0.20466
					CDC36	0.52491
					CDC9	0.75229
					YDL163W	0.73803
					YDL162C	0.71732
					ENT1	0.86871
					MHF2	0.36812
					DHH1	0.64031
					YDL159W-A	0.93727
					STE7	0.79952
					YDL159C-B	0.398
					YDL158C	0.9704
					YDL157C	0.84972
					CMR1	0.69576
					CLB3	0.91793
					MSH5	0.24902
					SAS10	0.54463
					YDL152W	0.63816
					BUD30	0.69244
					RPC53	0.74805
					ATG9	0.21325
					NOP14	0.1265
					RPN5	0.18449
					LDB17	0.48139
					COP1	0.87445
					YDL144C	0.50041
					CCT4	0.55095
					CRD1	0.51452
					BPL1	0.75956
					RPO21	0.76518
					SCM3	0.011023
					RGT2	0.81075
					ARF2	0.74182
					RPL35B	0.38514
					RDI1	0.95913
					PPH21	0.7663
					RPL41B	0.58744
					SRF1	0.99722
					CDC53	0.29269
					LYS21	0.20021
					STF1	0.83538
					RPP1B	0.82683
					YDL129W	0.79334
					VCX1	0.79348
					PCL2	0.94042
					CDC48	0.78768
					HNT1	0.67163
					YDL124W	0.26763
					SNA4	0.6872
					UBP1	0.80594
					YDL121C	0.8022
					YFH1	0.2792
					YDL119C	0.17996
					YDL118W	0.51807
					CYK3	0.12851
					NUP84	0.1118
					IWR1	0.63252
					YDL114W-A	0.704
					YDL114W	0.63083
					ATG20	0.44705
					TRM3	0.10276
					RRP42	0.67623
					TMA17	0.89699
					YDL109C	0.13501
					KIN28	0.9189
					MSS2	0.77834
					PHO2	0.61924
					NSE4	0.33203
					QRI7	0.708
					QRI1	0.57174
					POL3	0.011181
					DUN1	0.86217
					GET3	0.044434
					BUG1	0.68987
					SNU23	0.093262
					RPN6	0.72715
					OPI6	0.48501
					PMT1	0.59891
					YDL094C	0.96179
					PMT5	0.074007
					SRP14	0.43802
					UBX3	0.42532
					RAM1	0.94303
					NUR1	0.61208
					ASM4	0.55607
					LUC7	0.27126
					YDL086W	0.72449
					YDL086C-A	0.88053
					YDL085C-A	0.60343
					NDE2	0.92843
					SUB2	0.50974
					RPS16B	0.055694
					RPL13A	0.75959
					RPP1A	0.29008
					THI3	0.94102
					MRK1	0.60468
					MDH3	0.68047
					VAM6	0.48349
					RXT3	0.3453
					RPL31A	0.43282
					BRE1	0.9189
					YDL073W	0.076287
					YET3	0.45318
					YDL071C	0.76375
					BDF2	0.71382
					CBS1	0.10262
					YDL068W	0.43984
					COX9	0.95991
					IDP1	0.89092
					PEX19	0.21012
					UBC9	0.704
					SYO1	0.41696
					YDL062W	0.62829
					RPS29B	0.59155
					TSR1	0.5262
					RAD59	0.94872
					USO1	0.81989
					YDL057W	0.49099
					MBP1	0.9601
					PSA1	0.48589
					MCH1	0.89271
					PBP4	0.029138
					SLC1	0.29925
					LHP1	0.4019
					YDL050C	0.32372
					KNH1	0.45954
					STP4	0.89106
					SIT4	0.047665
					NPC2	0.74413
					MRP10	0.42777
					FAD1	0.95564
					MTF2	0.72832
					PRP11	0.25688
					SIR2	0.46043
					YDL041W	0.79193
					NAT1	0.076142
					PRM7	0.54849
					BSC1	0.78481
					PUS9	0.94385
					GPR1	0.51992
					YDL034W	0.25679
					SLM3	0.67296
					YDL032W	0.43599
					DBP10	0.0377
					PRP9	0.6532
					ARP2	0.94328
					MPS1	0.59325
					YDL027C	0.24833
					YDL026W	0.83274
					RTK1	0.19984
					YDL025W-A	0.03256
					DIA3	0.6794
					YDL022C-A	0.70537
					YDL023C	0.30159
					GPD1	0.4281
					GPM2	0.53737
					RPN4	0.24231
					OSH2	0.98133
					ERP3	0.16186
					CDC7	0.68767
					YDL016C	0.77163
					TSC13	0.5427
					NOP1	0.5427
					SLX5	0.7894
					YDL012C	0.030637
					YDL011C	0.090929
					GRX6	0.27188
					YDL009C	0.8687
					APC11	0.080165
					YDL007C-A	0.48393
					RPT2	0.74824
					PTC1	0.94582
					MED2	0.17926
					ATP16	0.86539
					MCD1	0.60278
					NHP10	0.073725
					RMD1	0.20358
					NTH1	0.070731
					YRB1	0.58434
					RCR2	0.56073
					YDR003W-A	0.82645
					RAD57	0.93796
					MAF1	0.41597
					SOK1	0.035783
					TRP1	0.48097
					YDR008C	0.70848
					GAL3	0.59474
					YDR010C	0.2375
					SNQ2	0.65111
					RPL4B	0.22783
					PSF1	0.31233
					RAD61	0.022493
					HED1	0.98357
					YDR015C	0.73829
					DAD1	0.78277
					KCS1	0.9644
					YDR018C	0.12243
					GCV1	0.19736
					DAS2	0.12208
					FAL1	0.27243
					ATG31	0.88299
					SES1	0.42301
					FYV1	0.62416
					RPS11A	0.1205
					NSI1	0.82714
					VPS54	0.99234
					REG1	0.59538
					YDR029W	0.39669
					RAD28	0.80387
					MIX14	0.60127
					PST2	0.96291
					MRH1	0.60681
					LYS14	0.61706
					YDR034C-A	0.025481
					YDR034W-B	0.84658
					ARO3	0.86249
					EHD3	0.23603
					KRS1	0.43017
					ENA5	0.26838
					ENA2	0.28467
					ENA1	0.45397
					RSM10	0.68453
					YDR042C	0.80096
					NRG1	0.83433
					HEM13	0.704
					RPC11	0.4101
					BAP3	0.26395
					HEM12	0.29086
					YDR048C	0.9732
					VMS1	0.23791
					TPI1	0.28644
					DET1	0.52326
					DBF4	0.79181
					YDR053W	NaN
					CDC34	0.76003
					PST1	0.96311
					YDR056C	0.42877
					YOS9	0.98828
					TGL2	0.51581
					UBC5	0.77631
					MAK21	0.8923
					YDR061W	0.56972
					LCB2	0.7284
					AIM7	0.69297
					RPS13	0.55729
					RRG1	0.55787
					RTR2	0.89053
					OCA6	0.70578
					DOS2	0.08458
					DOA4	0.84171
					FMP16	0.95398
					PAA1	0.59654
					IPT1	0.86504
					SNF11	0.54042
					TPS2	0.59289
					PPH3	0.74807
					RAD55	0.93037
					SED1	0.65565
					SHU2	0.85958
					PET100	0.60171
					TFB5	0.86448
					VPS41	0.52549
					PDC2	0.36
					STN1	0.78405
					RRP8	0.11262
					TVP23	0.92456
					AFR1	0.8228
					SSS1	0.78836
					RRP1	0.98359
					SLU7	0.15119
					YDR089W	0.61693
					YDR090C	0.55171
					RLI1	NaN
					UBC13	0.48983
					DNF2	0.24613
					YDR094W	0.30142
					YDR095C	0.1191
					GIS1	0.85738
					MSH6	0.14617
					GRX3	0.25409
					BMH2	0.65675
					TVP15	0.52287
					ARX1	0.49236
					YDR102C	0.2201
					STE5	0.8326
					SPO71	0.47811
					TMS1	0.88724
					ARP10	0.81738
					TMN2	0.91229
					TRS85	0.59931
					YDR109C	0.81778
					FOB1	0.44003
					ALT2	0.99418
					IRC2	0.55165
					PDS1	0.072066
					YDR114C	0.19642
					YDR115W	0.66256
					MRPL1	0.59076
					TMA64	0.016159
					APC4	0.02189
					YDR118W-A	0.49842
					VBA4	0.72139
					COX26	0.60642
					TRM1	0.60608
					DPB4	0.9452
					KIN1	0.74899
					INO2	0.67108
					YDR124W	0.42091
					ECM18	0.6285
					SWF1	0.64061
					ARO1	0.33084
					MTC5	0.5733
					SAC6	0.23111
					FIN1	0.011954
					YDR131C	0.040462
					YDR132C	0.74693
					YDR133C	0.85148
					YCF1	0.4649
					VPS61	0.55881
					RGP1	0.31705
					HPR1	0.93669
					RUB1	0.40772
					MTQ2	0.32069
					DOP1	0.98999
					PEX7	0.96072
					SAN1	0.31701
					MKC7	0.085696
					TAF12	0.65288
					SWI5	0.37079
					EKI1	0.72781
					KGD2	0.1921
					YDR149C	0.52204
					NUM1	0.7621
					CTH1	0.58756
					GIR2	0.56629
					ENT5	0.80673
					YDR154C	0.61355
					CPR1	0.58674
					RPA14	0.36223
					YDR157W	0.60235
					HOM2	0.92093
					SAC3	0.22734
					SSY1	0.38224
					YDR161W	0.54046
					NBP2	0.55926
					CWC15	0.34035
					SEC1	0.63735
					TRM82	0.94654
					SEC5	0.17754
					TAF10	0.59486
					CDC37	0.94798
					STB3	0.70251
					YDR169C-A	0.39959
					SEC7	0.70596
					HSP42	0.58097
					SUP35	0.28664
					ARG82	0.045017
					HMO1	0.060445
					RSM24	0.21476
					NGG1	0.53566
					UBC1	0.58831
					SDH4	0.44465
					CSN9	0.41369
					YDR179W-A	0.97945
					SCC2	0.38822
					SAS4	0.94891
					CDC1	0.37581
					YDR182W-A	0.14753
					PLP1	0.58467
					YDR183C-A	0.61952
					ATC1	0.92054
					UPS3	0.95729
					YDR186C	0.71242
					YDR187C	0.92721
					CCT6	0.7184
					SLY1	0.72051
					RVB1	0.704
					HST4	0.74829
					NUP42	0.30278
					YDR193W	0.76926
					MSS116	0.50624
					YDR194W-A	0.50613
					REF2	0.47509
					CAB5	0.60698
					CBS2	0.42719
					RKM2	0.85368
					YDR199W	0.29983
					VPS64	0.025134
					SPC19	0.40898
					RAV2	0.38888
					YDR203W	0.96803
					COQ4	0.18215
					MSC2	0.9246
					EBS1	0.39492
					UME6	0.83762
					MSS4	0.27114
					YDR209C	0.15073
					YDR210W	0.24281
					GCD6	0.80135
					TCP1	0.54148
					UPC2	0.87666
					AHA1	0.74093
					YDR215C	0.14433
					ADR1	0.80576
					RAD9	0.0831
					SPR28	0.77798
					MFB1	0.18784
					YDR220C	0.85547
					GTB1	0.47082
					YDR222W	0.58717
					CRF1	0.77622
					HTB1	0.15705
					HTA1	0.44029
					ADK1	0.57486
					SIR4	0.21308
					PCF11	0.65261
					IVY1	0.7093
					YDR230W	0.91348
					COX20	0.67438
					HEM1	0.59766
					RTN1	0.68092
					LYS4	0.77022
					PRP42	0.65418
					FMN1	0.74143
					MRPL7	0.51874
					SEC26	0.73386
					YDR239C	0.73625
					SNU56	0.58565
					BUD26	0.41427
					AMD2	0.011818
					PRP28	0.47796
					PEX5	0.45144
					MNN10	0.4351
					TRS23	0.30624
					YDR246W-A	0.5958
					VHS1	0.64732
					YDR248C	0.45637
					YDR249C	0.46489
					YDR250C	0.90625
					PAM1	0.48978
					BTT1	0.49553
					MET32	0.33666
					CHL4	0.65572
					RMD5	0.0085819
					CTA1	0.75669
					RKM4	0.46003
					HSP78	0.81572
					YAP6	0.23799
					SWM1	0.97079
					EXG2	0.81839
					YDR262W	0.053735
					DIN7	0.24252
					AKR1	0.55001
					PEX10	0.046868
					HEL2	0.944
					CIA1	0.78785
					MSW1	0.83663
					YDR269C	0.8904
					CCC2	0.24859
					YDR271C	0.68275
					GLO2	0.38075
					DON1	0.076127
					YDR274C	0.32665
					BSC2	0.99821
					PMP3	0.82762
					MTH1	0.79894
					YDR278C	0.61909
					RNH202	0.59694
					RRP45	0.069923
					PHM6	0.74874
					YDR282C	0.17348
					GCN2	0.30251
					DPP1	0.39307
					ZIP1	0.48404
					YDR286C	0.12294
					INM2	0.18688
					NSE3	0.82904
					RTT103	0.22215
					YDR290W	0.89987
					HRQ1	0.12163
					SRP101	0.55137
					SSD1	0.97591
					DPL1	0.010867
					HDA2	0.3525
					MHR1	0.055215
					SUR2	0.66633
					ATP5	0.86208
					BFR2	0.51288
					PRO1	0.29251
					CFT1	0.44004
					GPI11	0.84825
					RSC3	0.49499
					CPR5	0.54212
					HNT2	0.26762
					YDR306C	0.28488
					PMT7	0.93068
					SRB7	0.63593
					GIC2	0.7661
					SUM1	0.098097
					TFB1	0.45708
					SSF2	0.95507
					PIB1	0.74829
					RAD34	0.55259
					IPK1	0.0010238
					OMS1	0.11806
					HIM1	0.86114
					MCM21	0.21656
					YFT2	0.50041
					SWA2	0.55634
					DAD4	0
					YDR320W-B	0.77713
					ASP1	0.10307
					MRPL35	0.62389
					TIM11	0.35101
					PEP7	0.14298
					UTP4	0.41439
					YCG1	0.39654
					YSP2	0.18815
					YDR327W	0.74228
					SKP1	0.93969
					PEX3	0.32591
					UBX5	0.92679
					GPI8	0.62278
					IRC3	0.14456
					RQC1	0.79689
					SWR1	0.99157
					MSN5	0.22827
					YDR336W	0.90839
					MRPS28	0.77618
					YDR338C	0.58173
					FCF1	0.69679
					YDR340W	0.63339
					YDR341C	0.72715
					HXT7	0.55849
					HXT6	0.32707
					YDR344C	0.28897
					HXT3	0.92479
					SVF1	0.5791
					MRP1	0.68279
					PAL1	0.45732
					YPS7	0.84558
					ATP22	0.012113
					SBE2	0.64083
					YPQ2	0.3331
					TRR1	0.055722
					TRP4	0.32144
					YDR354C-A	0.57264
					YDR355C	NaN
					SPC110	0.95893
					CNL1	0.75235
					GGA1	0.47285
					EAF1	0.1091
					OPI7	0.32038
					BCP1	0.72424
					TFC6	0.8245
					ESC2	0.20581
					SEM1	0.99335
					CDC40	0.66026
					ESF1	0.46742
					YDR366C	0.95432
					KEI1	0.25246
					YPR1	0.54709
					XRS2	0.0019856
					DXO1	0.12178
					CTS2	0.14976
					YDR371C-A	0.06016
					VPS74	0.085993
					FRQ1	0.38585
					PHO92	0.1449
					WIP1	0.69523
					BCS1	0.79109
					ARH1	0.43943
					ATP17	0.081846
					LSM6	0.87035
					RGA2	0.98897
					SDH6	0.1976
					ARO10	0.44381
					YRA1	0.44341
					YDR381C-A	0.22534
					RPP2B	0.76748
					NKP1	0.22964
					ATO3	0.9706
					EFT2	0.042821
					MUS81	0.74635
					YDR387C	0.81912
					RVS167	0.31485
					SAC7	0.40182
					UBA2	0.098493
					YDR391C	0.28682
					SPT3	0.17204
					SHE9	0.0073498
					RPT3	0.42178
					SXM1	0.90676
					YDR396W	0.27883
					NCB2	0.28238
					UTP5	0.041021
					HPT1	0.85596
					URH1	0.80836
					YDR401W	0.28596
					DIT2	0.55372
					DIT1	0.089915
					RPB7	0.704
					MRP20	0.25687
					PDR15	0.74852
					YDR406W-A	0.53667
					TRS120	0.62797
					ADE8	0.20301
					SIZ1	0.40712
					STE14	0.57422
					DFM1	0.6306
					RRP17	0.99011
					YDR413C	0.96344
					ERD1	0.053907
					YDR415C	0.47655
					SYF1	0.88223
					YDR417C	0.82135
					RPL12B	0.23883
					RAD30	0.85316
					HKR1	0.52389
					ARO80	0.30804
					SIP1	0.6467
					CAD1	0.10142
					DYN2	0.75759
					SNX41	0.38204
					YDR426C	0.43938
					RPN9	0.65549
					BNA7	0.54349
					TIF35	0.8767
					CYM1	0.20175
					YDR431W	0.014467
					NPL3	0.25556
					YDR433W	0.13597
					GPI17	0.35935
					PPM1	0.76056
					PPZ2	0.79383
					GPI19	0.57088
					THI74	0.22005
					LRS4	0.85676
					DOT1	0.33172
					APT2	0.59578
					YDR442W	0.98353
					SSN2	0.75825
					YDR444W	0.058072
					YDR445C	0.020361
					ECM11	0.16462
					RPS17B	0.27395
					ADA2	0.21568
					UTP6	0.85856
					RPS18A	0.85087
					YHP1	0.19046
					PPN1	0.54983
					TSA2	0.71718
					GUK1	0.54522
					YDR455C	0.37232
					NHX1	0.41714
					TOM1	0.4253
					HEH2	0.81506
					PFA5	0.9375
					TFB3	0.050551
					MFA1	0.32272
					YDR461C-A	0.20609
					MRPL28	0.55435
					STP1	0.42062
					SPP41	0.22358
					YDR464C-A	0.91786
					RMT2	0.72821
					PKH3	0.36233
					YDR467C	0.58548
					TLG1	0.67108
					SDC1	0.35873
					UGO1	0.60268
					RPL27B	0.80126
					TRS31	0.17532
					PRP3	0.4996
					JIP4	0.6498
					YDR476C	0.22239
					SNF1	0.5132
					SNM1	0.5332
					PEX29	0.21311
					DIG2	0.80545
					PHO8	0.74726
					CWC21	0.23416
					KRE2	0.0052955
					VPS52	0.2639
					VPS72	0.31719
					VPS60	0.19957
					RIB3	NaN
					PAC11	0.59764
					SLD5	0.704
					PKH1	0.80489
					YDR491C	0.74819
					IZH1	0.33569
					MZM1	0.37965
					RSM28	0.038366
					VPS3	0.036281
					PUF6	0.23165
					ITR1	0.91263
					SEC20	0.53695
					LCD1	0.82591
					RPL37B	0.33263
					PLM2	0.83757
					SAM2	0.27932
					LPP1	0.79321
					SPG3	0.59643
					PSP1	0.7398
					GMC1	0.31925
					GIN4	0.67326
					GNP1	0.93473
					YDR509W	0.97269
					SMT3	0.35627
					YDR510C-A	0.32969
					SDH7	0.73785
					EMI1	0.81038
					GRX2	0.58698
					YDR514C	0.93042
					SLF1	0.21723
					EMI2	0.026589
					GRH1	0.26349
					EUG1	0.58601
					FPR2	0.56013
					URC2	0.5213
					YDR521W	0.35344
					SPS2	0.77538
					SPS1	0.80605
					AGE1	0.9125
					YDR524W-C	0.58526
					YDR524C-B	0.011425
					YDR524C-A	0.42577
					API2	0.57792
					SNA2	0.37217
					YDR526C	0.3622
					RBA50	0.26171
					HLR1	0.04206
					QCR7	0.41602
					APA2	0.42035
					CAB1	0.45702
					KRE28	0.21321
					HSP31	0.045566
					FIT1	0.57412
					YDR535C	0.82558
					STL1	0.047452
					YDR537C	0.32623
					PAD1	0.49268
					FDC1	0.094267
					IRC4	0.69834
					YDR541C	0.68751
					PAU10	0.55729
					YDR543C	0.65645
					YDR544C	0.30041
					YRF1-1	NaN
					YDR545C-A	NaN
					YEL077C	0.74796
					YEL077W-A	0.60238
					YEL076C-A	NaN
					YEL076C	NaN
					YEL075W-A	0.39018
					YEL075C	0.39018
					YEL074W	0.59954
					YEL073C	0.7634
					RMD6	0.69955
					DLD3	0.94388
					DSF1	0.62177
					HXT13	0.91755
					YEL068C	0.52956
					YEL067C	0.64095
					HPA3	0.31371
					SIT1	0.87727
					AVT2	0.14212
					CAN1	0.52435
					NPR2	0.77813
					CIN8	0.83077
					PRB1	0.1683
					SOM1	0.86016
					HHY1	0.48357
					PCM1	0.4113
					YEL057C	0.34184
					HAT2	0.50959
					POL5	0.50122
					RPL12A	0.95227
					YEL053W-A	0.96983
					MAK10	0.85708
					AFG1	0.37817
					VMA8	0.71264
					YEL050W-A	0.84813
					RML2	0.28725
					PAU2	0.61315
					TCA17	0.88275
					FRD1	0.50566
					GLY1	0.029666
					YEL045C	0.60794
					IES6	0.27128
					YEL043W	0.57104
					GDA1	0.043608
					YEF1	0.65725
					UTR2	0.11189
					CYC7	0.30681
					UTR4	0.70405
					RAD23	0.32281
					ANP1	0.02855
					UTR5	0.26592
					YEL034C-A	0.99396
					HYP2	0.74629
					MTC7	0.58848
					MCM3	0.81462
					YEL032C-A	0.28467
					SPF1	0.3593
					YEL030C-A	0.51716
					ECM10	0.74754
					BUD16	0.86301
					YEL028W	0.52342
					VMA3	0.78496
					SNU13	0.43191
					YEL025C	0.43026
					RIP1	0.55033
					YEL023C	0.30436
					GEA2	0.1433
					URA3	0.094307
					YEL020C-B	NaN
					TIM9	0.050237
					YEL020C	0.6105
					MMS21	0.17971
					YEL018C-A	0.86395
					EAF5	0.69777
					PMP2	0.99278
					GTT3	0.16579
					NPP2	0.1028
					EDC3	0.99201
					YEL014C	0.35725
					VAC8	0.32675
					UBC8	0.61966
					GLC3	0.013404
					YEL010W	0.021453
					YEL009C-A	0.0096199
					GCN4	0.75984
					YEL008W	0.2725
					YEL008C-A	0.46511
					MIT1	0.8881
					YEA6	0.041199
					VAB2	0.00017047
					YEA4	0.29147
					GIM4	0.030945
					WBP1	0.72572
					IRC22	0.016498
					MNN1	0.020851
					NOP16	0.046562
					PMI40	0.7694
					FMP52	0.085323
					YND1	0.22136
					NUG1	0.13828
					YER006C-A	0.30155
					PAC2	0.20062
					TMA20	0.35549
					SEC3	0.36603
					NTF2	0.704
					YER010C	0.0032738
					TIR1	0.75314
					PRE1	0.4792
					PRP22	0.94486
					HEM14	0.17698
					BUD25	0.66336
					FAA2	0.045841
					BIM1	0.45937
					AFG3	0.33586
					SPC25	0.67105
					ISC1	0.0085392
					SBH2	0.45105
					GPA2	0.98361
					RPN3	0.62952
					SRB4	0.27564
					PRO3	0.28202
					YER023C-A	NaN
					YAT2	0.94381
					GCD11	0.10444
					CHO1	0.52583
					GAL83	0.68272
					MIG3	0.35729
					SMB1	0.8683
					CHZ1	0.48493
					YPT31	0.90029
					FIR1	0.42751
					ZRG8	0.3498
					YER034W	0.62392
					EDC2	0.065192
					ARB1	0.43097
					PHM8	0.68061
					KRE29	0.97553
					YER038W-A	0.64972
					HVG1	0.70877
					YER039C-A	0.43455
					GLN3	0.58232
					YEN1	0.36158
					MXR1	0.83362
					SAH1	0.4101
					ERG28	0.96511
					MEI4	0.73841
					ACA1	0.83216
					SPO73	0.8677
					YER046W-A	0.56865
					SAP1	0.32705
					CAJ1	0.66503
					ISD11	0.94638
					TPA1	0.37919
					RSM18	0.93167
					JHD1	0.24641
					HOM3	0.14267
					PIC2	0.99728
					YER053C-A	0.76313
					GIP2	0.48086
					HIS1	0.063898
					FCY2	0.29296
					RPL34A	0.2183
					HMF1	0.35877
					PET117	0.82794
					PCL6	0.039634
					FCY21	0.86968
					FCY22	0.86593
					CEM1	0.37152
					GPP2	0.98334
					THO1	0.94478
					VHR2	0.59649
					ICL1	0.89647
					RRT13	0.96104
					YER066C-A	0.7848
					RGI1	0.94959
					YER067C-A	0.93419
					MOT2	0.74764
					YER068C-A	0.46467
					ARG5%2C6	0.33146
					RNR1	0.38498
					TDA2	0.9992
					VTC1	0.23262
					ALD5	0.82386
					RPS24A	0.96781
					YOS1	0.704
					PTP3	0.065166
					YER076C	0.6343
					YER076W-A	0.78349
					YER077C	0.24169
					ICP55	0.28523
					YER078W-A	0.81659
					YER079W	0.70075
					YER079C-A	0.067815
					AIM9	0.61571
					SER3	0.49533
					UTP7	0.72085
					GET2	0.97335
					YER084W	0.72621
					YER084W-A	0.5371
					YER085C	0.5371
					ILV1	0.58042
					AIM10	0.81158
					YER087C-A	0.99192
					SBH1	0.36358
					DOT6	0.93755
					YER088C-A	0.65709
					YER088W-B	0.044247
					PTC2	0.87908
					TRP2	0.32434
					YER090C-A	0.13622
					MET6	0.52336
					YER091C-A	0.86325
					IES5	0.98782
					TSC11	0.26216
					AIM11	0.11987
					PUP3	0.704
					RAD51	0.11678
					SHC1	0.52164
					YER097W	0.57839
					UBP9	0.76676
					PRS2	0.43696
					UBC6	0.37761
					AST2	0.2568
					RPS8B	0.27366
					SSA4	0.81921
					RTT105	0.87053
					NUP157	0.059352
					MAM1	0.68703
					GLE2	0.37611
					YER107W-A	0.079912
					FLO8	0.64547
					KAP123	0.89519
					SWI4	0.31805
					LSM4	0.9932
					TMN3	0.93966
					BOI2	0.79982
					SPR6	0.81469
					SLX8	0.68452
					RPL23B	0.59492
					SHO1	0.7665
					AVT6	0.47529
					YER119C-A	0.15648
					SCS2	0.28026
					YER121W	0.31069
					GLO3	0.43955
					YCK3	0.28107
					DSE1	0.53595
					RSP5	0.46769
					NSA2	0.90444
					LCP5	0.25693
					VFA1	0.76317
					SAK1	0.3401
					COM2	0.74622
					RPS26B	0.29943
					PMD1	0.32646
					GLC7	0.081071
					YER133W-A	0.46272
					YER134C	0.13334
					YER135C	0.78449
					GDI1	0.03655
					YER137C	0.53752
					YER137W-A	0.8681
					YER138W-A	0.23168
					RTR1	0.47271
					EMP65	0.13699
					COX15	0.39427
					MAG1	0.47973
					DDI1	0.054383
					UBP5	0.35269
					FTR1	0.31076
					YER145C-A	0.82431
					LSM5	0.2225
					SCC4	0.28598
					YER147C-A	0.45443
					SPT15	0.21916
					YER148W-A	0.38272
					PEA2	0.76495
					SPI1	0.71174
					UBP3	0.0756
					YER152C	0.90881
					YER152W-A	0.67278
					PET122	0.20402
					OXA1	0.098224
					BEM2	0.81583
					YER156C	0.14943
					COG3	0.78191
					YER158C	0.59131
					YER158W-A	0.41096
					BUR6	0.64662
					SPT2	0.9902
					RAD4	0.37095
					GCG1	0.88535
					CHD1	0.59425
					PAB1	0.19048
					YER165C-A	0.64411
					DNF1	0.9492
					BCK2	0.97706
					CCA1	0.57633
					RPH1	0.28808
					ADK2	0.36955
					RAD3	0.40423
					BRR2	0.22417
					YER172C-A	0.30265
					RAD24	0.4439
					GRX4	0.42768
					TMT1	0.60494
					YER175W-A	0.3105
					ECM32	0.63908
					BMH1	0.99551
					PDA1	0.895
					DMC1	0.32993
					ISC10	0.67089
					SLO1	0.56835
					YER181C	0.53091
					FMP10	0.32996
					FAU1	0.92388
					TOG1	0.63947
					PUG1	0.95379
					YER186C	0.91572
					YER187W	0.60086
					YER188W	0.18495
					YER188C-A	0.17152
					YER189W	0.2792
					YRF1-2	0.10343
					YER190C-A	NaN
					YER190C-B	NaN
					YFL068W	NaN
					YFL067W	0.96804
					YFL066C	0.57811
					YFL065C	0.59062
					YFL064C	0.72389
					YFL063W	0.19584
					COS4	0.15703
					DDI2	0.78153
					SNO3	0.86088
					SNZ3	0.7391
					THI5	0.42877
					AAD16	0.44469
					AAD6	0.49435
					AGP3	0.4223
					YFL054C	0.72669
					DAK2	0.028934
					YFL052W	0.88495
					YFL051C	0.10937
					ALR2	0.85701
					SWP82	0.37175
					EMP47	0.70928
					RGD2	0.079759
					FMP32	0.79688
					SEC53	0.49736
					OTU1	0.54763
					YFL042C	0.035678
					YFL041W-A	0.16189
					FET5	0.55275
					YFL040W	0.39477
					ACT1	0.54556
					YPT1	0.2792
					TUB2	0.40759
					RPO41	0.42075
					MOB2	0.50417
					RPL22B	0.73218
					YFL034W	0.13194
					RIM15	0.20407
					YFL032W	0.98526
					HAC1	0.92294
					YFL031C-A	0.58621
					AGX1	0.45546
					CAK1	0.69523
					CAF16	0.62881
					GYP8	0.27863
					STE2	0.069696
					BST1	0.74797
					EPL1	0.11924
					BUD27	0.035567
					FRS2	0.58406
					YFL021C-A	0.13665
					GAT1	0.33352
					PAU5	0.68379
					YFL019C	0.54199
					LPD1	0.75205
					SMX2	0.22083
					GNA1	0.20131
					MDJ1	0.5641
					YFL015W-A	0.68409
					YFL015C	0.1918
					HSP12	0.99913
					YFL013W-A	0.14007
					IES1	0.18257
					YFL012W-A	0.60676
					YFL012W	0.81498
					HXT10	0.31698
					AUA1	0.067539
					WWM1	0.82264
					CDC4	0.45166
					SMC1	0.78344
					BLM10	0.76992
					SEC4	0.704
					VTC2	0.48178
					MSH4	0.088364
					SPB4	0.65681
					DEG1	0.096989
					LOC1	0.62305
					NIC96	0.94564
					YPI1	0.089297
					RPN11	0.74206
					SAD1	0.11739
					YFR006W	0.17471
					YFH7	0.67635
					FAR7	0.72096
[truncated: 4,604 more rows]

## Sheet: WT vs. other
positively	selected					gene	fold_change	student_ttest
gene	fold_change	student_ttest				YAL069W	0.82408	0.1048
LYS2	2.0516	0.17985				YAL068W-A	0.33228	0.0016343
LYS4	3.9347	0.020977				PAU8	1.6771	0.21827
ARG4	2.399	0.036187				YAL067W-A	0.63852	0.051664
LYS1	2.6764	0.082332				SEO1	0.97689	0.75761
ARG3	3.3309	0.026429				YAL066W	0.80819	0.48511
ARG1	2.7182	0.074611				YAL065C	1.0573	0.55963
negatively	selected					YAL064W-B	0.97285	0.93907
gene	fold_change	student_ttest				TDA8	1.0461	0.80191
						YAL064W	0.96656	0.92493
						YAL063C-A	1.0632	0.87028
						FLO9	1.0399	0.79566
						GDH3	1.005	0.9636
						BDH2	1.0959	0.33057
						BDH1	0.87945	0.05514
						YAL059C-A	0.85899	0.2934
						ECM1	0.84749	0.23739
						CNE1	0.92483	0.57023
						YAL056C-A	1.1129	0.43399
						GPB2	0.90584	0.5444
						PEX22	0.91246	0.66395
						ACS1	0.9532	0.69553
						FLC2	0.87441	0.23858
						OAF1	1.0399	0.57076
						AIM2	0.92386	0.59253
						GEM1	0.90378	0.072391
						YAL047W-A	1.4458	0.024848
						SPC72	0.81396	0.33251
						AIM1	0.7361	0.13935
						YAL045C	0.95427	0.79305
						YAL044W-A	1.1711	0.52163
						GCV3	1.0611	0.58627
						PTA1	1.1246	0.68459
						YAL042C-A	1.2142	0.080884
						ERV46	1.0264	0.78306
						CDC24	0.81836	0.42558
						CLN3	1.0175	0.92557
						CYC3	1.2418	0.49148
						CDC19	0.82367	0.72509
						YAL037C-B	0.81835	0.71703
						YAL037C-A	0.86542	0.44115
						YAL037W	0.92998	0.42744
						RBG1	1.2063	0.030085
						FUN12	0.90225	0.80594
						YAL034C-B	1.0481	0.77006
						MTW1	0.92564	0.46746
						FUN19	0.9183	0.12981
						POP5	0.96124	0.90634
						PRP45	1.3337	0.011711
						YAL031W-A	0.89573	0.59299
						GIP4	0.90898	0.32438
						SNC1	0.74958	0.23353
						MYO4	0.9984	0.98377
						FRT2	1.0383	0.63631
						SAW1	0.80007	0.13557
						YAL026C-A	0.80268	0.4464
						DRS2	1.0806	0.79626
						MAK16	0.51549	0.34074
						LTE1	1.4781	0.083679
						PMT2	1.0842	0.5559
						FUN26	1.0042	0.96005
						CCR4	0.88211	0.56913
						ATS1	0.96245	0.81549
						YAL019W-A	1.0425	0.65482
						FUN30	0.86825	0.13522
						LDS1	0.82905	0.28442
						PSK1	0.97418	0.51722
						YAL016C-B	1.2708	0.23517
						YAL016C-A	1.1588	0.3492
						TPD3	0.43083	0.1115
						NTG1	1.1794	0.13117
						SYN8	1.0357	0.81737
						DEP1	0.82396	0.017521
						CYS3	0.54438	0.46678
						SWC3	0.85128	0.32336
						MDM10	0.18718	0.34602
						SPO7	0.94722	0.73537
						FUN14	0.88161	0.34124
						ERP2	1.023	0.49818
						SSA1	1.1191	0.25486
						YAL004W	0.96359	0.85905
						EFB1	5.1785	0.043505
						VPS8	1.2794	0.15385
						TFC3	0.98106	0.903
						NUP60	1.0436	0.79857
						ERP1	1.0576	0.71476
						SWD1	1.2218	0.39836
						RFA1	0.86897	0.56164
						SEN34	1.5967	0.051606
						BUD14	0.99868	0.97641
						ADE1	1.7832	0.48967
						KIN3	0.84006	0.24245
						CDC15	0.75078	0.60934
						YAR019W-A	1.0084	0.94351
						PAU7	1.1696	0.47286
						YAR023C	1.0744	0.39283
						UIP3	0.92532	0.70548
						YAR028W	1.2547	0.32769
						YAR029W	1.0836	0.84981
						YAR030C	0.83278	0.31795
						PRM9	1.0326	0.86887
						MST28	1.2429	0.091132
						YAT1	0.95335	0.48221
						YAR035C-A	0.78429	0.30678
						SWH1	0.96119	0.71335
						YAR047C	0.70611	0.52867
						FLO1	0.99165	0.92356
						YAR053W	0.55022	0.028573
						YAR060C	NaN	NaN
						YAR064W	0.84952	0.33114
						YAR066W	1.2734	0.78832
						YAR068W	0.73164	0.64112
						YAR069C	NaN	NaN
						YAR070C	1.2805	0.63848
						PHO11	0.41603	0.14108
						IMD1	1.6979	0.06082
						YAR075W	0.81478	0.48008
						YBL113C	0.98749	0.9592
						YBL113W-A	4.1817	0.048591
						YBL112C	NaN	NaN
						YBL111C	0.7839	0.81906
						YBL109W	0.66536	0.10852
						PAU9	0	0.57613
						YBL108W	0.74253	0.20158
						YBL107W-A	0.60825	0.71654
						MIX23	0.88534	0.47074
						SRO77	1.0097	0.9427
						PKC1	0.6038	0.41501
						SEA4	0.97602	0.89993
						RTG3	0.654	0.106
						SFT2	0.55959	0.089159
						ECM21	0.97453	0.798
						YBL100W-C	1.1729	0.65344
						YBL100C	0.76926	0.77471
						ATP1	1.1172	0.91171
						BNA4	1.1922	0.37415
						BRN1	0.85465	0.33245
						YBL096C	1.6028	0.008247
						YBL095W	1.2475	0.15264
						YBL094C	1.4595	0.14583
						ROX3	0.83426	0.52181
						RPL32	0	0.57613
						SCS22	0.60806	0.13459
						MAP2	0.91338	0.67909
						MRP21	1.2431	0.5999
						AVT5	0.93517	0.58665
						TEL1	0.89364	0.4527
						RPL23A	0.78189	0.019222
						YBL086C	0.91463	0.65674
						BOI1	0.87408	0.073148
						CDC27	1.3914	0.0081475
						YBL083C	0.76765	0.40017
						ALG3	1.0438	0.80954
						YBL081W	0.77982	0.17687
						PET112	0.97516	0.96555
						NUP170	0.61329	0.032802
						ATG8	0.29354	0.064639
						YBL077W	1.3092	0.048623
						ILS1	1.1277	0.92189
						SSA3	0.99252	0.93991
						AAR2	0.84301	0.34288
						YBL073W	1.2137	0.18703
						RPS8A	0.99171	0.98322
						YBL071C-B	0.64264	0.19138
						KTI11	1.2914	0.61864
						YBL071C	0.67822	0.06063
						YBL070C	0.46023	0.033048
						AST1	0.76138	0.18074
						YBL068W-A	0.24909	0.11713
						PRS4	1.1113	0.57269
						UBP13	0.98408	0.85734
						SEF1	0.95725	0.8187
						YBL065W	1.6581	0.026064
						PRX1	1.2467	0.31108
						KIP1	1.0241	0.78623
						YBL062W	1.0059	0.98774
						SKT5	0.79171	0.20675
						YEL1	0.83509	0.085652
						CMC2	0.46586	0.30416
						YBL059W	0.86502	0.59936
						SHP1	1.0783	0.81822
						PTH2	0.82264	0.23826
						PTC3	0.99793	0.99336
						YBL055C	0.9033	0.49545
						TOD6	0.89205	0.50966
						YBL053W	0.69096	0.12727
						SAS3	1.0107	0.90613
						PIN4	0.9908	0.97454
						SEC17	0	0.39301
						MOH1	1.145	0.63405
						RRT1	0.70895	0.20724
						EDE1	0.96527	0.82926
						PSY4	0.83939	0.14935
						COR1	1.128	0.75549
						YBL044W	0.92306	0.15455
						ECM13	1.0601	0.77804
						FUI1	0.71873	0.0012662
						PRE7	0	0.3778
						ERD2	0.66846	0.025113
						YBL039W-B	1.0727	0.88898
						URA7	1.0354	0.49852
						YBL039C-A	0.6703	0.61866
						MRPL16	0.98706	0.97586
						APL3	0.86326	0.11156
						YBL036C	0.90596	0.39248
						POL12	0.61159	0.077738
						STU1	1.2541	0.24544
						RIB1	1.0666	0.83843
						HEK2	1.0043	0.98715
						SHE1	0.88586	0.64798
						PET9	1.3196	0.59089
						YBL029C-A	0.72042	0.080107
						YBL029W	0.86618	0.32689
						YBL028C	0.85423	0.53916
						RPL19B	0.50263	0.076704
						LSM2	1.2254	0.79599
						RRN10	0.6496	0.35048
						NCL1	0.98696	0.88958
						MCM2	0.95122	0.80642
						PIM1	1.3182	0.48653
						HAP3	0.94696	0.55472
						RFT1	0.88443	0.69589
						APN2	0.89067	0.069475
						POP8	0.76997	0.14661
						PEP1	1.0551	0.5315
						FUS3	0.95944	0.7339
						ACH1	1.3734	0.0026384
						RRN6	1.0983	0.29092
						FMT1	1.2677	0.096438
						YBL012C	0.95946	0.81736
						SCT1	1.0692	0.49894
						YBL010C	1.0863	0.42265
						ALK2	1.1058	0.075266
						YBL008W-A	0.85416	0.35056
						HIR1	1.0708	0.32365
						SLA1	0.89078	0.69532
						LDB7	0.87357	0.54724
						YBL006W-A	0.82603	0.41647
						PDR3	0.99095	0.93448
						UTP20	1.3606	0.29308
						HTA2	0.81895	0.30403
						HTB2	1.127	0.34817
						ECM15	1.4019	0.045597
						NTH2	1.2629	0.050127
						RER2	1.2911	0.3539
						COQ1	1.4574	0.31057
						GPI18	1.9444	0.29736
						RCR1	1.231	0.042267
						UGA2	1.061	0.64798
						DSF2	1.1929	0.025289
						FLR1	1.1439	0.021526
						HHF1	0.89388	0.76311
						HHT1	1.1876	0.19639
						IPP1	1.0189	0.95082
						YBR012C	1.0915	0.62106
						YBR013C	1.0847	0.49956
						GRX7	1.0848	0.67216
						MNN2	0.95378	0.55905
						YBR016W	0.98387	0.90861
						KAP104	1.2188	0.31005
						GAL7	4.3941	0.026054
						GAL10	1.0733	0.80034
						GAL1	1.2389	0.5541
						FUR4	0.80117	0.20683
						POA1	0.78516	0.045284
						CHS3	0.83307	0.29282
						SCO2	0.89221	0.42644
						OLA1	1.3473	0.14378
						ETR1	0.93292	0.5316
						YBR027C	1.0241	0.88838
						YPK3	0.93763	0.66538
						CDS1	0.58694	0.33064
						RKM3	0.83366	0.25404
						RPL4A	0.78131	0.5492
						YBR032W	1.2008	0.37403
						EDS1	0.94868	0.71254
						HMT1	1.2411	0.27399
						PDX3	1.5063	0.30488
						CSG2	2.4344	0.15592
						SCO1	1.3743	0.42947
						CHS2	0.48199	0.13967
						ATP3	2.0752	0.31349
						FIG1	0.60649	0.031325
						FAT1	1.1335	0.30178
						CST26	1.1121	0.31598
						QDR3	0.78642	0.02764
						TCM62	1.0486	0.64177
						GIP1	0.91738	0.51775
						ZTA1	0.99957	0.9979
						FMP23	0.97669	0.78021
						RPS11B	0.85319	0.56363
						REB1	0.75398	0.65222
						REG2	1.1543	0.1182
						YBR051W	0.83071	0.45007
						RFS1	0.80132	0.27237
						YBR053C	1.0691	0.49687
						YRO2	1.096	0.54489
						PRP6	0.63454	0.020092
						YBR056W	0.88456	0.47935
						YBR056W-A	1.398	0.2459
						YBR056C-B	1.3493	0.28757
						MUM2	1.2418	0.30745
						UBP14	1.2966	0.12947
						TSC3	0.40896	0.1909
						AKL1	0.95359	0.64503
						ORC2	1.3268	0.215
						TRM7	1.2744	0.31253
						YBR062C	0.89321	0.70918
						YBR063C	1.1804	0.18272
						YBR064W	0.85905	0.47615
						ECM2	1.0526	0.47284
						NRG2	0.77387	0.39128
						TIP1	0.67564	0.1427
						BAP2	1.1511	0.77001
						TAT1	0.55778	0.23427
						ALG14	Inf	0.11739
						YBR071W	1.0951	0.62867
						HSP26	1.0667	0.81245
						YBR072C-A	0.83175	0.24338
						RDH54	1.0628	0.70154
						PFF1	1.063	0.51853
						ECM8	0.7744	0.39578
						YBR076C-A	0.81938	0.36086
						SLM4	0.82422	0.34011
						ECM33	0.86069	0.31297
						RPG1	0.84102	0.50508
						SEC18	2.715	0.012928
						SPT7	0.76332	0.33528
						UBC4	0.66111	0.2301
						TEC1	0.70718	0.0051113
						MIS1	0.95899	0.58392
						RPL19A	1.027	0.88861
						AAC3	0.94325	0.86508
						YBR085C-A	1.0394	0.86551
						IST2	1.0664	0.743
						RFC5	0.91872	0.94819
						POL30	1.115	0.93328
						YBR089W	Inf	0.11739
						NHP6B	0.91469	0.55159
						YBR090C	0.78707	0.30063
						TIM12	NaN	NaN
						PHO3	1.0584	0.68561
						PHO5	0.84896	0.43525
						PBY1	0.94235	0.58221
						RXT2	0.96512	0.9022
						YBR096W	0.90785	0.36882
						VPS15	0.93503	0.71967
						MMS4	0.90472	0.49088
						YBR099C	0.80823	0.43854
						FES1	1.0481	0.8569
						EXO84	0.97144	0.90666
						SIF2	0.70473	0.13419
						YBR103C-A	1.3137	0.00052808
						YMC2	1.1234	0.26628
						VID24	1.1447	0.43754
						PHO88	0.88373	0.59341
						IML3	0.73205	0.4123
						AIM3	1.0474	0.66133
						CMD1	0	0.37433
						YBR109W-A	0.93954	0.87545
						ALG1	0	0.13171
						YSA1	0.71341	0.15381
						SUS1	0.56901	0.35423
						CYC8	0.68432	0.11939
						YBR113W	0.69304	0.40048
						RAD16	1.0549	0.63004
						LYS2	2.0516	0.17985
						YBR116C	0.94472	0.76545
						TKL2	1.0734	0.5482
						TEF2	1.8845	0.33804
						MUD1	0.95907	0.90933
						CBP6	0.62242	0.27659
						GRS1	0	0.57613
						YBR121C-A	NaN	NaN
						MRPL36	1.6653	0.025114
						TFC1	0.52367	0.34177
						YBR124W	1.1677	0.12043
						PTC4	0.9395	0.64548
						TPS1	0.46684	0.20108
						YBR126W-A	1.0375	0.86556
						YBR126W-B	0.94964	0.80783
						VMA2	1.0716	0.7797
						ATG14	0.89091	0.69429
						OPY1	1.4013	0.11082
						SHE3	0.90755	0.74174
						CCZ1	1.1068	0.85542
						YBR131C-A	0	0.57613
						AGP2	0.74892	0.10319
						HSL7	0.74264	0.082972
						YBR134W	1.335	0.036828
						CKS1	0.33966	0.088732
						MEC1	1.389	0.41378
						YBR137W	1.0225	0.90381
						YBR138C	1.1362	0.31144
						YBR139W	1.7765	0.0041896
						IRA1	1.0521	0.80398
						BMT2	0.88777	0.55843
						YBR141W-A	0.36403	0.055861
						MAK5	1.4829	0.44851
						SUP45	0	0.57613
						YBR144C	1.0172	0.94531
						ADH5	0.88145	0.27692
						MRPS9	0.95166	0.93942
						RTC2	0.80173	0.39085
						YSW1	0.97512	0.88348
						ARA1	1.176	0.40989
						TBS1	0.88825	0.64951
						APD1	0.75435	0.014983
						SPP381	0.62927	0.038907
						RIB7	3.1919	0.12676
						RPB5	2.8597	0.44729
						CNS1	1.8569	0.24482
						SLI15	1.4854	0.37625
						ICS2	0.98315	0.91539
						AMN1	1.1019	0.51877
						IFA38	1.6421	0.54254
						CDC28	0	0.20751
						CSH1	0.66005	0.13873
						TOS1	1.0429	0.84826
						YSY6	0.82492	0.7841
						EXO5	0.85498	0.76546
						ARL1	2.0089	0.0089703
						UBS1	0.89667	0.75701
						TYR1	1.6788	0.27092
						POP7	0	0.57613
						PEX32	0.66621	0.039301
						SSE2	0.88113	0.48282
						NPL4	0.98817	0.95793
						SEC66	1.2396	0.50823
						SMY2	1.1238	0.58801
						UMP1	1.4614	0.52678
						YBR174C	0.84472	0.4058
						SWD3	0.49117	0.12878
						ECM31	0.97401	0.86225
						EHT1	0.97809	0.90741
						YBR178W	0.89143	0.476
						FZO1	0.88886	0.83199
						DTR1	0.71203	0.055943
						RPS6B	0.86924	0.69567
						SMP1	0.81358	0.2349
						YBR182C-A	0.85775	0.67484
						YPC1	0.77212	0.53355
						YBR184W	0.85273	0.33789
						MBA1	0.87413	0.66773
						PCH2	0.80789	0.11469
						GDT1	0.9295	0.82841
						NTC20	1.117	0.50081
						RPS9B	0.7062	0.47478
						YBR190W	1.198	0.55445
						RPL21A	1.6251	0.54451
						YBR191W-A	0	0.26659
						RIM2	0.81926	0.79889
						MED8	0.3316	0.27659
						AIM4	0.70079	0.27517
						MSI1	0.92012	0.74703
						PGI1	0	0.57613
						YBR196C-A	0.99462	0.96993
						YBR196C-B	1.3271	0.25005
						YBR197C	1.264	0.20128
						TAF5	0.57906	0.70517
						KTR4	0.9251	0.69536
						BEM1	0.64508	0.30517
						YBR200W-A	0.2242	0.14225
						DER1	0.7109	0.38975
						YBR201C-A	1.0257	0.94065
						MCM7	0.95597	0.91163
						COS111	1.1635	0.54033
						LDH1	0.88083	0.43613
						KTR3	0.71746	0.031418
						YBR206W	0.71066	0.036491
						FTH1	0.91927	0.61595
						DUR1%2C2	0.97356	0.88871
						YBR209W	0.99156	0.88146
						ERV15	0.89144	0.66714
						AME1	1.2684	0.23774
						NGR1	0.97893	0.85826
						MET8	1.1788	0.38268
						SDS24	0.9203	0.59054
						HPC2	1.5445	0.070173
						YBP1	1.0839	0.68999
						ATG12	1.2551	0.20742
						PYC2	1.0094	0.85766
						YBR219C	1.0564	0.45391
						YBR220C	1.1082	0.33641
						PDB1	0.9496	0.80487
						YBR221W-A	1.1037	0.43423
						PCS60	1.0892	0.34968
						TDP1	0.86296	0.016381
						YBR223W-A	1.4215	0.091854
						YBR224W	1.4895	0.024291
						YBR225W	0.5862	0.0030466
						YBR226C	1.0676	0.8482
						MCX1	0.74561	0.10162
						SLX1	0.78035	0.21518
						ROT2	0.94036	0.77446
						OM14	0.52774	0.15312
						YBR230W-A	1.8073	0.0080429
						SWC5	0.82207	0.53647
						YBR232C	0.75281	0.13321
						PBP2	0.75759	0.033954
						DAD3	0	0.37534
						ARC40	0	0.57613
						VHC1	1.3086	0.052726
						ABD1	0.25448	0.20562
						PRP5	0.25469	0.27691
						YBR238C	0.87696	0.52886
						ERT1	0.93858	0.58402
						THI2	1.1641	0.49439
						YBR241C	1.0077	0.9737
						YBR242W	1.3927	0.11188
						ALG7	0.88211	0.90546
						GPX2	0.61209	0.053698
						ISW1	1.0564	0.76689
						RRT2	0.95409	0.86651
						ENP1	0.96655	0.96565
						HIS7	1.0877	0.65691
						ARO4	0.95347	0.81214
						SPO23	1.06	0.72359
						MRPS5	1.3668	0.46347
						DUT1	1.1154	0.93583
						SRB6	1.4542	0.37957
						TRS20	1.7883	0.59638
						MTC4	0.67481	0.055646
						YBR255C-A	0.61584	0.22943
						RIB5	0.86717	0.79317
						POP4	0	0.37394
						SHG1	1.0994	0.72896
						YBR259W	1.02	0.79206
						RGD1	0.84564	0.3896
						TAE1	1.1959	0.16458
						MIC12	1.1808	0.63845
						SHM1	0.88104	0.25172
						YPT10	0.84993	0.35065
						TSC10	0.77851	0.65448
						REI1	0.94432	0.81168
						SLM6	0.77161	0.66791
						MRPL37	1.1531	0.85532
						FMP21	1.1382	0.70601
						BIT2	0.64471	0.036172
						EFM2	0.84901	0.53922
						HSM3	0.75809	0.080463
						UBX7	0.59912	0.11884
						CHK1	1.2477	0.36037
						RIF1	0.9867	0.92882
						PPS1	0.95793	0.77782
						YBR277C	0.96728	0.8918
						DPB3	0.69074	0.19564
						PAF1	0.86697	0.45693
						SAF1	1.1555	0.58249
						DUG2	0.81265	0.1641
						MRPL27	0.74803	0.66507
						SSH1	0.96176	0.73824
						YBR284W	1.0304	0.70492
						YBR285W	1.0794	0.90167
						APE3	1.3873	0.028529
						YBR287W	0.96953	0.81836
						APM3	0.70555	0.10322
						SNF5	0.96628	0.84864
						BSD2	0.7352	0.12057
						CTP1	0.9569	0.63238
						YBR292C	0.67515	0.073053
						VBA2	1.0511	0.77303
						SUL1	0.87692	0.1423
						PCA1	0.80874	0.22801
						PHO89	0.90688	0.54575
						YBR296C-A	0.54404	0.099478
						MAL33	1.1295	0.37695
						MAL31	0.81157	0.52692
						YBR298C-A	1.4798	0.051075
						MAL32	1.2412	0.41311
						YBR300C	0.71961	0.40739
						PAU24	1.3956	0.42403
						COS2	0	0.3018
						YCL076W	0.18539	0.028204
						GEX1	1.1369	0.71688
						VBA3	0.56841	0.52162
						YCL068C	0.26999	0.1871
						HMLALPHA2	NaN	NaN
						HMLALPHA1	NaN	NaN
						YCL065W	0	0.57613
						CHA1	0.57841	0.25725
						VAC17	1.0942	0.54593
						MRC1	0.75961	0.23893
						KRR1	1.0522	0.93366
						FYV5	0.84534	0.49232
						ADF1	0.84436	0.77053
						MIC10	1.1628	0.73547
						PRD1	0.82219	0.36587
						PEX34	1.7004	0.02617
						KAR4	1.0641	0.72544
						SPB1	0.962	0.92743
						PBN1	0.82188	0.27931
						LRE1	0.9521	0.74553
						APA1	0.87162	0.50547
						YCL049C	1.1153	0.40812
						YCL048W-A	1.1633	0.6145
						SPS22	1.2667	0.20067
						POF1	0.88256	0.3577
						EMC1	1.1183	0.59527
						YCL046W	0.64762	0.22944
						MGR1	0.8776	0.59544
						PDI1	1.7573	0.423
						YCL041C	0.93804	0.7343
						YCL042W	1.1272	0.52234
						GLK1	1.1673	0.0059578
						GID7	1.1657	0.25309
						ATG22	1.0442	0.67651
						SRO9	0.88163	0.27216
						GFD2	0.79904	0.084026
						GRX1	0.68085	0.16676
						LSB5	1.2026	0.12727
						MXR2	0.59544	0.0041656
						STE50	0.93653	0.54951
						RRP7	0.64956	0.53047
						HIS4	1.0142	0.90425
						BIK1	0.86983	0.38688
						RNQ1	0.92518	0.42582
						FUS1	0.88858	0.14544
						HBN1	0.79372	0.1567
						FRM2	0.85557	0.0327
						AGP1	0.9083	0.23137
						YCL023C	0.82963	0.15328
						KCC4	1.0581	0.47535
						YCL022C	0.86298	0.18951
						YCL021W-A	1.0271	0.75019
						LEU2	NaN	NaN
						NFS1	0.55971	0.53471
						DCC1	0.84481	0.31422
						BUD3	1.0059	0.94478
						YCL012C	0.8205	0.25119
						GBP2	1.0015	0.98994
						SGF29	1.3585	0.12903
						ILV6	0.95092	0.66152
						STP22	1.0594	0.75542
						YCL007C	0.84219	0.26831
						VMA9	0.63002	0.39697
						LDB16	1.009	0.96618
						PGS1	1.1312	0.80567
						YCL002C	1.0241	0.88023
						RER1	0.88158	0.75085
						YCL001W-A	0.64719	0.33201
						YCL001W-B	1.085	0.59124
						YCR001W	1.0908	0.52295
						CDC10	0.73567	0.54052
						MRPL32	1.0994	0.71039
						YCP4	0.7315	0.067914
						CIT2	1.0322	0.79043
						YCR006C	0.92018	0.70717
						YCR007C	0.91592	0.65101
						SAT4	0.98259	0.90069
						RVS161	1.0892	0.82668
						ADY2	0.81508	0.16163
						ADP1	1.1057	0.056072
						PGK1	0.42483	0.28083
						YCR013C	1.0602	0.81147
						POL4	0.92439	0.30835
						YCR015C	1.2082	0.13804
						YCR016W	1.1977	0.1971
						CWH43	0.97202	0.81042
						SRD1	1.2032	0.42993
						YCR018C-A	0.84818	0.38371
						MAK32	1.1655	0.098389
						PET18	1.3666	0.012227
						MAK31	1.4111	0.28597
						HTL1	0.24737	0.068193
						HSP30	1.1077	0.17208
						YCR022C	1.1142	0.25179
						YCR023C	0.88342	0.040684
						SLM5	1.0231	0.9631
						YCR024C-B	1.4839	0.0087765
						PMP1	1.0037	0.98694
						YCR025C	1.1818	0.11252
						NPP1	1.1116	0.25364
						RHB1	0.53503	0.019059
						FEN2	1.0402	0.90992
						RIM1	0.35914	0.25115
						SYP1	0.8281	0.25478
						RPS14A	1.1261	0.68721
						BPH1	1.0171	0.90096
						SNT1	0.99337	0.97695
						ELO2	0.59572	0.16993
						RRP43	6.483	0.02405
						RBK1	0.98311	0.76007
						PHO87	1.1177	0.39427
						BUD5	0.57146	0.10484
						YCR038W-A	0.87123	0.64827
						MATALPHA2	0	0.034755
						MATALPHA1	NaN	NaN
						YCR041W	0.87377	0.81151
						TAF2	0.98187	0.96091
						YCR043C	1.0132	0.95488
						PER1	0.74038	0.73014
						RRT12	0.96457	0.69118
						YCR045W-A	0.81358	0.37414
						IMG1	0.93431	0.86513
						BUD23	1.2165	0.45302
						YCR047W-A	3.0253	0.17972
						YCR049C	0.88806	0.39585
						ARE1	1.14	0.20791
						YCR050C	0.77524	0.31681
						YCR051W	1.2362	0.26757
						RSC6	0.74229	0.40892
						THR4	1.2958	0.26221
						CTR86	1.3063	0.36844
						PWP2	0.85547	0.63909
						YIH1	0.97759	0.88706
						TAH1	1.4841	0.27862
						YCR061W	0.93144	0.50572
						YCR064C	1.2376	0.091115
						BUD31	0.64476	0.18983
						HCM1	1.0649	0.55504
						RAD18	0.61775	0.16204
						SED4	0.89727	0.325
						ATG15	1.0668	0.61746
						CPR4	0.70539	0.012906
						IMG2	1.0628	0.92539
						RSA4	NaN	NaN
						SSK22	0.9351	0.55227
						SOL2	1.22	0.084766
						ERS1	0.7968	0.14609
						YCR075W-A	1.1547	0.72969
						FUB1	1.3649	0.15166
						PAT1	0.86582	0.66644
						PTC6	0.91849	0.61378
						SRB8	0.56821	0.48053
						YCR081C-A	0.48683	0.54706
						AHC2	0.76568	0.44023
						TRX3	0.69262	0.047565
						TUP1	1.5365	0.37024
						YCR085W	0.73955	0.23384
						CSM1	0.83716	0.56883
						YCR087W	1.0912	0.63835
						YCR087C-A	1.0433	0.84762
						ABP1	0.97539	0.80083
						FIG2	1.1905	0.15507
						YCR090C	1.0882	0.72386
						KIN82	1.1982	0.16508
						MSH3	0.97252	0.88245
						CDC39	0.86321	0.68034
						CDC50	2.2692	0.064473
						OCA4	0.76662	0.43466
						YCR095W-A	1.8366	0.30128
						HMRA2	NaN	NaN
						HMRA1	1.1072	0.88475
						YCR097W-A	1.014	0.97638
						GIT1	1.0026	0.99012
						YCR099C	0.72627	0.548
						YCR100C	0.82492	0.45749
						YCR101C	1.2988	0.34237
						YCR102C	0.62704	0.038341
						YCR102W-A	0.28198	0.18027
						PAU3	0.82349	0.36283
						ADH7	0.84701	0.45767
						RDS1	0.89114	0.58736
						AAD3	0.67402	0.21855
						YCR108C	1.0236	0.92128
						COS7	0.67685	0.45222
						YDL247W-A	Inf	0.11739
						MPH2	2.9548	0.12243
						SOR2	0	0.047819
						HXT15	0.66183	0.46172
						THI13	1.5263	0.13162
						AAD4	1.1303	0.41672
						YDL242W	1.182	0.42941
						YDL241W	0.98112	0.96002
						YDL240C-A	0.80598	0.020055
						LRG1	1.1477	0.094694
						ADY3	0.95199	0.59545
						GUD1	1.332	0.077739
						AIM6	0.69834	0.03215
						PHO13	1.0811	0.79697
						YPD1	1.0083	0.98389
						GYP7	0.92168	0.46139
						MFG1	0.67852	0.020628
						OST4	0	0.57613
						BRE4	1.0198	0.7987
						PTP1	0.84769	0.48402
						SSB1	0.8694	0.49587
						YDL228C	0.76888	0.26227
						HO	0.76384	0.10535
						GCS1	1.0805	0.73311
						SHS1	0.66216	0.11257
						WHI4	0.76874	0.42306
						HBT1	0.9297	0.43125
						FMP45	0.73555	0.40201
						YDL221W	1.1125	0.48171
						CDC13	1.1681	0.30763
						DTD1	0.16924	0.00918
						YDL218W	0.97772	0.89549
						TIM22	0.32572	0.2052
						RRI1	0.96801	0.86333
						GDH2	1.1044	0.26842
						PRR2	0.99628	0.97982
						NOP6	0.73724	0.43414
						SHR3	0.62551	0.51395
						YDL211C	1.0606	0.7597
						UGA4	0.92899	0.58815
						CWC2	0	0.12131
						NHP2	1.2734	0.21401
						GLE1	0.97099	0.90939
						YDL206W	0.98957	0.96768
						HEM3	0	0.21112
						RTN2	0.88076	0.40725
						ACK1	0.89289	0.41144
						MRPL11	1.5256	0.35748
						TRM8	0.98422	0.90691
						MGT1	0.99419	0.98215
						YDL199C	0.96953	0.85523
						GGC1	2.1768	0.029355
						ASF2	1.0848	0.66281
						YDL196W	1.0539	0.31089
						SEC31	2.2186	0.2235
						SNF3	0.84818	0.26975
						NUS1	0.34461	0.11441
						ARF1	0.8956	0.73187
						RPL35A	2.4297	0.36493
						UFD2	0.78822	0.32523
						RBS1	0.81439	0.39473
						PPH22	1.0269	0.90719
						YDL187C	0.82516	0.52153
						YDL186W	0.90099	0.73002
						YDL185C-A	0.52052	0.24735
						VMA1	0.41598	0.027454
						RPL41A	0	0.57613
						YDL183C	1.0914	0.33562
						LYS20	0.8808	0.54247
						INH1	0.63414	0.022118
						YDL180W	0.70356	0.020595
						PCL9	0.69401	0.2338
						DLD2	1.2602	0.057248
						YDL177C	0.76326	0.32214
						YDL176W	0.89998	0.21852
						AIR2	1.036	0.76373
						DLD1	1.0079	0.94232
						PAR32	1.4196	0.054321
						YDL172C	1.3324	0.16835
						GLT1	0.78726	0.012712
						UGA3	0.94525	0.21287
						UGX2	1.0144	0.9461
						SFA1	0.86297	0.59038
						NRP1	0.8109	0.37544
						FAP7	0.92843	0.92369
						CDC36	1.3629	0.56571
						CDC9	1.1486	0.67764
						YDL163W	0.98849	0.97307
						YDL162C	0.92381	0.28754
						ENT1	0.7882	0.12554
						MHF2	0.56982	0.17936
						DHH1	0.89679	0.79294
						YDL159W-A	0.91525	0.57684
						STE7	1.0171	0.86499
						YDL159C-B	1.2962	0.57709
						YDL158C	1.3948	0.46626
						YDL157C	0.83975	0.64568
						CMR1	0.82326	0.20051
						CLB3	0.95319	0.78617
						MSH5	0.86344	0.26186
						SAS10	0.22863	0.019506
						YDL152W	0.77068	0.22948
						BUD30	0.42736	0.29086
						RPC53	0.35019	0.22925
						ATG9	0.63958	0.063616
						NOP14	0.87306	0.399
						RPN5	1.987	0.21289
						LDB17	0.68582	0.16652
						COP1	1.3802	0.49613
						YDL144C	1.2577	0.15713
						CCT4	1.8471	0.57599
						CRD1	1.2099	0.34093
						BPL1	1.8325	0.30383
						RPO21	0.64844	0.20123
						SCM3	0.34897	0.22662
						RGT2	0.92107	0.60268
						ARF2	1.1337	0.36939
						RPL35B	1.5435	0.1435
						RDI1	0.90282	0.67763
						PPH21	1.0572	0.66197
						RPL41B	0	0.069353
						SRF1	0.68177	0.0089435
						CDC53	0.66171	0.38396
						LYS21	1.0185	0.90911
						STF1	0.6829	0.13802
						RPP1B	0.66607	0.041648
						YDL129W	0.80249	0.14753
						VCX1	0.77982	0.28611
						PCL2	0.99703	0.98838
						CDC48	1.2712	0.63041
						HNT1	0.96498	0.79963
						YDL124W	1.0569	0.6875
						SNA4	1.1818	0.43585
						UBP1	1.046	0.85507
						YDL121C	1.6049	0.017101
						YFH1	0	0.20652
						YDL119C	0.73049	0.089884
						YDL118W	0.60083	0.19464
						CYK3	0.97361	0.85745
						NUP84	0.94758	0.92422
						IWR1	0.91888	0.74589
						YDL114W-A	Inf	0.11739
						YDL114W	0.91574	0.6023
						ATG20	1.28	0.090913
						TRM3	1.002	0.97082
						RRP42	1.4934	0.18492
						TMA17	0.65336	0.10296
						YDL109C	1.1056	0.47436
						KIN28	0.73358	0.16469
						MSS2	1.1164	0.77473
						PHO2	1.2341	0.51554
						NSE4	1.3054	0.75724
						QRI7	0.90886	0.57612
						QRI1	0.39418	0.018256
						POL3	1.1698	0.61881
						DUN1	0.93576	0.78252
						GET3	0.98211	0.94761
						BUG1	0.84738	0.33207
						SNU23	1.2498	0.35297
						RPN6	1.5017	0.58425
						OPI6	1.1678	0.45272
						PMT1	1.1623	0.36229
						YDL094C	1.1091	0.51176
						PMT5	1.0557	0.090209
						SRP14	0.8475	0.5979
						UBX3	0.82819	0.25512
						RAM1	0.46658	0.10961
						NUR1	0.94441	0.57054
						ASM4	1.1415	0.39766
						LUC7	1.5009	0.084978
						YDL086W	1.1482	0.29746
						YDL086C-A	1.1319	0.52104
						YDL085C-A	0.98828	0.96923
						NDE2	0.85736	0.42675
						SUB2	0.43012	0.15518
						RPS16B	0.80272	0.3934
						RPL13A	0.83408	0.39137
						RPP1A	0.81232	0.62988
						THI3	1.2195	0.18702
						MRK1	0.95885	0.69689
						MDH3	0.74685	0.20788
						VAM6	1.9083	0.12211
						RXT3	0.69921	0.094903
						RPL31A	0.20034	0.18848
						BRE1	1.5008	0.27891
						YDL073W	1.1286	0.6267
						YET3	1.3475	0.24463
						YDL071C	0.65149	0.016356
						BDF2	0.7821	0.15754
						CBS1	0.94678	0.89795
						YDL068W	0.7953	0.70306
						COX9	3.3333	0.098929
						IDP1	1.1184	0.3251
						PEX19	0.77819	0.21684
						UBC9	0	0.37433
						SYO1	0.95112	0.84191
						YDL062W	0.8482	0.42081
						RPS29B	1.9198	0.10396
						TSR1	3.0907	0.048055
						RAD59	1.0807	0.70589
						USO1	1.0721	0.59864
						YDL057W	0.82994	0.3253
						MBP1	1.2062	0.20215
						PSA1	2.135	0.31251
						MCH1	1.0779	0.28129
						PBP4	0.96408	0.88241
						SLC1	1.1421	0.39494
						LHP1	0.87616	0.44719
						YDL050C	0.56182	0.051935
						KNH1	1.0741	0.57528
						STP4	0.96234	0.71425
						SIT4	0.87163	0.69799
						NPC2	1.3158	0.019585
						MRP10	0.8757	0.67943
						FAD1	1.7983	0.16148
						MTF2	0.99602	0.99152
						PRP11	0.6975	0.30391
						SIR2	1.0001	0.99888
						YDL041W	0.83931	0.046893
						NAT1	0.99766	0.98339
						PRM7	0.8266	0.25333
						BSC1	1.3499	0.019814
						PUS9	1.129	0.28158
						GPR1	1.0099	0.95885
						YDL034W	1.2579	0.52689
						SLM3	0.81309	0.14518
						YDL032W	0.76694	0.15567
						DBP10	1.5253	0.085246
[truncated: 5,590 more rows]
