# Supplementary figures and images for: Functional mapping of yeast genomes by saturated transposition
Source: eLife journal article supplement (doi:10.7554/elife.23570), 2017-05-08

Figure 1 Supplement 1

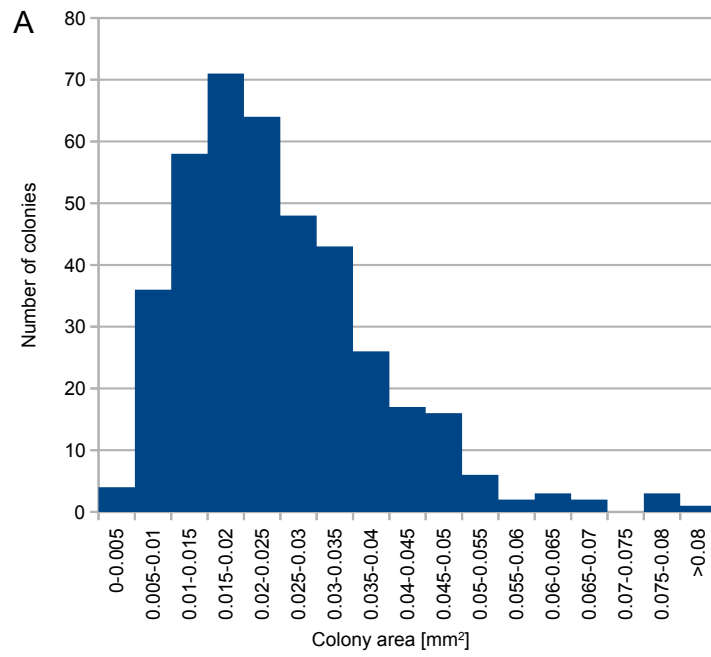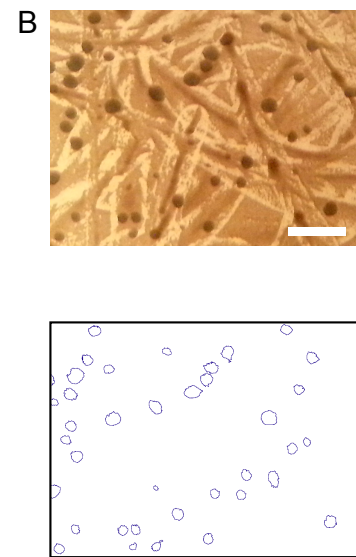

Supplement: supp [file elife_poa_e23570_Figure_1_figure_Supplement_1.pdf › elife_poa_e23570_Figure_1_figure_Supplement_1.pdf]

Figure 1 Supplement 2

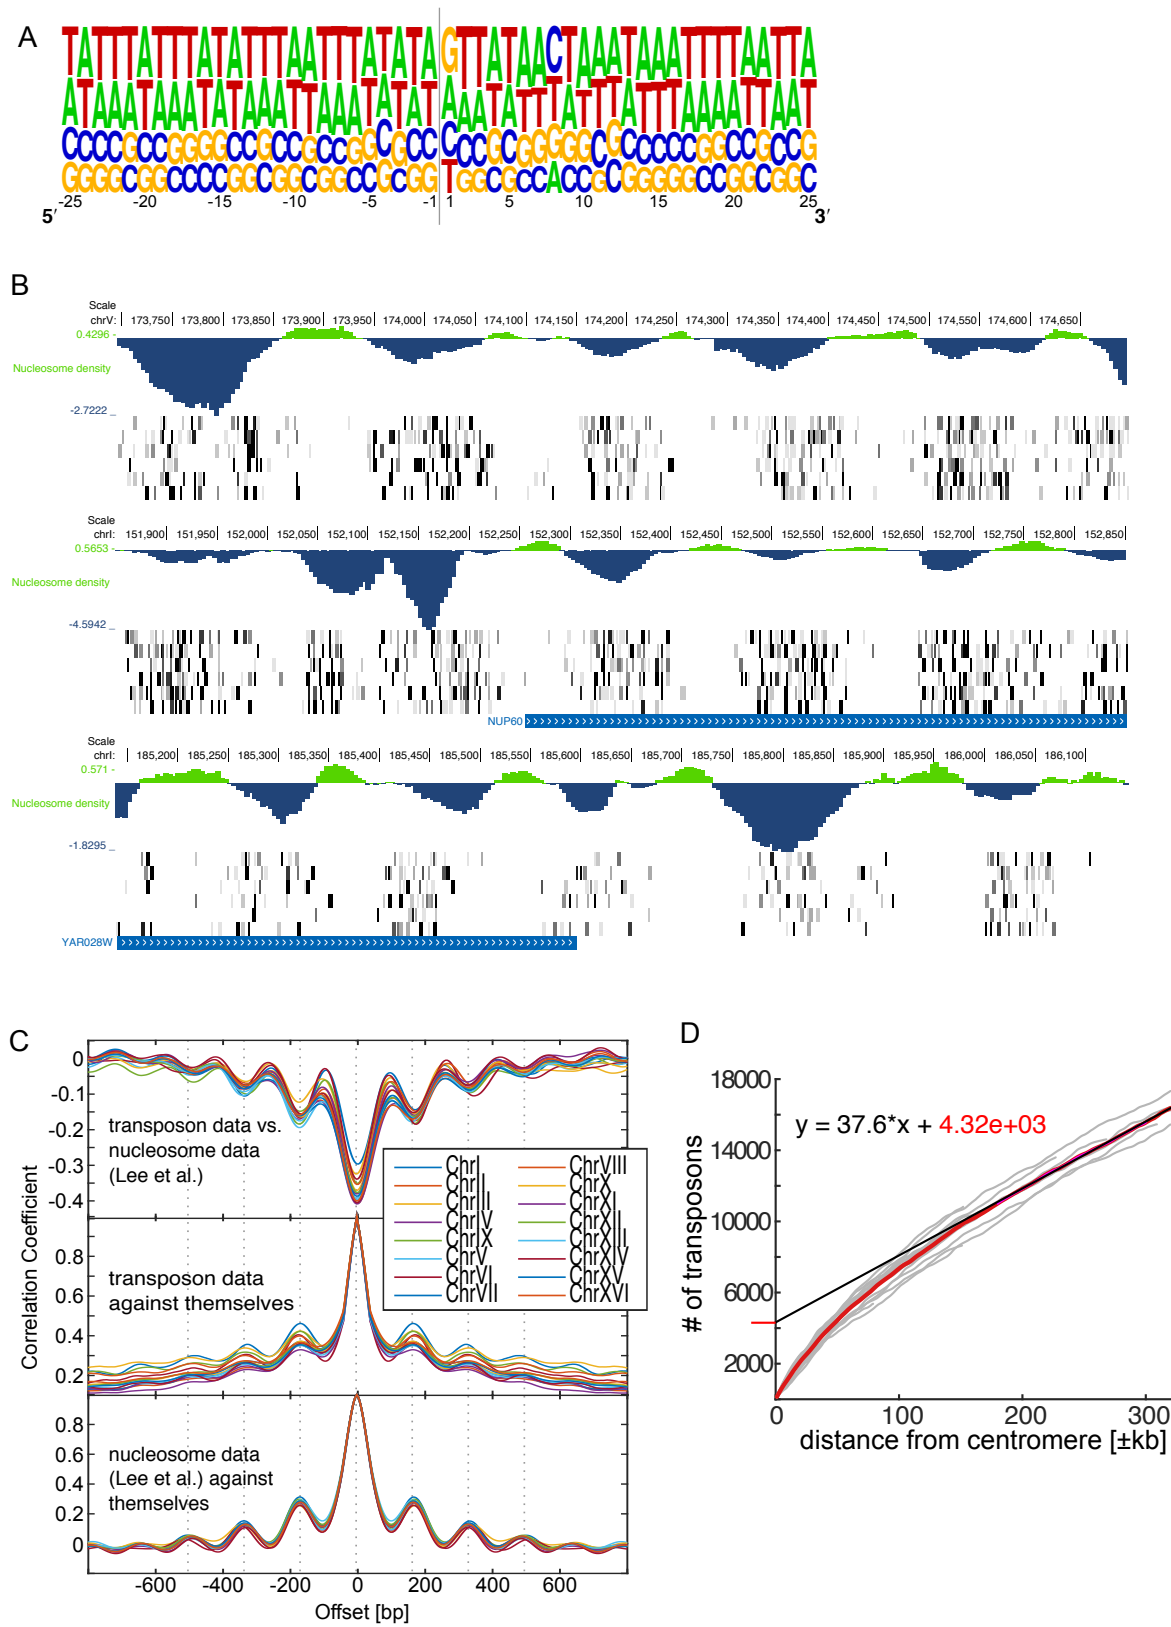

Supplement: supp [file elife_poa_e23570_Figure_1_figure_Supplement_2.pdf › elife_poa_e23570_Figure_1_figure_Supplement_2.pdf]

Figure 1 Supplement 3

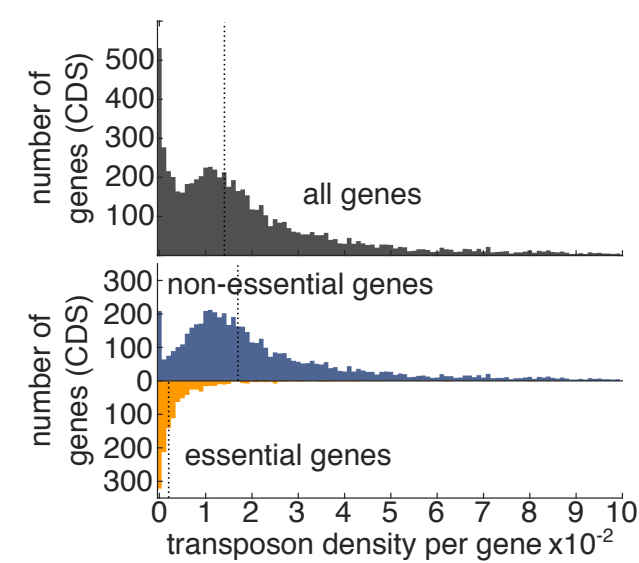

Supplement: supp [file elife_poa_e23570_Figure_1_figure_Supplement_3.pdf › elife_poa_e23570_Figure_1_figure_Supplement_3.pdf]

Figure 2 - supplement 2

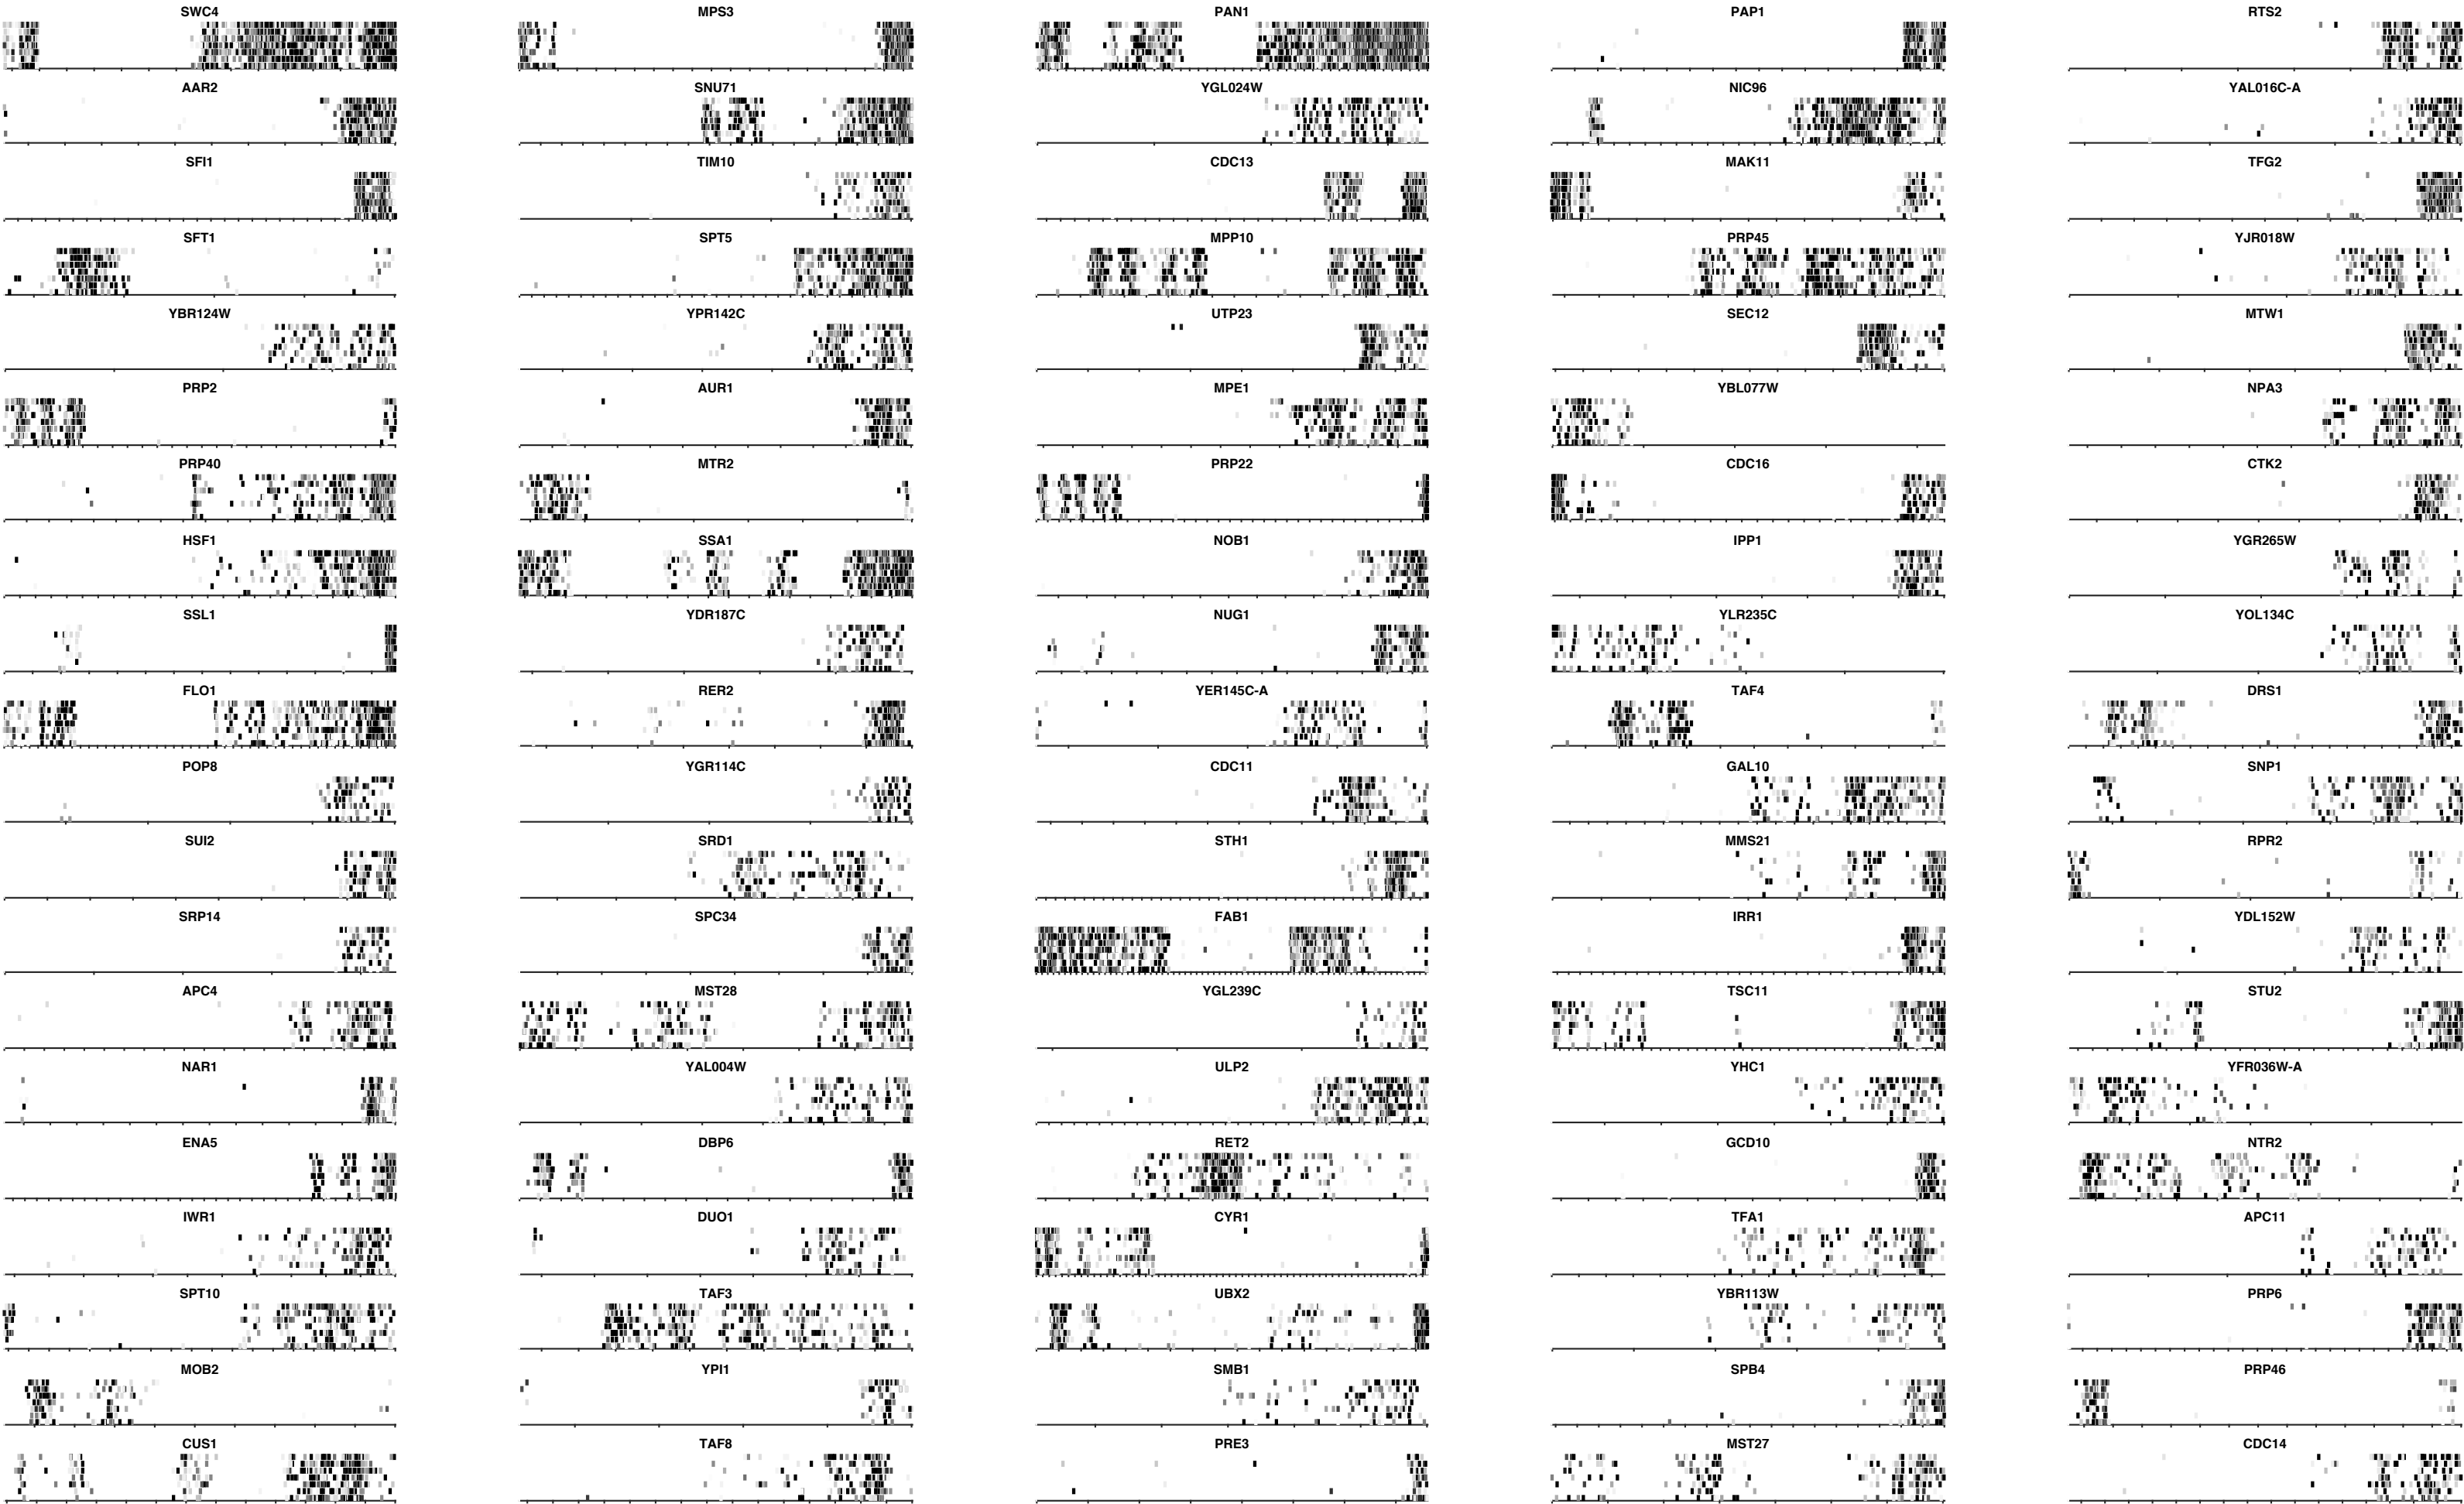

Supplement: supp [file elife_poa_e23570_Figure_2_figure_Supplement_2.pdf › elife_poa_e23570_Figure_2_figure_Supplement_2.pdf]

Figure 2 - supplement 3

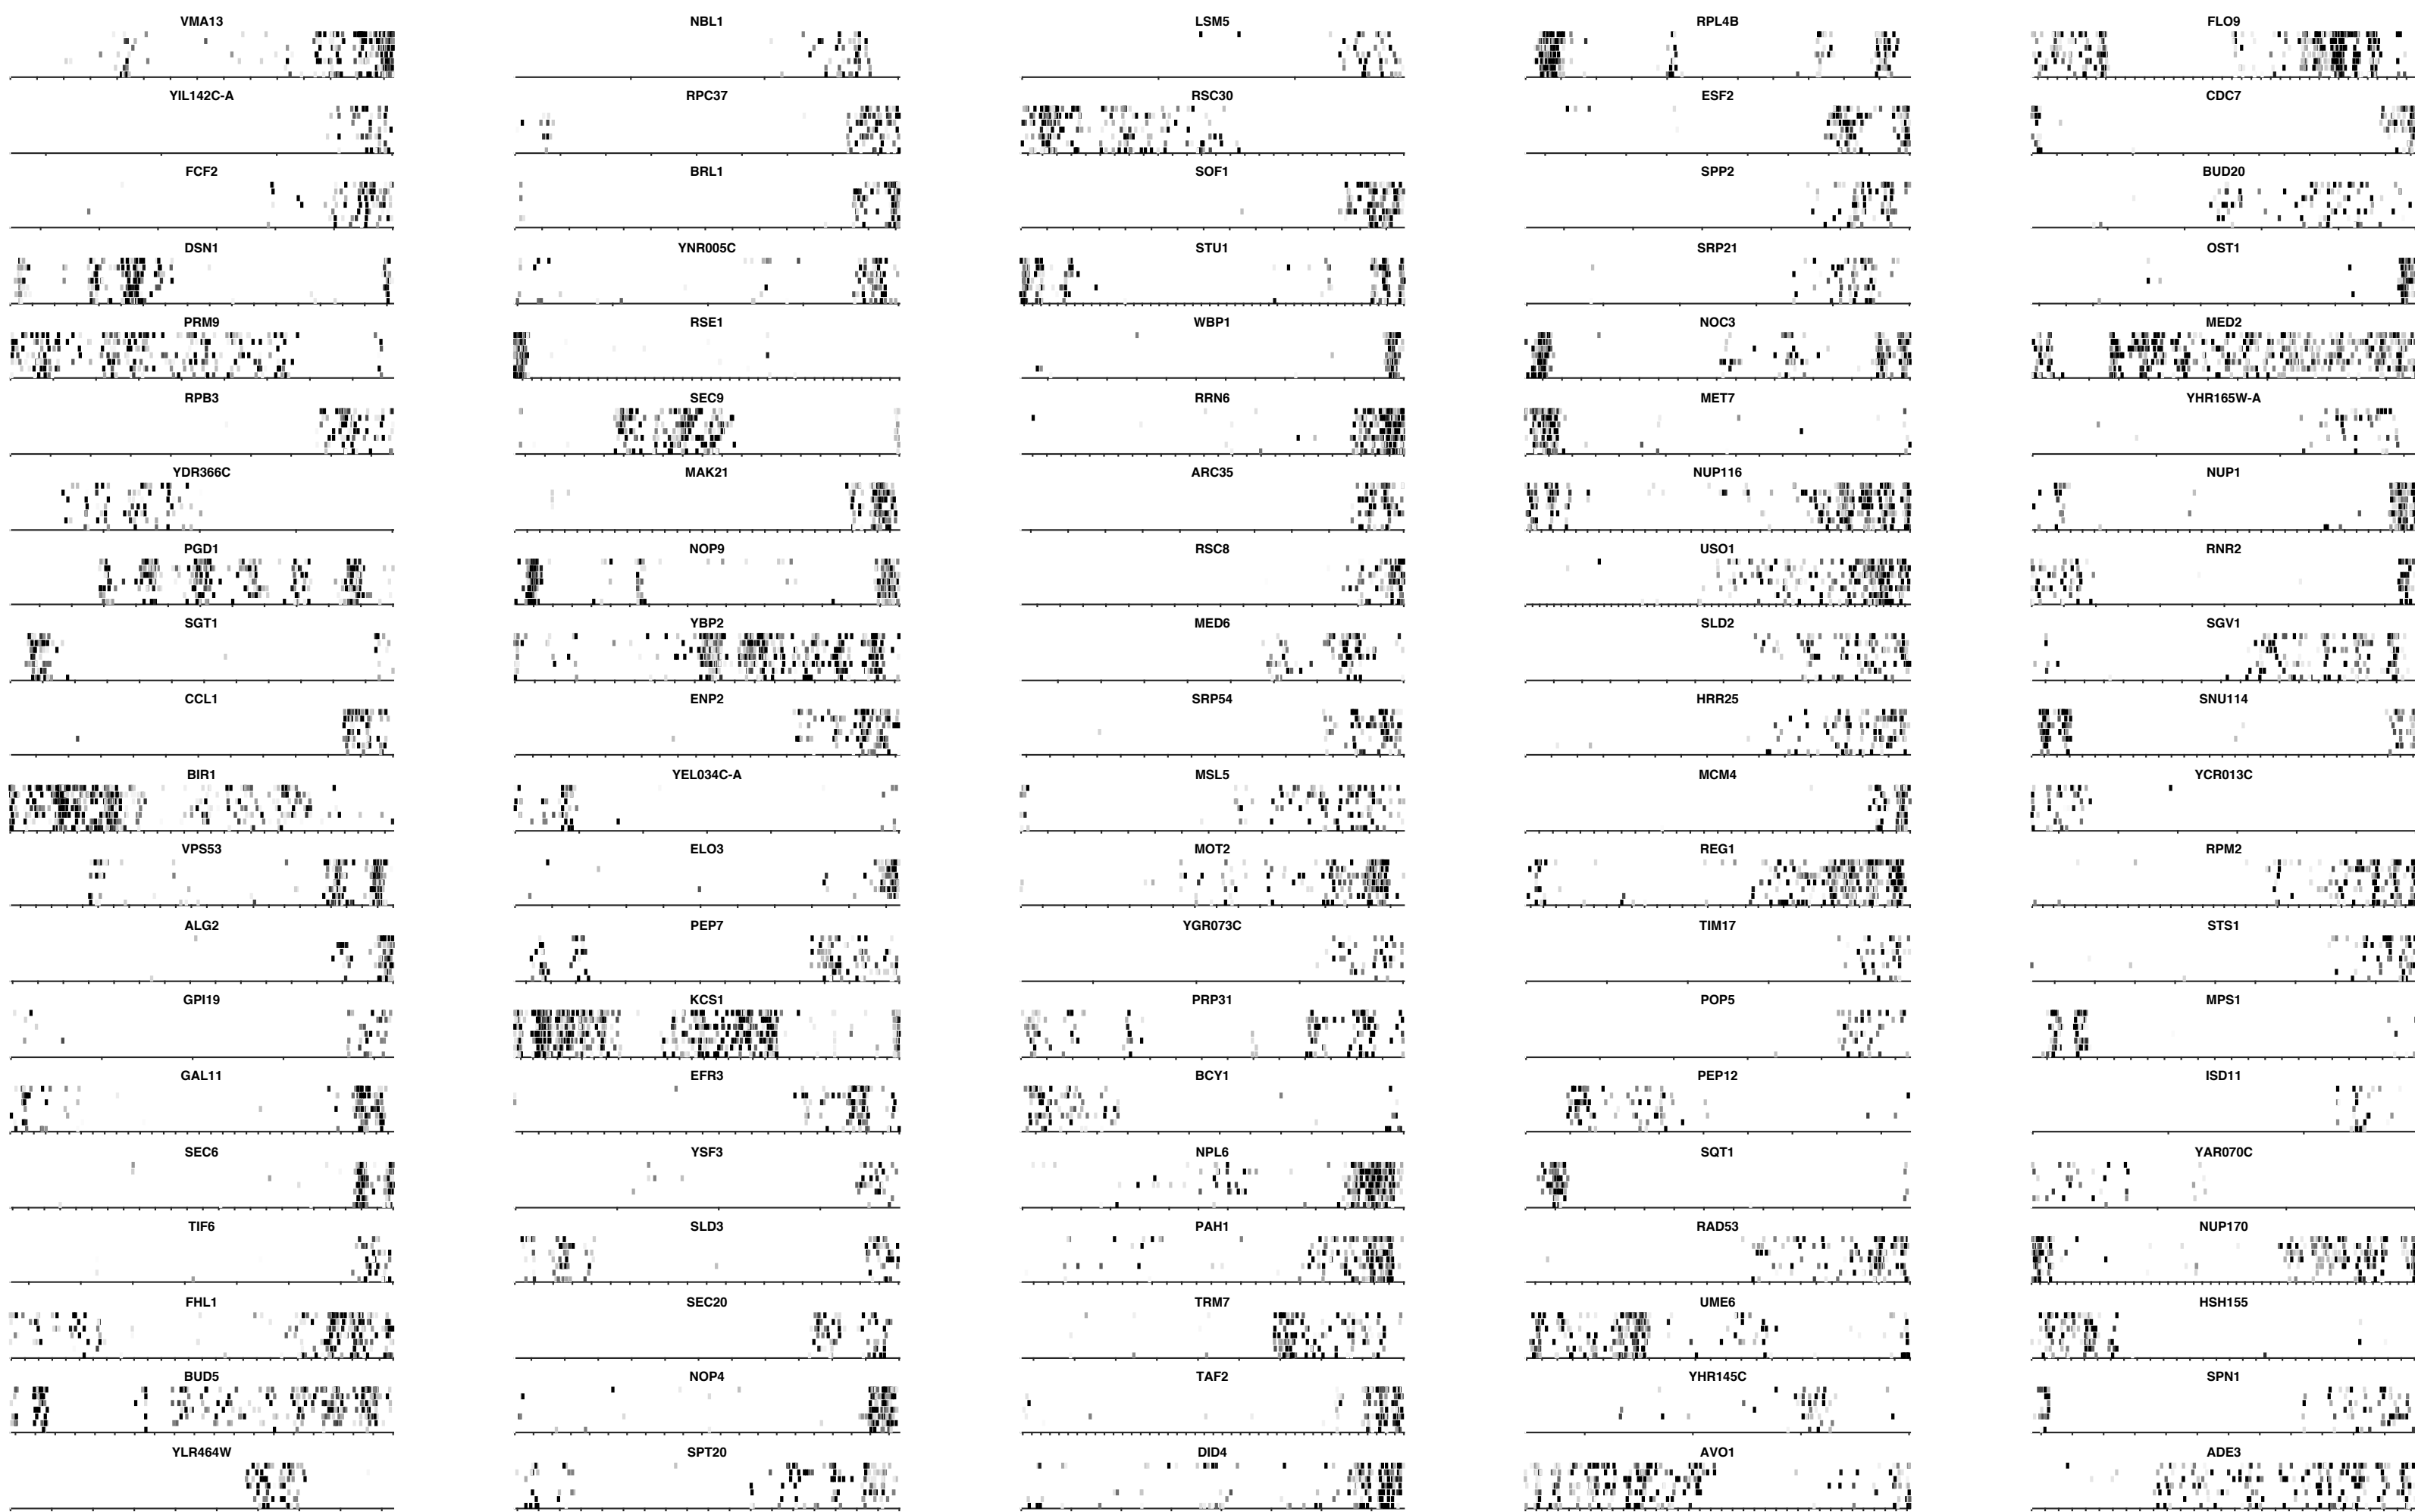

Supplement: supp [file elife_poa_e23570_Figure_2_figure_Supplement_3.pdf › elife_poa_e23570_Figure_2_figure_Supplement_3.pdf]

Figure 2 - supplement 4

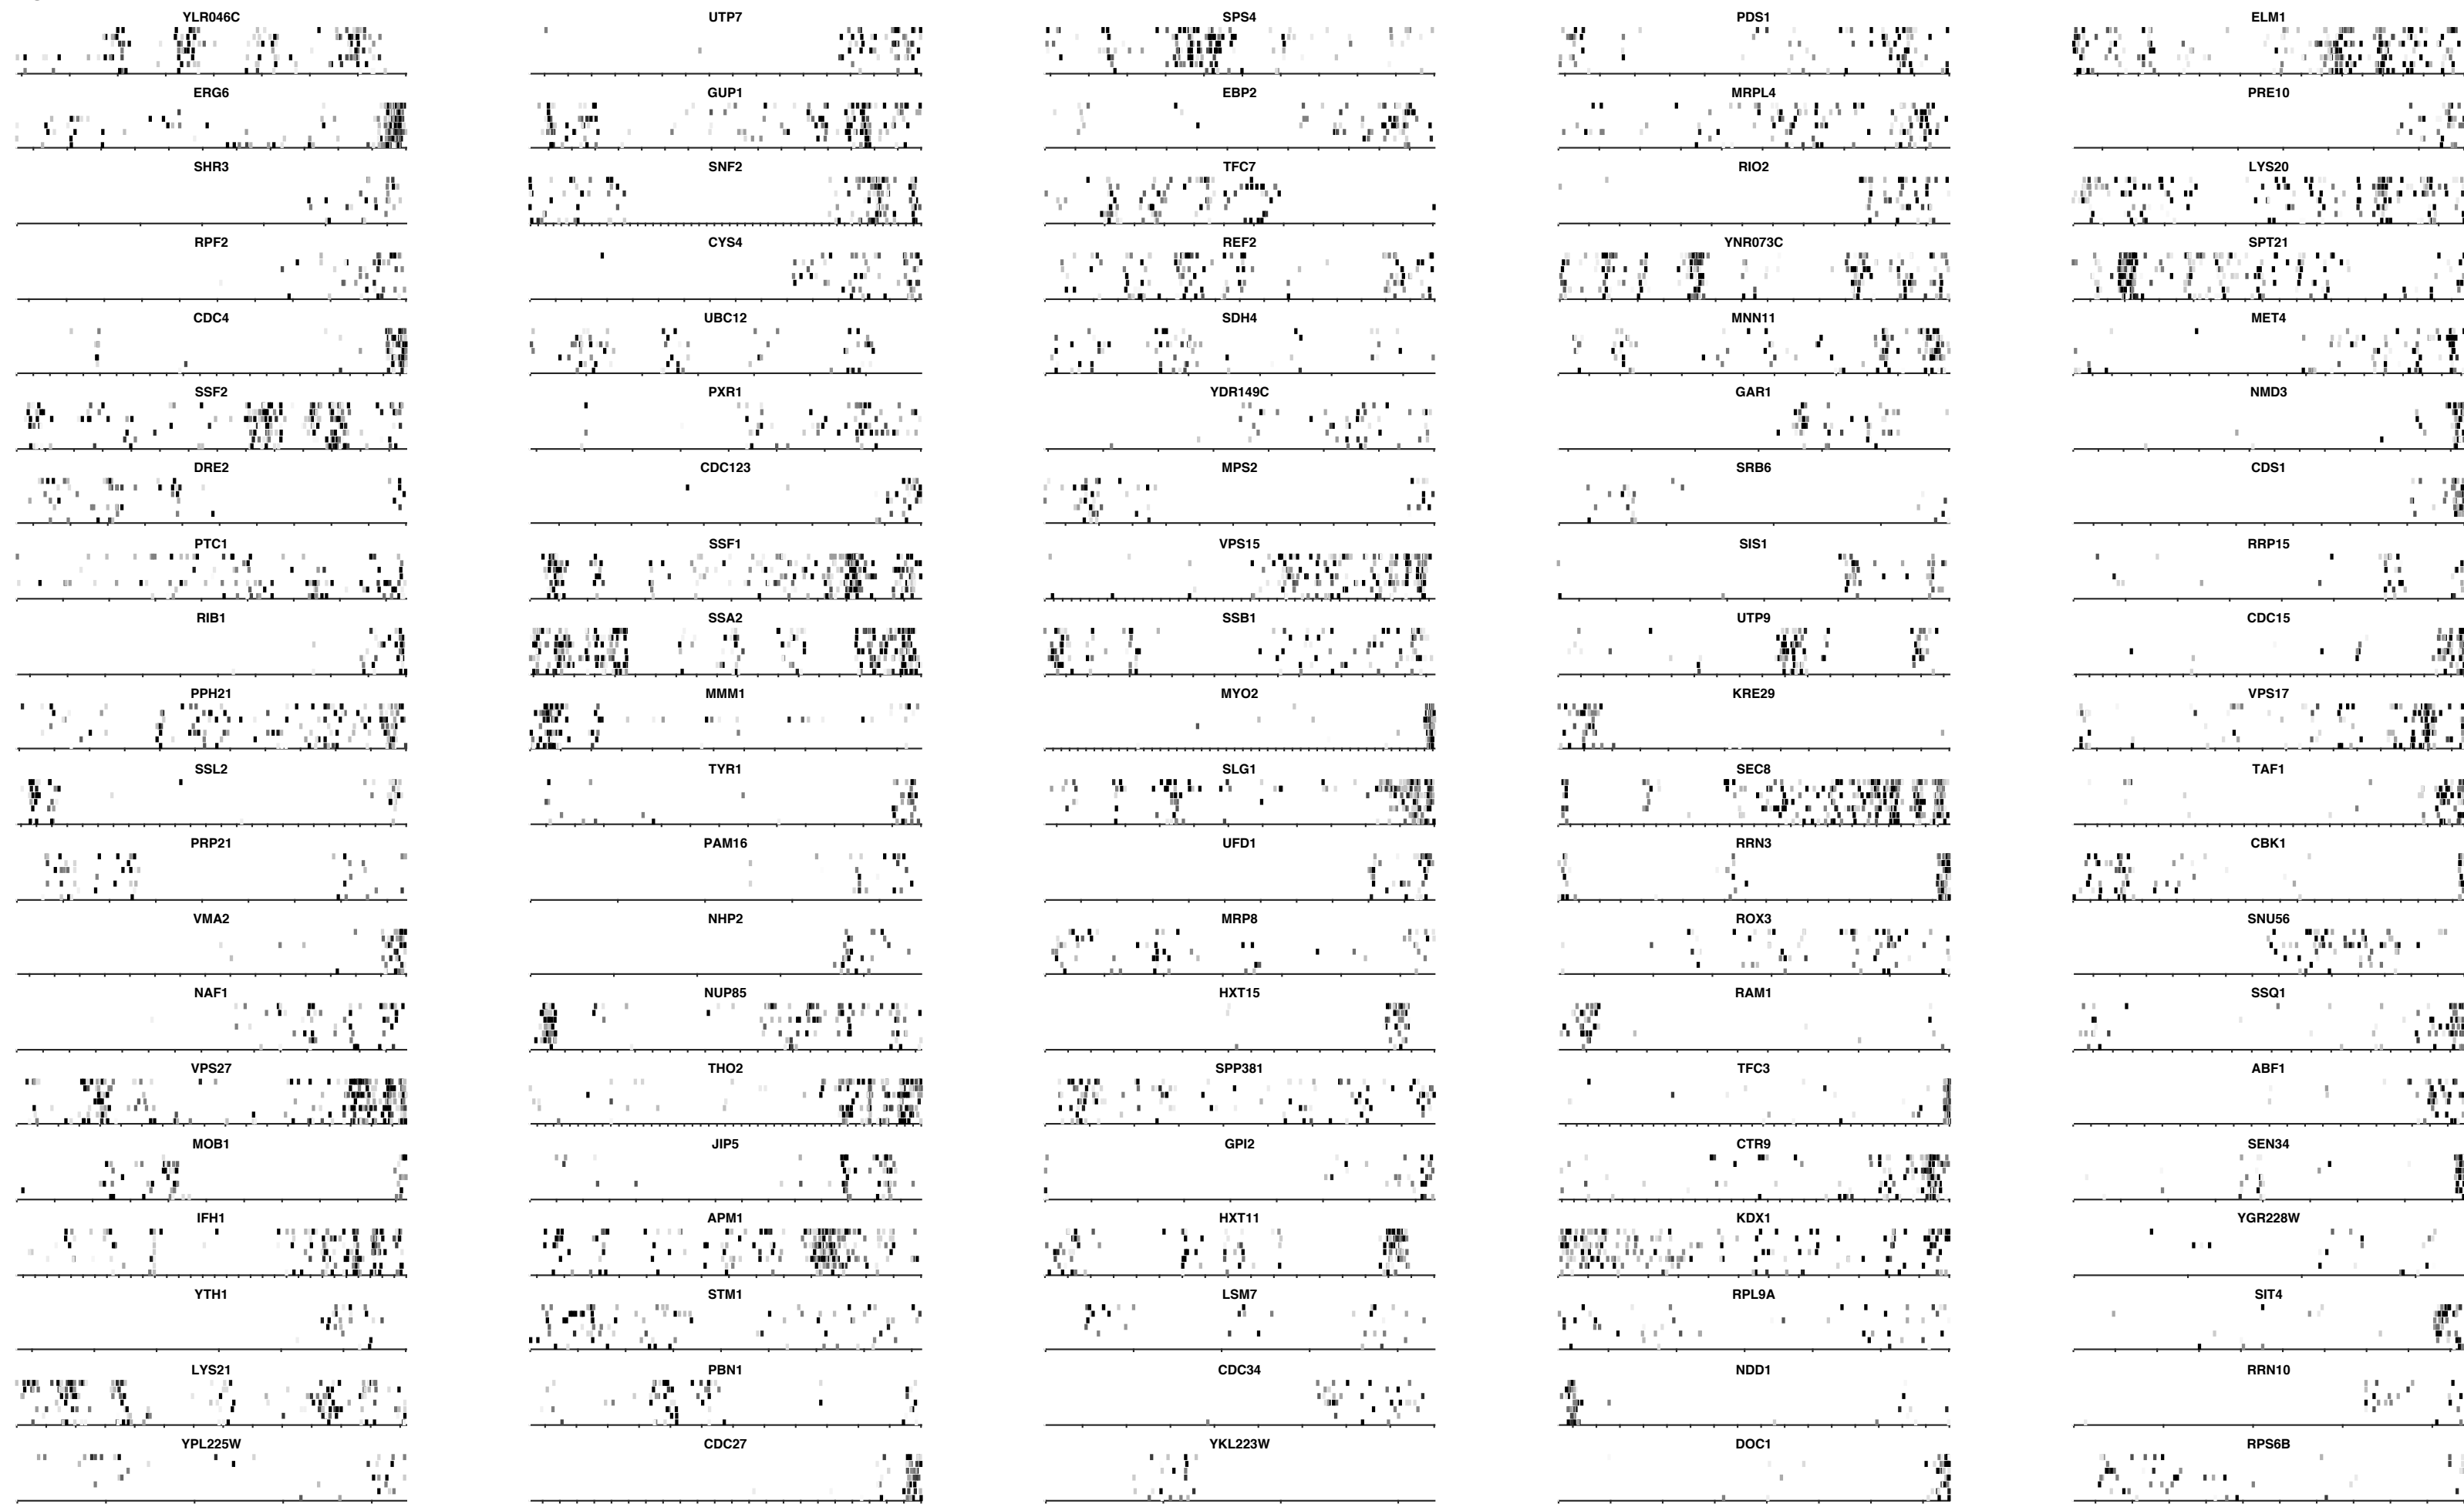

Supplement: supp [file elife_poa_e23570_Figure_2_figure_Supplement_4.pdf › elife_poa_e23570_Figure_2_figure_Supplement_4.pdf]

Figure 2 - supplement 5

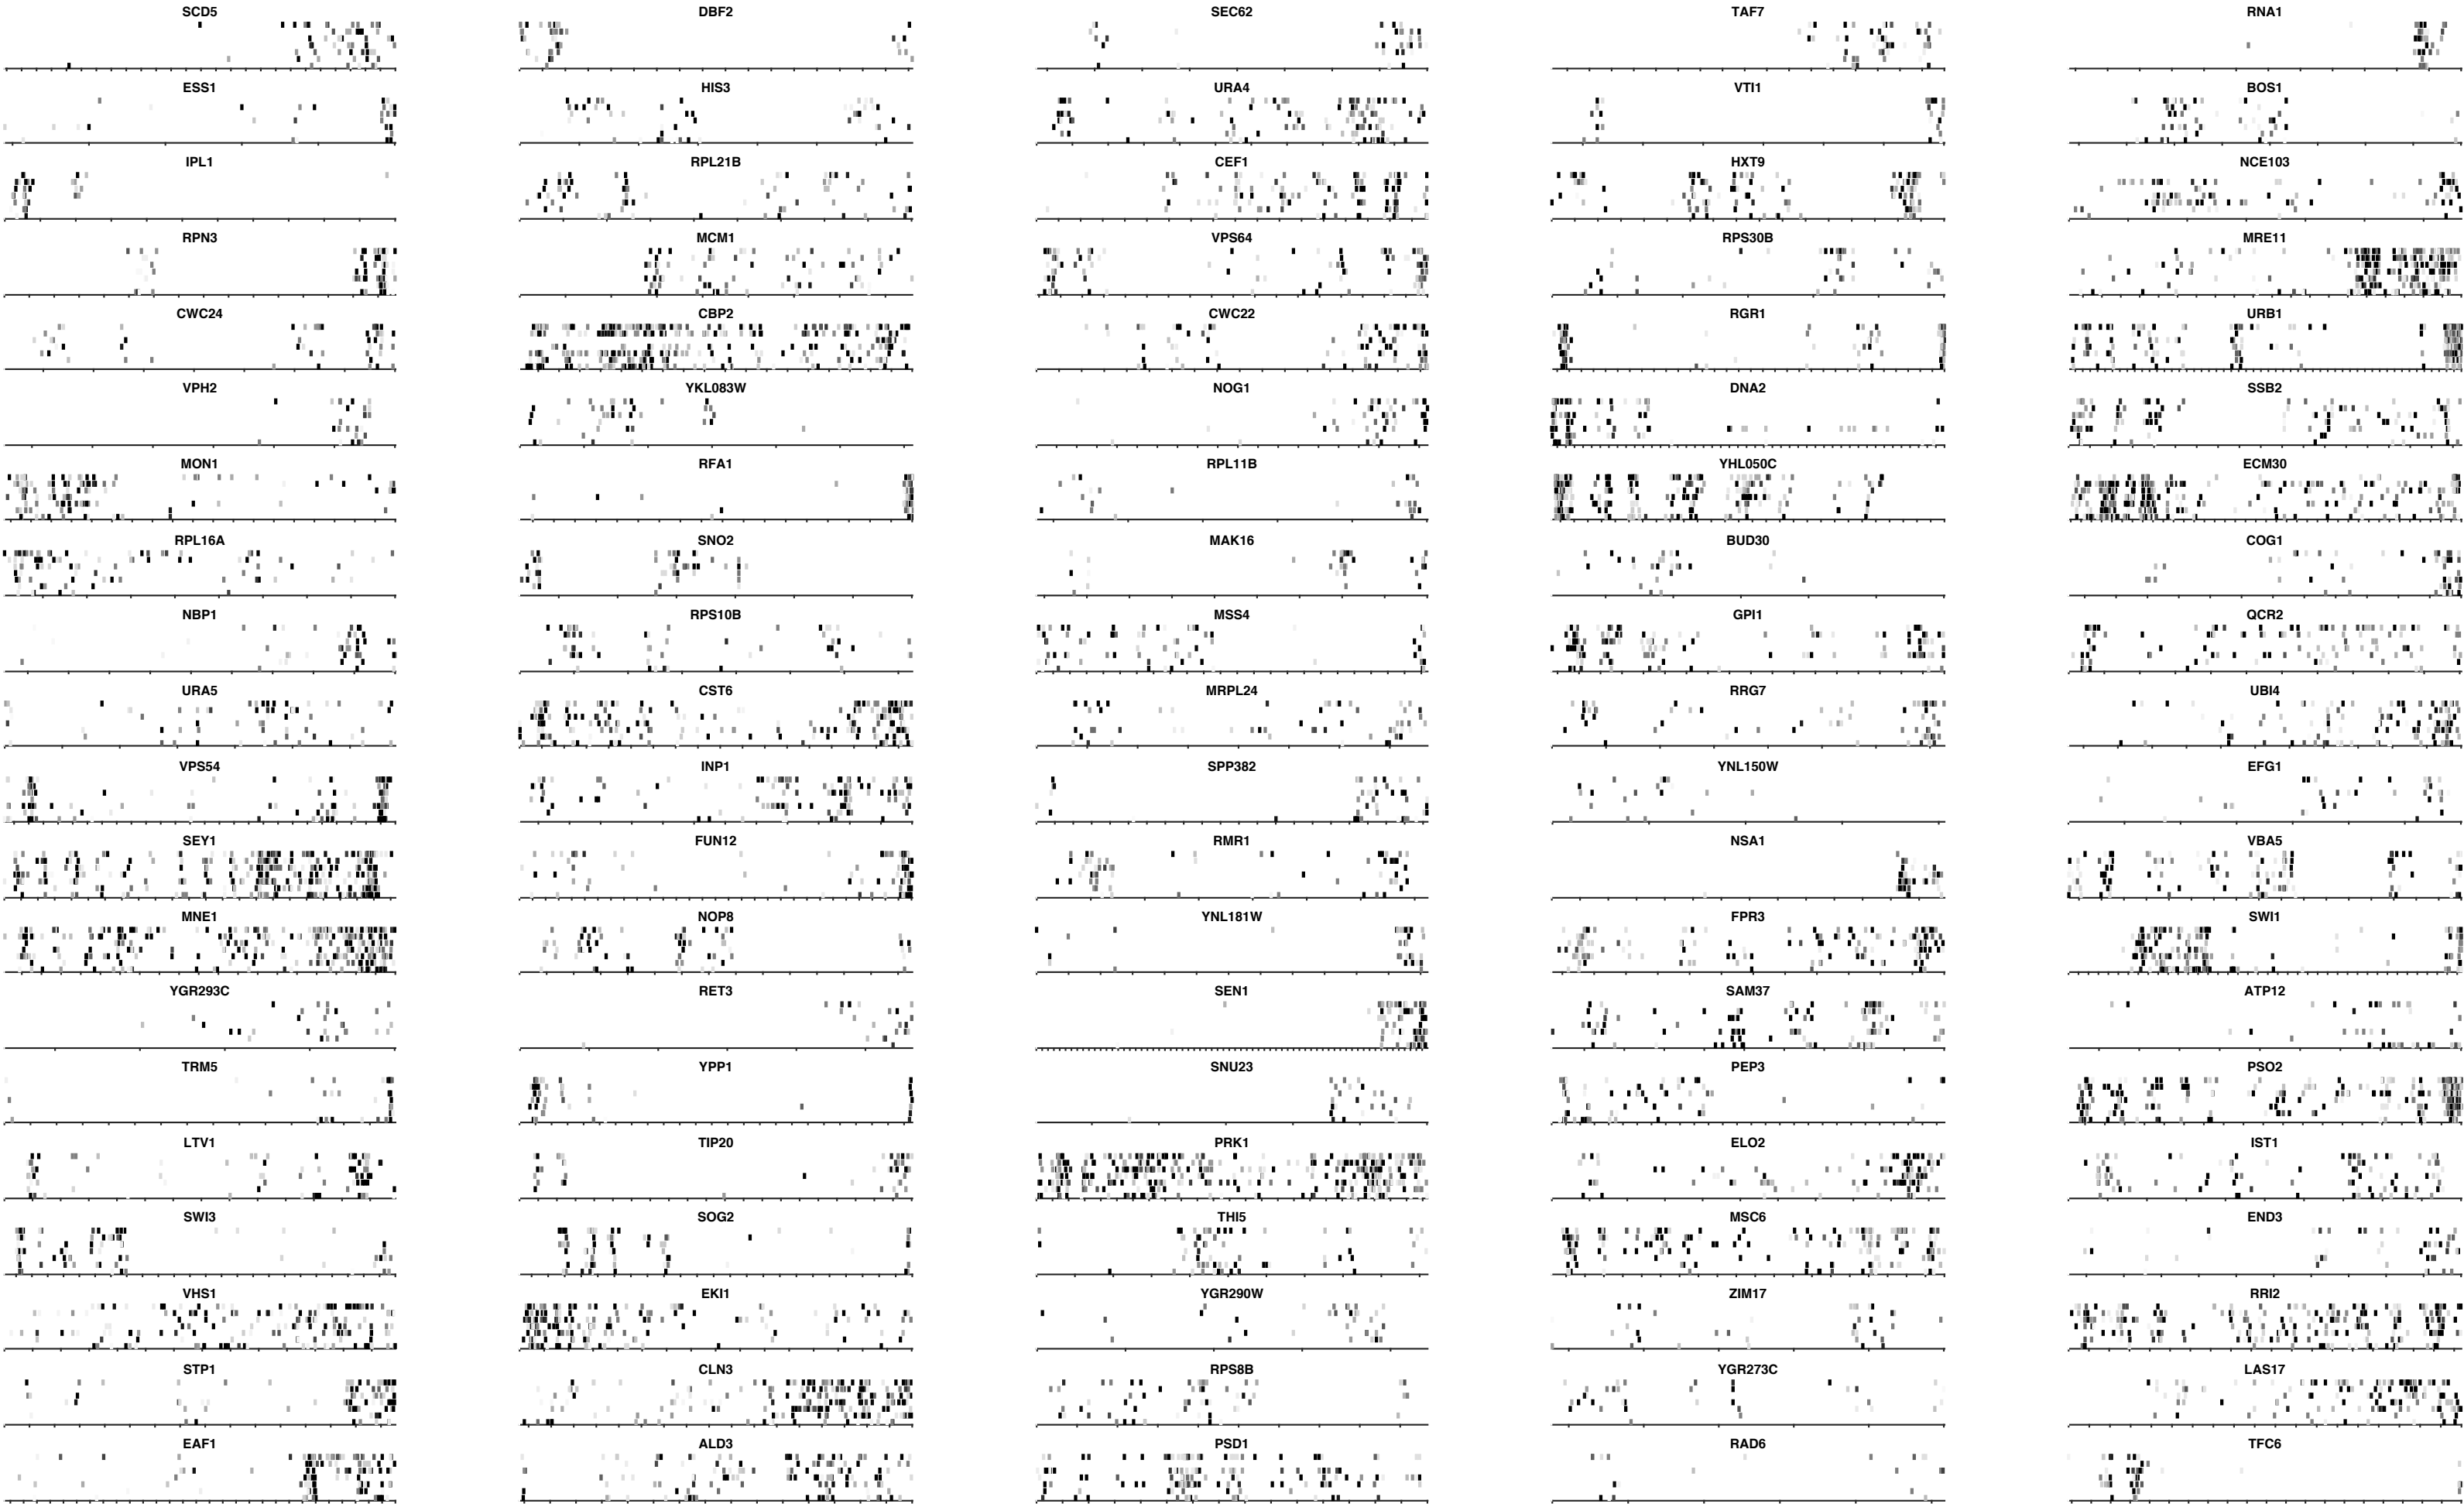

Supplement: supp [file elife_poa_e23570_Figure_2_figure_Supplement_5.pdf › elife_poa_e23570_Figure_2_figure_Supplement_5.pdf]

Figure 4 Supplement 1

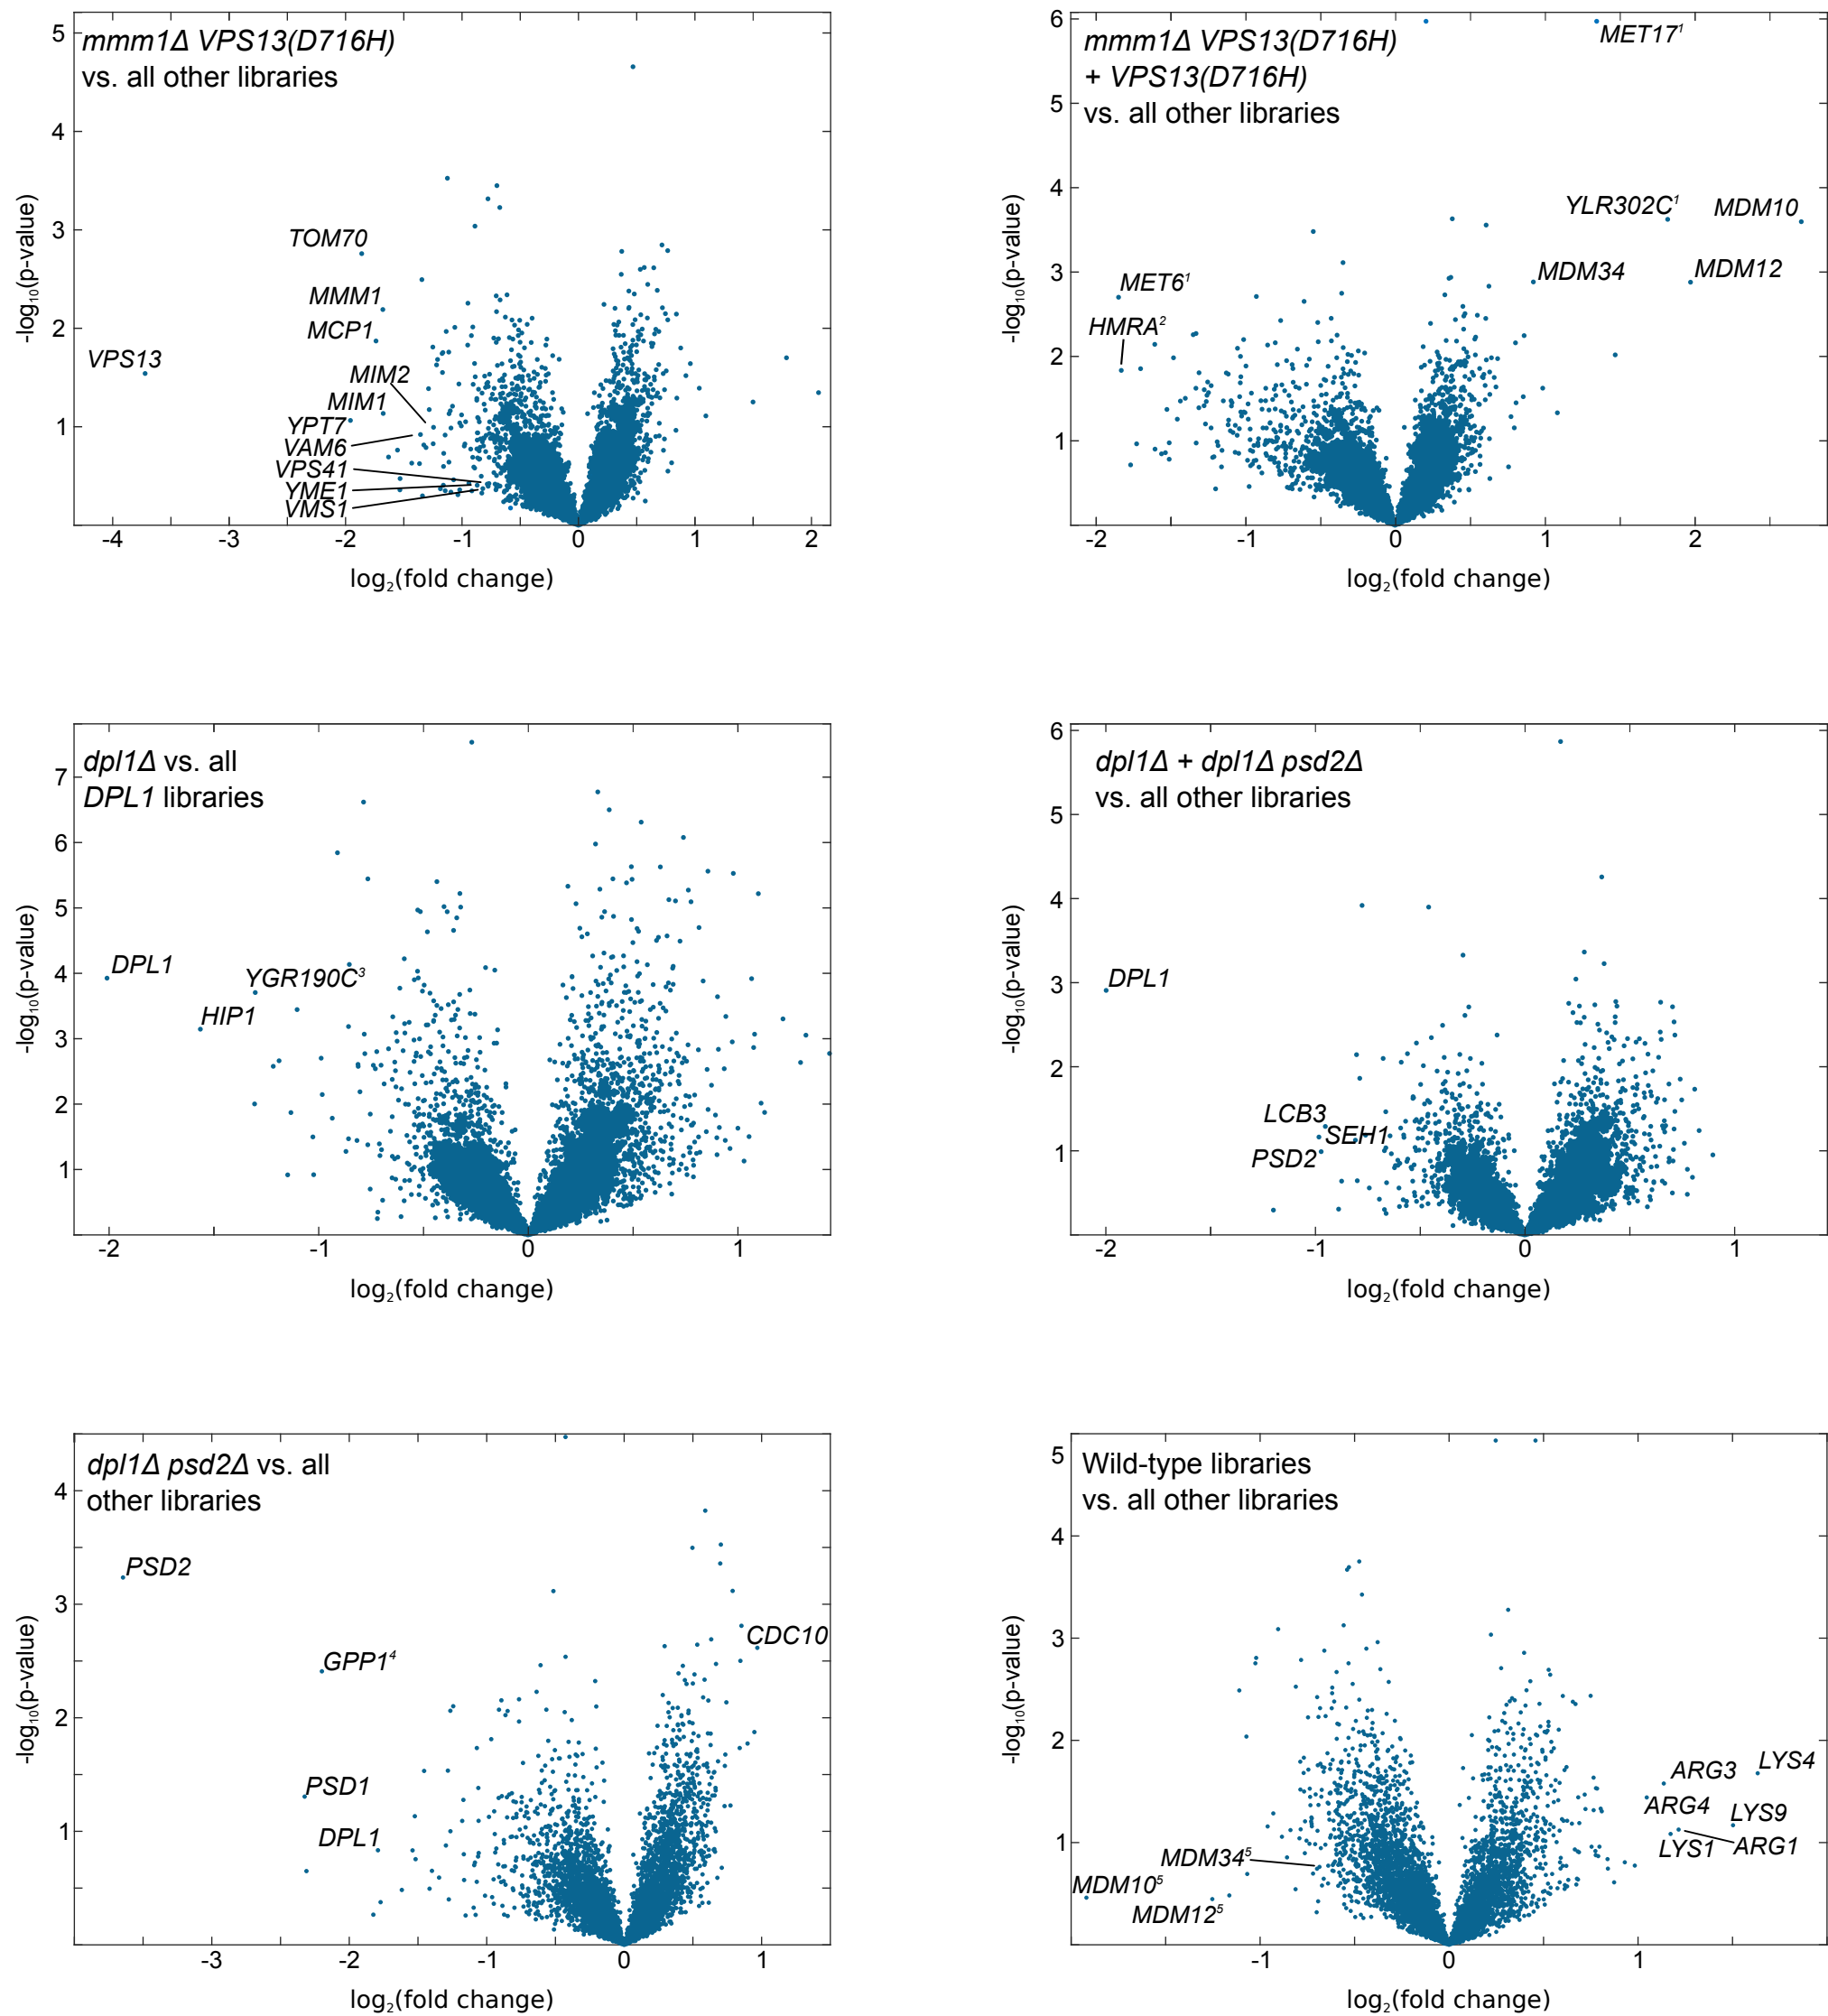

Supplement: supp [file elife_poa_e23570_Figure_4_figure_Supplement_1.pdf › elife_poa_e23570_Figure_4_figure_Supplement_1.pdf]

Figure 6 Supplement 1

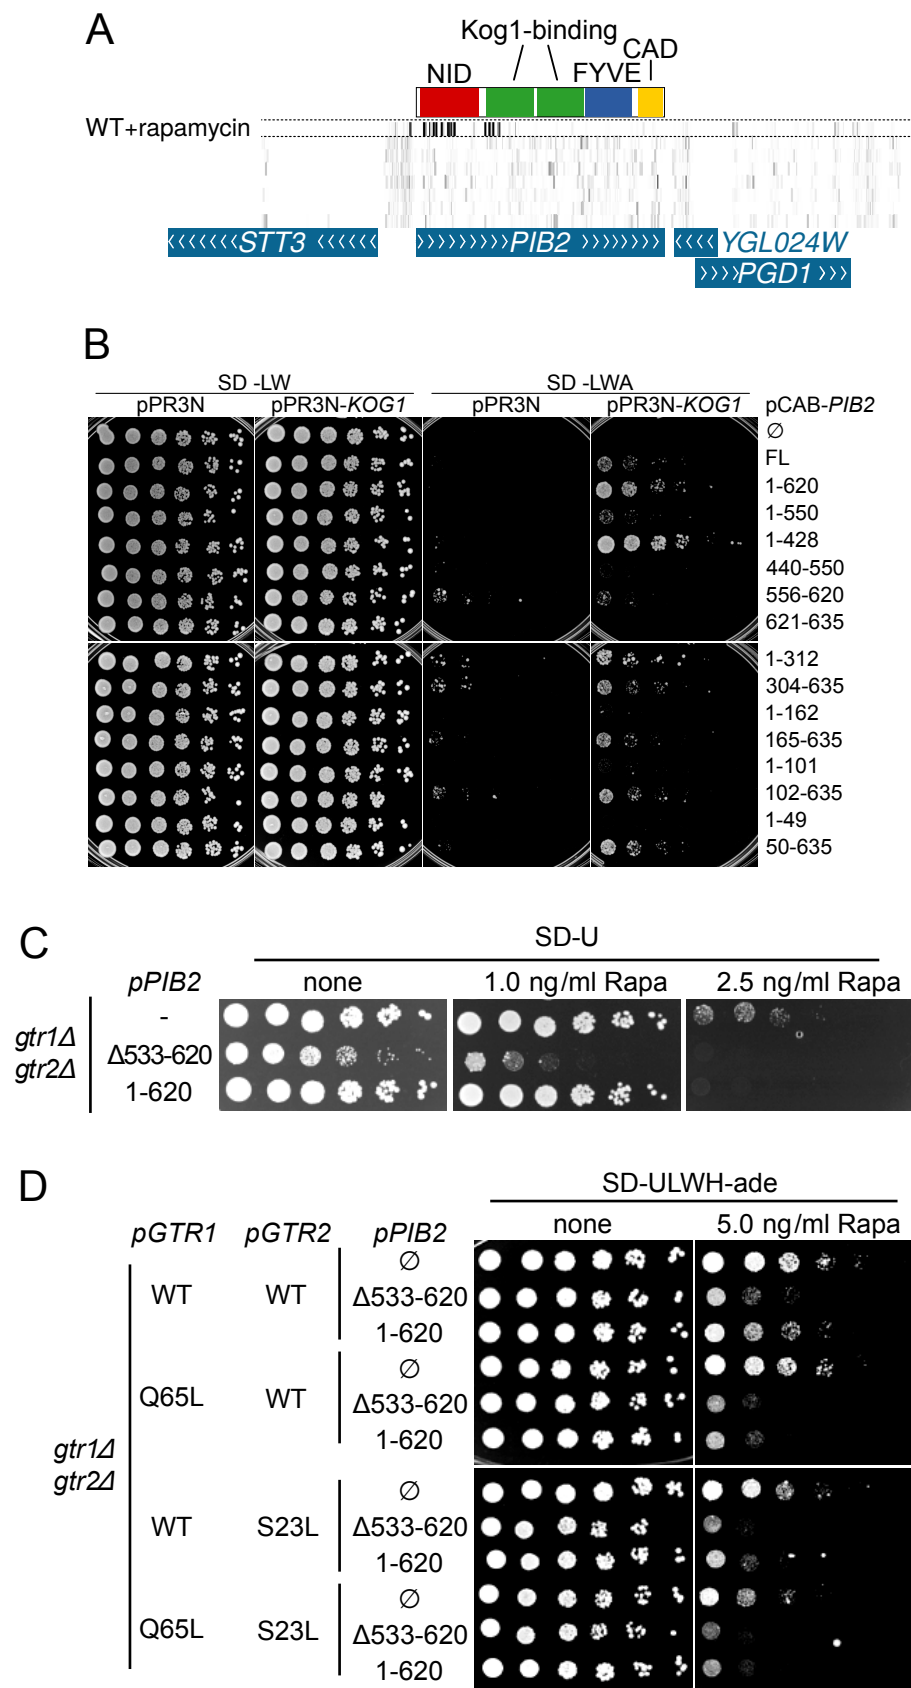

Supplement: supp [file elife_poa_e23570_Figure_6_figure_Supplement_1.pdf › elife_poa_e23570_Figure_6_figure_Supplement_1.pdf]
